# Supplementary material for: A QSP Model for Predicting Clinical Responses to Monotherapy, Combination and Sequential Therapy Following CTLA-4, PD-1, and PD-L1 Checkpoint Blockade
Source: PubMed Central journal article supplement (PMC6677731; doi:10.1038/s41598-019-47802-4), 2019-08-02
Supplement: 41598_2019_47802_MOESM1_ESM.pdf [file 41598_2019_47802_MOESM1_ESM.pdf]

## **A QSP Model for Predicting Clinical Responses to Monotherapy, Combination and Sequential Therapy Following CTLA-4, PD-1, and PD-L1 Checkpoint Blockade**

Oleg Milberg\*<sup>1</sup>, Chang Gong<sup>1</sup>, Mohammad Jafarnejad<sup>1</sup>, Imke H. Bartelink<sup>2,5</sup>, Bing Wang<sup>2</sup>, Paolo Vicini<sup>3</sup>, Rajesh Narwal<sup>4</sup>, Lorin Roskos<sup>4</sup>, and Aleksander S. Popel<sup>1,6</sup>

<sup>1</sup>Department of Biomedical Engineering, Johns Hopkins University School of Medicine, Baltimore, Maryland

<sup>2</sup> Clinical Pharmacology, Pharmacometrics and DMPK (CPD), MedImmune, South San Francisco, California, USA

<sup>3</sup> Clinical Pharmacology, Pharmacometrics and DMPK, MedImmune, Cambridge, United Kingdom;

<sup>4</sup> MedImmune, Gaithersburg, Maryland, USA

<sup>5</sup> Department of Clinical Pharmacology and Pharmacy, Amsterdam UMC, Vrije Universiteit Amsterdam, The Netherlands

<sup>6</sup> The Sidney Kimmel Comprehensive Cancer Center, Johns Hopkins University School of Medicine, Baltimore, Maryland

Address for Correspondence:

Oleg Milberg, Ph.D.

Department of Biomedical Engineering

School of Medicine

Johns Hopkins University

720 Rutland Avenue

Baltimore, MD 21205

Telephone: 301-651-4868

Email: [oleg.milberg@gmail.com](mailto:oleg.milberg@gmail.com)

**Keywords:** Immuno-oncology, immunotherapy, melanoma, systems biology, computational model, T cell, quantitative systems pharmacology (QSP), pharmacokinetics (PK), pharmacodynamics (PD), checkpoint inhibitor therapies, virtual clinical trials, virtual patients, combination therapy, sequential therapy, multiscale modeling

Table S1 – Model Reactions (Start)

| Reaction Number | Reaction                                                                                                                         |
|-----------------|----------------------------------------------------------------------------------------------------------------------------------|
| 1               | [Blood-Lymph].CTLA4_mabB <-> Lymph_Node.CTLA4_mab                                                                                |
| 2               | [Blood-Lymph].CTLA4_mabB <-> Peripheral.CTLA4_mabP_leaky                                                                         |
| 3               | [Blood-Lymph].CTLA4_mabB <-> Peripheral.CTLA4_mabP_tight                                                                         |
| 4               | [Blood-Lymph].CTLA4_mabB <-> Tumor.CTLA4_mabt                                                                                    |
| 5               | [Blood-Lymph].CTLA4_mabB -> null                                                                                                 |
| 6               | [Blood-Lymph].Effector_T_TB -> [Blood-Lymph].Effector_T_TB + [Blood-Lymph].Effector_TB                                           |
| 7               | [Blood-Lymph].Effector_TB -> Liv_Spln_GI.EffT_GI_f_Vasc                                                                          |
| 8               | [Blood-Lymph].Effector_TB -> Liv_Spln_GI.EffT_Liver_f_Vasc                                                                       |
| 9               | [Blood-Lymph].Effector_TB -> Liv_Spln_GI.EffT_Spleen_f_Vasc                                                                      |
| 10              | [Blood-Lymph].Effector_TB -> Lymph_Node.EffT_LN_f_Vasc                                                                           |
| 11              | [Blood-Lymph].Effector_TB -> null                                                                                                |
| 12              | [Blood-Lymph].Effector_TB -> Peripheral.EffT_P_f_Vasc                                                                            |
| 13              | [Blood-Lymph].Effector_TB -> Tumor.EffT_f_Vasc                                                                                   |
| 14              | [Blood-Lymph].PD1_mabb <-> Lymph_Node.PD1_mab                                                                                    |
| 15              | [Blood-Lymph].PD1_mabb <-> Peripheral.PD1_mabP_leaky                                                                             |
| 16              | [Blood-Lymph].PD1_mabb <-> Peripheral.PD1_mabP_tight                                                                             |
| 17              | [Blood-Lymph].PD1_mabb <-> Tumor.PD1_mabt                                                                                        |
| 18              | [Blood-Lymph].PD1_mabb -> null                                                                                                   |
| 19              | [Blood-Lymph].PDL1_mabb <-> Lymph_Node.PDL1_mab                                                                                  |
| 20              | [Blood-Lymph].PDL1_mabb <-> Peripheral.PDL1_mabP_leaky                                                                           |
| 21              | [Blood-Lymph].PDL1_mabb <-> Peripheral.PDL1_mabP_tight                                                                           |
| 22              | [Blood-Lymph].PDL1_mabb <-> Tumor.PDL1_mabt                                                                                      |
| 23              | [Blood-Lymph].PDL1_mabb -> null                                                                                                  |
| 24              | [Blood-Lymph].PDL1_mabb -> null                                                                                                  |
| 25              | Liv_Spln_GI.EffT_GI_f_Vasc -> Liv_Spln_GI.EffT_Liver_f_Vasc                                                                      |
| 26              | Liv_Spln_GI.EffT_GI_f_Vasc -> null                                                                                               |
| 27              | Liv_Spln_GI.EffT_Liver_AR_Vasc -> Liv_Spln_GI.EffT_LiverEx                                                                       |
| 28              | Liv_Spln_GI.EffT_Liver_AR_Vasc -> null                                                                                           |
| 29              | Liv_Spln_GI.EffT_Liver_b_Vasc -> Liv_Spln_GI.EffT_Liver_AR_Vasc                                                                  |
| 30              | Liv_Spln_GI.EffT_Liver_b_Vasc -> Liv_Spln_GI.EffT_Liver_f_Vasc                                                                   |
| 31              | Liv_Spln_GI.EffT_Liver_b_Vasc -> null                                                                                            |
| 32              | Liv_Spln_GI.EffT_Liver_f_Vasc -> Lungs.EffT_f_LungsVasc                                                                          |
| 33              | Liv_Spln_GI.EffT_Liver_f_Vasc -> null                                                                                            |
| 34              | Liv_Spln_GI.EffT_LiverEx -> Lymph_Node.EffT_LN_ExRec                                                                             |
| 35              | Liv_Spln_GI.EffT_LiverEx -> null                                                                                                 |
| 36              | Liv_Spln_GI.EffT_Spleen_AR_Vasc -> Liv_Spln_GI.EffT_SpleenEx                                                                     |
| 37              | Liv_Spln_GI.EffT_Spleen_AR_Vasc -> null                                                                                          |
| 38              | Liv_Spln_GI.EffT_Spleen_b_Vasc -> Liv_Spln_GI.EffT_Spleen_AR_Vasc                                                                |
| 39              | Liv_Spln_GI.EffT_Spleen_b_Vasc -> Liv_Spln_GI.EffT_Spleen_f_Vasc                                                                 |
| 40              | Liv_Spln_GI.EffT_Spleen_b_Vasc -> null                                                                                           |
| 41              | Liv_Spln_GI.EffT_Spleen_f_Vasc + Liv_Spln_GI.Spleen_Free_Sites -> Liv_Spln_GI.EffT_Spleen_b_Vasc + Liv_Spln_GI.Spleen_Free_Sites |
| 42              | Liv_Spln_GI.EffT_Spleen_f_Vasc -> Liv_Spln_GI.EffT_Liver_f_Vasc                                                                  |
| 43              | Liv_Spln_GI.EffT_Spleen_f_Vasc -> null                                                                                           |
| 44              | Liv_Spln_GI.EffT_SpleenEx -> Lymph_Node.EffT_LN_ExRec                                                                            |
| 45              | Liv_Spln_GI.EffT_SpleenEx -> null                                                                                                |
| 46              | Liv_Spln_GI.Liver_Free_Sites + Liv_Spln_GI.EffT_Liver_f_Vasc -> Liv_Spln_GI.EffT_Liver_b_Vasc + Liv_Spln_GI.Liver_Free_Sites     |
| 47              | Lungs.EffT_AR_LungsVasc -> Lungs.EffT_LungsEx                                                                                    |
| 48              | Lungs.EffT_AR_LungsVasc -> null                                                                                                  |
| 49              | Lungs.EffT_AR_LungsVasc -> null                                                                                                  |
| 50              | Lungs.EffT_f_LungsVasc + Lungs.Lung_Free_Sites -> Lungs.EffT_r_LungsVasc + Lungs.Lung_Free_Sites                                 |
| 51              | Lungs.EffT_f_LungsVasc -> [Blood-Lymph].Effector_TB                                                                              |
| 52              | Lungs.EffT_f_LungsVasc -> null                                                                                                   |
| 53              | Lungs.EffT_LungsEx -> Lymph_Node.EffT_LN_ExRec                                                                                   |
| 54              | Lungs.EffT_LungsEx -> null                                                                                                       |
| 55              | Lungs.EffT_r_LungsVasc -> Lungs.EffT_AR_LungsVasc                                                                                |

| Reaction Number | Reaction                                                                              |
|-----------------|---------------------------------------------------------------------------------------|
| 56              | Lungs.EffT_r_LungsVasc -> Lungs.EffT_f_LungsVasc                                      |
| 57              | Lungs.EffT_r_LungsVasc -> null                                                        |
| 58              | Lungs.EffT_r_LungsVasc -> null                                                        |
| 59              | Lymph_Node.[PNT-Tr_CD80] + Lymph_Node.[Tr-PNT_PDL1] <=> Lymph_Node.[TrPNT_PDL1-CD80]  |
| 60              | Lymph_Node.[PNT-Tr_CD80] -> null                                                      |
| 61              | Lymph_Node.[PNT-Tr_PD1] + Lymph_Node.[Tr-PNT_PDL1] <=> Lymph_Node.[TrPNT_PDL1-PD1]    |
| 62              | Lymph_Node.[PNT-Tr_PD1] + Lymph_Node.PD1_mab <=> Lymph_Node.PNTTr_PD1_aPD1            |
| 63              | Lymph_Node.[PNT-Tr_PD1] -> null                                                       |
| 64              | Lymph_Node.[PNT-Tr_PDL1] + Lymph_Node.PDL1_mab <=> Lymph_Node.PNTTr_PDL1_aPDL1        |
| 65              | Lymph_Node.[PNT-Tr_PDL1] -> null                                                      |
| 66              | Lymph_Node.[TregLN-NT] + Lymph_Node.Naive_T -> null                                   |
| 67              | Lymph_Node.[TregLN-NT] -> null                                                        |
| 68              | Lymph_Node.[TregLN-PNT] + Lymph_Node.Primed_Naive_T -> null                           |
| 69              | Lymph_Node.[TregLN-PNT] -> null                                                       |
| 70              | Lymph_Node.[TregLN-PNT1] -> Lymph_Node.[PNT-Tr_CD80] + Lymph_Node.[TregLN-PNT1]       |
| 71              | Lymph_Node.[TregLN-PNT1] -> Lymph_Node.[PNT-Tr_PD1] + Lymph_Node.[TregLN-PNT1]        |
| 72              | Lymph_Node.[TregLN-PNT1] -> Lymph_Node.[PNT-Tr_PDL1] + Lymph_Node.[TregLN-PNT1]       |
| 73              | Lymph_Node.[TregLN-PNT1] -> Lymph_Node.[Tr-PNT_PD1] + Lymph_Node.[TregLN-PNT1]        |
| 74              | Lymph_Node.[TregLN-PNT1] -> Lymph_Node.[Tr-PNT_PDL1] + Lymph_Node.[TregLN-PNT1]       |
| 75              | Lymph_Node.[Tr-mAPC_CD80] -> null                                                     |
| 76              | Lymph_Node.[Tr-mAPC_CD86] -> null                                                     |
| 77              | Lymph_Node.[Tr-mAPC_CTLA4] + Lymph_Node.[Tr-mAPC_CD80] <=> Lymph_Node.TrALN_CT_CD80   |
| 78              | Lymph_Node.[Tr-mAPC_CTLA4] + Lymph_Node.[Tr-mAPC_CD86] <=> Lymph_Node.TrALN_CT_CD86   |
| 79              | Lymph_Node.[Tr-mAPC_CTLA4] + Lymph_Node.CTLA4_mab <=> Lymph_Node.TrALN_CT_aCT         |
| 80              | Lymph_Node.[Tr-mAPC_CTLA4] -> null                                                    |
| 81              | Lymph_Node.[Tr-PNT_PD1] + Lymph_Node.[PNT-Tr_PDL1] <=> Lymph_Node.[TrPNT_PD1-L1]      |
| 82              | Lymph_Node.[Tr-PNT_PD1] + Lymph_Node.PD1_mab <=> Lymph_Node.TrPNT_PD1_aPD1            |
| 83              | Lymph_Node.[Tr-PNT_PD1] -> null                                                       |
| 84              | Lymph_Node.[Tr-PNT_PDL1] + Lymph_Node.PDL1_mab <=> Lymph_Node.TrPNT_PDL1_aPDL1        |
| 85              | Lymph_Node.[Tr-PNT_PDL1] -> null                                                      |
| 86              | Lymph_Node.APCLN + Lymph_Node.C_DebrisLN -> Lymph_Node.mAPC                           |
| 87              | Lymph_Node.C_DebrisLN -> null                                                         |
| 88              | Lymph_Node.CTLA4_mab -> [Blood-Lymph].CTLA4_mabB                                      |
| 89              | Lymph_Node.CTLA4_mab + Lymph_Node.PNT_CTLA4 <=> Lymph_Node.CTLA4_mAb_CTLA4            |
| 90              | Lymph_Node.CTLA4_mAb_CTLA4 -> null                                                    |
| 91              | Lymph_Node.Effector_T -> null                                                         |
| 92              | Lymph_Node.EffT_LN_ExRec -> Lungs.EffT_f_LungsVasc                                    |
| 93              | Lymph_Node.EffT_LN_ExRec -> null                                                      |
| 94              | Lymph_Node.EffT_LN_f_Vasc -> Lungs.EffT_f_LungsVasc                                   |
| 95              | Lymph_Node.EffT_LN_f_Vasc -> null                                                     |
| 96              | Lymph_Node.mAPC -> Lymph_Node.mAPC_CD80 + Lymph_Node.mAPC                             |
| 97              | Lymph_Node.mAPC -> Lymph_Node.mAPC_CD86 + Lymph_Node.mAPC                             |
| 98              | Lymph_Node.mAPC -> Lymph_Node.mAPC_PD1 + Lymph_Node.mAPC                              |
| 99              | Lymph_Node.mAPC -> Lymph_Node.mAPC_PDL1 + Lymph_Node.mAPC                             |
| 100             | Lymph_Node.mAPC -> Lymph_Node.mAPC_PDL2 + Lymph_Node.mAPC                             |
| 101             | Lymph_Node.mAPC -> null                                                               |
| 102             | Lymph_Node.mAPC -> null                                                               |
| 103             | Lymph_Node.mAPC_CD80 -> null                                                          |
| 104             | Lymph_Node.mAPC_CD86 -> null                                                          |
| 105             | Lymph_Node.mAPC_Int_P1 -> Lymph_Node.mAPC_Int_P1 + Lymph_Node.mAPC_Int_P1_CD80        |
| 106             | Lymph_Node.mAPC_Int_P1 -> Lymph_Node.mAPC_Int_P1 + Lymph_Node.mAPC_Int_P1_CD86        |
| 107             | Lymph_Node.mAPC_Int_P1_CD80 -> null                                                   |
| 108             | Lymph_Node.mAPC_Int_P1_CD86 -> null                                                   |
| 109             | Lymph_Node.mAPC_Int_P2 -> Lymph_Node.mAPC_Int_P2_CD80 + Lymph_Node.mAPC_Int_P2        |
| 110             | Lymph_Node.mAPC_Int_P2 -> Lymph_Node.mAPC_Int_P2_CD86 + Lymph_Node.mAPC_Int_P2        |
| 111             | Lymph_Node.mAPC_Int_P2 -> Lymph_Node.mAPC_Int_P2_PD1 + Lymph_Node.mAPC_Int_P2         |
| 112             | Lymph_Node.mAPC_Int_P2 -> Lymph_Node.mAPC_Int_P2_PDL1 + Lymph_Node.mAPC_Int_P2        |
| 113             | Lymph_Node.mAPC_Int_P2 -> Lymph_Node.mAPC_Int_P2_PDL2 + Lymph_Node.mAPC_Int_P2        |
| 114             | Lymph_Node.mAPC_Int_P2_CD80 + Lymph_Node.PNT_CTLA4 <=> Lymph_Node.NEG_Sig_PNT_CD80    |
| 115             | Lymph_Node.mAPC_Int_P2_CD80 + Lymph_Node.PNT_Int_PDL1 <=> Lymph_Node.[PNT_PDL1-CD80]  |
| 116             | Lymph_Node.mAPC_Int_P2_CD80 -> null                                                   |
| 117             | Lymph_Node.mAPC_Int_P2_CD86 + Lymph_Node.PNT_CTLA4 <=> Lymph_Node.NEG_Sig_PNT_CD86    |
| 118             | Lymph_Node.mAPC_Int_P2_CD86 + Lymph_Node.PNT_Int_CD28 <=> Lymph_Node.POS_Sig_PNT_CD86 |
| 119             | Lymph_Node.mAPC_Int_P2_CD86 -> null                                                   |
| 120             | Lymph_Node.mAPC_Int_P2_PD1 + Lymph_Node.PD1_mab <=> Lymph_Node.PD1mAb_mAPC_PD1        |
| 121             | Lymph_Node.mAPC_Int_P2_PD1 -> null                                                    |
| 122             | Lymph_Node.mAPC_Int_P2_PDL1 -> null                                                   |
| 123             | Lymph_Node.mAPC_Int_P2_PDL2 + Lymph_Node.PNT_Int_PD1 <=> Lymph_Node.[PNT_PD1-PDL2]    |

| Reaction Number | Reaction                                                                                                                   |
|-----------------|----------------------------------------------------------------------------------------------------------------------------|
| 124             | Lymph_Node.mAPC_Int_P2_PDL2 -> null                                                                                        |
| 125             | Lymph_Node.mAPC_PD1 -> null                                                                                                |
| 126             | Lymph_Node.mAPC_PDL1 -> null                                                                                               |
| 127             | Lymph_Node.mAPC_PDL2 -> null                                                                                               |
| 128             | Lymph_Node.Naive_T -> Lymph_Node.Naive_T1                                                                                  |
| 129             | Lymph_Node.Naive_T -> null                                                                                                 |
| 130             | Lymph_Node.Naive_T1 -> Lymph_Node.Naive_T                                                                                  |
| 131             | Lymph_Node.Naive_T1 -> Lymph_Node.Primed_Naive_T                                                                           |
| 132             | Lymph_Node.NEG_Sig_PNT_CD80 -> null                                                                                        |
| 133             | Lymph_Node.NEG_Sig_PNT_CD86 -> null                                                                                        |
| 134             | Lymph_Node.NT_Int_CD28 + Lymph_Node.mAPC_Int_P1_CD80 <=> Lymph_Node.POS_Sig_NT_CD80                                        |
| 135             | Lymph_Node.NT_Int_CD28 + Lymph_Node.mAPC_Int_P1_CD86 <=> Lymph_Node.POS_Sig_NT_CD86                                        |
| 136             | Lymph_Node.NT_Int_CD28 -> null                                                                                             |
| 137             | Lymph_Node.NT1_Int1 -> Lymph_Node.NT1_Int1 + Lymph_Node.NT_Int_CD28                                                        |
| 138             | Lymph_Node.PD1_mab -> [Blood-Lymph].PD1_mabb                                                                               |
| 139             | Lymph_Node.PDL1_mab -> [Blood-Lymph].PDL1_mabb                                                                             |
| 140             | Lymph_Node.PDL1_mab + Lymph_Node.mAPC_Int_P2_PDL1 <=> Lymph_Node.[PDL1mAb-mAPC_PDL1]                                       |
| 141             | Lymph_Node.PDL1_mab + Lymph_Node.PNT_Int_PDL1 <=> Lymph_Node.[PDL1mAb-PNT_PDL1]                                            |
| 142             | Lymph_Node.PNT_CTLA4 -> null                                                                                               |
| 143             | Lymph_Node.PNT_Int_CD28 + Lymph_Node.mAPC_Int_P2_CD80 <=> Lymph_Node.POS_Sig_PNT_CD80                                      |
| 144             | Lymph_Node.PNT_Int_CD28 -> null                                                                                            |
| 145             | Lymph_Node.PNT_Int_CD80 + Lymph_Node.mAPC_Int_P2_PDL1 <=> Lymph_Node.[PNT_CD80-PDL1]                                       |
| 146             | Lymph_Node.PNT_Int_CD80 -> null                                                                                            |
| 147             | Lymph_Node.PNT_Int_PD1 + Lymph_Node.mAPC_Int_P2_PDL1 <=> Lymph_Node.[PNT_PD1-PDL1]                                         |
| 148             | Lymph_Node.PNT_Int_PD1 + Lymph_Node.PD1_mab <=> Lymph_Node.PD1mAb_PNT_PD1                                                  |
| 149             | Lymph_Node.PNT_Int_PD1 -> null                                                                                             |
| 150             | Lymph_Node.PNT_Int_PDL1 + Lymph_Node.mAPC_Int_P2_PD1 <=> Lymph_Node.[PNT_PDL1-PD1]                                         |
| 151             | Lymph_Node.PNT_Int_PDL1 -> null                                                                                            |
| 152             | Lymph_Node.PNT1_Int -> Lymph_Node.PNT_CTLA4 + Lymph_Node.PNT1_Int                                                          |
| 153             | Lymph_Node.PNT1_Int -> Lymph_Node.PNT_Int_CD28 + Lymph_Node.PNT1_Int                                                       |
| 154             | Lymph_Node.PNT1_Int -> Lymph_Node.PNT_Int_CD80 + Lymph_Node.PNT1_Int                                                       |
| 155             | Lymph_Node.PNT1_Int -> Lymph_Node.PNT1_Int + Lymph_Node.PNT_Int_PD1                                                        |
| 156             | Lymph_Node.PNT1_Int -> Lymph_Node.PNT1_Int + Lymph_Node.PNT_Int_PDL1                                                       |
| 157             | Lymph_Node.Primed_Naive_T -> Lymph_Node.Primed_Naive_T1                                                                    |
| 158             | Lymph_Node.Primed_Naive_T1 -> Lymph_Node.Anergic_Naive_T                                                                   |
| 159             | Lymph_Node.Primed_Naive_T1 -> Lymph_Node.Primed_Naive_T                                                                    |
| 160             | Lymph_Node.Primed_Naive_T1 -> Lymph_Node.Prolif_Naive_T                                                                    |
| 161             | Lymph_Node.Prolif_Naive_T -> Lymph_Node.Effector_T                                                                         |
| 162             | Lymph_Node.Prolif_Naive_T -> null                                                                                          |
| 163             | Lymph_Node.TrALN_CT_aCT -> null                                                                                            |
| 164             | Lymph_Node.TrALN_CT_CD80 -> null                                                                                           |
| 165             | Lymph_Node.TrALN_CT_CD86 -> null                                                                                           |
| 166             | Lymph_Node.TregLN -> Lymph_Node.TregLN + Lymph_Node.TrLN_CTLA4                                                             |
| 167             | Lymph_Node.TregLN + Lymph_Node.mAPC1 -> Lymph_Node.TregLN_mAPC + Lymph_Node.TregLN + Lymph_Node.mAPC1                      |
| 168             | Lymph_Node.TregLN + Lymph_Node.Naive_T2 -> Lymph_Node.[TregLN-NT] + Lymph_Node.TregLN + Lymph_Node.Naive_T2                |
| 169             | Lymph_Node.TregLN + Lymph_Node.Primed_Naive_T2 -> Lymph_Node.[TregLN-PNT] + Lymph_Node.TregLN + Lymph_Node.Primed_Naive_T2 |
| 170             | Lymph_Node.TregLN_mAPC + Lymph_Node.mAPC -> null                                                                           |
| 171             | Lymph_Node.TregLN_mAPC -> null                                                                                             |
| 172             | Lymph_Node.TregLN_mAPC1 -> Lymph_Node.[Tr-mAPC_CD80] + Lymph_Node.TregLN_mAPC1                                             |
| 173             | Lymph_Node.TregLN_mAPC1 -> Lymph_Node.[Tr-mAPC_CD86] + Lymph_Node.TregLN_mAPC1                                             |
| 174             | Lymph_Node.TregLN_mAPC1 -> Lymph_Node.[Tr-mAPC_CTLA4] + Lymph_Node.TregLN_mAPC1                                            |
| 175             | Lymph_Node.TrLN_CTLA4 + Lymph_Node.CTLA4_mab <=> Lymph_Node.TrLN_CT_aCT                                                    |
| 176             | Lymph_Node.TrLN_CTLA4 -> null                                                                                              |
| 177             | null -> [Blood-Lymph].CTLA4_mabB                                                                                           |
| 178             | null -> [Blood-Lymph].PD1_mabb                                                                                             |
| 179             | null -> [Blood-Lymph].PDL1_mabb                                                                                            |
| 180             | null -> Lymph_Node.Naive_T                                                                                                 |
| 181             | null -> Lymph_Node.Prolif_Naive_T                                                                                          |
| 182             | null -> Tumor.APC_T                                                                                                        |
| 183             | null -> Tumor.Cancer                                                                                                       |
| 184             | Peripheral.CTLA4_mabP_leaky <=> Lymph_Node.CTLA4_mab                                                                       |
| 185             | Peripheral.CTLA4_mabP_tight <=> Lymph_Node.CTLA4_mab                                                                       |

| Reaction Number | Reaction                                                                                 |
|-----------------|------------------------------------------------------------------------------------------|
| 186             | Peripheral.EffT_P_f_Vasc -> Lungs.EffT_f_LungsVasc                                       |
| 187             | Peripheral.EffT_P_f_Vasc -> null                                                         |
| 188             | Peripheral.PD1_mabP_leaky <-> Lymph_Node.PD1_mab                                         |
| 189             | Peripheral.PD1_mabP_tight <-> Lymph_Node.PD1_mab                                         |
| 190             | Peripheral.PDL1_mabP_leaky <-> Lymph_Node.PDL1_mab                                       |
| 191             | Peripheral.PDL1_mabP_tight <-> Lymph_Node.PDL1_mab                                       |
| 192             | Tumor.[C{CD80}] -> Tumor.[C{CD80}] + Tumor.[C5=CD80]                                     |
| 193             | Tumor.[C{PD1}] -> Tumor.[C2=PD1] + Tumor.[C{PD1}]                                        |
| 194             | Tumor.[C{PD1}{CD80}] -> Tumor.[C{PD1}{CD80}] + Tumor.[C9a=PD1]                           |
| 195             | Tumor.[C{PD1}{CD80}] -> Tumor.[C{PD1}{CD80}] + Tumor.[C9b=CD80]                          |
| 196             | Tumor.[C{PD1}{PDL1}] -> Tumor.[C6a=PD1] + Tumor.[C{PD1}{PDL1}]                           |
| 197             | Tumor.[C{PD1}{PDL1}] -> Tumor.[C6b=PDL1] + Tumor.[C{PD1}{PDL1}]                          |
| 198             | Tumor.[C{PD1}{PDL1}{CD80}] -> Tumor.[C{PD1}{PDL1}{CD80}] + Tumor.[C14a=PD1]              |
| 199             | Tumor.[C{PD1}{PDL1}{CD80}] -> Tumor.[C{PD1}{PDL1}{CD80}] + Tumor.[C14b=PDL1]             |
| 200             | Tumor.[C{PD1}{PDL1}{CD80}] -> Tumor.[C{PD1}{PDL1}{CD80}] + Tumor.[C14c=CD80]             |
| 201             | Tumor.[C{PD1}{PDL1}{PDL2}] -> Tumor.[C{PD1}{PDL1}{PDL2}] + Tumor.[C10a=PD1]              |
| 202             | Tumor.[C{PD1}{PDL1}{PDL2}] -> Tumor.[C{PD1}{PDL1}{PDL2}] + Tumor.[C10b=PDL1]             |
| 203             | Tumor.[C{PD1}{PDL1}{PDL2}] -> Tumor.[C{PD1}{PDL1}{PDL2}] + Tumor.[C10c=PDL2]             |
| 204             | Tumor.[C{PD1}{PDL1}{PDL2}{CD80}] -> Tumor.[C{PD1}{PDL1}{PDL2}{CD80}] + Tumor.[C16a=PD1]  |
| 205             | Tumor.[C{PD1}{PDL1}{PDL2}{CD80}] -> Tumor.[C{PD1}{PDL1}{PDL2}{CD80}] + Tumor.[C16b=PDL1] |
| 206             | Tumor.[C{PD1}{PDL1}{PDL2}{CD80}] -> Tumor.[C{PD1}{PDL1}{PDL2}{CD80}] + Tumor.[C16c=PDL2] |
| 207             | Tumor.[C{PD1}{PDL1}{PDL2}{CD80}] -> Tumor.[C{PD1}{PDL1}{PDL2}{CD80}] + Tumor.[C16d=CD80] |
| 208             | Tumor.[C{PD1}{PDL2}] -> Tumor.[C{PD1}{PDL2}] + Tumor.[C7a=PD1]                           |
| 209             | Tumor.[C{PD1}{PDL2}] -> Tumor.[C{PD1}{PDL2}] + Tumor.[C7b=PDL2]                          |
| 210             | Tumor.[C{PD1}{PDL2}{CD80}] -> Tumor.[C{PD1}{PDL2}{CD80}] + Tumor.[C15a=PD1]              |
| 211             | Tumor.[C{PDL1}{PDL2}{CD80}] -> Tumor.[C{PDL1}{PDL2}{CD80}] + Tumor.[C15b=PDL2]           |
| 212             | Tumor.[C{PD1}{PDL2}{CD80}] -> Tumor.[C{PD1}{PDL2}{CD80}] + Tumor.[C15c=CD80]             |
| 213             | Tumor.[C{PDL1}] -> Tumor.[C{PDL1}] + Tumor.[C3=PDL1]                                     |
| 214             | Tumor.[C{PDL1}{CD80}] -> Tumor.[C{PDL1}{CD80}] + Tumor.[C11a=PDL1]                       |
| 215             | Tumor.[C{PDL1}{CD80}] -> Tumor.[C{PDL1}{CD80}] + Tumor.[C11b=CD80]                       |
| 216             | Tumor.[C{PDL1}{PDL2}] -> Tumor.[C{PDL1}{PDL2}] + Tumor.[C8a=PDL1]                        |
| 217             | Tumor.[C{PDL1}{PDL2}] -> Tumor.[C{PDL1}{PDL2}] + Tumor.[C8b=PDL2]                        |
| 218             | Tumor.[C{PDL1}{PDL2}{CD80}] -> Tumor.[C{PDL1}{PDL2}{CD80}] + Tumor.[C13a=PDL1]           |
| 219             | Tumor.[C{PDL1}{PDL2}{CD80}] -> Tumor.[C{PDL1}{PDL2}{CD80}] + Tumor.[C13b=PDL2]           |
| 220             | Tumor.[C{PDL1}{PDL2}{CD80}] -> Tumor.[C{PDL1}{PDL2}{CD80}] + Tumor.[C13c=CD80]           |
| 221             | Tumor.[C{PDL2}] -> Tumor.[C{PDL2}] + Tumor.[C4=PDL2]                                     |
| 222             | Tumor.[C{PDL2}{CD80}] -> Tumor.[C{PDL2}{CD80}] + Tumor.[C12a=PDL2]                       |
| 223             | Tumor.[C{PDL2}{CD80}] -> Tumor.[C{PDL2}{CD80}] + Tumor.[C12b=CD80]                       |
| 224             | Tumor.[C10a=PD1] + Tumor.PD1_mabt <-> Tumor.[C10a=PD1:aPD1]                              |
| 225             | Tumor.[C10a=PD1] -> null                                                                 |
| 226             | Tumor.[C10b=PDL1] + Tumor.PDL1_mabt <-> Tumor.[C10b=PDL1:aPDL1]                          |
| 227             | Tumor.[C10b=PDL1] -> null                                                                |
| 228             | Tumor.[C10c=PDL2] -> null                                                                |
| 229             | Tumor.[C11a=PDL1] + Tumor.PDL1_mabt <-> Tumor.[C11a=PDL1:aPDL1]                          |
| 230             | Tumor.[C11a=PDL1] -> null                                                                |
| 231             | Tumor.[C11b=CD80] -> null                                                                |
| 232             | Tumor.[C12a=PDL2] -> null                                                                |
| 233             | Tumor.[C12b=CD80] -> null                                                                |
| 234             | Tumor.[C13a=PDL1] + Tumor.PDL1_mabt <-> Tumor.[C13a=PDL1:aPDL1]                          |
| 235             | Tumor.[C13a=PDL1] -> null                                                                |
| 236             | Tumor.[C13b=PDL2] -> null                                                                |
| 237             | Tumor.[C13c=CD80] -> null                                                                |
| 238             | Tumor.[C14a=PD1] + Tumor.[T14a=PDL1] <-> Tumor.[T14a=PDL1:PD1=C14a]                      |
| 239             | Tumor.[C14a=PD1] -> null                                                                 |
| 240             | Tumor.[C14b=PDL1] + Tumor.[T14c=CD80] <-> Tumor.[T14c=CD80:PDL1=C14b]                    |
| 241             | Tumor.[C14b=PDL1] + Tumor.PDL1_mabt <-> Tumor.[C14b=PDL1:aPDL1]                          |
| 242             | Tumor.[C14b=PDL1] -> null                                                                |
| 243             | Tumor.[C14c=CD80] + Tumor.[T14a=PDL1] <-> Tumor.[T14a=PDL1:CD80=C14c]                    |
| 244             | Tumor.[C14c=CD80] -> null                                                                |
| 245             | Tumor.[C15a=PD1] + Tumor.PD1_mabt <-> Tumor.[C15a=PD1:aPD1]                              |
| 246             | Tumor.[C15a=PD1] -> null                                                                 |
| 247             | Tumor.[C15b=PDL2] + Tumor.[T15b=PD1] <-> Tumor.[T15b=PD1:PDL2=C15b]                      |
| 248             | Tumor.[C15b=PDL2] -> null                                                                |
| 249             | Tumor.[C15c=CD80] + Tumor.[T15a=PDL1] <-> Tumor.[T15a=PDL1:CD80=C15c]                    |
| 250             | Tumor.[C15c=CD80] -> null                                                                |
| 251             | Tumor.[C16a=PD1] + Tumor.[T16a=PDL1] <-> Tumor.[T16a=PDL1:PD1=C16a]                      |

| Reaction Number | Reaction                                                                                                   |
|-----------------|------------------------------------------------------------------------------------------------------------|
| 252             | Tumor.[C16a=PD1] + Tumor.PD1_mabt <-> Tumor.[C16a=PD1:aPD1]                                                |
| 253             | Tumor.[C16a=PD1] -> null                                                                                   |
| 254             | Tumor.[C16b=PDL1] + Tumor.PDL1_mabt <-> Tumor.[C16b=PDL1:aPDL1]                                            |
| 255             | Tumor.[C16b=PDL1] -> null                                                                                  |
| 256             | Tumor.[C16c=PDL2] + Tumor.[T16b=PD1] <-> Tumor.[T16b=PD1:PDL2=C16c]                                        |
| 257             | Tumor.[C16c=PDL2] -> null                                                                                  |
| 258             | Tumor.[C16d=CD80] -> null                                                                                  |
| 259             | Tumor.[C2=PD1] -> null                                                                                     |
| 260             | Tumor.[C3=PDL1] -> null                                                                                    |
| 261             | Tumor.[C4=PDL2] -> null                                                                                    |
| 262             | Tumor.[C5=CD80] -> null                                                                                    |
| 263             | Tumor.[C6a=PD1] + Tumor.PD1_mabt <-> Tumor.[C6a=PD1:aPD1]                                                  |
| 264             | Tumor.[C6a=PD1] -> null                                                                                    |
| 265             | Tumor.[C6b=PDL1] + Tumor.[T6b=PD1] <-> Tumor.[T6b=PD1:PDL1=C6b]                                            |
| 266             | Tumor.[C6b=PDL1] + Tumor.[T6c=CD80] <-> Tumor.[T6c=CD80:PDL1=C6b]                                          |
| 267             | Tumor.[C6b=PDL1] + Tumor.PDL1_mabt <-> Tumor.[C6b=PDL1:aPDL1]                                              |
| 268             | Tumor.[C6b=PDL1] -> null                                                                                   |
| 269             | Tumor.[C7a=PD1] -> null                                                                                    |
| 270             | Tumor.[C7b=PDL2] -> null                                                                                   |
| 271             | Tumor.[C8a=PDL1] + Tumor.[T8b=CD80] <-> Tumor.[T8b=CD80:PDL1=C8a]                                          |
| 272             | Tumor.[C8a=PDL1] + Tumor.PDL1_mabt <-> Tumor.[C8a=PDL1:aPDL1]                                              |
| 273             | Tumor.[C8a=PDL1] -> null                                                                                   |
| 274             | Tumor.[C8b=PDL2] -> null                                                                                   |
| 275             | Tumor.[C9a=PD1] + Tumor.[T9=PDL1] <-> Tumor.[T9=PDL1-PD1=C9a]                                              |
| 276             | Tumor.[C9a=PD1] -> null                                                                                    |
| 277             | Tumor.[C9b=CD80] -> null                                                                                   |
| 278             | Tumor.[CTLA4:CD80_TrAT] -> null                                                                            |
| 279             | Tumor.[CTLA4:CD86_TrAT] -> null                                                                            |
| 280             | Tumor.[CTLA4_CTLA4-Trt] -> null                                                                            |
| 281             | Tumor.[T{PD1}{80}-{PDL1}{PDL2}C] -> Tumor.[T{PD1}{80}-{PDL1}{PDL2}C] + Tumor.[T8a=PD1]                     |
| 282             | Tumor.[T{PD1}{80}-{PDL1}{PDL2}C] -> Tumor.[T{PD1}{80}-{PDL1}{PDL2}C] + Tumor.[T8b=CD80]                    |
| 283             | Tumor.[T{PD1}{CD80}-{PDL1}C] -> Tumor.[T{PD1}{CD80}-{PDL1}C] + Tumor.[T3a=PD1]                             |
| 284             | Tumor.[T{PD1}{CD80}-{PDL1}C] -> Tumor.[T{PD1}{CD80}-{PDL1}C] + Tumor.[T3b=CD80]                            |
| 285             | Tumor.[T{PD1}{L1}{80}-{PD1}{80}{L1}{L2}C] -> Tumor.[T{PD1}{L1}{80}-{PD1}{80}{L1}{L2}C] + Tumor.[T16a=PDL1] |
| 286             | Tumor.[T{PD1}{L1}{80}-{PD1}{80}{L1}{L2}C] -> Tumor.[T{PD1}{L1}{80}-{PD1}{80}{L1}{L2}C] + Tumor.[T16b=PD1]  |
| 287             | Tumor.[T{PD1}{L1}{80}-{PD1}{80}{L1}{L2}C] -> Tumor.[T{PD1}{L1}{80}-{PD1}{80}{L1}{L2}C] + Tumor.[T16c=CD80] |
| 288             | Tumor.[T{PD1}{L1}{80}-{PD1}{80}{L1}C] -> Tumor.[T{PD1}{L1}{80}-{PD1}{80}{L1}C] + Tumor.[T14a=PDL1]         |
| 289             | Tumor.[T{PD1}{L1}{80}-{PD1}{80}{L1}C] -> Tumor.[T{PD1}{L1}{80}-{PD1}{80}{L1}C] + Tumor.[T14b=PD1]          |
| 290             | Tumor.[T{PD1}{L1}{80}-{PD1}{80}{L1}C] -> Tumor.[T{PD1}{L1}{80}-{PD1}{80}{L1}C] + Tumor.[T14c=CD80]         |
| 291             | Tumor.[T{PD1}{L1}{80}-{PD1}{L1}{L2}C] -> Tumor.[T{PD1}{L1}{80}-{PD1}{L1}{L2}C] + Tumor.[T10a=PDL1]         |
| 292             | Tumor.[T{PD1}{L1}{80}-{PD1}{L1}{L2}C] -> Tumor.[T{PD1}{L1}{80}-{PD1}{L1}{L2}C] + Tumor.[T10b=PD1]          |
| 293             | Tumor.[T{PD1}{L1}{80}-{PD1}{L1}{L2}C] -> Tumor.[T{PD1}{L1}{80}-{PD1}{L1}{L2}C] + Tumor.[T10c=CD80]         |
| 294             | Tumor.[T{PD1}{L1}{80}-{PD1}{L1}C] -> Tumor.[T{PD1}{L1}{80}-{PD1}{L1}C] + Tumor.[T6a=PDL1]                  |
| 295             | Tumor.[T{PD1}{L1}{80}-{PD1}{L1}C] -> Tumor.[T{PD1}{L1}{80}-{PD1}{L1}C] + Tumor.[T6b=PD1]                   |
| 296             | Tumor.[T{PD1}{L1}{80}-{PD1}{L1}C] -> Tumor.[T{PD1}{L1}{80}-{PD1}{L1}C] + Tumor.[T6c=CD80]                  |
| 297             | Tumor.[T{PD1}{L1}{80}-{PD1}{80}{PDL2}C] -> Tumor.[T{PD1}{L1}{80}-{PD1}{80}{PDL2}C] + Tumor.[T15a=PDL1]     |
| 298             | Tumor.[T{PD1}{L1}{80}-{PD1}{80}{PDL2}C] -> Tumor.[T{PD1}{L1}{80}-{PD1}{80}{PDL2}C] + Tumor.[T15b=PD1]      |
| 299             | Tumor.[T{PD1}{L1}{80}-{PD1}{L2}C] -> Tumor.[T{PD1}{L1}{80}-{PD1}{L2}C] + Tumor.[T7a=PDL1]                  |
| 300             | Tumor.[T{PD1}{L1}{80}-{PD1}{L2}C] -> Tumor.[T{PD1}{L1}{80}-{PD1}{L2}C] + Tumor.[T7b=PD1]                   |
| 301             | Tumor.[T{PD1}{L1}{80}-{PD1}{80}{L2}C] -> Tumor.[T{PD1}{L1}{80}-{PD1}{80}{L2}C] + Tumor.[T13a=PDL1]         |
| 302             | Tumor.[T{PD1}{L1}{80}-{PD1}{80}{L2}C] -> Tumor.[T{PD1}{L1}{80}-{PD1}{80}{L2}C] + Tumor.[T13b=PD1]          |
| 303             | Tumor.[T{PD1}{L1}{80}C] -> Tumor.[T{PD1}{L1}{80}C] + Tumor.[T11a=PDL1]                                     |
| 304             | Tumor.[T{PD1}{L1}{80}C] -> Tumor.[T{PD1}{L1}{80}C] + Tumor.[T11b=PD1]                                      |
| 305             | Tumor.[T{PD1}{L1}{80}C] -> Tumor.[T{PD1}{L1}{80}C] + Tumor.[T12a=PDL1]                                     |
| 306             | Tumor.[T{PD1}{L1}{80}C] -> Tumor.[T{PD1}{L1}{80}C] + Tumor.[T12b=PD1]                                      |
| 307             | Tumor.[T{PD1}{PDL2}C] -> Tumor.[T{PD1}{PDL2}C] + Tumor.[T4=PD1]                                            |
| 308             | Tumor.[T{PDL1}{CD80}{PD1}C] -> Tumor.[T{PDL1}{CD80}{PD1}C] + Tumor.[T9=PDL1]                               |
| 309             | Tumor.[T{PDL1}{CD80}C] -> Tumor.[T{PDL1}{CD80}C] + Tumor.[T5=PDL1]                                         |
| 310             | Tumor.[T{PDL1}{PD1}C] -> Tumor.[T{PDL1}{PD1}C] + Tumor.[T2=PDL1]                                           |
| 311             | Tumor.[T10a=PDL1] + Tumor.[C10a=PD1] <-> Tumor.[T10a=PDL1:PD1=C10a]                                        |
| 312             | Tumor.[T10a=PDL1] + Tumor.PDL1_mabt <-> Tumor.[T10a=PDL1:aPDL1]                                            |
| 313             | Tumor.[T10a=PDL1] -> null                                                                                  |
| 314             | Tumor.[T10b=PD1] + Tumor.[C10b=PDL1] <-> Tumor.[T10b=PD1:PDL1=C10b]                                        |
| 315             | Tumor.[T10b=PD1] + Tumor.[C10c=PDL2] <-> Tumor.[T10b=PD1:PDL2=C10c]                                        |
| 316             | Tumor.[T10b=PD1] -> null                                                                                   |

| Reaction Number | Reaction                                                              |
|-----------------|-----------------------------------------------------------------------|
| 317             | Tumor.[T10c=CD80] + Tumor.[C10b=PDL1] <-> Tumor.[T10c=CD80:PDL1=C10b] |
| 318             | Tumor.[T10c=CD80] -> null                                             |
| 319             | Tumor.[T11a=PDL1] + Tumor.[C11b=CD80] <-> Tumor.[T11a=PDL1:CD80=C11b] |
| 320             | Tumor.[T11a=PDL1] + Tumor.PDL1_mabt <-> Tumor.[T11a=PDL1:aPDL1]       |
| 321             | Tumor.[T11a=PDL1] -> null                                             |
| 322             | Tumor.[T11b=PD1] + Tumor.[C11a=PDL1] <-> Tumor.[T11b=PD1:PDL1=C11a]   |
| 323             | Tumor.[T11b=PD1] -> null                                              |
| 324             | Tumor.[T12a=PDL1] + Tumor.[C12b=CD80] <-> Tumor.[T12a=PDL1:CD80=C12b] |
| 325             | Tumor.[T12a=PDL1] + Tumor.PDL1_mabt <-> Tumor.[T12a=PDL1:aPDL1]       |
| 326             | Tumor.[T12a=PDL1] -> null                                             |
| 327             | Tumor.[T12b=PD1] + Tumor.[C12a=PDL2] <-> Tumor.[T12b=PD1:PDL2=C12a]   |
| 328             | Tumor.[T12b=PD1] -> null                                              |
| 329             | Tumor.[T13a=PDL1] + Tumor.[C13c=CD80] <-> Tumor.[T13a=PDL1:CD80=C13c] |
| 330             | Tumor.[T13a=PDL1] -> null                                             |
| 331             | Tumor.[T13b=PD1] + Tumor.[C13a=PDL1] <-> Tumor.[T13b=PD1:PDL1=C13a]   |
| 332             | Tumor.[T13b=PD1] + Tumor.[C13b=PDL2] <-> Tumor.[T13b=PD1:PDL2=C13b]   |
| 333             | Tumor.[T13b=PD1] + Tumor.PD1_mabt <-> Tumor.[T13b=PD1:aPD1]           |
| 334             | Tumor.[T13b=PD1] -> null                                              |
| 335             | Tumor.[T14a=PDL1] + Tumor.PDL1_mabt <-> Tumor.[T14a=PDL1:aPDL1]       |
| 336             | Tumor.[T14a=PDL1] -> null                                             |
| 337             | Tumor.[T14b=PD1] + Tumor.[C14b=PDL1] <-> Tumor.[T14b=PD1:PDL1=C14b]   |
| 338             | Tumor.[T14b=PD1] -> null                                              |
| 339             | Tumor.[T14c=CD80] -> null                                             |
| 340             | Tumor.[T15a=PDL1] + Tumor.[C15a=PD1] <-> Tumor.[T15a=PDL1:PD1=C15a]   |
| 341             | Tumor.[T15a=PDL1] + Tumor.PDL1_mabt <-> Tumor.[T15a=PDL1:aPDL1]       |
| 342             | Tumor.[T15a=PDL1] -> null                                             |
| 343             | Tumor.[T15b=PD1] + Tumor.PD1_mabt <-> Tumor.[T15b=PD1:aPD1]           |
| 344             | Tumor.[T15b=PD1] -> null                                              |
| 345             | Tumor.[T16a=PDL1] + Tumor.[C16d=CD80] <-> Tumor.[T16a=PDL1:CD80=C16d] |
| 346             | Tumor.[T16a=PDL1] + Tumor.PDL1_mabt <-> Tumor.[T16a=PDL1:aPDL1]       |
| 347             | Tumor.[T16a=PDL1] -> null                                             |
| 348             | Tumor.[T16b=PD1] + Tumor.[C16b=PDL1] <-> Tumor.[T16b=PD1:PDL1=C16b]   |
| 349             | Tumor.[T16b=PD1] + Tumor.PD1_mabt <-> Tumor.[T16b=PD1:aPD1]           |
| 350             | Tumor.[T16b=PD1] -> null                                              |
| 351             | Tumor.[T16c=CD80] + Tumor.[C16b=PDL1] <-> Tumor.[T16c=CD80:PDL1=C16b] |
| 352             | Tumor.[T16c=CD80] -> null                                             |
| 353             | Tumor.[T2=PDL1] + Tumor.[C2=PD1] <-> Tumor.[T2=PDL1:PD1=C2]           |
| 354             | Tumor.[T2=PDL1] -> null                                               |
| 355             | Tumor.[T3a=PD1] + Tumor.[C3=PDL1] <-> Tumor.[T3a=PD1:PDL1=C3]         |
| 356             | Tumor.[T3a=PD1] + Tumor.PD1_mabt <-> Tumor.[T3a=PD1:aPD1]             |
| 357             | Tumor.[T3a=PD1] -> null                                               |
| 358             | Tumor.[T3b=CD80] + Tumor.[C3=PDL1] <-> Tumor.[T3b=CD80:PDL1=C3]       |
| 359             | Tumor.[T3b=CD80] -> null                                              |
| 360             | Tumor.[T4=PD1] + Tumor.[C4=PDL2] <-> Tumor.[T4=PD1:PDL2=C4]           |
| 361             | Tumor.[T4=PD1] + Tumor.PD1_mabt <-> Tumor.[T4=PD1:aPD1]               |
| 362             | Tumor.[T4=PD1] -> null                                                |
| 363             | Tumor.[T5=PDL1] + Tumor.[C5=CD80] <-> Tumor.[T5=PDL1:CD80=C5]         |
| 364             | Tumor.[T5=PDL1] + Tumor.PDL1_mabt <-> Tumor.[T5=PDL1:aPDL1]           |
| 365             | Tumor.[T5=PDL1] -> null                                               |
| 366             | Tumor.[T6a=PDL1] + Tumor.[C6a=PD1] <-> Tumor.[T6a=PDL1:PD1=C6a]       |
| 367             | Tumor.[T6a=PDL1] + Tumor.PDL1_mabt <-> Tumor.[T6a=PDL1:aPDL1]         |
| 368             | Tumor.[T6a=PDL1] -> null                                              |
| 369             | Tumor.[T6b=PD1] + Tumor.PD1_mabt <-> Tumor.[T6b=PD1:aPD1]             |
| 370             | Tumor.[T6b=PD1] -> null                                               |
| 371             | Tumor.[T6c=CD80] -> null                                              |
| 372             | Tumor.[T7a=PDL1] + Tumor.[C7a=PD1] <-> Tumor.[T7a=PDL1:PD1=C7a]       |
| 373             | Tumor.[T7a=PDL1] -> null                                              |
| 374             | Tumor.[T7b=PD1] + Tumor.[C7b=PDL2] <-> Tumor.[T7b=PD1:PDL2=C7b]       |
| 375             | Tumor.[T7b=PD1] -> null                                               |
| 376             | Tumor.[T8a=PD1] + Tumor.[C8a=PDL1] <-> Tumor.[T8a=PD1:PDL1=C8a]       |
| 377             | Tumor.[T8a=PD1] + Tumor.[C8b=PDL2] <-> Tumor.[T8a=PD1:PDL2=C8b]       |
| 378             | Tumor.[T8a=PD1] -> null                                               |
| 379             | Tumor.[T8b=CD80] -> null                                              |
| 380             | Tumor.[T9=PDL1] + Tumor.[C9b=CD80] <-> Tumor.[T9=PDL1:CD80=C9b]       |
| 381             | Tumor.[T9=PDL1] + Tumor.PDL1_mabt <-> Tumor.[T9=PDL1:aPDL1]           |
| 382             | Tumor.[T9=PDL1] -> null                                               |
| 383             | Tumor.APC_T -> null                                                   |
| 384             | Tumor.C_DebrisT + Tumor.APC_T -> Tumor.mAPC_T                         |

| Reaction Number | Reaction                                                                                             |
|-----------------|------------------------------------------------------------------------------------------------------|
| 385             | Tumor.C_DebrisT -> Lymph_Node.C_DebrisLN                                                             |
| 386             | Tumor.C_DebrisT -> null                                                                              |
| 387             | Tumor.C_DebrisT -> null                                                                              |
| 388             | Tumor.C_DebrisT -> null                                                                              |
| 389             | Tumor.Cancer -> (AntSpread) Tumor.C_DebrisT                                                          |
| 390             | Tumor.CD80_mAPCT -> null                                                                             |
| 391             | Tumor.CD80_TeffT + Tumor.PDL1_TregT <=> Tumor.[PDL1:CD80_TrTeff]                                     |
| 392             | Tumor.CD80_TeffT -> null                                                                             |
| 393             | Tumor.CD80_TeffT1 -> null                                                                            |
| 394             | Tumor.CD86_mAPCT -> null                                                                             |
| 395             | Tumor.CTLA4_mabt <=> Lymph_Node.CTLA4_mab                                                            |
| 396             | Tumor.CTLA4_TregT + Tumor.CD80_mAPCT <=> Tumor.[CTLA4:CD80_TrAT]                                     |
| 397             | Tumor.CTLA4_TregT + Tumor.CD86_mAPCT <=> Tumor.[CTLA4:CD86_TrAT]                                     |
| 398             | Tumor.CTLA4_TregT + Tumor.CTLA4_mabt <=> Tumor.[CTLA4_CTLA4-Trt]                                     |
| 399             | Tumor.CTLA4_TregT -> null                                                                            |
| 400             | Tumor.Effector_TT -> null                                                                            |
| 401             | Tumor.Effector_TT -> null                                                                            |
| 402             | Tumor.Effector_TT -> Tumor.Effector_TT_Res                                                           |
| 403             | Tumor.Effector_TT_C_Eng + Tumor.Cancer1 -> Tumor.Effector_TT_C_Eng + Tumor.TC1 + Tumor.Cancer1       |
| 404             | Tumor.EffT_AR_Vasc -> null                                                                           |
| 405             | Tumor.EffT_AR_Vasc -> Tumor.Effector_TT                                                              |
| 406             | Tumor.EffT_b_Vasc -> null                                                                            |
| 407             | Tumor.EffT_b_Vasc -> Tumor.EffT_AR_Vasc                                                              |
| 408             | Tumor.EffT_b_Vasc -> Tumor.EffT_f_Vasc                                                               |
| 409             | Tumor.EffT_f_Vasc + Tumor.Tmr_Free_Sites -> Tumor.EffT_b_Vasc + Tumor.Tmr_Free_Sites                 |
| 410             | Tumor.EffT_f_Vasc -> Lungs.EffT_f_LungsVasc                                                          |
| 411             | Tumor.EffT_f_Vasc -> null                                                                            |
| 412             | Tumor.mAPC_T -> Lymph_Node.mAPC                                                                      |
| 413             | Tumor.mAPC_T -> null                                                                                 |
| 414             | Tumor.mAPC_T -> null                                                                                 |
| 415             | Tumor.mAPCT_EngTregT -> Tumor.CD80_mAPCT + Tumor.mAPCT_EngTregT                                      |
| 416             | Tumor.mAPCT_EngTregT -> Tumor.CD86_mAPCT + Tumor.mAPCT_EngTregT                                      |
| 417             | Tumor.MDSC_T + Tumor.Effector_TT_MDSCs -> Tumor.MDSCsT_Teff + Tumor.Effector_TT_MDSCs + Tumor.MDSC_T |
| 418             | Tumor.MDSCsT_EngTeff -> Tumor.PD1_MDSCsT + Tumor.MDSCsT_EngTeff                                      |
| 419             | Tumor.MDSCsT_EngTeff -> Tumor.PDL1_MDSCsT + Tumor.MDSCsT_EngTeff                                     |
| 420             | Tumor.MDSCsT_Teff + Tumor.Effector_TT -> null                                                        |
| 421             | Tumor.MDSCsT_Teff -> null                                                                            |
| 422             | Tumor.PD1_mabt <=> Lymph_Node.PD1_mab                                                                |
| 423             | Tumor.PD1_mabt + Tumor.[C14a=PD1] <=> Tumor.[C14a=PD1:aPD1]                                          |
| 424             | Tumor.PD1_mabt + Tumor.[C2=PD1] <=> Tumor.[C2=PD1:aPD1]                                              |
| 425             | Tumor.PD1_mabt + Tumor.[C7a=PD1] <=> Tumor.[C7a=PD1:aPD1]                                            |
| 426             | Tumor.PD1_mabt + Tumor.[C9a=PD1] <=> Tumor.[C9a=PD1:aPD1]                                            |
| 427             | Tumor.PD1_mabt + Tumor.[T10b=PD1] <=> Tumor.[T10b=PD1:aPD1]                                          |
| 428             | Tumor.PD1_mabt + Tumor.[T11b=PD1] <=> Tumor.[T11b=PD1:aPD1]                                          |
| 429             | Tumor.PD1_mabt + Tumor.[T12b=PD1] <=> Tumor.[T12b=PD1:aPD1]                                          |
| 430             | Tumor.PD1_mabt + Tumor.[T14b=PD1] <=> Tumor.[T14b=PD1:aPD1]                                          |
| 431             | Tumor.PD1_mabt + Tumor.[T7b=PD1] <=> Tumor.[T7b=PD1:aPD1]                                            |
| 432             | Tumor.PD1_mabt + Tumor.[T8a=PD1] <=> Tumor.[T8a=PD1:aPD1]                                            |
| 433             | Tumor.PD1_mabt + Tumor.PD1_TeffT <=> Tumor.[PD1:aPD1_Teff]                                           |
| 434             | Tumor.PD1_MDSCsT + Tumor.PD1_mabt <=> Tumor.[PD1:aPD1_MDSCs]                                         |
| 435             | Tumor.PD1_MDSCsT + Tumor.PDL1_TeffT1 <=> Tumor.[PD1:PDL1_MDSCT]                                      |
| 436             | Tumor.PD1_MDSCsT -> null                                                                             |
| 437             | Tumor.PD1_TeffT + Tumor.PDL1_TregT <=> Tumor.[PDL1:PD1_TrTeff]                                       |
| 438             | Tumor.PD1_TeffT -> null                                                                              |
| 439             | Tumor.PD1_TeffT1 + Tumor.PD1_mabt <=> Tumor.[PD1:aPD1_Teff1]                                         |
| 440             | Tumor.PD1_TeffT1 -> null                                                                             |
| 441             | Tumor.PD1_TregT + Tumor.PD1_mabt <=> Tumor.[PD1:aPD1_Treg]                                           |
| 442             | Tumor.PD1_TregT -> null                                                                              |
| 443             | Tumor.PDL1_mabt <=> Lymph_Node.PDL1_mab                                                              |
| 444             | Tumor.PDL1_mabt + Tumor.[C3=PDL1] <=> Tumor.[C3=PDL1:aPDL1]                                          |
| 445             | Tumor.PDL1_mabt + Tumor.[T13a=PDL1] <=> Tumor.[T13a=PDL1:aPDL1]                                      |
| 446             | Tumor.PDL1_mabt + Tumor.[T2=PDL1] <=> Tumor.[T2=PDL1:aPDL1]                                          |
| 447             | Tumor.PDL1_mabt + Tumor.[T7a=PDL1] <=> Tumor.[T7a=PDL1:aPDL1]                                        |
| 448             | Tumor.PDL1_mabt + Tumor.PDL1_TeffT <=> Tumor.[PDL1:aPDL1_Teff]                                       |
| 417             | Tumor.PDL1_mabt + Tumor.PDL1_TeffT1 <=> Tumor.[PDL1:aPDL1_Teff1]                                     |
| 418             | Tumor.PDL1_MDSCsT + Tumor.CD80_TeffT1 <=> Tumor.[PDL1:CD80_MDSCT]                                    |



| Reaction Number | Reaction                                                                                          |
|-----------------|---------------------------------------------------------------------------------------------------|
| 419             | Tumor.PDL1_MDSCsT + Tumor.PD1_TeffT1 <-> Tumor.[PDL1:PD1_MDSCT]                                   |
| 420             | Tumor.PDL1_MDSCsT + Tumor.PDL1_mabt <-> Tumor.[PDL1:aPDL1_MDSCs]                                  |
| 421             | Tumor.PDL1_MDSCsT -> null                                                                         |
| 422             | Tumor.PDL1_TeffT + Tumor.PD1_TregT <-> Tumor.[PD1:PDL1_TrTeff]                                    |
| 423             | Tumor.PDL1_TeffT -> null                                                                          |
| 424             | Tumor.PDL1_TeffT1 -> null                                                                         |
| 425             | Tumor.PDL1_TregT + Tumor.PDL1_mabt <-> Tumor.[PDL1:aPDL1_Treg]                                    |
| 426             | Tumor.PDL1_TregT -> null                                                                          |
| 427             | Tumor.T_Recover_Can_Dead -> null                                                                  |
| 428             | Tumor.TC1 + Tumor.Cancer -> (AntSpread) Tumor.C_DebrisT                                           |
| 429             | Tumor.TC1 -> Tumor.T_Recover_Can_Dead                                                             |
| 430             | Tumor.TC2 + Tumor.Effector_TT -> Tumor.TC2                                                        |
| 431             | Tumor.Teff_EngMDSC -> Tumor.Teff_EngMDSC + Tumor.CD80_TeffT1                                      |
| 432             | Tumor.Teff_EngMDSC -> Tumor.Teff_EngMDSC + Tumor.PD1_TeffT1                                       |
| 433             | Tumor.Teff_EngMDSC -> Tumor.Teff_EngMDSC + Tumor.PDL1_TeffT1                                      |
| 434             | Tumor.Teff_EngTregT -> Tumor.CD80_TeffT + Tumor.Teff_EngTregT                                     |
| 435             | Tumor.Teff_EngTregT -> Tumor.PD1_TeffT + Tumor.Teff_EngTregT                                      |
| 436             | Tumor.Teff_EngTregT -> Tumor.PDL1_TeffT + Tumor.Teff_EngTregT                                     |
| 437             | Tumor.TregT + Tumor.Effector_TT_TregT -> Tumor.TregT_Teff + Tumor.Effector_TT_TregT + Tumor.TregT |
| 438             | Tumor.TregT_EngAPC -> Tumor.CTLA4_TregT + Tumor.TregT_EngAPC                                      |
| 439             | Tumor.TregT_EngTeff -> Tumor.PD1_TregT + Tumor.TregT_EngTeff                                      |
| 440             | Tumor.TregT_EngTeff -> Tumor.PDL1_TregT + Tumor.TregT_EngTeff                                     |
| 441             | Tumor.TregT_Teff + Tumor.Effector_TT -> null                                                      |
| 442             | Tumor.TregT_Teff -> null                                                                          |

Table S1 – Model Reactions (End)

Table S2 – Model Reaction Rates (Start)

| Reaction Number | Reaction Rate                                                                                                                                                                |
|-----------------|------------------------------------------------------------------------------------------------------------------------------------------------------------------------------|
| 1               | $Kpa\_LNB * S\_LNB * VL * f\_LN\_CTLA4 * ([Blood-Lymph].CTLA4\_mabB / Vc\_CTLA4 - Lymph\_Node.CTLA4\_mab / VL)$                                                              |
| 2               | $0.67 * Q\_L * [Blood-Lymph].CTLA4\_mabB * (1 - Sigma1\_CTLA4) / Vc\_CTLA4 - (Peripheral.CTLA4\_mabP\_leaky / (0.35 * ISF * KP\_CTLA4)) * 0.33 * Q\_L * (1 - Sigma1\_CTLA4)$ |
| 3               | $0.33 * Q\_L * [Blood-Lymph].CTLA4\_mabB * (1 - Sigma2\_CTLA4) / Vc\_CTLA4 - (Peripheral.CTLA4\_mabP\_tight / (0.65 * ISF * KP\_CTLA4)) * 0.33 * Q\_L * (1 - Sigma2\_CTLA4)$ |
| 4               | $Kpa\_TB * S\_TB * Vt\_avg\_const * [Blood-Lymph].CTLA4\_mabB / Vc\_PD1 - Kpa\_TB * S\_TB * Vt\_avg\_const * Tumor.CTLA4\_mabt / (Vex\_Tmr)$                                 |
| 5               | $Cl\_CTLA4 * [Blood-Lymph].CTLA4\_mabB$                                                                                                                                      |
| 6               | $EffT\_Migrate * [Blood-Lymph].Effector\_T\_TB$                                                                                                                              |
| 7               | $QC\_GI * [Blood-Lymph].Effector\_TB / Vc\_Teff$                                                                                                                             |
| 8               | $(QC\_Liver - QC\_GI - QC\_Spleen + LC\_GI + LC\_Spleen) * [Blood-Lymph].Effector\_TB / Vc\_Teff$                                                                            |
| 9               | $QC\_Spleen * [Blood-Lymph].Effector\_TB / Vc\_Teff$                                                                                                                         |
| 10              | $QC\_LN * [Blood-Lymph].Effector\_TB / Vc\_Teff$                                                                                                                             |
| 11              | $EffT\_Turnover * [Blood-Lymph].Effector\_TB$                                                                                                                                |
| 12              | $QC\_Periph * [Blood-Lymph].Effector\_TB / Vc\_Teff$                                                                                                                         |
| 13              | $QC\_Tmr * TCytokineHoming * [Blood-Lymph].Effector\_TB / Vc\_Teff$                                                                                                          |
| 14              | $Kpa\_LNB * S\_LNB * VL * f\_LN\_PD1 * ([Blood-Lymph].PD1\_mabb / Vc\_PD1 - Lymph\_Node.PD1\_mab / VL)$                                                                      |
| 15              | $0.67 * Q\_L * PD1\_mabb * (1 - Sigma1\_PD1) / Vc\_PD1 - (Peripheral.PD1\_mabP\_leaky / (0.35 * ISF * KP\_PD1)) * 0.33 * Q\_L * (1 - Sigma1\_PD1)$                           |
| 16              | $0.33 * Q\_L * [Blood-Lymph].PD1\_mabb * (1 - Sigma2\_PD1) / Vc\_PD1 - (Peripheral.PD1\_mabP\_tight / (0.65 * ISF * KP\_PD1)) * 0.33 * Q\_L * (1 - Sigma2\_PD1)$             |
| 17              | $Kpa\_TB * S\_TB * Vt\_avg\_const * [Blood-Lymph].PD1\_mabb / Vc\_PD1 - Kpa\_TB * S\_TB * Vt\_avg\_const * Tumor.PD1\_mabt / (Vex\_Tmr)$                                     |
| 18              | $(Cl\_PD1 / Vc\_PD1) * [Blood-Lymph].PD1\_mabb$                                                                                                                              |
| 19              | $Kpa\_LNB * S\_LNB * VL * f\_LN\_PD1 * ([Blood-Lymph].PDL1\_mabb / Vc\_PDL1 - Lymph\_Node.PDL1\_mab / VL)$                                                                   |
| 20              | $0.67 * Q\_L * PDL1\_mabb * (1 - Sigma1\_PDL1) / Vc\_PDL1 - (Peripheral.PDL1\_mabP\_leaky / (0.35 * ISF * KP\_PDL1)) * 0.33 * Q\_L * (1 - Sigma1\_PDL1)$                     |
| 21              | $0.33 * Q\_L * [Blood-Lymph].PDL1\_mabb * (1 - Sigma2\_PDL1) / Vc\_PDL1 - (Peripheral.PDL1\_mabP\_tight / (0.65 * ISF * KP\_PDL1)) * 0.33 * Q\_L * (1 - Sigma2\_PDL1)$       |

| Reaction Number | Reaction Rate                                                                                                                                               |
|-----------------|-------------------------------------------------------------------------------------------------------------------------------------------------------------|
| 22              | $Kpa\_TB*S\_TB*Vt\_avg\_const*[Blood-Lymph].PDL1\_mabb/Vc\_PDL1 - Kpa\_TB*S\_TB*Vt\_avg\_const*Tumor.PDL1\_mabb/(Vex\_Tmr)$                                 |
| 23              | $(Cl\_PDL1/Vc\_PDL1)*[Blood-Lymph].PDL1\_mabb$                                                                                                              |
| 24              | $(Vm/Durvalumab\_MW)*[Blood-Lymph].PDL1\_mabb/(Km*Vc\_PDL1/Durvalumab\_MW+[Blood-Lymph].PDL1\_mabb)$                                                        |
| 25              | $(QC\_GI - LC\_GI)*Liv\_Spln\_GLEffT\_GI\_f\_Vasc/Vv\_GI$                                                                                                   |
| 26              | $EffT\_Turnover*Liv\_Spln\_GLEffT\_GI\_f\_Vasc$                                                                                                             |
| 27              | $J\_Liver*Liv\_Spln\_GLEffT\_Liver\_AR\_Vasc$                                                                                                               |
| 28              | $EffT\_Turnover*Liv\_Spln\_GLEffT\_Liver\_AR\_Vasc$                                                                                                         |
| 29              | $AR\_Liver*[Liv\_Spln\_GI].EffT\_Liver\_b\_Vasc$                                                                                                            |
| 30              | $kr\_Periph*Liv\_Spln\_GLEffT\_Liver\_b\_Vasc$                                                                                                              |
| 31              | $EffT\_Turnover*Liv\_Spln\_GLEffT\_Liver\_b\_Vasc$                                                                                                          |
| 32              | $(QC\_Liver - LC\_Liver)*Liv\_Spln\_GLEffT\_Liver\_f\_Vasc/Vv\_Liver$                                                                                       |
| 33              | $EffT\_Turnover*Liv\_Spln\_GLEffT\_Liver\_f\_Vasc$                                                                                                          |
| 34              | $LC\_Liver*Delta\_Liver*Liv\_Spln\_GLEffT\_LiverEx/Vext\_Liver$                                                                                             |
| 35              | $EffT\_Turnover*Liv\_Spln\_GLEffT\_LiverEx$                                                                                                                 |
| 36              | $J\_Spleen*Liv\_Spln\_GLEffT\_Spleen\_AR\_Vasc$                                                                                                             |
| 37              | $EffT\_Turnover*Liv\_Spln\_GLEffT\_Spleen\_AR\_Vasc$                                                                                                        |
| 38              | $AR\_Spleen*[Liv\_Spln\_GI].EffT\_Spleen\_b\_Vasc$                                                                                                          |
| 39              | $kr\_Periph*Liv\_Spln\_GLEffT\_Spleen\_b\_Vasc$                                                                                                             |
| 40              | $EffT\_Turnover*Liv\_Spln\_GLEffT\_Spleen\_b\_Vasc$                                                                                                         |
| 41              | $kf\_Spleen*Liv\_Spln\_GISpleen\_Free\_Sites*[Liv\_Spln\_GI].EffT\_Spleen\_f\_Vasc/Vv\_Spleen$                                                              |
| 42              | $(QC\_Spleen - LC\_Spleen)*Liv\_Spln\_GI.EffT\_Spleen\_f\_Vasc/Vv\_Spleen$                                                                                  |
| 43              | $EffT\_Turnover*Liv\_Spln\_GLEffT\_Spleen\_f\_Vasc$                                                                                                         |
| 44              | $LC\_Spleen*Delta\_Spleen*Liv\_Spln\_GLEffT\_SpleenEx/Vext\_Spleen$                                                                                         |
| 45              | $EffT\_Turnover*Liv\_Spln\_GLEffT\_SpleenEx$                                                                                                                |
| 46              | $kf\_Liver*Liver\_Free\_Sites*[Liv\_Spln\_GI].EffT\_Liver\_f\_Vasc/Vv\_Liver$                                                                               |
| 47              | $J\_Lungs*Lungs.EffT\_AR\_LungsVasc$                                                                                                                        |
| 48              | $EffT\_Turnover*Lungs.EffT\_AR\_LungsVasc$                                                                                                                  |
| 49              | $E\_Lungs*Lungs.EffT\_AR\_LungsVasc$                                                                                                                        |
| 50              | $kf\_Lungs*Lung\_Free\_Sites*Lungs.EffT\_f\_LungsVasc/Vv\_Lungs$                                                                                            |
| 51              | $(QC\_Lungs - LC\_Lungs)*Lungs.EffT\_f\_LungsVasc/Vv\_Lungs$                                                                                                |
| 52              | $EffT\_Turnover*Lungs.EffT\_f\_LungsVasc$                                                                                                                   |
| 53              | $LC\_Lungs*Delta\_Lungs*Lungs.EffT\_LungsEx/Vext\_Lungs$                                                                                                    |
| 54              | $EffT\_Turnover*Lungs.EffT\_LungsEx$                                                                                                                        |
| 55              | $AR\_Lungs*Lungs.EffT\_r\_LungsVasc$                                                                                                                        |
| 56              | $kr\_Lungs*Lungs.EffT\_r\_LungsVasc$                                                                                                                        |
| 57              | $EffT\_Turnover*Lungs.EffT\_r\_LungsVasc$                                                                                                                   |
| 58              | $E\_Lungs*Lungs.EffT\_r\_LungsVasc$                                                                                                                         |
| 59              | $[kon\_PDL1\_CD80]*Lymph\_Node.[PNT-Tr\_CD80]*Lymph\_Node.[Tr-PNT\_PDL1]/[Vol\_Cell-Rec\_Tr-PNT] - [koff\_PDL1\_CD80]*Lymph\_Node.[TrPNT\_PDL1-CD80]$       |
| 60              | $[Exp\_CD28/80/86/PD1/L1/L2]*(Lymph\_Node.[PNT-Tr\_CD80]+[TrPNT\_PDL1-CD80])$                                                                               |
| 61              | $[kon\_PD1\_PDL1]*Lymph\_Node.[PNT-Tr\_PD1]*Lymph\_Node.[Tr-PNT\_PDL1]/[Vol\_Cell-Rec\_Tr-PNT] - [koff\_PD1\_PDL1]*Lymph\_Node.[TrPNT\_PDL1-PD1]$           |
| 62              | $[kon\_PD1-PD1mAb]*Lymph\_Node.[PNT-Tr\_PD1]*Lymph\_Node.PD1\_mab/Vtdln - [koff\_PD1-PD1mAb]*Lymph\_Node.PNTTr\_PD1\_aPD1$                                  |
| 63              | $[Exp\_CD28/80/86/PD1/L1/L2]*(Lymph\_Node.[PNT-Tr\_PD1]+PNTTr\_PD1\_aPD1+[TrPNT\_PDL1-PD1])$                                                                |
| 64              | $[kon\_PDL1-PDL1mAb]*Lymph\_Node.[PNT-Tr\_PDL1]*Lymph\_Node.PDL1\_mab/Vtdln - [koff\_PDL1-PDL1mAb]*Lymph\_Node.PNTTr\_PDL1\_aPDL1$                          |
| 65              | $[Exp\_CD28/80/86/PD1/L1/L2]*(Lymph\_Node.[PNT-Tr\_PDL1]+PNTTr\_PDL1\_aPDL1+[TrPNT\_PD1-L1])$                                                               |
| 66              | $[Treg:T\_IntTime]*Lymph\_Node.[TregLN-NT]$                                                                                                                 |
| 67              | $[Treg:T\_IntTime]*Lymph\_Node.[TregLN-NT]$                                                                                                                 |
| 68              | $[Treg:T\_IntTime]*Lymph\_Node.[TregLN-PNT]*[Sig\_TrPNT=PD1/L1/CD80]$                                                                                       |
| 69              | $[Treg:T\_IntTime]*Lymph\_Node.[TregLN-PNT]*(1-[Sig\_TrPNT=PD1/L1/CD80])$                                                                                   |
| 70              | $[Exp\_CD28/80/86/PD1/L1/L2]*Lymph\_Node.[TregLN-PNT1]*((\%CD80\_receptor\_level\_PNT)*[CD80\_receptors-per-Tcell])/[Avagadro's\_Num]*(1/Tr\_per\_T\_cell)$ |
| 71              | $[Exp\_CD28/80/86/PD1/L1/L2]*Lymph\_Node.[TregLN-PNT1]*((\%PD1\_receptor\_level\_PNT)*[PD1\_receptors-per-Tcell])/[Avagadro's\_Num]*(1/Tr\_per\_T\_cell)$   |
| 72              | $[Exp\_CD28/80/86/PD1/L1/L2]*Lymph\_Node.[TregLN-PNT1]*((\%PDL1\_receptor\_level\_PNT)*[PDL1\_receptors-per-Tcell])/[Avagadro's\_Num]*(1/Tr\_per\_T\_cell)$ |
| 73              | $[Exp\_CD28/80/86/PD1/L1/L2]*Lymph\_Node.[TregLN-PNT1]*([PD1\_receptors-per-Tcell])/[Avagadro's\_Num]*(1/T\_per\_Tr\_cell)$                                 |
| 74              | $[Exp\_CD28/80/86/PD1/L1/L2]*Lymph\_Node.[TregLN-PNT1]*([PDL1\_receptors-per-Tcell])/[Avagadro's\_Num]*(1/T\_per\_Tr\_cell)$                                |
| 75              | $[Exp\_CD28/80/86/PD1/L1/L2]*(Lymph\_Node.[Tr-mAPC\_CD80]+TrALN\_CT\_CD80)$                                                                                 |
| 76              | $[Exp\_CD28/80/86/PD1/L1/L2]*(Lymph\_Node.[Tr-mAPC\_CD86]+TrALN\_CT\_CD86)$                                                                                 |
| 77              | $[kon\_CTLA4\_CD80]*Lymph\_Node.[Tr-mAPC\_CD80]*Lymph\_Node.[Tr-mAPC\_CTLA4]/[Vol\_Cell-Rec\_Tr-mAPC] - [koff\_CTLA4\_CD80]*Lymph\_Node.TrALN\_CT\_CD80$    |

| Reaction Number | Reaction Rate                                                                                                                                                     |
|-----------------|-------------------------------------------------------------------------------------------------------------------------------------------------------------------|
| 78              | $[kon\_CTLA4\_CD86]*Lymph\_Node.[Tr-mAPC\_CD86]*Lymph\_Node.[Tr-mAPC\_CTLA4]/[Vol\_Cell-Rec\_Tr-mAPC]-[koff\_CTLA4\_CD86]*Lymph\_Node.TrALN\_CT\_CD86$            |
| 79              | $kon\_CTLA4mAb\_CTLA4*Lymph\_Node.[Tr-mAPC\_CTLA4]*Lymph\_Node.CTLA4\_mab/Vtdln - [koff\_CTLA4mAb\_CTLA4]*Lymph\_Node.TrALN\_CT\_aCT$                             |
| 80              | $[Exp\_CTLA4]*(Lymph\_Node.[Tr-mAPC\_CTLA4]+[TrALN\_CT\_aCT])+[TrALN\_CT\_CD80]+[TrALN\_CT\_CD86]$                                                                |
| 81              | $[kon\_PD1\_PDL1]*Lymph\_Node.[Tr-PNT\_PD1]*Lymph\_Node.[PNT-Tr\_PDL1]/[Vol\_Cell-Rec\_Tr-PNT] - [koff\_PD1\_PDL1]*Lymph\_Node.[TrPNT\_PD1-L1]$                   |
| 82              | $[kon\_PD1-PD1mAb]*Lymph\_Node.[Tr-PNT\_PD1]*Lymph\_Node.PD1\_mab/Vtdln - [koff\_PD1-PD1mAb]*Lymph\_Node.TrPNT\_PD1\_aPD1$                                        |
| 83              | $[Exp\_CD28/80/86/PD1/L1/L2]*(Lymph\_Node.[Tr-PNT\_PD1]+TrPNT\_PD1\_aPD1+[TrPNT\_PD1-L1])$                                                                        |
| 84              | $[kon\_PDL1-PDL1mAb]*Lymph\_Node.[Tr-PNT\_PDL1]*Lymph\_Node.PDL1\_mab/Vtdln - [koff\_PDL1-PDL1mAb]*Lymph\_Node.TrPNT\_PDL1\_aPDL1$                                |
| 85              | $[Exp\_CD28/80/86/PD1/L1/L2]*(Lymph\_Node.[Tr-PNT\_PDL1]+TrPNT\_PDL1\_aPDL1+[TrPNT\_PDL1-PD1]+[TrPNT\_PDL1-CD80])$                                                |
| 86              | Phago_Debriis*Lymph_Node.APCLN*Lymph_Node.C_DebriisLN                                                                                                             |
| 87              | Debris_Decay*Lymph_Node.C_DebriisLN                                                                                                                               |
| 88              | Q_L/VL*Lymph_Node.CTLA4_mab                                                                                                                                       |
| 89              | $kon\_CTLA4mAb\_CTLA4*Lymph\_Node.CTLA4\_mab*Lymph\_Node.PNT\_CTLA4/Vtdln - [koff\_CTLA4mAb\_CTLA4]*Lymph\_Node.CTLA4\_mAb\_CTLA4$                                |
| 90              | Endo_CTLA4*Lymph_Node.CTLA4_mAb_CTLA4                                                                                                                             |
| 91              | EffT_Migrate*Lymph_Node.Effector_T                                                                                                                                |
| 92              | LC_LN*Delta_LN*Lymph_Node.EffT_LN_ExRec/Vext_LN                                                                                                                   |
| 93              | EffT_Turnover*Lymph_Node.EffT_LN_ExRec                                                                                                                            |
| 94              | $(QC\_LN - LC\_LN)*Lymph\_Node.EffT\_LN\_f\_Vasc/Vv\_LN$                                                                                                          |
| 95              | EffT_Turnover*Lymph_Node.EffT_LN_f_Vasc                                                                                                                           |
| 96              | $Exp\_All\_mAPCLN*(Lymph\_Node.mAPC*([CD80\_receptors-per-mAPC]/[Avagadro's\_Num]))$                                                                              |
| 97              | $Exp\_All\_mAPCLN*(Lymph\_Node.mAPC*([CD86\_receptors-per-mAPC]/[Avagadro's\_Num]))$                                                                              |
| 98              | $Exp\_All\_mAPCLN*Lymph\_Node.mAPC*(PD1\_receptors-per-mAPC)/[Avagadro's\_Num]$                                                                                   |
| 99              | $Exp\_All\_mAPCLN*Lymph\_Node.mAPC*(PDL1\_receptors-per-mAPC)/[Avagadro's\_Num]$                                                                                  |
| 100             | $Exp\_All\_mAPCLN*Lymph\_Node.mAPC*(PDL2\_receptors-per-mAPC)/[Avagadro's\_Num]$                                                                                  |
| 101             | kf_APC_turnover*Lymph_Node.mAPC                                                                                                                                   |
| 102             | kf_TregLNS_Inact*Lymph_Node.mAPC*CTLA4Sig_Secrete                                                                                                                 |
| 103             | Exp_All_mAPCLN*(Lymph_Node.mAPC_CD80)                                                                                                                             |
| 104             | Exp_All_mAPCLN*(Lymph_Node.mAPC_CD86)                                                                                                                             |
| 105             | $[Exp\_CD28/80/86/PD1/L1/L2]*(Lymph\_Node.mAPC\_CD80)*(Lymph\_Node.mAPC\_Int\_P1/(Lymph\_Node.mAPC+1E-100*mole))*(1/T\_cells\_per\_mAPC)$                         |
| 106             | $[Exp\_CD28/80/86/PD1/L1/L2]*(Lymph\_Node.mAPC\_CD86*(Lymph\_Node.mAPC\_Int\_P1/(Lymph\_Node.mAPC+1E-100*mole))*(1/T\_cells\_per\_mAPC)$                          |
| 107             | $[Exp\_CD28/80/86/PD1/L1/L2]*(Lymph\_Node.mAPC\_Int\_P1\_CD80 + POS\_Sig\_NT\_CD80)$                                                                              |
| 108             | $[Exp\_CD28/80/86/PD1/L1/L2]*(Lymph\_Node.mAPC\_Int\_P1\_CD86 + POS\_Sig\_NT\_CD86)$                                                                              |
| 109             | $[Exp\_CD28/80/86/PD1/L1/L2]*(Lymph\_Node.mAPC\_CD80)*(Lymph\_Node.mAPC\_Int\_P2/(Lymph\_Node.mAPC+1E-100*mole))*(1/T\_cells\_per\_mAPC)$                         |
| 110             | $[Exp\_CD28/80/86/PD1/L1/L2]*(Lymph\_Node.mAPC\_CD86*(Lymph\_Node.mAPC\_Int\_P2/(Lymph\_Node.mAPC+1E-100*mole))*(1/T\_cells\_per\_mAPC)$                          |
| 111             | $[Exp\_CD28/80/86/PD1/L1/L2]*Lymph\_Node.mAPC\_PD1*(Lymph\_Node.mAPC\_Int\_P2/(Lymph\_Node.mAPC+1E-100*mole))*(1/T\_cells\_per\_mAPC)$                            |
| 112             | $[Exp\_CD28/80/86/PD1/L1/L2]*Lymph\_Node.mAPC\_PDL1*(Lymph\_Node.mAPC\_Int\_P2/(Lymph\_Node.mAPC+1E-100*mole))*(1/T\_cells\_per\_mAPC)$                           |
| 113             | $[Exp\_CD28/80/86/PD1/L1/L2]*Lymph\_Node.mAPC\_PDL2*(Lymph\_Node.mAPC\_Int\_P2/(Lymph\_Node.mAPC+1E-100*mole))*(1/T\_cells\_per\_mAPC)$                           |
| 114             | $[kon\_CTLA4\_CD80]*Lymph\_Node.mAPC\_Int\_P2\_CD80*Lymph\_Node.PNT\_CTLA4/([Volume\_PNT-Receptor\_Int]) - [koff\_CTLA4\_CD80]*Lymph\_Node.NEG\_Sig\_PNT\_CD80$   |
| 115             | $[kon\_PDL1\_CD80]*Lymph\_Node.mAPC\_Int\_P2\_CD80*Lymph\_Node.PNT\_Int\_PDL1/[Volume\_PNT-Receptor\_Int] - [koff\_PDL1\_CD80]*Lymph\_Node.[PNT\_PDL1-CD80]$      |
| 116             | $[Exp\_CD28/80/86/PD1/L1/L2]*(Lymph\_Node.mAPC\_Int\_P2\_CD80+NEG\_Sig\_PNT\_CD80+POS\_Sig\_PNT\_CD80+[PNT\_PDL1-CD80])$                                          |
| 117             | $[kon\_CTLA4\_CD86]*Lymph\_Node.mAPC\_Int\_P2\_CD86*Lymph\_Node.PNT\_CTLA4/([Volume\_PNT-Receptor\_Int]) - [koff\_CTLA4\_CD86]*Lymph\_Node.NEG\_Sig\_PNT\_CD86$   |
| 118             | $[kon\_CD28\_CD86]*Lymph\_Node.mAPC\_Int\_P2\_CD86*Lymph\_Node.PNT\_Int\_CD28/([Volume\_PNT-Receptor\_Int]) - [koff\_CD28\_CD86]*Lymph\_Node.POS\_Sig\_PNT\_CD86$ |
| 119             | $[Exp\_CD28/80/86/PD1/L1/L2]*(Lymph\_Node.mAPC\_Int\_P2\_CD86+NEG\_Sig\_PNT\_CD86+POS\_Sig\_PNT\_CD86)$                                                           |
| 120             | $[kon\_PD1-PD1mAb]*Lymph\_Node.mAPC\_Int\_P2\_PD1*Lymph\_Node.PD1\_mab/Vtdln - [koff\_PD1-PD1mAb]*[PD1mAb\_mAPC\_PD1]$                                            |
| 121             | $[Exp\_CD28/80/86/PD1/L1/L2]*(Lymph\_Node.mAPC\_Int\_P2\_PD1+PD1mAb\_mAPC\_PD1+[PNT\_PDL1-PD1])$                                                                  |
| 122             | $[Exp\_CD28/80/86/PD1/L1/L2]*(Lymph\_Node.mAPC\_Int\_P2\_PDL1+[PDL1mAb-mAPC\_PDL1]+[PNT\_PD1-PDL1]+[PNT\_CD80-PDL1])$                                             |
| 123             | $[kon\_PD1\_PDL2]*Lymph\_Node.mAPC\_Int\_P2\_PDL2*Lymph\_Node.PNT\_Int\_PD1/[Volume\_PNT-Receptor\_Int] - [koff\_PD1\_PDL2]*Lymph\_Node.[PNT\_PD1-PDL2]$          |

| Reaction Number | Reaction Rate                                                                                                                                                                        |
|-----------------|--------------------------------------------------------------------------------------------------------------------------------------------------------------------------------------|
| 124             | [Exp_CD28/80/86/PD1/L1/L2]*(Lymph_Node.mAPC_Int_P2_PDL2+[PNT_PD1-PDL2])                                                                                                              |
| 125             | Exp_All_mAPCLN*Lymph_Node.mAPC_PD1                                                                                                                                                   |
| 126             | Exp_All_mAPCLN*Lymph_Node.mAPC_PDL1                                                                                                                                                  |
| 127             | Exp_All_mAPCLN*Lymph_Node.mAPC_PDL2                                                                                                                                                  |
| 128             | PrimeNT_rate*Lymph_Node.Naive_T*[Prob_NT-mAPC_Interact]*[Sig_NT=CD28]                                                                                                                |
| 129             | EffT_InOutLN*Lymph_Node.Naive_T                                                                                                                                                      |
| 130             | PrimeNT1_rate*Lymph_Node.Naive_T1*(1/Antigen_Intensity)*((mAPC_Int_P1)/(mAPC_Int_P1+Naive_T1*mAPC50_per_T_cell+0.001*mole))                                                          |
| 131             | PrimeNT1_rate*Lymph_Node.Naive_T1*Antigen_Intensity*((mAPC_Int_P1)/(mAPC_Int_P1+Naive_T1*mAPC50_per_T_cell+0.001*mole))                                                              |
| 132             | Endo_CTLA4*Lymph_Node.NEG_Sig_PNT_CD80                                                                                                                                               |
| 133             | Endo_CTLA4*Lymph_Node.NEG_Sig_PNT_CD86                                                                                                                                               |
| 134             | [kon_CD28_CD80]*Lymph_Node.NT_Int_CD28*Lymph_Node.mAPC_Int_P1_CD80/[Volume_NT-Receptor_Int] - [koff_CD28_CD80]*Lymph_Node.POS_Sig_NT_CD80                                            |
| 135             | [kon_CD28_CD86]*Lymph_Node.NT_Int_CD28*Lymph_Node.mAPC_Int_P1_CD86/[Volume_NT-Receptor_Int] - [koff_CD28_CD86]*Lymph_Node.POS_Sig_NT_CD86                                            |
| 136             | [Exp_CD28/80/86/PD1/L1/L2]*(Lymph_Node.NT_Int_CD28+POS_Sig_NT_CD80+POS_Sig_NT_CD86)                                                                                                  |
| 137             | [Exp_CD28/80/86/PD1/L1/L2]*(((CD28_receptors-per-Tcell)/[Avagadro's_Num]))*(mAPC_Int_P1/(mAPC_per_T_cell))                                                                           |
| 138             | Q_L/VL*Lymph_Node.PD1_mab                                                                                                                                                            |
| 139             | Q_L/VL*Lymph_Node.PDL1_mab                                                                                                                                                           |
| 140             | [kon_PDL1-PDL1mAb]*Lymph_Node.PDL1_mab*Lymph_Node.mAPC_Int_P2_PDL1/Vtdln - [koff_PDL1-PDL1mAb]*Lymph_Node.[PDL1mAb-mAPC_PDL1]                                                        |
| 141             | [kon_PDL1-PDL1mAb]*Lymph_Node.PDL1_mab*Lymph_Node.PNT_Int_PDL1/Vtdln - [koff_PDL1-PDL1mAb]*Lymph_Node.[PDL1mAb-PNT_PDL1]                                                             |
| 142             | [Exp_CTLA4]*(Lymph_Node.PNT_CTLA4+NEG_Sig_PNT_CD80+[NEG_Sig_PNT_CD86]+[CTLA4_mAb_CTLA4])                                                                                             |
| 143             | [kon_CD28_CD80]*Lymph_Node.PNT_Int_CD28*Lymph_Node.mAPC_Int_P2_CD80/([Volume_PNT-Receptor_Int]) - [koff_CD28_CD80]*Lymph_Node.POS_Sig_PNT_CD80                                       |
| 144             | [Exp_CD28/80/86/PD1/L1/L2]*(Lymph_Node.PNT_Int_CD28+POS_Sig_PNT_CD80+POS_Sig_PNT_CD86)                                                                                               |
| 145             | [kon_PDL1_CD80]*Lymph_Node.PNT_Int_CD80*Lymph_Node.mAPC_Int_P2_PDL1/[Volume_PNT-Receptor_Int] - [koff_PDL1_CD80]*Lymph_Node.[PNT_CD80-PDL1]                                          |
| 146             | [Exp_CD28/80/86/PD1/L1/L2]*(Lymph_Node.PNT_Int_CD80+[PNT_CD80-PDL1])                                                                                                                 |
| 147             | [kon_PD1_PDL1]*Lymph_Node.PNT_Int_PD1*Lymph_Node.mAPC_Int_P2_PDL1/[Volume_PNT-Receptor_Int] - [koff_PD1_PDL1]*Lymph_Node.[PNT_PD1-PDL1]                                              |
| 148             | [kon_PD1-PD1mAb]*Lymph_Node.PNT_Int_PD1*Lymph_Node.PD1_mab/Vtdln-[koff_PD1-PD1mAb]*[PD1mAb_PNT_PD1]                                                                                  |
| 149             | [Exp_CD28/80/86/PD1/L1/L2]*(Lymph_Node.PNT_Int_PD1+PD1mAb_PNT_PD1+[PNT_PD1-PDL2]+[PNT_PD1-PDL1])                                                                                     |
| 150             | [kon_PD1_PDL1]*Lymph_Node.PNT_Int_PDL1*Lymph_Node.mAPC_Int_P2_PD1/[Volume_PNT-Receptor_Int] - [koff_PD1_PDL1]*Lymph_Node.[PNT_PDL1-PD1]                                              |
| 151             | [Exp_CD28/80/86/PD1/L1/L2]*(Lymph_Node.PNT_Int_PDL1+[PDL1mAb-PNT_PDL1]+[PNT_PDL1-CD80]+[PNT_PDL1-PD1])                                                                               |
| 152             | [Exp_CTLA4]*(((CTLA4_receptors-Int-PNT)/[Avagadro's_Num]))*(mAPC_Int_P2/(mAPC_per_T_cell))                                                                                           |
| 153             | [Exp_CD28/80/86/PD1/L1/L2]*(((CD28_receptors-per-Tcell)/[Avagadro's_Num]))*(mAPC_Int_P2/(mAPC_per_T_cell))                                                                           |
| 154             | [Exp_CD28/80/86/PD1/L1/L2]*(((%CD80_receptor_level_PNT)*[CD80_receptors-per-Tcell])/[Avagadro's_Num]))*(mAPC_Int_P2/(mAPC_per_T_cell))                                               |
| 155             | [Exp_CD28/80/86/PD1/L1/L2]*(((%PD1_receptor_level_PNT)*[PD1_receptors-per-Tcell])/[Avagadro's_Num]))*(mAPC_Int_P2/(mAPC_per_T_cell))                                                 |
| 156             | [Exp_CD28/80/86/PD1/L1/L2]*(((%PDL1_receptor_level_PNT)*[PDL1_receptors-per-Tcell])/[Avagadro's_Num]))*(mAPC_Int_P2/(mAPC_per_T_cell))                                               |
| 157             | kf_Phase2P*Lymph_Node.Primed_Naive_T*[Prob_PNT-mAPC_Interact]                                                                                                                        |
| 158             | kf_no_prolif*Lymph_Node.Primed_Naive_T1*[Sig_PNT=CTLA4/PD1/L1/CD80]                                                                                                                  |
| 159             | PrimeTLN2_rate*Lymph_Node.Primed_Naive_T1*(1/Antigen_Intensity)*((mAPC_Int_P2)/(mAPC_Int_P2+Primed_Naive_T1*mAPC50_per_T_cell+0.001*mole))                                           |
| 160             | PrimeTLN2_rate*Lymph_Node.Primed_Naive_T1*(1-[Sig_PNT=CTLA4/PD1/L1/CD80])*Antigen_Intensity*((mAPC_Int_P2)/(mAPC_Int_P2 +Primed_Naive_T1*mAPC50_per_T_cell +0.001*mole))             |
| 161             | kf_Prolif_end*Lymph_Node.Prolif_Naive_T                                                                                                                                              |
| 162             | Lymph_Node.Prolif_Naive_T*[Prolif_Thresh]                                                                                                                                            |
| 163             | Endo_CTLA4*Lymph_Node.TrALN_CT_aCT                                                                                                                                                   |
| 164             | Endo_CTLA4*Lymph_Node.TrALN_CT_CD80                                                                                                                                                  |
| 165             | Endo_CTLA4*Lymph_Node.TrALN_CT_CD86                                                                                                                                                  |
| 166             | [Exp_CTLA4]*Lymph_Node.TregLN*([CTLA4_receptors-Tr]/[Avagadro's_Num])                                                                                                                |
| 167             | TregLN_Engage*Lymph_Node.mAPC1*((Lymph_Node.TregLN/(Lymph_Node.mAPC1 + 1E-100*mole))^gamma_TC_Assoc)/(s_Assoc + (Lymph_Node.TregLN/(Lymph_Node.mAPC1 + 1E-100*mole))^gamma_TC_Assoc) |

| Reaction Number | Reaction Rate                                                                                                                                                                                                                                                                                                                                      |
|-----------------|----------------------------------------------------------------------------------------------------------------------------------------------------------------------------------------------------------------------------------------------------------------------------------------------------------------------------------------------------|
| 168             | $\text{TregLN\_Engage} * \text{Lymph\_Node.Naive\_T2} * ((\text{Lymph\_Node.TregLN} / (\text{Lymph\_Node.Naive\_T2} + 1\text{E-}100 * \text{mole}))^{\text{gamma\_TC\_Assoc}} / (\text{s\_Assoc} + (\text{Lymph\_Node.TregLN} / (\text{Lymph\_Node.Naive\_T2} + 1\text{E-}100 * \text{mole}))^{\text{gamma\_TC\_Assoc}}))$                         |
| 169             | $\text{TregLN\_Engage} * \text{Lymph\_Node.Primed\_Naive\_T2} * ((\text{Lymph\_Node.TregLN} / (\text{Lymph\_Node.Primed\_Naive\_T2} + 1\text{E-}100 * \text{mole}))^{\text{gamma\_TC\_Assoc}} / (\text{s\_Assoc} + (\text{Lymph\_Node.TregLN} / (\text{Lymph\_Node.Primed\_Naive\_T2} + 1\text{E-}100 * \text{mole}))^{\text{gamma\_TC\_Assoc}}))$ |
| 170             | $[\text{Treg:mAPC\_IntTime}] * \text{Lymph\_Node.TregLN\_mAPC} * (1 - [\text{CTLA4Sig\_TrLN-mAPC}])$                                                                                                                                                                                                                                               |
| 171             | $[\text{Treg:mAPC\_IntTime}] * \text{Lymph\_Node.TregLN\_mAPC} * ([\text{CTLA4Sig\_TrLN-mAPC}])$                                                                                                                                                                                                                                                   |
| 172             | $[\text{Exp\_CD28/80/86/PD1/L1/L2}] * \text{Lymph\_Node.TregLN\_mAPC1} * ((\text{CD80\_receptors-per-mAPC}) / [\text{Avagadro's\_Num}]) * (1 / \text{Tr\_cells\_per\_mAPC})$                                                                                                                                                                       |
| 173             | $[\text{Exp\_CD28/80/86/PD1/L1/L2}] * \text{Lymph\_Node.TregLN\_mAPC1} * ((\text{CD86\_receptors-per-mAPC}) / [\text{Avagadro's\_Num}]) * (1 / \text{Tr\_cells\_per\_mAPC})$                                                                                                                                                                       |
| 174             | $[\text{Exp\_CTLA4}] * \text{Lymph\_Node.TregLN\_mAPC1} * ([\text{CTLA4\_receptors-Tr}] / [\text{Avagadro's\_Num}]) * (1 / \text{mAPC\_per\_Tr\_cell})$                                                                                                                                                                                            |
| 175             | $\text{kon\_CTLA4mAb\_CTLA4} * \text{Lymph\_Node.TrLN\_CTLA4} * \text{Lymph\_Node.CTLA4\_mab} / \text{Vtdln} - \text{koff\_CTLA4mAb\_CTLA4} * \text{Lymph\_Node.TrLN\_CT\_aCT}$                                                                                                                                                                    |
| 176             | $[\text{Exp\_CTLA4}] * (\text{Lymph\_Node.TrLN\_CTLA4} + [\text{TrLN\_CT\_aCT}])$                                                                                                                                                                                                                                                                  |
| 177             | $(\text{k\_DoseAdmin\_AntiCTLA4} * [\text{BodyWeight (kg)}] * \text{CTLA4mAb}) / (\text{Ipilimumab\_MW})$                                                                                                                                                                                                                                          |
| 178             | $([\text{BodyWeight (kg)}] * \text{PD1mAb}) / (\text{Nivolumab\_MW}) / \text{T\_IVinject}$                                                                                                                                                                                                                                                         |
| 179             | $(\text{k\_DoseAdmin\_AntiPDL1} * [\text{BodyWeight (kg)}] * \text{PDL1mAb}) / (\text{Durvalumab\_MW})$                                                                                                                                                                                                                                            |
| 180             | $\text{EffT\_InOutLN} * \text{Lymph\_Node.Naive\_T0}$                                                                                                                                                                                                                                                                                              |
| 181             | $\text{Lymph\_Node.Prolif\_Naive\_T} * [\text{Prolif\_Fract}]$                                                                                                                                                                                                                                                                                     |
| 182             | $\text{kf\_Monocytes\_intoT} * \text{Monocytes}$                                                                                                                                                                                                                                                                                                   |
| 183             | $\text{Rate\_Tumor\_Growth} * \text{Tumor.Cancer}$                                                                                                                                                                                                                                                                                                 |
| 184             | $(\text{Peripheral.CTLA4\_mabP\_leaky} / (0.35 * \text{ISF} * \text{KP\_PD1})) * 0.67 * \text{Q\_L} * (1 - \text{SigmaL}) - \text{Lymph\_Node.CTLA4\_mab} * 0.67 * \text{Q\_L} * (1 - \text{SigmaL}) / \text{VL}$                                                                                                                                  |
| 185             | $(\text{Peripheral.CTLA4\_mabP\_tight} / (0.65 * \text{ISF} * \text{KP\_PD1})) * 0.33 * \text{Q\_L} * (1 - \text{SigmaL}) - \text{Lymph\_Node.CTLA4\_mab} * 0.33 * \text{Q\_L} * (1 - \text{SigmaL}) / \text{VL}$                                                                                                                                  |
| 186             | $(\text{QC\_Periph} - \text{LC\_Periph}) * \text{Peripheral.EffT\_P\_f\_Vasc} / \text{Vv\_Periph}$                                                                                                                                                                                                                                                 |
| 187             | $\text{EffT\_Turnover} * \text{Peripheral.EffT\_P\_f\_Vasc}$                                                                                                                                                                                                                                                                                       |
| 188             | $(\text{Peripheral.PD1\_mabP\_leaky} / (0.35 * \text{ISF} * \text{KP\_PD1})) * 0.67 * \text{Q\_L} * (1 - \text{SigmaL}) - \text{Lymph\_Node.PD1\_mab} * 0.67 * \text{Q\_L} * (1 - \text{SigmaL}) / \text{VL}$                                                                                                                                      |
| 189             | $(\text{Peripheral.PD1\_mabP\_tight} / (0.65 * \text{ISF} * \text{KP\_PD1})) * 0.33 * \text{Q\_L} * (1 - \text{SigmaL}) - \text{Lymph\_Node.PD1\_mab} * 0.33 * \text{Q\_L} * (1 - \text{SigmaL}) / \text{VL}$                                                                                                                                      |
| 190             | $(\text{Peripheral.PDL1\_mabP\_leaky} / (0.35 * \text{ISF} * \text{KP\_PDL1})) * 0.67 * \text{Q\_L} * (1 - \text{SigmaL}) - \text{Lymph\_Node.PDL1\_mab} * 0.67 * \text{Q\_L} * (1 - \text{SigmaL}) / \text{VL}$                                                                                                                                   |
| 191             | $(\text{Peripheral.PDL1\_mabP\_tight} / (0.65 * \text{ISF} * \text{KP\_PDL1})) * 0.33 * \text{Q\_L} * (1 - \text{SigmaL}) - \text{Lymph\_Node.PDL1\_mab} * 0.33 * \text{Q\_L} * (1 - \text{SigmaL}) / \text{VL}$                                                                                                                                   |
| 192             | $[\text{Exp\_CD28/80/86/PD1/L1/L2}] * \text{Tumor.[C\{CD80\}] * ((\text{CD80\_receptors\_per\_C\_CI}) / [\text{Avagadro's\_Num}]) * ((\text{T\_per\_Cancer\_Cell\_Int}) / [\text{T\_per\_Cancer\_Cell\_max}])$                                                                                                                                     |
| 193             | $[\text{Exp\_CD28/80/86/PD1/L1/L2}] * \text{Tumor.[C\{PD1\}] * ((\text{PD1\_receptors\_per\_C\_CI}) / [\text{Avagadro's\_Num}]) * ((\text{T\_per\_Cancer\_Cell\_Int}) / [\text{T\_per\_Cancer\_Cell\_max}])$                                                                                                                                       |
| 194             | $[\text{Exp\_CD28/80/86/PD1/L1/L2}] * \text{Tumor.[C\{PD1\}\{CD80\}] * ((\text{PD1\_receptors\_per\_C\_CI}) / [\text{Avagadro's\_Num}]) * ((\text{T\_per\_Cancer\_Cell\_Int}) / [\text{T\_per\_Cancer\_Cell\_max}])$                                                                                                                               |
| 195             | $[\text{Exp\_CD28/80/86/PD1/L1/L2}] * \text{Tumor.[C\{PD1\}\{CD80\}] * ((\text{CD80\_receptors\_per\_C\_CI}) / [\text{Avagadro's\_Num}]) * ((\text{T\_per\_Cancer\_Cell\_Int}) / [\text{T\_per\_Cancer\_Cell\_max}])$                                                                                                                              |
| 196             | $[\text{Exp\_CD28/80/86/PD1/L1/L2}] * \text{Tumor.[C\{PD1\}\{PDL1\}] * ((\text{PD1\_receptors\_per\_C\_CI}) / [\text{Avagadro's\_Num}]) * ((\text{T\_per\_Cancer\_Cell\_Int}) / [\text{T\_per\_Cancer\_Cell\_max}])$                                                                                                                               |
| 197             | $[\text{Exp\_CD28/80/86/PD1/L1/L2}] * \text{Tumor.[C\{PD1\}\{PDL1\}] * ((\text{PDL1\_receptors\_per\_C\_CI}) / [\text{Avagadro's\_Num}]) * ((\text{T\_per\_Cancer\_Cell\_Int}) / [\text{T\_per\_Cancer\_Cell\_max}])$                                                                                                                              |
| 198             | $[\text{Exp\_CD28/80/86/PD1/L1/L2}] * \text{Tumor.[C\{PD1\}\{PDL1\}\{CD80\}] * ((\text{PD1\_receptors\_per\_C\_CI}) / [\text{Avagadro's\_Num}]) * ((\text{T\_per\_Cancer\_Cell\_Int}) / [\text{T\_per\_Cancer\_Cell\_max}])$                                                                                                                       |
| 199             | $[\text{Exp\_CD28/80/86/PD1/L1/L2}] * \text{Tumor.[C\{PD1\}\{PDL1\}\{CD80\}] * ((\text{PDL1\_receptors\_per\_C\_CI}) / [\text{Avagadro's\_Num}]) * ((\text{T\_per\_Cancer\_Cell\_Int}) / [\text{T\_per\_Cancer\_Cell\_max}])$                                                                                                                      |
| 200             | $[\text{Exp\_CD28/80/86/PD1/L1/L2}] * \text{Tumor.[C\{PD1\}\{PDL1\}\{CD80\}] * ((\text{CD80\_receptors\_per\_C\_CI}) / [\text{Avagadro's\_Num}]) * ((\text{T\_per\_Cancer\_Cell\_Int}) / [\text{T\_per\_Cancer\_Cell\_max}])$                                                                                                                      |
| 201             | $[\text{Exp\_CD28/80/86/PD1/L1/L2}] * \text{Tumor.[C\{PD1\}\{PDL1\}\{PDL2\}] * ((\text{PD1\_receptors\_per\_C\_CI}) / [\text{Avagadro's\_Num}]) * ((\text{T\_per\_Cancer\_Cell\_Int}) / [\text{T\_per\_Cancer\_Cell\_max}])$                                                                                                                       |
| 202             | $[\text{Exp\_CD28/80/86/PD1/L1/L2}] * \text{Tumor.[C\{PD1\}\{PDL1\}\{PDL2\}] * ((\text{PDL1\_receptors\_per\_C\_CI}) / [\text{Avagadro's\_Num}]) * ((\text{T\_per\_Cancer\_Cell\_Int}) / [\text{T\_per\_Cancer\_Cell\_max}])$                                                                                                                      |
| 203             | $[\text{Exp\_CD28/80/86/PD1/L1/L2}] * \text{Tumor.[C\{PD1\}\{PDL1\}\{PDL2\}] * ((\text{PDL2\_receptors\_per\_C\_CI}) / [\text{Avagadro's\_Num}]) * ((\text{T\_per\_Cancer\_Cell\_Int}) / [\text{T\_per\_Cancer\_Cell\_max}])$                                                                                                                      |
| 204             | $[\text{Exp\_CD28/80/86/PD1/L1/L2}] * \text{Tumor.[C\{PD1\}\{PDL1\}\{PDL2\}\{CD80\}] * ((\text{PD1\_receptors\_per\_C\_CI}) / [\text{Avagadro's\_Num}]) * ((\text{T\_per\_Cancer\_Cell\_Int}) / [\text{T\_per\_Cancer\_Cell\_max}])$                                                                                                               |
| 205             | $[\text{Exp\_CD28/80/86/PD1/L1/L2}] * \text{Tumor.[C\{PD1\}\{PDL1\}\{PDL2\}\{CD80\}] * ((\text{PDL1\_receptors\_per\_C\_CI}) / [\text{Avagadro's\_Num}]) * ((\text{T\_per\_Cancer\_Cell\_Int}) / [\text{T\_per\_Cancer\_Cell\_max}])$                                                                                                              |
| 206             | $[\text{Exp\_CD28/80/86/PD1/L1/L2}] * \text{Tumor.[C\{PD1\}\{PDL1\}\{PDL2\}\{CD80\}] * ((\text{PDL2\_receptors\_per\_C\_CI}) / [\text{Avagadro's\_Num}]) * ((\text{T\_per\_Cancer\_Cell\_Int}) / [\text{T\_per\_Cancer\_Cell\_max}])$                                                                                                              |

| Reaction Number | Reaction Rate                                                                                                                                                                      |
|-----------------|------------------------------------------------------------------------------------------------------------------------------------------------------------------------------------|
| 207             | $[Exp\_CD28/80/86/PD1/L1/L2]*Tumor.[C\{PD1\}\{PDL1\}\{PDL2\}\{CD80\}]*([CD80\_receptors\_per\_C\_CI]/[Avagadro's\_Num])*((T\_per\_Cancer\_Cell\_Int]/[T\_per\_Cancer\_Cell\_max])$ |
| 208             | $[Exp\_CD28/80/86/PD1/L1/L2]*Tumor.[C\{PD1\}\{PDL2\}]*([PD1\_receptors\_per\_C\_CI]/[Avagadro's\_Num])*((T\_per\_Cancer\_Cell\_Int]/[T\_per\_Cancer\_Cell\_max])$                  |
| 209             | $[Exp\_CD28/80/86/PD1/L1/L2]*Tumor.[C\{PD1\}\{PDL2\}]*([PDL2\_receptors\_per\_C\_CI]/[Avagadro's\_Num])*((T\_per\_Cancer\_Cell\_Int]/[T\_per\_Cancer\_Cell\_max])$                 |
| 210             | $[Exp\_CD28/80/86/PD1/L1/L2]*Tumor.[C\{PD1\}\{PDL2\}\{CD80\}]*([PD1\_receptors\_per\_C\_CI]/[Avagadro's\_Num])*((T\_per\_Cancer\_Cell\_Int]/[T\_per\_Cancer\_Cell\_max])$          |
| 211             | $[Exp\_CD28/80/86/PD1/L1/L2]*Tumor.[C\{PD1\}\{PDL2\}\{CD80\}]*([PDL2\_receptors\_per\_C\_CI]/[Avagadro's\_Num])*((T\_per\_Cancer\_Cell\_Int]/[T\_per\_Cancer\_Cell\_max])$         |
| 212             | $[Exp\_CD28/80/86/PD1/L1/L2]*Tumor.[C\{PD1\}\{PDL2\}\{CD80\}]*([CD80\_receptors\_per\_C\_CI]/[Avagadro's\_Num])*((T\_per\_Cancer\_Cell\_Int]/[T\_per\_Cancer\_Cell\_max])$         |
| 213             | $[Exp\_CD28/80/86/PD1/L1/L2]*Tumor.[C\{PDL1\}]*([PDL1\_receptors\_per\_C\_CI]/[Avagadro's\_Num])*((T\_per\_Cancer\_Cell\_Int]/[T\_per\_Cancer\_Cell\_max])$                        |
| 214             | $[Exp\_CD28/80/86/PD1/L1/L2]*Tumor.[C\{PDL1\}\{CD80\}]*([PDL1\_receptors\_per\_C\_CI]/[Avagadro's\_Num])*((T\_per\_Cancer\_Cell\_Int]/[T\_per\_Cancer\_Cell\_max])$                |
| 215             | $[Exp\_CD28/80/86/PD1/L1/L2]*Tumor.[C\{PDL1\}\{CD80\}]*([CD80\_receptors\_per\_C\_CI]/[Avagadro's\_Num])*((T\_per\_Cancer\_Cell\_Int]/[T\_per\_Cancer\_Cell\_max])$                |
| 216             | $[Exp\_CD28/80/86/PD1/L1/L2]*Tumor.[C\{PDL1\}\{PDL2\}]*([PDL1\_receptors\_per\_C\_CI]/[Avagadro's\_Num])*((T\_per\_Cancer\_Cell\_Int]/[T\_per\_Cancer\_Cell\_max])$                |
| 217             | $[Exp\_CD28/80/86/PD1/L1/L2]*Tumor.[C\{PDL1\}\{PDL2\}]*([PDL2\_receptors\_per\_C\_CI]/[Avagadro's\_Num])*((T\_per\_Cancer\_Cell\_Int]/[T\_per\_Cancer\_Cell\_max])$                |
| 218             | $[Exp\_CD28/80/86/PD1/L1/L2]*Tumor.[C\{PDL1\}\{PDL2\}\{CD80\}]*([PDL1\_receptors\_per\_C\_CI]/[Avagadro's\_Num])*((T\_per\_Cancer\_Cell\_Int]/[T\_per\_Cancer\_Cell\_max])$        |
| 219             | $[Exp\_CD28/80/86/PD1/L1/L2]*Tumor.[C\{PDL1\}\{PDL2\}\{CD80\}]*([PDL2\_receptors\_per\_C\_CI]/[Avagadro's\_Num])*((T\_per\_Cancer\_Cell\_Int]/[T\_per\_Cancer\_Cell\_max])$        |
| 220             | $[Exp\_CD28/80/86/PD1/L1/L2]*Tumor.[C\{PDL1\}\{PDL2\}\{CD80\}]*([CD80\_receptors\_per\_C\_CI]/[Avagadro's\_Num])*((T\_per\_Cancer\_Cell\_Int]/[T\_per\_Cancer\_Cell\_max])$        |
| 221             | $[Exp\_CD28/80/86/PD1/L1/L2]*Tumor.[C\{PDL2\}]*([PDL2\_receptors\_per\_C\_CI]/[Avagadro's\_Num])*((T\_per\_Cancer\_Cell\_Int]/[T\_per\_Cancer\_Cell\_max])$                        |
| 222             | $[Exp\_CD28/80/86/PD1/L1/L2]*Tumor.[C\{PDL2\}\{CD80\}]*([PDL2\_receptors\_per\_C\_CI]/[Avagadro's\_Num])*((T\_per\_Cancer\_Cell\_Int]/[T\_per\_Cancer\_Cell\_max])$                |
| 223             | $[Exp\_CD28/80/86/PD1/L1/L2]*Tumor.[C\{PDL2\}\{CD80\}]*([CD80\_receptors\_per\_C\_CI]/[Avagadro's\_Num])*((T\_per\_Cancer\_Cell\_Int]/[T\_per\_Cancer\_Cell\_max])$                |
| 224             | $[kon\_PD1-PD1mAb]*Tumor.[C10a=PD1]*Tumor.PD1\_mabt/Vt - [koff\_PD1-PD1mAb]*Tumor.[C10a=PD1:aPD1]$                                                                                 |
| 225             | $[Exp\_CD28/80/86/PD1/L1/L2]*Tumor.[C10a=PD1]+[C10a=PD1:aPD1]+[T10a=PDL1:PD1=C10a]$                                                                                                |
| 226             | $[kon\_PDL1-PDL1mAb]*Tumor.[C10b=PDL1]*Tumor.PDL1\_mabt/Vt - [koff\_PDL1-PDL1mAb]*Tumor.[C10b=PDL1:aPDL1]$                                                                         |
| 227             | $[Exp\_CD28/80/86/PD1/L1/L2]*Tumor.[C10b=PDL1]+[C10b=PDL1:aPDL1]+ [T10b=PD1:PDL1=C10b]+ [T10c=CD80:PDL1=C10b]$                                                                     |
| 228             | $[Exp\_CD28/80/86/PD1/L1/L2]*Tumor.[C10c=PDL2] + [T10b=PD1:PDL2=C10c]$                                                                                                             |
| 229             | $[kon\_PDL1-PDL1mAb]*Tumor.[C11a=PDL1]*Tumor.PDL1\_mabt/Vt - [koff\_PDL1-PDL1mAb]*Tumor.[C11a=PDL1:aPDL1]$                                                                         |
| 230             | $[Exp\_CD28/80/86/PD1/L1/L2]*Tumor.[C11a=PDL1]+[C11a=PDL1:aPDL1]+ [T11b=PD1:PDL1=C11a]$                                                                                            |
| 231             | $[Exp\_CD28/80/86/PD1/L1/L2]*Tumor.[C11b=CD80]+ [T11a=PDL1:CD80=C11b]$                                                                                                             |
| 232             | $[Exp\_CD28/80/86/PD1/L1/L2]*Tumor.[C12a=PDL2]+ [T12b=PD1:PDL2=C12a]$                                                                                                              |
| 233             | $[Exp\_CD28/80/86/PD1/L1/L2]*Tumor.[C12b=CD80]+ [T12a=PDL1:CD80=C12b]$                                                                                                             |
| 234             | $[kon\_PDL1-PDL1mAb]*Tumor.[C13a=PDL1]*Tumor.PDL1\_mabt/Vt - [koff\_PDL1-PDL1mAb]*Tumor.[C13a=PDL1:aPDL1]$                                                                         |
| 235             | $[Exp\_CD28/80/86/PD1/L1/L2]*Tumor.[C13a=PDL1]+[C13a=PDL1:aPDL1]+ [T13b=PD1:PDL1=C13a]$                                                                                            |
| 236             | $[Exp\_CD28/80/86/PD1/L1/L2]*Tumor.[C13b=PDL2]+ [T13b=PD1:PDL2=C13b]$                                                                                                              |
| 237             | $[Exp\_CD28/80/86/PD1/L1/L2]*Tumor.[C13c=CD80]+ [T13a=PDL1:CD80=C13c]$                                                                                                             |
| 238             | $[kon\_PD1\_PDL1]*Tumor.[C14a=PD1]*Tumor.[T14a=PDL1]/[V\_T:C\_14] - [koff\_PD1\_PDL1]*Tumor.[T14a=PDL1:PD1=C14a]$                                                                  |
| 239             | $[Exp\_CD28/80/86/PD1/L1/L2]*Tumor.[C14a=PD1]+[C14a=PD1:aPD1]+ [T14a=PDL1:PD1=C14a]$                                                                                               |
| 240             | $[kon\_PDL1\_CD80]*Tumor.[C14b=PDL1]*Tumor.[T14c=CD80]/[V\_T:C\_14] - [koff\_PDL1\_CD80]*Tumor.[T14c=CD80:PDL1=C14b]$                                                              |
| 241             | $[kon\_PDL1-PDL1mAb]*Tumor.[C14b=PDL1]*Tumor.PDL1\_mabt/Vt - [koff\_PDL1-PDL1mAb]*Tumor.[C14b=PDL1:aPDL1]$                                                                         |
| 242             | $[Exp\_CD28/80/86/PD1/L1/L2]*Tumor.[C14b=PDL1]+[C14b=PDL1:aPDL1]+ [T14b=PD1:PDL1=C14b]+ [T14c=CD80:PDL1=C14b]$                                                                     |
| 243             | $[kon\_PDL1\_CD80]*Tumor.[C14c=CD80]*Tumor.[T14a=PDL1]/[V\_T:C\_14] - [koff\_PDL1\_CD80]*Tumor.[T14a=PDL1:CD80=C14c]$                                                              |
| 244             | $[Exp\_CD28/80/86/PD1/L1/L2]*Tumor.[C14c=CD80]+ [T14a=PDL1:CD80=C14c]$                                                                                                             |
| 245             | $[kon\_PD1-PD1mAb]*Tumor.[C15a=PD1]*Tumor.PD1\_mabt/Vt - [koff\_PD1-PD1mAb]*Tumor.[C15a=PD1:aPD1]$                                                                                 |
| 246             | $[Exp\_CD28/80/86/PD1/L1/L2]*Tumor.[C15a=PD1]+[C15a=PD1:aPD1]+ [T15a=PDL1:PD1=C15a]$                                                                                               |
| 247             | $[kon\_PD1\_PDL2]*Tumor.[C15b=PDL2]*Tumor.[T15b=PD1]/[V\_T:C\_15] - [koff\_PD1\_PDL2]*Tumor.[T15b=PD1:PDL2=C15b]$                                                                  |

| Reaction Number | Reaction Rate                                                                                                                                                    |
|-----------------|------------------------------------------------------------------------------------------------------------------------------------------------------------------|
| 248             | [Exp_CD28/80/86/PD1/L1/L2]*(Tumor.[C15b=PDL2] + [T15b=PD1:PDL2=C15b])                                                                                            |
| 249             | [kon_PDL1_CD80]*Tumor.[C15c=CD80]*Tumor.[T15a=PDL1]/[V_T:C_15] - [koff_PDL1_CD80]*Tumor.[T15a=PDL1:CD80=C15c]                                                    |
| 250             | [Exp_CD28/80/86/PD1/L1/L2]*(Tumor.[C15c=CD80]+ [T15a=PDL1:CD80=C15c])                                                                                            |
| 251             | [kon_PD1_PDL1]*Tumor.[C16a=PD1]*Tumor.[T16a=PDL1]/[V_T:C_16] - [koff_PD1_PDL1]*Tumor.[T16a=PD1:PD1=C16a]                                                         |
| 252             | [kon_PD1-PD1mAb]*Tumor.[C16a=PD1]*Tumor.PD1_mabt/Vt - [koff_PD1-PD1mAb]*Tumor.[C16a=PD1:aPD1]                                                                    |
| 253             | [Exp_CD28/80/86/PD1/L1/L2]*(Tumor.[C16a=PD1]+[C16a=PD1:aPD1]+ [T16a=PDL1:PD1=C16a])                                                                              |
| 254             | [kon_PDL1-PDL1mAb]*Tumor.[C16b=PDL1]*Tumor.PDL1_mabt/Vt-[koff_PDL1-PDL1mAb]*Tumor.[C16b=PDL1:aPDL1]                                                              |
| 255             | [Exp_CD28/80/86/PD1/L1/L2]*(Tumor.[C16b=PDL1]+[C16b=PDL1:aPDL1]+ [T16c=CD80:PDL1=C16b]+ [T16b=PD1:PDL1=C16b])                                                    |
| 256             | [kon_PD1_PDL2]*Tumor.[C16c=PDL2]*Tumor.[T16b=PD1]/[V_T:C_16] - [koff_PD1_PDL2]*Tumor.[T16b=PD1:PDL2=C16c]                                                        |
| 257             | [Exp_CD28/80/86/PD1/L1/L2]*(Tumor.[C16c=PDL2]+ [T16b=PD1:PDL2=C16c])                                                                                             |
| 258             | [Exp_CD28/80/86/PD1/L1/L2]*(Tumor.[C16d=CD80]+ [T16a=PDL1:CD80=C16d])                                                                                            |
| 259             | [Exp_CD28/80/86/PD1/L1/L2]*(Tumor.[C2=PD1]+[C2=PD1:aPD1]+[T2=PDL1:PD1=C2])                                                                                       |
| 260             | [Exp_CD28/80/86/PD1/L1/L2]*(Tumor.[C3=PDL1]+[C3=PDL1:aPDL1]+[T3a=PD1:PDL1=C3]+[T3b=CD80:PDL1=C3])                                                                |
| 261             | [Exp_CD28/80/86/PD1/L1/L2]*(Tumor.[C4=PDL2]+[T4=PD1:PDL2=C4])                                                                                                    |
| 262             | [Exp_CD28/80/86/PD1/L1/L2]*(Tumor.[C5=CD80]+[T5=PDL1:CD80=C5])                                                                                                   |
| 263             | [kon_PD1-PD1mAb]*Tumor.[C6a=PD1]*Tumor.PD1_mabt/Vt - [koff_PD1-PD1mAb]*Tumor.[C6a=PD1:aPD1]                                                                      |
| 264             | [Exp_CD28/80/86/PD1/L1/L2]*(Tumor.[C6a=PD1]+[C6a=PD1:aPD1]+[T6a=PDL1:PD1=C6a])                                                                                   |
| 265             | [kon_PD1_PDL1]*Tumor.[C6b=PDL1]*Tumor.[T6b=PD1]/[V_T:C_6] - [koff_PD1_PDL1]*Tumor.[T6b=PD1:PDL1=C6b]                                                             |
| 266             | [kon_PDL1_CD80]*Tumor.[C6b=PDL1]*Tumor.[T6c=CD80]/[V_T:C_6] - [koff_PDL1_CD80]*Tumor.[T6c=CD80:PDL1=C6b]                                                         |
| 267             | [kon_PDL1-PDL1mAb]*Tumor.[C6b=PDL1]*Tumor.PDL1_mabt/Vt - [koff_PDL1-PDL1mAb]*Tumor.[C6b=PDL1:aPDL1]                                                              |
| 268             | [Exp_CD28/80/86/PD1/L1/L2]*(Tumor.[C6b=PDL1]+[C6b=PDL1:aPDL1]+[T6b=PD1:PDL1=C6b]+[T6c=CD80:PDL1=C6b])                                                            |
| 269             | [Exp_CD28/80/86/PD1/L1/L2]*(Tumor.[C7a=PD1]+[C7a=PD1:aPD1]+[T7a=PDL1:PD1=C7a])                                                                                   |
| 270             | [Exp_CD28/80/86/PD1/L1/L2]*(Tumor.[C7b=PDL2]+[T7b=PD1:PDL2=C7b])                                                                                                 |
| 271             | [kon_PDL1_CD80]*Tumor.[C8a=PDL1]*Tumor.[T8b=CD80]/[V_T:C_8] - [koff_PDL1_CD80]*Tumor.[T8b=CD80:PDL1=C8a]                                                         |
| 272             | [kon_PDL1-PDL1mAb]*Tumor.[C8a=PDL1]*Tumor.PDL1_mabt/Vt - [koff_PDL1-PDL1mAb]*Tumor.[C8a=PDL1:aPDL1]                                                              |
| 273             | [Exp_CD28/80/86/PD1/L1/L2]*(Tumor.[C8a=PDL1]+[C8a=PDL1:aPDL1]+[T8a=PD1:PDL1=C8a]+[T8b=CD80:PDL1=C8a])                                                            |
| 274             | [Exp_CD28/80/86/PD1/L1/L2]*(Tumor.[C8b=PDL2]+[T8a=PD1:PDL2=C8b])                                                                                                 |
| 275             | [kon_PD1_PDL1]*Tumor.[C9a=PD1]*Tumor.[T9=PDL1]/[V_T:C_9] - [koff_PD1_PDL1]*Tumor.[T9=PDL1-PD1=C9a]                                                               |
| 276             | [Exp_CD28/80/86/PD1/L1/L2]*(Tumor.[C9a=PD1]+[C9a=PD1:aPD1]+[T9=PDL1-PD1=C9a])                                                                                    |
| 277             | [Exp_CD28/80/86/PD1/L1/L2]*(Tumor.[C9b=CD80]+[T9=PDL1-CD80=C9b])                                                                                                 |
| 278             | Endo_CTLA4*Tumor.[CTLA4:CD80_TrAT]                                                                                                                               |
| 279             | Endo_CTLA4*Tumor.[CTLA4:CD86_TrAT]                                                                                                                               |
| 280             | Endo_CTLA4*Tumor.[CTLA4_CTLA4-Trt]                                                                                                                               |
| 281             | [Exp_CD28/80/86/PD1/L1/L2]*Tumor.[T{PD1}{80}-{PDL1}{PDL2}C]*(PD1_receptors-per-Tcell)/[Avagadro's_Num]*(Cancer_per_T_Cell_Int)/[Cancer_per_T_Cell_max]           |
| 282             | [Exp_CD28/80/86/PD1/L1/L2]*Tumor.[T{PD1}{80}-{PDL1}{PDL2}C]*(CD80_receptors-per-Tcell)/[Avagadro's_Num]*(Cancer_per_T_Cell_Int)/[Cancer_per_T_Cell_max]          |
| 283             | [Exp_CD28/80/86/PD1/L1/L2]*Tumor.[T{PD1}{CD80}-{PDL1}C]*(PD1_receptors-per-Tcell)/[Avagadro's_Num]*(Cancer_per_T_Cell_Int)/[Cancer_per_T_Cell_max]               |
| 284             | [Exp_CD28/80/86/PD1/L1/L2]*Tumor.[T{PD1}{CD80}-{PDL1}C]*(CD80_receptors-per-Tcell)/[Avagadro's_Num]*(Cancer_per_T_Cell_Int)/[Cancer_per_T_Cell_max]              |
| 285             | [Exp_CD28/80/86/PD1/L1/L2]*Tumor.[T{PD1}{L1}{80}-{PD1}{80}{L1}{L2}C]*(PD1_receptors-per-Tcell)/[Avagadro's_Num]*(Cancer_per_T_Cell_Int)/[Cancer_per_T_Cell_max]  |
| 286             | [Exp_CD28/80/86/PD1/L1/L2]*Tumor.[T{PD1}{L1}{80}-{PD1}{80}{L1}{L2}C]*(PD1_receptors-per-Tcell)/[Avagadro's_Num]*(Cancer_per_T_Cell_Int)/[Cancer_per_T_Cell_max]  |
| 287             | [Exp_CD28/80/86/PD1/L1/L2]*Tumor.[T{PD1}{L1}{80}-{PD1}{80}{L1}{L2}C]*(CD80_receptors-per-Tcell)/[Avagadro's_Num]*(Cancer_per_T_Cell_Int)/[Cancer_per_T_Cell_max] |
| 288             | [Exp_CD28/80/86/PD1/L1/L2]*Tumor.[T{PD1}{L1}{80}-{PD1}{80}{L1}C]*(PD1_receptors-per-Tcell)/[Avagadro's_Num]*(Cancer_per_T_Cell_Int)/[Cancer_per_T_Cell_max]      |
| 289             | [Exp_CD28/80/86/PD1/L1/L2]*Tumor.[T{PD1}{L1}{80}-{PD1}{80}{L1}C]*(PD1_receptors-per-Tcell)/[Avagadro's_Num]*(Cancer_per_T_Cell_Int)/[Cancer_per_T_Cell_max]      |
| 290             | [Exp_CD28/80/86/PD1/L1/L2]*Tumor.[T{PD1}{L1}{80}-{PD1}{80}{L1}C]*(CD80_receptors-per-Tcell)/[Avagadro's_Num]*(Cancer_per_T_Cell_Int)/[Cancer_per_T_Cell_max]     |
| 291             | [Exp_CD28/80/86/PD1/L1/L2]*Tumor.[T{PD1}{L1}{80}-{PD1}{L1}{L2}C]*(PD1_receptors-per-Tcell)/[Avagadro's_Num]*(Cancer_per_T_Cell_Int)/[Cancer_per_T_Cell_max]      |
| 292             | [Exp_CD28/80/86/PD1/L1/L2]*Tumor.[T{PD1}{L1}{80}-{PD1}{L1}{L2}C]*(PD1_receptors-per-Tcell)/[Avagadro's_Num]*(Cancer_per_T_Cell_Int)/[Cancer_per_T_Cell_max]      |
| 293             | [Exp_CD28/80/86/PD1/L1/L2]*Tumor.[T{PD1}{L1}{80}-{PD1}{L1}{L2}C]*(CD80_receptors-per-Tcell)/[Avagadro's_Num]*(Cancer_per_T_Cell_Int)/[Cancer_per_T_Cell_max]     |
| 294             | [Exp_CD28/80/86/PD1/L1/L2]*Tumor.[T{PD1}{L1}{80}-{PD1}{L1}C]*(PD1_receptors-per-Tcell)/[Avagadro's_Num]*(Cancer_per_T_Cell_Int)/[Cancer_per_T_Cell_max]          |

| Reaction Number | Reaction Rate                                                                                                                                                                       |
|-----------------|-------------------------------------------------------------------------------------------------------------------------------------------------------------------------------------|
| 295             | $[Exp\_CD28/80/86/PD1/L1/L2]*Tumor.[T\{PD1\}\{L1\}\{80\}-\{PD1\}\{L1\}C]*(PD1\_receptors-per-Tcell)/[Avagadro's\_Num]*([Cancer\_per\_T\_Cell\_Int]/[Cancer\_per\_T\_Cell\_max])$    |
| 296             | $[Exp\_CD28/80/86/PD1/L1/L2]*Tumor.[T\{PD1\}\{L1\}\{80\}-\{PD1\}\{L1\}C]*(CD80\_receptors-per-Tcell)/[Avagadro's\_Num]*([Cancer\_per\_T\_Cell\_Int]/[Cancer\_per\_T\_Cell\_max])$   |
| 297             | $[Exp\_CD28/80/86/PD1/L1/L2]*Tumor.[T\{PD1\}\{L1\}-\{PD1\}\{80\}\{PDL2\}C]*(PDL1\_receptors-per-Tcell)/[Avagadro's\_Num]*([Cancer\_per\_T\_Cell\_Int]/[Cancer\_per\_T\_Cell\_max])$ |
| 298             | $[Exp\_CD28/80/86/PD1/L1/L2]*Tumor.[T\{PD1\}\{L1\}-\{PD1\}\{80\}\{PDL2\}C]*(PD1\_receptors-per-Tcell)/[Avagadro's\_Num]*([Cancer\_per\_T\_Cell\_Int]/[Cancer\_per\_T\_Cell\_max])$  |
| 299             | $[Exp\_CD28/80/86/PD1/L1/L2]*Tumor.[T\{PD1\}\{L1\}-\{PD1\}\{L2\}C]*(PDL1\_receptors-per-Tcell)/[Avagadro's\_Num]*([Cancer\_per\_T\_Cell\_Int]/[Cancer\_per\_T\_Cell\_max])$         |
| 300             | $[Exp\_CD28/80/86/PD1/L1/L2]*Tumor.[T\{PD1\}\{L1\}-\{PD1\}\{L2\}C]*(PD1\_receptors-per-Tcell)/[Avagadro's\_Num]*([Cancer\_per\_T\_Cell\_Int]/[Cancer\_per\_T\_Cell\_max])$          |
| 301             | $[Exp\_CD28/80/86/PD1/L1/L2]*Tumor.[T\{PD1\}\{L1\}-\{PDL1\}\{80\}\{L2\}C]*(PDL1\_receptors-per-Tcell)/[Avagadro's\_Num]*([Cancer\_per\_T\_Cell\_Int]/[Cancer\_per\_T\_Cell\_max])$  |
| 302             | $[Exp\_CD28/80/86/PD1/L1/L2]*Tumor.[T\{PD1\}\{L1\}-\{PDL1\}\{80\}\{L2\}C]*(PD1\_receptors-per-Tcell)/[Avagadro's\_Num]*([Cancer\_per\_T\_Cell\_Int]/[Cancer\_per\_T\_Cell\_max])$   |
| 303             | $[Exp\_CD28/80/86/PD1/L1/L2]*Tumor.[T\{PD1\}\{L1\}-\{PDL1\}\{80\}C]*(PDL1\_receptors-per-Tcell)/[Avagadro's\_Num]*([Cancer\_per\_T\_Cell\_Int]/[Cancer\_per\_T\_Cell\_max])$        |
| 304             | $[Exp\_CD28/80/86/PD1/L1/L2]*Tumor.[T\{PD1\}\{L1\}-\{PDL1\}\{80\}C]*(PD1\_receptors-per-Tcell)/[Avagadro's\_Num]*([Cancer\_per\_T\_Cell\_Int]/[Cancer\_per\_T\_Cell\_max])$         |
| 305             | $[Exp\_CD28/80/86/PD1/L1/L2]*Tumor.[T\{PD1\}\{L1\}-\{PDL2\}\{80\}C]*(PDL1\_receptors-per-Tcell)/[Avagadro's\_Num]*([Cancer\_per\_T\_Cell\_Int]/[Cancer\_per\_T\_Cell\_max])$        |
| 306             | $[Exp\_CD28/80/86/PD1/L1/L2]*Tumor.[T\{PD1\}\{L1\}-\{PDL2\}\{80\}C]*(PD1\_receptors-per-Tcell)/[Avagadro's\_Num]*([Cancer\_per\_T\_Cell\_Int]/[Cancer\_per\_T\_Cell\_max])$         |
| 307             | $[Exp\_CD28/80/86/PD1/L1/L2]*Tumor.[T\{PD1\}-\{PDL2\}C]*(PD1\_receptors-per-Tcell)/[Avagadro's\_Num]*([Cancer\_per\_T\_Cell\_Int]/[Cancer\_per\_T\_Cell\_max])$                     |
| 308             | $[Exp\_CD28/80/86/PD1/L1/L2]*Tumor.[T\{PDL1\}-\{CD80\}\{PD1\}C]*(PDL1\_receptors-per-Tcell)/[Avagadro's\_Num]*([Cancer\_per\_T\_Cell\_Int]/[Cancer\_per\_T\_Cell\_max])$            |
| 309             | $[Exp\_CD28/80/86/PD1/L1/L2]*Tumor.[T\{PDL1\}-\{CD80\}C]*(PDL1\_receptors-per-Tcell)/[Avagadro's\_Num]*([Cancer\_per\_T\_Cell\_Int]/[Cancer\_per\_T\_Cell\_max])$                   |
| 310             | $[Exp\_CD28/80/86/PD1/L1/L2]*Tumor.[T\{PDL1\}-\{PD1\}C]*(PDL1\_receptors-per-Tcell)/[Avagadro's\_Num]*([Cancer\_per\_T\_Cell\_Int]/[Cancer\_per\_T\_Cell\_max])$                    |
| 311             | $[kon\_PD1\_PDL1]*Tumor.[T10a=PDL1]*Tumor.[C10a=PD1]/[V\_T:C\_10] - [koff\_PD1\_PDL1]*Tumor.[T10a=PDL1:PD1=C10a]$                                                                   |
| 312             | $[kon\_PDL1-PDL1mAb]*Tumor.[T10a=PDL1]*Tumor.PDL1\_mabt/Vt-[koff\_PDL1-PDL1mAb]*Tumor.[T10a=PDL1:aPDL1]$                                                                            |
| 313             | $[Exp\_CD28/80/86/PD1/L1/L2]*(Tumor.[T10a=PDL1]+[T10a=PDL1:aPDL1]+[T10a=PDL1:PD1=C10a])$                                                                                            |
| 314             | $[kon\_PD1\_PDL1]*Tumor.[T10b=PD1]*Tumor.[C10b=PDL1]/[V\_T:C\_10] - [koff\_PD1\_PDL1]*Tumor.[T10b=PD1:PDL1=C10b]$                                                                   |
| 315             | $[kon\_PD1\_PDL2]*Tumor.[T10b=PD1]*Tumor.[C10c=PDL2]/[V\_T:C\_10] - [koff\_PD1\_PDL2]*Tumor.[T10b=PD1:PDL2=C10c]$                                                                   |
| 316             | $[Exp\_CD28/80/86/PD1/L1/L2]*(Tumor.[T10b=PD1]+[T10b=PD1:aPDL1]+ [T10b=PD1:PDL1=C10b]+ [T10b=PD1:PDL2=C10c])$                                                                       |
| 317             | $[kon\_PDL1\_CD80]*Tumor.[T10c=CD80]*Tumor.[C10b=PDL1]/[V\_T:C\_10] - [koff\_PDL1\_CD80]*Tumor.[T10c=CD80:PDL1=C10b]$                                                               |
| 318             | $[Exp\_CD28/80/86/PD1/L1/L2]*(Tumor.[T10c=CD80]+ [T10c=CD80:PDL1=C10b])$                                                                                                            |
| 319             | $[kon\_PDL1\_CD80]*Tumor.[T11a=PDL1]*Tumor.[C11b=CD80]/[V\_T:C\_11] - [koff\_PDL1\_CD80]*Tumor.[T11a=PDL1:CD80=C11b]$                                                               |
| 320             | $[kon\_PDL1-PDL1mAb]*Tumor.[T11a=PDL1]*Tumor.PDL1\_mabt/Vt - [koff\_PDL1-PDL1mAb]*Tumor.[T11a=PDL1:aPDL1]$                                                                          |
| 321             | $[Exp\_CD28/80/86/PD1/L1/L2]*(Tumor.[T11a=PDL1]+[T11a=PDL1:aPDL1]+ [T11a=PDL1:CD80=C11b])$                                                                                          |
| 322             | $[kon\_PD1\_PDL1]*Tumor.[T11b=PD1]*Tumor.[C11a=PDL1]/[V\_T:C\_11] - [koff\_PD1\_PDL1]*Tumor.[T11b=PD1:PDL1=C11a]$                                                                   |
| 323             | $[Exp\_CD28/80/86/PD1/L1/L2]*(Tumor.[T11b=PD1]+[T11b=PD1:aPDL1]+ [T11b=PD1:PDL1=C11a])$                                                                                             |
| 324             | $[kon\_PDL1\_CD80]*Tumor.[T12a=PDL1]*Tumor.[C12b=CD80]/[V\_T:C\_12] - [koff\_PDL1\_CD80]*Tumor.[T12a=PDL1:CD80=C12b]$                                                               |
| 325             | $[kon\_PDL1-PDL1mAb]*Tumor.[T12a=PDL1]*Tumor.PDL1\_mabt/Vt - [koff\_PDL1-PDL1mAb]*Tumor.[T12a=PDL1:aPDL1]$                                                                          |
| 326             | $[Exp\_CD28/80/86/PD1/L1/L2]*(Tumor.[T12a=PDL1]+[T12a=PDL1:aPDL1]+ [T12a=PDL1:CD80=C12b])$                                                                                          |
| 327             | $[kon\_PD1\_PDL2]*Tumor.[T12b=PD1]*Tumor.[C12a=PDL2]/[V\_T:C\_12] - [koff\_PD1\_PDL2]*Tumor.[T12b=PD1:PDL2=C12a]$                                                                   |
| 328             | $[Exp\_CD28/80/86/PD1/L1/L2]*(Tumor.[T12b=PD1]+[T12b=PD1:aPDL1]+ [T12b=PD1:PDL2=C12a])$                                                                                             |
| 329             | $[kon\_PDL1\_CD80]*Tumor.[T13a=PDL1]*Tumor.[C13c=CD80]/[V\_T:C\_13] - [koff\_PDL1\_CD80]*Tumor.[T13a=PDL1:CD80=C13c]$                                                               |
| 330             | $[Exp\_CD28/80/86/PD1/L1/L2]*(Tumor.[T13a=PDL1]+[T13a=PDL1:aPDL1]+ [T13a=PDL1:CD80=C13c])$                                                                                          |
| 331             | $[kon\_PD1\_PDL1]*Tumor.[T13b=PD1]*Tumor.[C13a=PDL1]/[V\_T:C\_13] - [koff\_PD1\_PDL1]*Tumor.[T13b=PD1:PDL1=C13a]$                                                                   |
| 332             | $[kon\_PD1\_PDL2]*Tumor.[T13b=PD1]*Tumor.[C13b=PDL2]/[V\_T:C\_13] - [koff\_PD1\_PDL2]*Tumor.[T13b=PD1:PDL2=C13b]$                                                                   |



| Reaction Number | Reaction Rate                                                                                                 |
|-----------------|---------------------------------------------------------------------------------------------------------------|
| 333             | [kon_PD1-PD1mAb]*Tumor.[T13b=PD1]*Tumor.PD1_mabt/Vt-[koff_PD1-PD1mAb]*Tumor.[T13b=PD1:aPD1]                   |
| 334             | [Exp_CD28/80/86/PD1/L1/L2]*(Tumor.[T13b=PD1]+[T13b=PD1:aPD1]+[T13b=PD1:PD2=C13b]+[T13b=PD1:PD1=C13a])         |
| 335             | [kon_PDL1-PDL1mAb]*Tumor.[T14a=PDL1]*Tumor.PDL1_mabt/Vt - [koff_PDL1-PDL1mAb]*Tumor.[T14a=PDL1:aPDL1]         |
| 336             | [Exp_CD28/80/86/PD1/L1/L2]*(Tumor.[T14a=PDL1]+[T14a=PDL1:aPDL1]+[T14a=PDL1:PD1=C14a]+[T14a=PDL1:CD80=C14c])   |
| 337             | [kon_PD1_PDL1]*Tumor.[T14b=PD1]*Tumor.[C14b=PDL1]/[V_T:C_14] - [koff_PD1_PDL1]*Tumor.[T14b=PD1:PD1=C14b]      |
| 338             | [Exp_CD28/80/86/PD1/L1/L2]*(Tumor.[T14b=PD1]+[T14b=PD1:aPD1]+[T14b=PD1:PD1=C14b])                             |
| 339             | [Exp_CD28/80/86/PD1/L1/L2]*(Tumor.[T14c=CD80]+[T14c=CD80:PD1=C14b])                                           |
| 340             | [kon_PD1_PDL1]*Tumor.[T15a=PDL1]*Tumor.[C15a=PD1]/[V_T:C_15] - [koff_PD1_PDL1]*Tumor.[T15a=PDL1:PD1=C15a]     |
| 341             | [kon_PDL1-PDL1mAb]*Tumor.[T15a=PDL1]*Tumor.PDL1_mabt/Vt - [koff_PDL1-PDL1mAb]*Tumor.[T15a=PDL1:aPDL1]         |
| 342             | [Exp_CD28/80/86/PD1/L1/L2]*(Tumor.[T15a=PDL1]+[T15a=PDL1:aPDL1]+[T15a=PDL1:CD80=C15c]+[T15a=PDL1:PD1=C15a])   |
| 343             | [kon_PD1-PD1mAb]*Tumor.[T15b=PD1]*Tumor.PD1_mabt/Vt - [koff_PD1-PD1mAb]*Tumor.[T15b=PD1:aPD1]                 |
| 344             | [Exp_CD28/80/86/PD1/L1/L2]*(Tumor.[T15b=PD1]+[T15b=PD1:aPD1]+[T15b=PD1:PD2=C15b])                             |
| 345             | [kon_PDL1_CD80]*Tumor.[T16a=PDL1]*Tumor.[C16d=CD80]/[V_T:C_16] - [koff_PDL1_CD80]*Tumor.[T16a=PDL1:CD80=C16d] |
| 346             | [kon_PDL1-PDL1mAb]*Tumor.[T16a=PDL1]*Tumor.PDL1_mabt/Vt - [koff_PDL1-PDL1mAb]*Tumor.[T16a=PDL1:aPDL1]         |
| 347             | [Exp_CD28/80/86/PD1/L1/L2]*(Tumor.[T16a=PDL1]+[T16a=PDL1:aPDL1]+[T16a=PDL1:PD1=C16a]+[T16a=PDL1:CD80=C16d])   |
| 348             | [kon_PD1_PDL1]*Tumor.[T16b=PD1]*Tumor.[C16b=PDL1]/[V_T:C_16] - [koff_PD1_PDL1]*Tumor.[T16b=PD1:PD1=C16b]      |
| 349             | [kon_PD1-PD1mAb]*Tumor.[T16b=PD1]*Tumor.PD1_mabt/Vt - [koff_PD1-PD1mAb]*Tumor.[T16b=PD1:aPD1]                 |
| 350             | [Exp_CD28/80/86/PD1/L1/L2]*(Tumor.[T16b=PD1]+[T16b=PD1:aPD1]+[T16b=PD1:PD2=C16c]+[T16b=PD1:PD1=C16b])         |
| 351             | [kon_PDL1_CD80]*Tumor.[T16c=CD80]*Tumor.[C16b=PDL1]/[V_T:C_16] - [koff_PDL1_CD80]*Tumor.[T16c=CD80:PD1=C16b]  |
| 352             | [Exp_CD28/80/86/PD1/L1/L2]*(Tumor.[T16c=CD80]+[T16c=CD80:PD1=C16b])                                           |
| 353             | [kon_PD1_PDL1]*Tumor.[T2=PD1]*Tumor.[C2=PD1]/[V_T:C_2] - [koff_PD1_PDL1]*Tumor.[T2=PD1:PD1=C2]                |
| 354             | [Exp_CD28/80/86/PD1/L1/L2]*(Tumor.[T2=PD1]+[T2=PD1:aPD1]+[T2=PD1:PD1=C2])                                     |
| 355             | [kon_PD1_PDL1]*Tumor.[T3a=PD1]*Tumor.[C3=PDL1]/[V_T:C_3] - [koff_PD1_PDL1]*Tumor.[T3a=PD1:PD1=C3]             |
| 356             | [kon_PD1-PD1mAb]*Tumor.[T3a=PD1]*Tumor.PD1_mabt/Vt - [koff_PD1-PD1mAb]*Tumor.[T3a=PD1:aPD1]                   |
| 357             | [Exp_CD28/80/86/PD1/L1/L2]*(Tumor.[T3a=PD1]+[T3a=PD1:aPD1]+[T3a=PD1:PD1=C3])                                  |
| 358             | [kon_PDL1_CD80]*Tumor.[T3b=CD80]*Tumor.[C3=PDL1]/[V_T:C_3] - [koff_PDL1_CD80]*Tumor.[T3b=CD80:PD1=C3]         |
| 359             | [Exp_CD28/80/86/PD1/L1/L2]*(Tumor.[T3b=CD80]+[T3b=CD80:PD1=C3])                                               |
| 360             | [kon_PD1_PDL2]*Tumor.[T4=PD1]*Tumor.[C4=PD2]/[V_T:C_4] - [koff_PD1_PDL2]*Tumor.[T4=PD1:PD2=C4]                |
| 361             | [kon_PD1-PD1mAb]*Tumor.[T4=PD1]*Tumor.PD1_mabt/Vt - [koff_PD1-PD1mAb]*Tumor.[T4=PD1:aPD1]                     |
| 362             | [Exp_CD28/80/86/PD1/L1/L2]*(Tumor.[T4=PD1]+[T4=PD1:aPD1]+[T4=PD1:PD2=C4])                                     |
| 363             | [kon_PDL1_CD80]*Tumor.[T5=PD1]*Tumor.[C5=CD80]/[V_T:C_5] - [koff_PDL1_CD80]*Tumor.[T5=PD1:CD80=C5]            |
| 364             | [kon_PDL1-PDL1mAb]*Tumor.[T5=PD1]*Tumor.PDL1_mabt/Vt - [koff_PDL1-PDL1mAb]*Tumor.[T5=PD1:aPDL1]               |
| 365             | [Exp_CD28/80/86/PD1/L1/L2]*(Tumor.[T5=PD1]+[T5=PD1:aPDL1]+[T5=PD1:CD80=C5])                                   |
| 366             | [kon_PD1_PDL1]*Tumor.[T6a=PDL1]*Tumor.[C6a=PD1]/[V_T:C_6] - [koff_PD1_PDL1]*Tumor.[T6a=PDL1:PD1=C6a]          |
| 367             | [kon_PDL1-PDL1mAb]*Tumor.[T6a=PDL1]*Tumor.PDL1_mabt/Vt - [koff_PDL1-PDL1mAb]*Tumor.[T6a=PDL1:aPDL1]           |
| 368             | [Exp_CD28/80/86/PD1/L1/L2]*(Tumor.[T6a=PDL1]+[T6a=PDL1:aPDL1]+[T6a=PDL1:PD1=C6a])                             |
| 369             | [kon_PD1-PD1mAb]*Tumor.[T6b=PD1]*Tumor.PD1_mabt/Vt - [koff_PD1-PD1mAb]*Tumor.[T6b=PD1:aPD1]                   |
| 370             | [Exp_CD28/80/86/PD1/L1/L2]*(Tumor.[T6b=PD1]+[T6b=PD1:aPD1]+[T6b=PD1:PD1=C6b])                                 |
| 371             | [Exp_CD28/80/86/PD1/L1/L2]*(Tumor.[T6c=CD80]+[T6c=CD80:PD1=C6b])                                              |
| 372             | [kon_PD1_PDL1]*Tumor.[T7a=PD1]*Tumor.[C7a=PD1]/[V_T:C_7] - [koff_PD1_PDL1]*Tumor.[T7a=PD1:PD1=C7a]            |
| 373             | [Exp_CD28/80/86/PD1/L1/L2]*(Tumor.[T7a=PD1]+[T7a=PD1:aPDL1]+[T7a=PD1:PD1=C7a])                                |
| 374             | [kon_PD1_PDL2]*Tumor.[T7b=PD1]*Tumor.[C7b=PD2]/[V_T:C_7] - [koff_PD1_PDL2]*Tumor.[T7b=PD1:PD2=C7b]            |
| 375             | [Exp_CD28/80/86/PD1/L1/L2]*(Tumor.[T7b=PD1]+[T7b=PD1:aPD1]+[T7b=PD1:PD2=C7b])                                 |
| 376             | [kon_PD1_PDL1]*Tumor.[T8a=PD1]*Tumor.[C8a=PD1]/[V_T:C_8] - [koff_PD1_PDL1]*Tumor.[T8a=PD1:PD1=C8a]            |
| 377             | [kon_PD1_PDL2]*Tumor.[T8a=PD1]*Tumor.[C8b=PD2]/[V_T:C_8] - [koff_PD1_PDL2]*Tumor.[T8a=PD1:PD2=C8b]            |
| 378             | [Exp_CD28/80/86/PD1/L1/L2]*(Tumor.[T8a=PD1]+[T8a=PD1:aPD1]+[T8a=PD1:PD1=C8a]+[T8a=PD1:PD2=C8b])               |
| 379             | [Exp_CD28/80/86/PD1/L1/L2]*(Tumor.[T8b=CD80]+[T8b=CD80:PD1=C8a])                                              |
| 380             | [kon_PDL1_CD80]*Tumor.[T9=PD1]*Tumor.[C9b=CD80]/[V_T:C_9] - [koff_PDL1_CD80]*Tumor.[T9=PD1:CD80=C9b]          |
| 381             | [kon_PDL1-PDL1mAb]*Tumor.[T9=PD1]*Tumor.PDL1_mabt/Vt - [koff_PDL1-PDL1mAb]*Tumor.[T9=PD1:aPDL1]               |
| 382             | [Exp_CD28/80/86/PD1/L1/L2]*(Tumor.[T9=PD1]+[T9=PD1:aPDL1]+[T9=PD1:PD1=C9a]+[T9=PD1:CD80=C9b])                 |
| 383             | kf_RestingMacrophage*Tumor.APC_T                                                                              |
| 384             | Phago_Debris*Tumor.C_DebrisT*Tumor.APC_T                                                                      |
| 385             | Debris_Transport*Tumor.C_DebrisT*(1/(Num_TDLN_Considered))*(1-[mAPC_Debris_T_Inact])                          |
| 386             | Debris_Decay*Tumor.C_DebrisT                                                                                  |

| Reaction Number | Reaction Rate                                                                                                                                                                                  |
|-----------------|------------------------------------------------------------------------------------------------------------------------------------------------------------------------------------------------|
| 387             | Debris_Transport*Tumor.C_DebrisT*[mAPC_Debris_T_Inact]                                                                                                                                         |
| 388             | Debris_Transport*Tumor.C_DebrisT*(1-1/[Num_TDLN_Considered])                                                                                                                                   |
| 389             | kf_CanDecay*Tumor.Cancer                                                                                                                                                                       |
| 390             | [Exp_CD28/80/86/PD1/L1/L2]*(Tumor.CD80_mAPCT+[CTLA4:CD80_TrAT])                                                                                                                                |
| 391             | [kon_PDL1_CD80]*Tumor.CD80_TeffT*Tumor.PDL1_TregT/[Vol_Cell-Rec_Tr-TeffT] - [koff_PDL1_CD80]*Tumor.[PDL1:CD80_TrTeff]                                                                          |
| 392             | [Exp_CD28/80/86/PD1/L1/L2]*(Tumor.CD80_TeffT+[PDL1:CD80_TrTeff])                                                                                                                               |
| 393             | [Exp_CD28/80/86/PD1/L1/L2]*(Tumor.CD80_TeffT1+[PDL1:CD80_MDSCT])                                                                                                                               |
| 394             | [Exp_CD28/80/86/PD1/L1/L2]*(Tumor.CD86_mAPCT+[CTLA4:CD86_TrAT])                                                                                                                                |
| 395             | Kpa_TB*S_TB*Vt_avg_const*(1.43/1.63)*Tumor.CTLA4_mabt/(Vt_Teff*Tumor_Void_Fraction)-Kpa_TB*S_TB*Vt_avg_const*(1.43/1.63)*Lymph_Node.CTLA4_mab/(VL)                                             |
| 396             | [kon_CTLA4_CD80]*Tumor.CTLA4_TregT*Tumor.CD80_mAPCT/[Vol_Cell-Rec_Tr-APCT] - [koff_CTLA4_CD80]*Tumor.[CTLA4:CD80_TrAT]                                                                         |
| 397             | [kon_CTLA4_CD86]*Tumor.CTLA4_TregT*Tumor.CD86_mAPCT/[Vol_Cell-Rec_Tr-APCT] - [koff_CTLA4_CD86]*Tumor.[CTLA4:CD86_TrAT]                                                                         |
| 398             | kon_CTLA4mAb_CTLA4*Tumor.CTLA4_TregT*Tumor.CTLA4_mabt/Vt - koff_CTLA4mAb_CTLA4*Tumor.[CTLA4_CTLA4-Trt]                                                                                         |
| 399             | [Exp_CTLA4]*(Tumor.CTLA4_TregT+[CTLA4:CD80_TrAT]+[CTLA4:CD86_TrAT]+[CTLA4_CTLA4-Trt])                                                                                                          |
| 400             | EffT_Turnover*Tumor.Effector_TT                                                                                                                                                                |
| 401             | EffT_Res_Conversion*Tumor.Effector_TT*(1-TheEnd)*.9                                                                                                                                            |
| 402             | EffT_Res_Conversion*Tumor.Effector_TT*(1-TheEnd)*.1                                                                                                                                            |
| 403             | CancerTEng * Tumor.Cancer1 * ((Tumor.Effector_TT_C_Eng/(Tumor.Cancer1+1E-100*mole))^gamma_TC_Assoc)/(s_Assoc + (Tumor.Effector_TT_C_Eng/(Tumor.Cancer1+1E-100*mole))^gamma_TC_Assoc)           |
| 404             | EffT_Turnover*Tumor.EffT_AR_Vasc                                                                                                                                                               |
| 405             | J_Tmr*Tumor.EffT_AR_Vasc                                                                                                                                                                       |
| 406             | EffT_Turnover*Tumor.EffT_b_Vasc                                                                                                                                                                |
| 407             | AR_Tmr*Tumor.EffT_b_Vasc                                                                                                                                                                       |
| 408             | kr_Tmr*Tumor.EffT_b_Vasc                                                                                                                                                                       |
| 409             | kf_Tmr*Tmr_Free_Sites*Tumor.EffT_f_Vasc/Vv_Tmr                                                                                                                                                 |
| 410             | (QC_Tmr - LC_Tmr)*Tumor.EffT_f_Vasc/Vv_Tmr                                                                                                                                                     |
| 411             | EffT_Turnover*Tumor.EffT_f_Vasc                                                                                                                                                                |
| 412             | mAPC_Migrate*Tumor.mAPC_T*(1/[Num_TDLN_Considered])*(1-[mAPC_Debris_T_Inact])                                                                                                                  |
| 413             | mAPC_Migrate*Tumor.mAPC_T*(1-1/[Num_TDLN_Considered])                                                                                                                                          |
| 414             | mAPC_Migrate*Tumor.mAPC_T*[mAPC_Debris_T_Inact]                                                                                                                                                |
| 415             | [Exp_CD28/80/86/PD1/L1/L2]*Tumor.mAPCT_EngTregT*((CD80_receptors-per-mAPC)/[Avagadro's_Num])*(1/Tr_cells_per_mAPC)                                                                             |
| 416             | [Exp_CD28/80/86/PD1/L1/L2]*Tumor.mAPCT_EngTregT*((CD86_receptors-per-mAPC)/[Avagadro's_Num])*(1/Tr_cells_per_mAPC)                                                                             |
| 417             | TregTMDSCEng*Tumor.Effector_TT_MDSCs*((Tumor.MDSC_T/(Tumor.Effector_TT_MDSCs + 1E-100*mole))^gamma_TC_Assoc)/(s_Assoc + (Tumor.MDSC_T/(Tumor.Effector_TT_MDSCs + 1E-100*mole))^gamma_TC_Assoc) |
| 418             | [Exp_CD28/80/86/PD1/L1/L2]*Tumor.MDSCsT_EngTeff*((PD1_receptors-per-Tcell)/[Avagadro's_Num])*(1/T_per_Tr_cell)                                                                                 |
| 419             | [Exp_CD28/80/86/PD1/L1/L2]*Tumor.MDSCsT_EngTeff*((PDL1_receptors-per-Tcell)/[Avagadro's_Num])*(1/T_per_Tr_cell)                                                                                |
| 420             | [Treg:T_IntTime]*Tumor.MDSCsT_Teff*[Sig_MDSCTEff=Total]                                                                                                                                        |
| 421             | [Treg:T_IntTime]*Tumor.MDSCsT_Teff*(1-[Sig_MDSCTEff=Total])                                                                                                                                    |
| 422             | Kpa_TB*S_TB*Vt_avg_const*(1.43/1.63)*Tumor.PD1_mabt/(Vt_Teff*Tumor_Void_Fraction)-Kpa_TB*S_TB*Vt_avg_const*(1.43/1.63)*Lymph_Node.PD1_mab/(VL)                                                 |
| 423             | [kon_PD1-PD1mAb]*Tumor.PD1_mabt*Tumor.[C14a=PD1]/Vt - [koff_PD1-PD1mAb]*Tumor.[C14a=PD1:aPD1]                                                                                                  |
| 424             | [kon_PD1-PD1mAb]*Tumor.PD1_mabt*Tumor.[C2=PD1]/Vt - [koff_PD1-PD1mAb]*Tumor.[C2=PD1:aPD1]                                                                                                      |
| 425             | [kon_PD1-PD1mAb]*Tumor.PD1_mabt*Tumor.[C7a=PD1]/Vt - [koff_PD1-PD1mAb]*Tumor.[C7a=PD1:aPD1]                                                                                                    |
| 426             | [kon_PD1-PD1mAb]*Tumor.PD1_mabt*Tumor.[C9a=PD1]/Vt - [koff_PD1-PD1mAb]*Tumor.[C9a=PD1:aPD1]                                                                                                    |
| 427             | [kon_PD1-PD1mAb]*Tumor.PD1_mabt*Tumor.[T10b=PD1]/Vt - [koff_PD1-PD1mAb]*Tumor.[T10b=PD1:aPD1]                                                                                                  |
| 428             | [kon_PD1-PD1mAb]*Tumor.PD1_mabt*Tumor.[T11b=PD1]/Vt - [koff_PD1-PD1mAb]*Tumor.[T11b=PD1:aPD1]                                                                                                  |
| 429             | [kon_PD1-PD1mAb]*Tumor.PD1_mabt*Tumor.[T12b=PD1]/Vt - [koff_PD1-PD1mAb]*Tumor.[T12b=PD1:aPD1]                                                                                                  |
| 430             | [kon_PD1-PD1mAb]*Tumor.PD1_mabt*Tumor.[T14b=PD1]/Vt - [koff_PD1-PD1mAb]*Tumor.[T14b=PD1:aPD1]                                                                                                  |
| 431             | [kon_PD1-PD1mAb]*Tumor.PD1_mabt*Tumor.[T7b=PD1]/Vt - [koff_PD1-PD1mAb]*Tumor.[T7b=PD1:aPD1]                                                                                                    |
| 432             | [kon_PD1-PD1mAb]*Tumor.PD1_mabt*Tumor.[T8a=PD1]/Vt - [koff_PD1-PD1mAb]*Tumor.[T8a=PD1:aPD1]                                                                                                    |
| 433             | [kon_PD1-PD1mAb]*Tumor.PD1_mabt*Tumor.PD1_TeffT/Vt - [koff_PD1-PD1mAb]*Tumor.[PD1:aPD1_Teff]                                                                                                   |
| 434             | [kon_PD1-PD1mAb]*Tumor.PD1_MDSCsT*Tumor.PD1_mabt/Vt - [koff_PD1-PD1mAb]*Tumor.[PD1:aPD1_MDSCs]                                                                                                 |
| 435             | [kon_PD1_PDL1]*Tumor.PD1_MDSCsT*Tumor.PDL1_TeffT1/[Vol_Cell-Rec_MDSC-TeffT] - [koff_PD1_PDL1]*Tumor.[PD1:PDL1_MDSCT]                                                                           |
| 436             | [Exp_CD28/80/86/PD1/L1/L2]*(Tumor.PD1_MDSCsT+[PD1:PDL1_MDSCT]+[PD1:aPD1_MDSCs])                                                                                                                |
| 437             | [kon_PD1_PDL1]*Tumor.PD1_TeffT*Tumor.PDL1_TregT/[Vol_Cell-Rec_Tr-TeffT] - [koff_PD1_PDL1]*Tumor.[PDL1:PD1_TrTeff]                                                                              |
| 438             | [Exp_CD28/80/86/PD1/L1/L2]*(Tumor.PD1_TeffT+[PDL1:PD1_TrTeff]+[PD1:aPD1_Teff])                                                                                                                 |
| 439             | [kon_PD1-PD1mAb]*Tumor.PD1_TeffT1*Tumor.PD1_mabt/Vt - [koff_PD1-PD1mAb]*Tumor.[PD1:aPD1_Teff1]                                                                                                 |
| 440             | [Exp_CD28/80/86/PD1/L1/L2]*(Tumor.PD1_TeffT1+[PDL1:PD1_MDSCT]+[PD1:aPD1_Teff1])                                                                                                                |

| Reaction Number | Reaction Rate                                                                                                                                                                                     |
|-----------------|---------------------------------------------------------------------------------------------------------------------------------------------------------------------------------------------------|
| 441             | $[kon\_PD1\_PDL1mAb]*Tumor.PD1\_TregT*Tumor.PD1\_mabt/Vt - [koff\_PD1\_PDL1mAb]*Tumor.[PD1:aPD1\_Treg]$                                                                                           |
| 442             | $[Exp\_CD28/80/86/PD1/L1/L2]*(Tumor.PD1\_TregT+[PD1:PDL1\_TrTeff]+[PD1:aPD1\_Treg])$                                                                                                              |
| 443             | $Kpa\_TB*S\_TB*Vt\_avg\_const*(1.43/1.63)*Tumor.PDL1\_mabt/(Vt\_Teff*Tumor\_Void\_Fraction)-$<br>$Kpa\_TB*S\_TB*Vt\_avg\_const*(1.43/1.63)*Lymph\_Node.PDL1\_mab/(VL)$                            |
| 444             | $[kon\_PDL1\_PDL1mAb]*Tumor.PDL1\_mabt*Tumor.[C3=PDL1]/Vt - [koff\_PDL1\_PDL1mAb]*Tumor.[C3=PDL1:aPDL1]$                                                                                          |
| 445             | $[kon\_PDL1\_PDL1mAb]*Tumor.PDL1\_mabt*Tumor.[T13a=PDL1]/Vt - [koff\_PDL1\_PDL1mAb]*Tumor.[T13a=PDL1:aPDL1]$                                                                                      |
| 446             | $[kon\_PDL1\_PDL1mAb]*Tumor.PDL1\_mabt*Tumor.[T2=PDL1]/Vt - [koff\_PDL1\_PDL1mAb]*Tumor.[T2=PDL1:aPDL1]$                                                                                          |
| 447             | $[kon\_PDL1\_PDL1mAb]*Tumor.PDL1\_mabt*Tumor.[T7a=PDL1]/Vt - [koff\_PDL1\_PDL1mAb]*Tumor.[T7a=PDL1:aPDL1]$                                                                                        |
| 448             | $[kon\_PDL1\_PDL1mAb]*Tumor.PDL1\_mabt*Tumor.PDL1\_TeffT/Vt - [koff\_PDL1\_PDL1mAb]*Tumor.[PDL1:aPDL1\_Teff]$                                                                                     |
| 417             | $[kon\_PDL1\_PDL1mAb]*Tumor.PDL1\_mabt*Tumor.PDL1\_TeffT/Vt - [koff\_PDL1\_PDL1mAb]*Tumor.[PDL1:aPDL1\_Teff1]$                                                                                    |
| 418             | $[kon\_PDL1\_CD80]*Tumor.PDL1\_MDSCsT*Tumor.CD80\_TeffT1/[Vol\_Cell-Rec\_MDSC-TeffT] -$<br>$[koff\_PDL1\_CD80]*Tumor.[PDL1:CD80\_MDSC]$                                                           |
| 419             | $[kon\_PD1\_PDL1]*Tumor.PDL1\_MDSCsT*Tumor.PD1\_TeffT1/[Vol\_Cell-Rec\_MDSC-TeffT] -$<br>$[koff\_PD1\_PDL1]*Tumor.[PDL1:PD1\_MDSC]$                                                               |
| 420             | $[kon\_PDL1\_PDL1mAb]*Tumor.PDL1\_MDSCsT*Tumor.PDL1\_mabt/Vt - [koff\_PDL1\_PDL1mAb]*Tumor.[PDL1:aPDL1\_MDSCs]$                                                                                   |
| 421             | $[Exp\_CD28/80/86/PD1/L1/L2]*(Tumor.PDL1\_MDSCsT+[PDL1:CD80\_MDSC]+[PDL1:PD1\_MDSC]+[PDL1:aPDL1\_MDSCs])$                                                                                         |
| 422             | $[kon\_PD1\_PDL1]*Tumor.PDL1\_TeffT*Tumor.PD1\_TregT/[Vol\_Cell-Rec\_Tr-TeffT] -$<br>$[koff\_PD1\_PDL1]*Tumor.[PD1:PDL1\_TrTeff]$                                                                 |
| 423             | $[Exp\_CD28/80/86/PD1/L1/L2]*(Tumor.PDL1\_TeffT+[PD1:PDL1\_TrTeff]+[PDL1:aPDL1\_Teff])$                                                                                                           |
| 424             | $[Exp\_CD28/80/86/PD1/L1/L2]*(Tumor.PDL1\_TeffT1+[PD1:PDL1\_MDSC]+[PDL1:aPDL1\_Teff1])$                                                                                                           |
| 425             | $[kon\_PDL1\_PDL1mAb]*Tumor.PDL1\_TregT*Tumor.PDL1\_mabt/Vt - [koff\_PDL1\_PDL1mAb]*Tumor.[PDL1:aPDL1\_Treg]$                                                                                     |
| 426             | $[Exp\_CD28/80/86/PD1/L1/L2]*(Tumor.PDL1\_TregT+[PDL1:CD80\_TrTeff]+[PDL1:PD1\_TrTeff]+[PDL1:aPDL1\_Treg])$                                                                                       |
| 427             | $kf\_TRecover*Tumor.T\_Recover\_Can\_Dead*(1-Total\_TC\_Sig)$                                                                                                                                     |
| 428             | $CancerTInt*Tumor.TC1*(1-Total\_TC\_Sig*[%Sig\_Inhibit\_Cancer])$                                                                                                                                 |
| 429             | $CancerTInt*Tumor.TC1*Total\_TC\_Sig*[%Sig\_Inhibit\_Cancer]$                                                                                                                                     |
| 430             | $CancerTInt*Tumor.TC2*Total\_TC\_Sig*[%Sig\_Inhibit\_Cancer]$                                                                                                                                     |
| 431             | $[Exp\_CD28/80/86/PD1/L1/L2]*Tumor.Teff\_EngMDSC*([CD80\_receptors-per-Tcell]/[Avagadro's\_Num])*(1/Tr\_per\_T\_cell)$                                                                            |
| 432             | $[Exp\_CD28/80/86/PD1/L1/L2]*Tumor.Teff\_EngMDSC*([PDL1\_receptors-per-Tcell]/[Avagadro's\_Num])*(1/Tr\_per\_T\_cell)$                                                                            |
| 433             | $[Exp\_CD28/80/86/PD1/L1/L2]*Tumor.Teff\_EngMDSC*([PDL1\_receptors-per-Tcell]/[Avagadro's\_Num])*(1/Tr\_per\_T\_cell)$                                                                            |
| 434             | $[Exp\_CD28/80/86/PD1/L1/L2]*Tumor.Teff\_EngTregT*([CD80\_receptors-per-Tcell]/[Avagadro's\_Num])*(1/Tr\_per\_T\_cell)$                                                                           |
| 435             | $[Exp\_CD28/80/86/PD1/L1/L2]*Tumor.Teff\_EngTregT*([PD1\_receptors-per-Tcell]/[Avagadro's\_Num])*(1/Tr\_per\_T\_cell)$                                                                            |
| 436             | $[Exp\_CD28/80/86/PD1/L1/L2]*Tumor.Teff\_EngTregT*([PDL1\_receptors-per-Tcell]/[Avagadro's\_Num])*(1/Tr\_per\_T\_cell)$                                                                           |
| 437             | $TregTMDSCEng*Tumor.Effector\_TT\_TregT*((TregT/(Tumor.Effector\_TT\_TregT + 1E-20*mole))^gamma\_TC\_Assoc)/($<br>$s\_Assoc + (TregT/(Tumor.Effector\_TT\_TregT + 1E-20*mole))^gamma\_TC\_Assoc)$ |
| 438             | $[Exp\_CTLA4]*Tumor.TregT\_EngAPC*([CTLA4\_receptors-Tr]/[Avagadro's\_Num])*(1/mAPC\_per\_Tr\_cell)$                                                                                              |
| 439             | $[Exp\_CD28/80/86/PD1/L1/L2]*Tumor.TregT\_EngTeff*([PD1\_receptors-per-Tcell]/[Avagadro's\_Num])*(1/T\_per\_Tr\_cell)$                                                                            |
| 440             | $[Exp\_CD28/80/86/PD1/L1/L2]*Tumor.TregT\_EngTeff*([PDL1\_receptors-per-Tcell]/[Avagadro's\_Num])*(1/T\_per\_Tr\_cell)$                                                                           |
| 441             | $[Treg:T\_IntTime]*Tumor.TregT\_Teff*[Sig\_TrTeff=Total]$                                                                                                                                         |
| 442             | $[Treg:T\_IntTime]*Tumor.TregT\_Teff*(1-[Sig\_TrTeff=Total])$                                                                                                                                     |

Table S2 – Model Reaction Rates (End)

Table S3 – Model Reaction and Rate Descriptions (Start)

| Reaction Number | Reaction Description                                                                                                                                                  |
|-----------------|-----------------------------------------------------------------------------------------------------------------------------------------------------------------------|
| 1               | Distribution of Anti-CTLA-4 mAb between the central and lymph node compartments                                                                                       |
| 2               | Distribution of Anti-CTLA-4 mAb between the central and leaky tissues                                                                                                 |
| 3               | Distribution of Anti-CTLA-4 mAb between the central and tight tissues                                                                                                 |
| 4               | Distribution of Anti-CTLA-4 mAb between the central and tumor compartments                                                                                            |
| 5               | Clearance of Anti-CTLA-4 mAb from the central compartment                                                                                                             |
| 6               | The generation of Effector T cells and their migration into the blood/plasma from the designated number of lymph nodes as a multiple of that from a single lymph node |
| 7               | Trafficking of free Effector T cells from blood to GI vasculature                                                                                                     |
| 8               | Trafficking of free Effector T cells from blood to Liver vasculature                                                                                                  |
| 9               | Trafficking of free Effector T cells from blood to Spleen vasculature                                                                                                 |
| 10              | Trafficking of free Effector T cells from blood to Lymph Node vasculature                                                                                             |
| 11              | The natural turnover of Effector T cells in the blood                                                                                                                 |
| 12              | Trafficking of free Effector T cells from blood to Peripheral (other tissues not directly accounted for) vasculature                                                  |
| 13              | Trafficking of free Effector T cells from blood to Tumor vasculature                                                                                                  |
| 14              | Distribution of Anti-PD-1 mAb between the central and lymph node compartments                                                                                         |
| 15              | Distribution of Anti-PD-1 mAb between the central and leaky tissues                                                                                                   |
| 16              | Distribution of Anti-PD-1 mAb between the central and tight tissues                                                                                                   |
| 17              | Distribution of Anti-PD-1 mAb between the central and tumor compartments                                                                                              |

| Reaction Number | Reaction Description                                                                                                            |
|-----------------|---------------------------------------------------------------------------------------------------------------------------------|
| 18              | Clearance of Anti-PD-1 mAb from the central compartment                                                                         |
| 19              | Distribution of Anti-PD-L1 mAb between the central and lymph node compartments                                                  |
| 20              | Distribution of Anti-PD-L1 mAb between the central and leaky tissues                                                            |
| 21              | Distribution of Anti-PD-L1 mAb between the central and tight tissues                                                            |
| 22              | Distribution of Anti-PD-L1 mAb between the central and tumor compartments                                                       |
| 23              | Clearance of Anti-PD-L1 mAb from the central compartment                                                                        |
| 24              | Saturation of Anti-PD-L1 mAb clearance from the central compartment                                                             |
| 25              | Trafficking of Effector T cells from GI to Liver vasculature                                                                    |
| 26              | Turnover of free Effector T cells in the GI vasculature                                                                         |
| 27              | Extravasation of arrested Effector T cells from the Liver vasculature                                                           |
| 28              | Turnover of arrested Effector T cells in the Liver vasculature                                                                  |
| 29              | Arrest of bound Effector T cells in the Liver vasculature                                                                       |
| 30              | Detachment of bound Effector T cells in the Liver vasculature                                                                   |
| 31              | Turnover of bound Effector T cells in the liver vasculature                                                                     |
| 32              | Trafficking of free Effector T cells from Liver to Lung vasculature                                                             |
| 33              | Turnover of free Effector T cells in the liver vasculature                                                                      |
| 34              | Trafficking of free Effector T cells from Liver to lymph node extravascular space                                               |
| 35              | Turnover of Effector T cells in the Liver extravascular space                                                                   |
| 36              | Extravasation of arrested Effector T cells from the Spleen vasculature                                                          |
| 37              | Turnover of arrested Effector T cells in the Spleen vasculature                                                                 |
| 38              | Arrest of bound Effector T cells in the Spleen vasculature                                                                      |
| 39              | Detachment of bound Effector T cells in the Spleen vasculature                                                                  |
| 40              | Turnover of bound Effector T cells in the Spleen vasculature                                                                    |
| 41              | Binding or free Effector T cells to the Spleen vasculature                                                                      |
| 42              | Trafficking of free Effector T cells from Spleen to Liver vasculature                                                           |
| 43              | Turnover of free Effector T cells in the Spleen vasculature                                                                     |
| 44              | Trafficking of free Effector T cells from Spleen to lymph node extravascular space                                              |
| 45              | Turnover of Effector T cells in the Spleen extravascular space                                                                  |
| 46              | Binding or free Effector T cells to the Liver vasculature                                                                       |
| 47              | Extravasation of arrested Effector T cells from the Lungs vasculature                                                           |
| 48              | Turnover of arrested Effector T cells in the Lungs vasculature                                                                  |
| 49              | Depletion of arrested Effector T cells in the Lungs vasculature                                                                 |
| 50              | Binding or free Effector T cells to the Lungs vasculature                                                                       |
| 51              | Trafficking of free Effector T cells from Lungs to (arterial) Blood                                                             |
| 52              | Turnover of free Effector T cells in the Lungs vasculature                                                                      |
| 53              | Trafficking of free Effector T cells from Lungs to lymph node extravascular space                                               |
| 54              | Turnover of Effector T cells in the Lungs extravascular space                                                                   |
| 55              | Arrest of bound Effector T cells in the Lungs vasculature                                                                       |
| 56              | Detachment of bound Effector T cells in the Lungs vasculature                                                                   |
| 57              | Turnover of bound Effector T cells in the Lungs vasculature                                                                     |
| 58              | Depletion of bound Effector T cells in the Lungs vasculature                                                                    |
| 59              | Interaction at the immunological synapse between CD80 on Primed Naive T cells and PD-L1 on T Regulatory cells in the lymph node |
| 60              | CD80 expression threshold on Primed Naive T cells for interaction with T Regulatory cells in the lymph node                     |
| 61              | Interaction at the immunological synapse between PD-1 on Primed Naive T cells and PD-L1 on T Regulatory cells in the lymph node |
| 62              | Interaction at the immunological synapse between PD-1 on Primed Naive T cells and Anti-PD-1 mAb in the lymph node               |
| 63              | PD-1 expression threshold on Primed Naive T cells for interaction with T Regulatory cells in the lymph node                     |
| 64              | Interaction at the immunological synapse between PD-L1 on Primed Naive T cells and Anti-PD-L1 mAb in the lymph node             |
| 65              | PD-L1 expression threshold on Primed Naive T cells for interaction with T Regulatory cells in the lymph node                    |
| 66              | Inactivation of Naïve T cells by T Regulatory cells in the lymph node                                                           |
| 67              | Dissociation of T Regulatory cells from Naïve T cells in the lymph node without inactivation of the latter                      |
| 68              | Inactivation of Primed Naïve T cells by T Regulatory cells in the lymph node                                                    |
| 69              | Dissociation of T Regulatory cells from Primed Naïve T cells in the lymph node without inactivation of the latter               |
| 70              | CD80 expression by Primed Naive T cells for interaction with T Regulatory cells in the lymph node                               |
| 71              | PD-1 expression by Primed Naive T cells for interaction with T Regulatory cells in the lymph node                               |
| 72              | PD-L1 expression by Primed Naive T cells for interaction with T Regulatory cells in the lymph node                              |
| 73              | PD-1 expression by T Regulatory cells for interaction with Primed Naive T cells in the lymph node                               |
| 74              | PD-L1 expression by T Regulatory cells for interaction with Primed Naive T cells in the lymph node                              |
| 75              | CD80 expression threshold on mAPCs for interaction with T Regulatory cells in the lymph node                                    |
| 76              | CD86 expression threshold on mAPCs for interaction with T Regulatory cells in the lymph node                                    |
| 77              | Interaction at the immunological synapse between CD80 on mAPCs and CTLA-4 on T Regulatory cells in the lymph node               |
| 78              | Interaction at the immunological synapse between CD86 on mAPCs and CTLA-4 on T Regulatory cells in the lymph node               |
| 79              | Interaction at the immunological synapse between CTLA-4 on T Regulatory cells and Anti-CTLA-4 mAb in the lymph node             |
| 80              | CTLA-4 expression threshold on T Regulatory cells for interaction with mAPCs in the lymph node                                  |
| 81              | Interaction at the immunological synapse between PD-L1 on Primed Naive T cells and PD-1 on T Regulatory cells in the lymph node |
| 82              | Interaction at the immunological synapse between PD-1 on T Regulatory cells and Anti-PD-1 mAb in the lymph node                 |

| Reaction Number | Reaction Description                                                                                                                                                |
|-----------------|---------------------------------------------------------------------------------------------------------------------------------------------------------------------|
| 83              | PD-1 expression threshold on Regulatory cells for interaction with Primed Naive T cells in the lymph node                                                           |
| 84              | Interaction at the immunological synapse between PD-L1 on T Regulatory cells and Anti-PD-L1 mAb in the lymph node                                                   |
| 85              | Interaction at the immunological synapse between PD-L1 on T Regulatory cells and Anti-PD-1 mAb in the lymph node                                                    |
| 86              | Phagocytosis of tumor debris by resident APCs in the lymph node                                                                                                     |
| 87              | Decay of tumor debris in the lymph nodes                                                                                                                            |
| 88              | Lymph return of Anti-CTLA-4 to the blood                                                                                                                            |
| 89              | Interaction at the immunological synapse between CTLA-4 on Primed Naive T cells during priming interactions with mAPCs and Anti-CTLA-4 mAb in the lymph node        |
| 90              | Internalization of the CTLA-4 receptor on Primed Naive T cells following its binding to Anti-CTLA-4 mAb                                                             |
| 91              | Migration of Effector T cells from the lymph node into the blood (removal linked to regeneration by algebraic equation below)                                       |
| 92              | Return of Effector T cells from lymph node extravascular space to the Lungs vascular space                                                                          |
| 93              | Turnover of Effector T cells in the lymph node extravascular space                                                                                                  |
| 94              | Trafficking of free Effector T cells from lymph node vascular space to the Lungs vascular space                                                                     |
| 95              | Turnover of free Effector T cells in the lymph node vascular space                                                                                                  |
| 96              | CD80 expression by total mAPCs in the lymph node                                                                                                                    |
| 97              | CD86 expression by total mAPCs in the lymph node                                                                                                                    |
| 98              | PD-1 expression by total mAPCs in the lymph node                                                                                                                    |
| 99              | PD-L1 expression by total mAPCs in the lymph node                                                                                                                   |
| 100             | PD-L2 expression by total mAPCs in the lymph node                                                                                                                   |
| 101             | Natural turnover of mAPCs in the lymph node                                                                                                                         |
| 102             | Inactivation of mAPCs in the lymph node as a result of CTLA-4 secreted from T Regulatory cells in the lymph nodes binding to CD80 and CD86                          |
| 103             | CD80 expression threshold on mAPCs in the lymph node                                                                                                                |
| 104             | CD86 expression threshold on mAPCs in the lymph node                                                                                                                |
| 105             | CD80 expression by mAPCs that interact with Naive T cells in the lymph node                                                                                         |
| 106             | CD86 expression by mAPCs that interact with Naive T cells in the lymph node                                                                                         |
| 107             | CD80 expression threshold on mAPCs for interaction with Naive T cells in the lymph node                                                                             |
| 108             | CD86 expression threshold on mAPCs for interaction with Naive T cells in the lymph node                                                                             |
| 109             | CD80 expression by mAPCs that interact with Primed Naive T cells in the lymph node                                                                                  |
| 110             | CD86 expression by mAPCs that interact with Primed Naive T cells in the lymph node                                                                                  |
| 111             | PD-1 expression by mAPCs that interact with Primed Naive T cells in the lymph node                                                                                  |
| 112             | PD-L1 expression by mAPCs that interact with Primed Naive T cells in the lymph node                                                                                 |
| 113             | PD-L2 expression by mAPCs that interact with Primed Naive T cells in the lymph node                                                                                 |
| 114             | Interaction at the immunological synapse between CD80 on mAPCs and CTLA-4 on Primed Naive T cells in the lymph node                                                 |
| 115             | Interaction at the immunological synapse between CD80 on mAPCs and PD-L1 on Primed Naive T cells in the lymph node                                                  |
| 116             | CD80 expression threshold on mAPCs for interaction with Primed Naive T cells in the lymph node                                                                      |
| 117             | Interaction at the immunological synapse between CD86 on mAPCs and CTLA-4 on Primed Naive T cells in the lymph node                                                 |
| 118             | Interaction at the immunological synapse between CD86 on mAPCs and CD28 on Primed Naive T cells in the lymph node                                                   |
| 119             | CD86 expression threshold on mAPCs for interaction with Primed Naive T cells in the lymph node                                                                      |
| 120             | Interaction at the immunological synapse between PD-1 on mAPCs cells during priming interactions with Primed Naive T cells and Anti-PD-1 mAb in the lymph node      |
| 121             | PD-1 expression threshold on mAPCs for interaction with Primed Naive T cells in the lymph node                                                                      |
| 122             | PD-L1 expression threshold on mAPCs for interaction with Primed Naive T cells in the lymph node                                                                     |
| 123             | Interaction at the immunological synapse between PD-L2 on mAPCs and PD-1 on Primed Naive T cells in the lymph node                                                  |
| 124             | PD-L2 expression threshold on mAPCs for interaction with Primed Naive T cells in the lymph node                                                                     |
| 125             | PD-1 expression threshold on total mAPCs in the lymph node                                                                                                          |
| 126             | PD-L1 expression threshold on total mAPCs in the lymph node                                                                                                         |
| 127             | PD-L2 expression threshold on total mAPCs in the lymph node                                                                                                         |
| 128             | Engagement of Naive T cells in the first priming phase in the lymph node                                                                                            |
| 129             | Naive T cells cycling out of the lymph node                                                                                                                         |
| 130             | Naive T cells being disengaged in the first priming phase without undergoing successful priming in the lymph node                                                   |
| 131             | Naive T cells successfully undergoing the first priming phase in the lymph node                                                                                     |
| 132             | Transendocytosis of the CD80 receptors on mAPCs through CTLA-4 binding and internalization on Primed Naive T cells in the lymph node                                |
| 133             | Transendocytosis of the CD86 receptors on mAPCs through CTLA-4 binding and internalization on Primed Naive T cells in the lymph node                                |
| 134             | Interaction at the immunological synapse between CD80 on mAPCs cells and CD28 on Naive T cells in the lymph node                                                    |
| 135             | Interaction at the immunological synapse between CD86 on mAPCs cells and CD28 on Naive T cells in the lymph node                                                    |
| 136             | CD28 expression threshold on Naive T cells in the lymph node                                                                                                        |
| 137             | Naive T cells expressing CD28 in the lymph node                                                                                                                     |
| 138             | Lymph return of Anti-PD-1 to the blood                                                                                                                              |
| 139             | Lymph return of Anti-PD-L1 to the blood                                                                                                                             |
| 140             | Interaction at the immunological synapse between PD-L1 on mAPCs involved in the second priming phase and Anti-PD-L1 mAb in the lymph node                           |
| 141             | Interaction at the immunological synapse between PD-L1 on Primed Naive T cells involved in the second priming phase with mAPCs and Anti-PD-L1 mAb in the lymph node |
| 142             | CTLA-4 expression threshold on Primed Naive T cells for interaction with mAPCs in the lymph node                                                                    |
| 143             | Interaction at the immunological synapse between CD80 on mAPCs and CD28 on Primed Naive T cells in the lymph node                                                   |

| Reaction Number | Reaction Description                                                                                                                                              |
|-----------------|-------------------------------------------------------------------------------------------------------------------------------------------------------------------|
| 144             | CD28 expression threshold on Primed Naïve T cells for interaction with mAPCs in the lymph node                                                                    |
| 145             | Interaction at the immunological synapse between PD-L1 on mAPCs and CD80 on Primed Naïve T cells in the lymph node                                                |
| 146             | CD80 expression threshold on Primed Naïve T cells for interaction with mAPCs in the lymph node                                                                    |
| 147             | Interaction at the immunological synapse between PD-L1 on mAPCs and PD-1 on Primed Naïve T cells in the lymph node                                                |
| 148             | Interaction at the immunological synapse between PD-1 on Primed Naïve T cells involved in the second priming phase with mAPCs and Anti-PD-1 mAb in the lymph node |
| 149             | PD-1 expression threshold on Primed Naïve T cells for interaction with mAPCs in the lymph node                                                                    |
| 150             | Interaction at the immunological synapse between PD-1 on mAPCs and PD-L1 on Primed Naïve T cells in the lymph node                                                |
| 151             | PD-L1 expression threshold on Primed Naïve T cells for interaction with mAPCs in the lymph node                                                                   |
| 152             | CTLA-4 expression by Primed Naïve T cells for interaction with mAPCs in the lymph node                                                                            |
| 153             | CD28 expression by Primed Naïve T cells for interaction with mAPCs in the lymph node                                                                              |
| 154             | CD80 expression by Primed Naïve T cells for interaction with mAPCs in the lymph node                                                                              |
| 155             | PD-1 expression by Primed Naïve T cells for interaction with mAPCs in the lymph node                                                                              |
| 156             | PD-L1 expression by Primed Naïve T cells for interaction with mAPCs in the lymph node                                                                             |
| 157             | Primed Naïve T cells engaging in the second priming phase in the lymph node                                                                                       |
| 158             | Primed Naïve T cells unsuccessfully undergoing the second priming phase to become anergic T cells in the lymph node                                               |
| 159             | Primed Naïve T cells engaged in the second priming phase disengaging from being primed in the lymph node                                                          |
| 160             | Primed Naïve T cells engaged in the second priming phase successfully undergoing priming to become Proliferating T cells in the lymph node                        |
| 161             | Proliferating T cells becoming fully activated Effector T cells in the lymph node                                                                                 |
| 162             | Sets the proliferation threshold for Proliferating T cells in the lymph node                                                                                      |
| 163             | Internalization of the Anti-CTLA-4 antibodies bound to CTLA-4 receptors on T Regulatory cells in the lymph node                                                   |
| 164             | Transendocytosis of the CD80 receptors on mAPCs through CTLA-4 binding and internalization on T Regulatory cells in the lymph node                                |
| 165             | Transendocytosis of the CD86 receptors on mAPCs through CTLA-4 binding and internalization on T Regulatory cells in the lymph node                                |
| 166             | CTLA-4 expression on the surface of non-interacting T Regulatory cells in the lymph node                                                                          |
| 167             | Interaction between T Regulatory cells and mAPCs in lymph node                                                                                                    |
| 168             | Interaction between T Regulatory cells and Naïve T cells in lymph node                                                                                            |
| 169             | Interaction between T Regulatory cells and Primed Naïve T cells in lymph node                                                                                     |
| 170             | Dissociation of T Regulatory cells from mAPCs in the lymph node with inactivation of the latter                                                                   |
| 171             | Dissociation of T Regulatory cells from mAPCs in the lymph node without inactivation of the latter                                                                |
| 172             | CD80 expression by mAPCs for interaction with T Regulatory cells in the lymph node                                                                                |
| 173             | CD86 expression by mAPCs for interaction with T Regulatory cells in the lymph node                                                                                |
| 174             | CTLA-4 expression by T Regulatory cells for interaction with mAPCs in the lymph node                                                                              |
| 175             | Binding of Anti-CTLA-4 to CTLA-4 expressed on the surface of non-interacting T Regulatory in the lymph node                                                       |
| 176             | CTLA-4 expression threshold on non-interacting T Regulatory cells in the lymph node                                                                               |
| 177             | Administration of Anti-CTLA-4 mAb into the central compartment                                                                                                    |
| 178             | Administration of Anti-PD-1 mAb into the central compartment                                                                                                      |
| 179             | Administration of Anti-PD-L1 mAb into the central compartment                                                                                                     |
| 180             | Naïve T cells cycling into the lymph node                                                                                                                         |
| 181             | The proliferation rate of the Proliferating T cells in the lymph node                                                                                             |
| 182             | Appearance of monocytes in the tumor                                                                                                                              |
| 183             | Proliferation of cancer cells in the tumor                                                                                                                        |
| 184             | Distribution of Anti-CTLA-4 mAb between leaky tissues and lymph node                                                                                              |
| 185             | Distribution of Anti-CTLA-4 mAb between tight tissues and lymph node                                                                                              |
| 186             | Trafficking of free Effector T cells from Peripheral tissues vasculature to the lung vasculature                                                                  |
| 187             | Turnover of free Effector T cells in the Peripheral tissues vasculature                                                                                           |
| 188             | Distribution of Anti-PD-1 mAb between leaky tissues and lymph node                                                                                                |
| 189             | Distribution of Anti-PD-1 mAb between tight tissues and lymph node                                                                                                |
| 190             | Distribution of Anti-PD-L1 mAb between leaky tissues and lymph node                                                                                               |
| 191             | Distribution of Anti-PD-L1 mAb between tight tissues and lymph node                                                                                               |
| 192             | CD80 expression by the T5 subtype of cancer cells in the tumor                                                                                                    |
| 193             | PD-1 expression by the T2 subtype of cancer cells in the tumor                                                                                                    |
| 194             | PD-1 expression by the T9 subtype of cancer cells in the tumor                                                                                                    |
| 195             | CD80 expression by the T9 subtype of cancer cells in the tumor                                                                                                    |
| 196             | PD-1 expression by the T6 subtype of cancer cells in the tumor                                                                                                    |
| 197             | PD-L1 expression by the T6 subtype of cancer cells in the tumor                                                                                                   |
| 198             | PD-1 expression by the T14 subtype of cancer cells in the tumor                                                                                                   |
| 199             | PD-L1 expression by the T14 subtype of cancer cells in the tumor                                                                                                  |
| 200             | CD80 expression by the T14 subtype of cancer cells in the tumor                                                                                                   |
| 201             | PD-1 expression by the T10 subtype of cancer cells in the tumor                                                                                                   |
| 202             | PD-L1 expression by the T10 subtype of cancer cells in the tumor                                                                                                  |
| 203             | PD-L2 expression by the T10 subtype of cancer cells in the tumor                                                                                                  |
| 204             | PD-1 expression by the T16 subtype of cancer cells in the tumor                                                                                                   |
| 205             | PD-L1 expression by the T16 subtype of cancer cells in the tumor                                                                                                  |
| 206             | PD-L2 expression by the T16 subtype of cancer cells in the tumor                                                                                                  |
| 207             | CD80 expression by the T16 subtype of cancer cells in the tumor                                                                                                   |

| Reaction Number | Reaction Description                                                                                                                                            |
|-----------------|-----------------------------------------------------------------------------------------------------------------------------------------------------------------|
| 208             | PD-1 expression by the T7 subtype of cancer cells in the tumor                                                                                                  |
| 209             | PD-L2 expression by the T7 subtype of cancer cells in the tumor                                                                                                 |
| 210             | PD-1 expression by the T15 subtype of cancer cells in the tumor                                                                                                 |
| 211             | PD-L2 expression by the T15 subtype of cancer cells in the tumor                                                                                                |
| 212             | CD80 expression by the T15 subtype of cancer cells in the tumor                                                                                                 |
| 213             | PD-L1 expression by the T3 subtype of cancer cells in the tumor                                                                                                 |
| 214             | PD-L1 expression by the T11 subtype of cancer cells in the tumor                                                                                                |
| 215             | CD80 expression by the T11 subtype of cancer cells in the tumor                                                                                                 |
| 216             | PD-L1 expression by the T8 subtype of cancer cells in the tumor                                                                                                 |
| 217             | PD-L2 expression by the T8 subtype of cancer cells in the tumor                                                                                                 |
| 218             | PD-L1 expression by the T13 subtype of cancer cells in the tumor                                                                                                |
| 219             | PD-L2 expression by the T13 subtype of cancer cells in the tumor                                                                                                |
| 220             | CD80 expression by the T13 subtype of cancer cells in the tumor                                                                                                 |
| 221             | PD-L2 expression by the T4 subtype of cancer cells in the tumor                                                                                                 |
| 222             | PD-L2 expression by the T12 subtype of cancer cells in the tumor                                                                                                |
| 223             | CD80 expression by the T12 subtype of cancer cells in the tumor                                                                                                 |
| 224             | Interaction at the immunological synapse between PD-1 expressed by the T10 subtype of cancer cells and Anti-PD-1 in the tumor                                   |
| 225             | PD-1 expression threshold by the T10 subtype of cancer cells in the tumor                                                                                       |
| 226             | Interaction at the immunological synapse between PD-L1 expressed by the T10 subtype of cancer cells and Anti-PD-L1 in the tumor                                 |
| 227             | PD-L1 expression threshold by the T10 subtype of cancer cells in the tumor                                                                                      |
| 228             | PD-L2 expression threshold by the T10 subtype of cancer cells in the tumor                                                                                      |
| 229             | Interaction at the immunological synapse between PD-L1 expressed by the T11 subtype of cancer cells and Anti-PD-L1 in the tumor                                 |
| 230             | PD-L1 expression threshold by the T11 subtype of cancer cells in the tumor                                                                                      |
| 231             | CD80 expression threshold by the T11 subtype of cancer cells in the tumor                                                                                       |
| 232             | PD-L2 expression threshold by the T12 subtype of cancer cells in the tumor                                                                                      |
| 233             | CD80 expression threshold by the T12 subtype of cancer cells in the tumor                                                                                       |
| 234             | Interaction at the immunological synapse between PD-L1 expressed by the T13 subtype of cancer cells and Anti-PD-L1 in the tumor                                 |
| 235             | PD-L1 expression threshold by the T13 subtype of cancer cells in the tumor                                                                                      |
| 236             | PD-L2 expression threshold by the T13 subtype of cancer cells in the tumor                                                                                      |
| 237             | CD80 expression by the T13 subtype of cancer cells in the tumor                                                                                                 |
| 238             | Interaction at the immunological synapse between PD-1 expressed by the T14 subtype of cancer cells and PD-L1 on the complementary Effector T cells in the tumor |
| 239             | PD-1 expression threshold by the T14 subtype of cancer cells in the tumor                                                                                       |
| 240             | Interaction at the immunological synapse between PD-L1 expressed by the T14 subtype of cancer cells and CD80 on the complementary Effector T cells in the tumor |
| 241             | Interaction at the immunological synapse between PD-L1 expressed by the T14 subtype of cancer cells and Anti-PD-L1 in the tumor                                 |
| 242             | PD-L1 expression threshold by the T14 subtype of cancer cells in the tumor                                                                                      |
| 243             | Interaction at the immunological synapse between CD80 expressed by the T14 subtype of cancer cells and PD-L1 on the complementary Effector T cells in the tumor |
| 244             | CD80 expression threshold by the T14 subtype of cancer cells in the tumor                                                                                       |
| 245             | Interaction at the immunological synapse between PD-1 expressed by the T15 subtype of cancer cells and Anti-PD-1 in the tumor                                   |
| 246             | PD-1 expression threshold by the T15 subtype of cancer cells in the tumor                                                                                       |
| 247             | Interaction at the immunological synapse between PD-L2 expressed by the T15 subtype of cancer cells and PD-1 on the complementary Effector T cells in the tumor |
| 248             | PD-L2 expression threshold by the T15 subtype of cancer cells in the tumor                                                                                      |
| 249             | Interaction at the immunological synapse between CD80 expressed by the T15 subtype of cancer cells and PD-L1 on the complementary Effector T cells in the tumor |
| 250             | CD80 expression threshold by the T15 subtype of cancer cells in the tumor                                                                                       |
| 251             | Interaction at the immunological synapse between PD-1 expressed by the T16 subtype of cancer cells and PD-L1 on the complementary Effector T cells in the tumor |
| 252             | Interaction at the immunological synapse between PD-1 expressed by the T16 subtype of cancer cells and Anti-PD-1 in the tumor                                   |
| 253             | PD-1 expression threshold by the T16 subtype of cancer cells in the tumor                                                                                       |
| 254             | Interaction at the immunological synapse between PD-L1 expressed by the T16 subtype of cancer cells and Anti-PD-L1 in the tumor                                 |
| 255             | PD-L1 expression threshold by the T16 subtype of cancer cells in the tumor                                                                                      |
| 256             | Interaction at the immunological synapse between PD-L2 expressed by the T16 subtype of cancer cells and PD-1 on the complementary Effector T cells in the tumor |
| 257             | PD-L2 expression threshold by the T16 subtype of cancer cells in the tumor                                                                                      |
| 258             | CD80 expression threshold by the T16 subtype of cancer cells in the tumor                                                                                       |
| 259             | PD-1 expression threshold by the T2 subtype of cancer cells in the tumor                                                                                        |
| 260             | PD-L1 expression threshold by the T3 subtype of cancer cells in the tumor                                                                                       |

| Reaction Number | Reaction Description                                                                                                                                                  |
|-----------------|-----------------------------------------------------------------------------------------------------------------------------------------------------------------------|
| 261             | PD-L2 expression threshold by the T4 subtype of cancer cells in the tumor                                                                                             |
| 262             | CD80 expression threshold by the T5 subtype of cancer cells in the tumor                                                                                              |
| 263             | Interaction at the immunological synapse between PD-L2 expressed by the T6 subtype of cancer cells and PD-1 on the complementary Effector T cells in the tumor        |
| 264             | PD-1 expression threshold by the T6 subtype of cancer cells in the tumor                                                                                              |
| 265             | Interaction at the immunological synapse between PD-L1 expressed by the T6 subtype of cancer cells and PD-1 on the complementary Effector T cells in the tumor        |
| 266             | Interaction at the immunological synapse between PD-L1 expressed by the T6 subtype of cancer cells and CD80 on the complementary Effector T cells in the tumor        |
| 267             | Interaction at the immunological synapse between PD-L1 expressed by the T6 subtype of cancer cells and Anti-PD-L1 in the tumor                                        |
| 268             | PD-L1 expression threshold by the T6 subtype of cancer cells in the tumor                                                                                             |
| 269             | PD-1 expression threshold by the T7 subtype of cancer cells in the tumor                                                                                              |
| 270             | PD-L2 expression threshold by the T7 subtype of cancer cells in the tumor                                                                                             |
| 271             | Interaction at the immunological synapse between PD-L1 expressed by the T8 subtype of cancer cells and CD80 on Effector T cells in the tumor                          |
| 272             | Interaction at the immunological synapse between PD-L1 expressed by the T8 subtype of cancer cells and Anti-PD-L1 in the tumor                                        |
| 273             | PD-L1 expression threshold by the T8 subtype of cancer cells in the tumor                                                                                             |
| 274             | PD-L2 expression threshold by the T8 subtype of cancer cells in the tumor                                                                                             |
| 275             | Interaction at the immunological synapse between PD-1 expressed by the T9 subtype of cancer cells and PD-L1 on the complementary Effector T cells in the tumor        |
| 276             | PD-1 expression threshold by the T9 subtype of cancer cells in the tumor                                                                                              |
| 277             | CD80 expression threshold by the T9 subtype of cancer cells in the tumor                                                                                              |
| 278             | Transendocytosis of the CD80 receptors on mAPCs through CTLA-4 binding and internalization on T Regulatory cells in the tumor                                         |
| 279             | Transendocytosis of the CD86 receptors on mAPCs through CTLA-4 binding and internalization on T Regulatory cells in the tumor                                         |
| 280             | Internalization of the Anti-CTLA-4 antibodies bound to CTLA-4 receptors on T Regulatory cells in the tumor                                                            |
| 281             | PD-1 expression by Effector T cells interacting with the T8 subtype of cancer cells in the tumor                                                                      |
| 282             | CD80 expression by Effector T cells interacting with the T8 subtype of cancer cells in the tumor                                                                      |
| 283             | PD-1 expression by Effector T cells interacting with the T3 subtype of cancer cells in the tumor                                                                      |
| 284             | CD80 expression by Effector T cells interacting with the T3 subtype of cancer cells in the tumor                                                                      |
| 285             | PD-L1 expression by Effector T cells interacting with the T16 subtype of cancer cells in the tumor                                                                    |
| 286             | PD-1 expression by Effector T cells interacting with the T16 subtype of cancer cells in the tumor                                                                     |
| 287             | CD80 expression by Effector T cells interacting with the T16 subtype of cancer cells in the tumor                                                                     |
| 288             | PD-L1 expression by Effector T cells interacting with the T14 subtype of cancer cells in the tumor                                                                    |
| 289             | PD-1 expression by Effector T cells interacting with the T14 subtype of cancer cells in the tumor                                                                     |
| 290             | CD80 expression by Effector T cells interacting with the T14 subtype of cancer cells in the tumor                                                                     |
| 291             | PD-L1 expression by Effector T cells interacting with the T10 subtype of cancer cells in the tumor                                                                    |
| 292             | PD-1 expression by Effector T cells interacting with the T10 subtype of cancer cells in the tumor                                                                     |
| 293             | CD80 expression by Effector T cells interacting with the T10 subtype of cancer cells in the tumor                                                                     |
| 294             | PD-L1 expression by Effector T cells interacting with the T6 subtype of cancer cells in the tumor                                                                     |
| 295             | PD-1 expression by Effector T cells interacting with the T6 subtype of cancer cells in the tumor                                                                      |
| 296             | CD80 expression by Effector T cells interacting with the T6 subtype of cancer cells in the tumor                                                                      |
| 297             | PD-L1 expression by Effector T cells interacting with the T15 subtype of cancer cells in the tumor                                                                    |
| 298             | PD-1 expression by Effector T cells interacting with the T15 subtype of cancer cells in the tumor                                                                     |
| 299             | PD-L1 expression by Effector T cells interacting with the T7 subtype of cancer cells in the tumor                                                                     |
| 300             | PD-1 expression by Effector T cells interacting with the T7 subtype of cancer cells in the tumor                                                                      |
| 301             | PD-L1 expression by Effector T cells interacting with the T13 subtype of cancer cells in the tumor                                                                    |
| 302             | PD-1 expression by Effector T cells interacting with the T13 subtype of cancer cells in the tumor                                                                     |
| 303             | PD-L1 expression by Effector T cells interacting with the T11 subtype of cancer cells in the tumor                                                                    |
| 304             | PD-1 expression by Effector T cells interacting with the T11 subtype of cancer cells in the tumor                                                                     |
| 305             | PD-L1 expression by Effector T cells interacting with the T12 subtype of cancer cells in the tumor                                                                    |
| 306             | PD-1 expression by Effector T cells interacting with the T12 subtype of cancer cells in the tumor                                                                     |
| 307             | PD-1 expression by Effector T cells interacting with the T4 subtype of cancer cells in the tumor                                                                      |
| 308             | PD-L1 expression by Effector T cells interacting with the T9 subtype of cancer cells in the tumor                                                                     |
| 309             | PD-L1 expression by Effector T cells interacting with the T5 subtype of cancer cells in the tumor                                                                     |
| 310             | PD-L1 expression by Effector T cells interacting with the T2 subtype of cancer cells in the tumor                                                                     |
| 311             | Interaction at the immunological synapse between PD-1 expressed by the T10 subtype of cancer cells and PD-L1 on the complementary Effector T cells in the tumor       |
| 312             | Interaction at the immunological synapse between PD-L1 expressed by the Effector T cells interacting with the T10 subtype of cancer cells and Anti-PD-L1 in the tumor |
| 313             | PD-L1 expression threshold by the Effector T cells interacting with the T10 subtype of cancer cells in the tumor                                                      |
| 314             | Interaction at the immunological synapse between PD-L1 expressed by the T10 subtype of cancer cells and PD-1 on the complementary Effector T cells in the tumor       |
| 315             | Interaction at the immunological synapse between PD-L2 expressed by the T10 subtype of cancer cells and PD-1 on the complementary Effector T cells in the tumor       |





| Reaction Number | Reaction Description                                                                                                                                                 |
|-----------------|----------------------------------------------------------------------------------------------------------------------------------------------------------------------|
| 359             | CD80 expression threshold by the Effector T cells interacting with the T3 subtype of cancer cells in the tumor                                                       |
| 360             | Interaction at the immunological synapse between PD-L2 expressed by the T4 subtype of cancer cells and PD-1 on the complementary Effector T cells in the tumor       |
| 361             | Interaction at the immunological synapse between PD-1 expressed by the Effector T cells interacting with the T4 subtype of cancer cells and Anti-PD-1 in the tumor   |
| 362             | PD-1 expression threshold by the Effector T cells interacting with the T4 subtype of cancer cells in the tumor                                                       |
| 363             | Interaction at the immunological synapse between CD80 expressed by the T5 subtype of cancer cells and PD-L1 on the complementary Effector T cells in the tumor       |
| 364             | Interaction at the immunological synapse between PD-L1 expressed by the Effector T cells interacting with the T5 subtype of cancer cells and Anti-PD-L1 in the tumor |
| 365             | PD-L1 expression threshold by the Effector T cells interacting with the T5 subtype of cancer cells in the tumor                                                      |
| 366             | Interaction at the immunological synapse between PD-1 expressed by the T6 subtype of cancer cells and PD-L1 on the complementary Effector T cells in the tumor       |
| 367             | Interaction at the immunological synapse between PD-L1 expressed by the Effector T cells interacting with the T6 subtype of cancer cells and Anti-PD-L1 in the tumor |
| 368             | PD-L1 expression threshold by the Effector T cells interacting with the T6 subtype of cancer cells in the tumor                                                      |
| 369             | Interaction at the immunological synapse between PD-1 expressed by the Effector T cells interacting with the T6 subtype of cancer cells and Anti-PD-1 in the tumor   |
| 370             | PD-1 expression threshold by the Effector T cells interacting with the T6 subtype of cancer cells in the tumor                                                       |
| 371             | CD80 expression threshold by the Effector T cells interacting with the T6 subtype of cancer cells in the tumor                                                       |
| 372             | Interaction at the immunological synapse between PD-1 expressed by the T7 subtype of cancer cells and PD-L1 on the complementary Effector T cells in the tumor       |
| 373             | PD-L1 expression threshold by the Effector T cells interacting with the T7 subtype of cancer cells in the tumor                                                      |
| 374             | Interaction at the immunological synapse between PD-L2 expressed by the T7 subtype of cancer cells and PD-1 on the complementary Effector T cells in the tumor       |
| 375             | PD-1 expression threshold by the Effector T cells interacting with the T7 subtype of cancer cells in the tumor                                                       |
| 376             | Interaction at the immunological synapse between PD-L1 expressed by the T8 subtype of cancer cells and PD-1 on the complementary Effector T cells in the tumor       |
| 377             | Interaction at the immunological synapse between PD-L2 expressed by the T8 subtype of cancer cells and PD-1 on the complementary Effector T cells in the tumor       |
| 378             | PD-1 expression threshold by the Effector T cells interacting with the T8 subtype of cancer cells in the tumor                                                       |
| 379             | CD80 expression threshold by the Effector T cells interacting with the T8 subtype of cancer cells in the tumor                                                       |
| 380             | Interaction at the immunological synapse between CD80 expressed by the T9 subtype of cancer cells and PD-L1 on the complementary Effector T cells in the tumor       |
| 381             | Interaction at the immunological synapse between PD-L1 expressed by the Effector T cells interacting with the T9 subtype of cancer cells and Anti-PD-L1 in the tumor |
| 382             | PD-L1 expression threshold by the Effector T cells interacting with the T9 subtype of cancer cells in the tumor                                                      |
| 383             | Turnover of resting macrophages                                                                                                                                      |
| 384             | Phagocytosis of tumor debris by resting APCs in the lymph node                                                                                                       |
| 385             | Transport of tumor debris from the tumor to the lymph node                                                                                                           |
| 386             | Decay of tumor debris in the tumor                                                                                                                                   |
| 387             | The distribution of tumor debris away from any of the considered lymph nodes                                                                                         |
| 388             | Accounting for the distribution of tumor debris from the tumor to the lymph nodes other than the lymph node compartment in the model                                 |
| 389             | Natural turnover of cancer cells in the tumor                                                                                                                        |
| 390             | CD80 expression threshold by the mAPCs interacting with the T Regulatory cells in the tumor                                                                          |
| 391             | Interaction at the immunological synapse between CD80 expressed by the Effector T cells and PD-L1 on the T Regulatory cells in the tumor                             |
| 392             | CD80 expression threshold by the Effector T cells interacting with the T Regulatory cells in the tumor                                                               |
| 393             | CD80 expression threshold by the Effector T cells interacting with the MDSCs in the tumor                                                                            |
| 394             | CD86 expression threshold by the mAPCs interacting with the T Regulatory cells in the tumor                                                                          |
| 395             | Flow of Anti-CTLA-4 mAb between the tumor and lymph node                                                                                                             |
| 396             | Interaction at the immunological synapse between CD80 expressed by the mAPCs and CTLA-4 on the T Regulatory cells in the tumor                                       |
| 397             | Interaction at the immunological synapse between CD86 expressed by the mAPCs and CTLA-4 on the T Regulatory cells in the tumor                                       |
| 398             | Interaction at the immunological synapse between CTLA-4 expressed by the T Regulatory cells and Anti-CTLA-4 in the tumor                                             |
| 399             | CTLA-4 expression threshold by the T Regulatory cells interacting with the mAPCs in the tumor                                                                        |
| 400             | Turnover of Effector T cells in the tumor                                                                                                                            |
| 401             | Apoptosis of Effector T cells following complete cancer cell death in the tumor                                                                                      |
| 402             | Conversion of Effector T cells into Resident Effector Memory cells following complete cancer cell death in the tumor                                                 |
| 403             | Association of Effector T cells with cancer cells in the tumor                                                                                                       |
| 404             | Turnover of arrested Effector T cells in Tumor vasculature                                                                                                           |
| 405             | Extravasation of arrested Effector T cells into Tumor interstitium                                                                                                   |
| 406             | Turnover of bound Effector T cells in Tumor vasculature                                                                                                              |
| 407             | Arrest of bound Effector T cells in the Tumor vasculature                                                                                                            |
| 408             | Detachment of bound Effector T cells in the Tumor vasculature                                                                                                        |

| Reaction Number | Reaction Description                                                                                                                                                  |
|-----------------|-----------------------------------------------------------------------------------------------------------------------------------------------------------------------|
| 409             | Binding or free Effector T cells to the Tumor vasculature                                                                                                             |
| 410             | Trafficking of free Effector T cells from the Tumor vasculature to the Lungs vasculature                                                                              |
| 411             | Turnover of free Effector T cells in Tumor vasculature                                                                                                                |
| 412             | Transport of mAPCs from the tumor to the lymph node                                                                                                                   |
| 413             | Accounting for the distribution of mAPCs from the tumor to the lymph nodes other than the lymph node compartment in the model                                         |
| 414             | The distribution of mAPCs away from any of the considered lymph nodes                                                                                                 |
| 415             | CD80 expression by mAPCs interacting with the T Regulatory cells in the tumor                                                                                         |
| 416             | CD86 expression by mAPCs interacting with the T Regulatory cells in the tumor                                                                                         |
| 417             | Association of Effector T cells with MDSCs in the tumor                                                                                                               |
| 418             | PD-1 expression by MDSCs interacting with the Effector T cells in the tumor                                                                                           |
| 419             | PD-L1 expression by MDSCs interacting with the Effector T cells in the tumor                                                                                          |
| 420             | Dissociation of MDSCs from Effector T cells with inactivation of the latter in the tumor                                                                              |
| 421             | Dissociation of MDSCs from Effector T cells without inactivation of the latter in the tumor                                                                           |
| 422             | Distribution of Anti-PD-1 mAb between Tumor and Lymph Node                                                                                                            |
| 423             | Interaction at the immunological synapse between PD-1 expressed by the T14 subtype of cancer cells and Anti-PD-1 in the tumor                                         |
| 424             | Interaction at the immunological synapse between PD-1 expressed by the T2 subtype of cancer cells and Anti-PD-1 in the tumor                                          |
| 425             | Interaction at the immunological synapse between PD-1 expressed by the T7 subtype of cancer cells and Anti-PD-1 in the tumor                                          |
| 426             | Interaction at the immunological synapse between PD-1 expressed by the T9 subtype of cancer cells and Anti-PD-1 in the tumor                                          |
| 427             | Interaction at the immunological synapse between PD-1 expressed by the Effector T cells interacting with the T10 subtype of cancer cells and Anti-PD-1 in the tumor   |
| 428             | Interaction at the immunological synapse between PD-1 expressed by the Effector T cells interacting with the T11 subtype of cancer cells and Anti-PD-1 in the tumor   |
| 429             | Interaction at the immunological synapse between PD-1 expressed by the Effector T cells interacting with the T12 subtype of cancer cells and Anti-PD-1 in the tumor   |
| 430             | Interaction at the immunological synapse between PD-1 expressed by the Effector T cells interacting with the T14 subtype of cancer cells and Anti-PD-1 in the tumor   |
| 431             | Interaction at the immunological synapse between PD-1 expressed by the Effector T cells interacting with the T7 subtype of cancer cells and Anti-PD-1 in the tumor    |
| 432             | Interaction at the immunological synapse between PD-1 expressed by the Effector T cells interacting with the T8 subtype of cancer cells and Anti-PD-1 in the tumor    |
| 433             | Interaction at the immunological synapse between PD-1 expressed by the Effector T cells interacting with the T Regulatory cells and Anti-PD-1 in the tumor            |
| 434             | Interaction at the immunological synapse between PD-1 expressed by the MDSCs interacting with Effector T cells and Anti-PD-1 in the tumor                             |
| 435             | Interaction at the immunological synapse between PD-L1 expressed by the Effector T cells and PD-1 on the MDSCs in the tumor                                           |
| 436             | PD-1 expression threshold by the MDSCs interacting with the Effector T cells in the tumor                                                                             |
| 437             | Interaction at the immunological synapse between PD-1 expressed by the Effector T cells and PD-L1 on the T Regulatory cells in the tumor                              |
| 438             | PD-1 expression threshold by the Effector T cells interacting with the T Regulatory cells in the tumor                                                                |
| 439             | Interaction at the immunological synapse between PD-1 expressed by the Effector T cells interacting with the MDSCs and Anti-PD-1 in the tumor                         |
| 440             | PD-1 expression threshold by the Effector T cells interacting with the MDSCs in the tumor                                                                             |
| 441             | Interaction at the immunological synapse between PD-1 expressed by the T Regulatory cells interacting with the Effector T cells and Anti-PD-1 in the tumor            |
| 442             | PD-1 expression threshold by the T Regulatory cells interacting with the Effector T cells in the tumor                                                                |
| 443             | Distribution of Anti-PD-L1 mAb between Tumor and Lymph Node                                                                                                           |
| 444             | Interaction at the immunological synapse between PD-L1 expressed by the T3 subtype of cancer cells and Anti-PD-L1 in the tumor                                        |
| 445             | Interaction at the immunological synapse between PD-L1 expressed by the Effector T cells interacting with the T13 subtype of cancer cells and Anti-PD-L1 in the tumor |
| 446             | Interaction at the immunological synapse between PD-L1 expressed by the Effector T cells interacting with the T2 subtype of cancer cells and Anti-PD-L1 in the tumor  |
| 447             | Interaction at the immunological synapse between PD-L1 expressed by the Effector T cells interacting with the T7 subtype of cancer cells and Anti-PD-L1 in the tumor  |
| 448             | Interaction at the immunological synapse between PD-L1 expressed by the Effector T cells interacting with the T Regulatory cells and Anti-PD-L1 in the tumor          |
| 417             | Interaction at the immunological synapse between PD-L1 expressed by the Effector T cells interacting with the MDSCs and Anti-PD-L1 in the tumor                       |
| 418             | Interaction at the immunological synapse between CD80 expressed by the Effector T cells and PD-L1 on the MDSCs in the tumor                                           |
| 419             | Interaction at the immunological synapse between PD-1 expressed by the Effector T cells and PD-L1 on the MDSCs in the tumor                                           |

| Reaction Number | Reaction Description                                                                                                                                         |
|-----------------|--------------------------------------------------------------------------------------------------------------------------------------------------------------|
| 420             | Interaction at the immunological synapse between PD-L1 expressed by the MDSCs interacting with the Effector T cells and Anti-PD-L1 in the tumor              |
| 421             | PD-L1 expression threshold by the MDSCs interacting with the Effector T cells in the tumor                                                                   |
| 422             | Interaction at the immunological synapse between PD-L1 expressed by the Effector T cells and PD-1 on the T Regulatory cells in the tumor                     |
| 423             | PD-L1 expression threshold by the Effector T cells interacting with the T Regulatory cells in the tumor                                                      |
| 424             | PD-1 expression threshold by the Effector T cells interacting with the MDSCs in the tumor                                                                    |
| 425             | Interaction at the immunological synapse between PD-L1 expressed by the T Regulatory cells interacting with the Effector T cells and Anti-PD-L1 in the tumor |
| 426             | PD-1 expression threshold by the T Regulatory cells interacting with the Effector T cells in the tumor                                                       |
| 427             | Recovery of Effector T cells from the delay state following interaction with cancer cells in the tumor                                                       |
| 428             | Generation of cancer debris by killing of the cancer cells by the Effector T cells in the tumor                                                              |
| 429             | Dissociation of Effector T cells from the cancer cells into a delay state in the tumor                                                                       |
| 430             | Inactivation of Effector T cells as a result of interactions with the cancer cells in the tumor                                                              |
| 431             | CD80 expression by Effector T cells interacting with the MDSCs in the tumor                                                                                  |
| 432             | PD-1 expression by Effector T cells interacting with the MDSCs in the tumor                                                                                  |
| 433             | PD-L1 expression by Effector T cells interacting with the MDSCs in the tumor                                                                                 |
| 434             | CD80 expression by Effector T cells interacting with the T Regulatory cells in the tumor                                                                     |
| 435             | PD-1 expression by Effector T cells interacting with the T Regulatory cells in the tumor                                                                     |
| 436             | PD-L1 expression by Effector T cells interacting with the T Regulatory cells in the tumor                                                                    |
| 437             | Association of Effector T cells with T Regulatory cells in the tumor                                                                                         |
| 438             | CTLA-4 expression by T Regulatory cells interacting with the mAPCs in the tumor                                                                              |
| 439             | PD-1 expression by T Regulatory cells interacting with the Effector T cells in the tumor                                                                     |
| 440             | PD-L1 expression by T Regulatory cells interacting with the Effector T cells in the tumor                                                                    |
| 441             | Dissociation of T Regulatory cells from Effector T cells with inactivation of the latter in the tumor                                                        |
| 442             | Dissociation of T Regulatory cells from Effector T cells without inactivation of the latter in the tumor                                                     |

Table S3 – Model Reaction and Rate Descriptions (End)

Table S4 – Definition of species in the model (Start)

| Compartment Location | Variable Name       | Units | Variable Definition                                                                                                               |
|----------------------|---------------------|-------|-----------------------------------------------------------------------------------------------------------------------------------|
| Blood-Lymph          | CTLA4_mabB          | mole  | Anti-CTLA-4 antibody in the blood                                                                                                 |
| Blood-Lymph          | CTLA4_mabB_ugml     | µg/ml | Serum concentration of Anti-CTLA-4                                                                                                |
| Blood-Lymph          | PD1_mabb            | mole  | Anti-PD-1 antibody in the blood                                                                                                   |
| Blood-Lymph          | PDL1_mabb           | mole  | Anti-PD-L1 antibody in the blood                                                                                                  |
| Blood-Lymph          | PDL1_mabB_ugml      | µg/ml | Serum concentration of Anti-PD-L1                                                                                                 |
| Blood-Lymph          | PD1_mabB_ugml       | µg/ml | Serum concentration of Anti-PD-1                                                                                                  |
| Blood-Lymph          | Effector_TB         | cell  | Effector T cells that have been generated from all the lymph nodes considered that have migrated into the blood                   |
| Blood-Lymph          | Effector_T_TOTAL    | cell  | The total number of Effector T cells present that have exited the lymph nodes                                                     |
| Blood-Lymph          | Effector_T_TB       | cell  | Effector T cells that have been generated from all the lymph nodes considered that are in the process of migrating into the blood |
| Lungs                | EffT_f_LungsVasc    | cell  | Free effector T cells in the Lung vasculature                                                                                     |
| Lungs                | EffT_r_LungsVasc    | cell  | Bound effector T cells in the Lung vasculature                                                                                    |
| Lungs                | EffT_AR_LungsVasc   | cell  | Arrested effector T cells in the Lung vasculature                                                                                 |
| Lungs                | EffT_LungsEx        | cell  | Effector T cells in the Lung interstitium                                                                                         |
| Lungs                | Lung_Free_Sites     | cell  | Available binding sites for cells in the Lung vasculature                                                                         |
| Liv_Spln_GI          | EffT_Liver_f_Vasc   | cell  | Free effector T cells in the Liver vasculature                                                                                    |
| Liv_Spln_GI          | EffT_LiverEx        | cell  | Effector T cells in the Liver interstitium                                                                                        |
| Liv_Spln_GI          | EffT_Liver_b_Vasc   | cell  | Bound effector T cells in the Liver vasculature                                                                                   |
| Liv_Spln_GI          | EffT_Liver_AR_Vasc  | cell  | Arrested effector T cells in the Liver vasculature                                                                                |
| Liv_Spln_GI          | Liver_Free_Sites    | cell  | Available binding sites for cells in the Liver vasculature                                                                        |
| Liv_Spln_GI          | EffT_Spleen_f_Vasc  | cell  | Free effector T cells in the Spleen vasculature                                                                                   |
| Liv_Spln_GI          | EffT_GI_f_Vasc      | cell  | Free effector T cells in the GI vasculature                                                                                       |
| Liv_Spln_GI          | EffT_SpleenEx       | cell  | Effector T cells in the Spleen interstitium                                                                                       |
| Liv_Spln_GI          | EffT_Spleen_b_Vasc  | cell  | Bound effector T cells in the Spleen vasculature                                                                                  |
| Liv_Spln_GI          | EffT_Spleen_AR_Vasc | cell  | Arrested effector T cells in the Spleen vasculature                                                                               |
| Liv_Spln_GI          | Spleen_Free_Sites   | cell  | Available binding sites for cells in the Spleen vasculature                                                                       |
| Lymph_Node           | Naive_T             | cell  | Naïve T cells that undergo the first phase of priming in the Lymph Nodes                                                          |
| Lymph_Node           | Primed_Naive_T      | cell  | Primed Naïve T cells that undergo the second phase of priming in the Lymph Nodes                                                  |

| Compartment Location | Variable Name      | Units   | Variable Definition                                                                                                                                                         |
|----------------------|--------------------|---------|-----------------------------------------------------------------------------------------------------------------------------------------------------------------------------|
| Lymph_Node           | PNT_Int_CD28       | mole    | CD28 expressed by interacting Primed Naive T cells engaged in the second priming phase                                                                                      |
| Lymph_Node           | mAPC               | cell    | Total number of mature antigen presenting cells (mAPCs) in the lymph node compartment                                                                                       |
| Lymph_Node           | Effector_T         | cell    | Effector T cells that are generate in the lymph node compartment (considering one lymph node)                                                                               |
| Lymph_Node           | CTLA4_mab          | mole    | Anti-CTLA-4 antibody in the lymph node                                                                                                                                      |
| Lymph_Node           | Naive_T0           | cell    | Naive T cells that can undergo priming in the lymph node                                                                                                                    |
| Lymph_Node           | Prolif_Naive_T     | cell    | Proliferating Naive T cells that have undergone the second phase of priming in the lymph node                                                                               |
| Lymph_Node           | Anergic_Naive_T    | cell    | Primed Naive T cells that do not undergo proliferation following the second phase of priming and are deemed to be anergic T cells in the lymph node                         |
| Lymph_Node           | PD1_mabLN_ugml     | µg/ml   | Concentration of anti-PD-1 antibody in the lymph node                                                                                                                       |
| Lymph_Node           | CTLA4_mab_ugml     | µg/ml   | Concentration of anti-CTLA-4 antibody in the lymph node                                                                                                                     |
| Lymph_Node           | PDL1_mabLN_ugml    | µg/ml   | Concentration of anti-PD-L1 antibody in the lymph node                                                                                                                      |
| Lymph_Node           | EffT_LN_ExRec      | cell    | Effector T cells in the lymph node interstitium                                                                                                                             |
| Lymph_Node           | EffT_LN_f_Vasc     | cell    | Free effector T cells in the lymph node vasculature                                                                                                                         |
| Lymph_Node           | mAPC1              | cell    | mAPCs in lymph node interacting with T regulatory cells                                                                                                                     |
| Lymph_Node           | Naive_T2           | cell    | Naive T cells in the lymph node interacting with T regulatory cells                                                                                                         |
| Lymph_Node           | Primed_Naive_T2    | cell    | Primed naive T cells in the lymph node interacting with T regulatory cells                                                                                                  |
| Lymph_Node           | mAPC_cells_per_ml  | cell/ml | Calculation of mAPC in the lymph node                                                                                                                                       |
| Lymph_Node           | PD1_mab            | mole    | Anti-PD-1 antibody in the lymph node                                                                                                                                        |
| Lymph_Node           | PDL1_mab           | mole    | Anti-PD-L1 antibody in the lymph node                                                                                                                                       |
| Lymph_Node           | Naive_T1           | cell    | Naive T cells engaged in the first priming phase in the lymph node                                                                                                          |
| Lymph_Node           | Primed_Naive_T1    | cell    | Primed Naive T cells engaged in the second priming phase in the lymph node                                                                                                  |
| Lymph_Node           | mAPC_Total_Calc_Pr | cell    | mAPCs in the lymph node that are not engaged in priming                                                                                                                     |
| Lymph_Node           | Total_T_CD8-CD4    | cell    | Total number of all T cells in the lymph node                                                                                                                               |
| Lymph_Node           | PNT1_Int           | cell    | Primed Naive T cells engaged in the second priming phase in the lymph node that are accounting for the expression of immune checkpoints                                     |
| Lymph_Node           | PNT_CTLA4          | mole    | CTLA-4 expressed by interacting Primed Naive T cells engaged in the second priming phase                                                                                    |
| Lymph_Node           | mAPC_Int_P1        | cell    | mAPCs interacting with Naive T cells in the first phase of priming                                                                                                          |
| Lymph_Node           | mAPC_Int_P2        | cell    | mAPCs interacting with Primed Naive T cells in the second phase of priming                                                                                                  |
| Lymph_Node           | mAPC_Int_P2_CD80   | mole    | CD80 receptors expressed by mAPCs that are involved in the second priming phase interactions                                                                                |
| Lymph_Node           | mAPC_Int_P2_CD86   | mole    | CD86 receptors expressed by mAPCs that are involved in the second priming phase interactions                                                                                |
| Lymph_Node           | POS_Sig_PNT_CD80   | mole    | Receptor-receptor interactions at the immunological synapse between CD28 expressed on Primed Naive T cells and CD80 expressed on mAPCs during the second phase of priming   |
| Lymph_Node           | POS_Sig_PNT_CD86   | mole    | Receptor-receptor interactions at the immunological synapse between CD28 expressed on Primed Naive T cells and CD86 expressed on mAPCs during the second phase of priming   |
| Lymph_Node           | NEG_Sig_PNT_CD80   | mole    | Receptor-receptor interactions at the immunological synapse between CTLA-4 expressed on Primed Naive T cells and CD80 expressed on mAPCs during the second phase of priming |
| Lymph_Node           | NEG_Sig_PNT_CD86   | mole    | Receptor-receptor interactions at the immunological synapse between CTLA-4 expressed on Primed Naive T cells and CD86 expressed on mAPCs during the second phase of priming |
| Lymph_Node           | CTLA4_mAb_CTLA4    | mole    | Heterogeneous receptor-antibody interactions at the immunological synapse between CTLA-4 expressed on Primed Naive T cells during the second priming phase and              |

| Compartment Location | Variable Name     | Units | Variable Definition                                                                                                                                                                                                                           |
|----------------------|-------------------|-------|-----------------------------------------------------------------------------------------------------------------------------------------------------------------------------------------------------------------------------------------------|
|                      |                   |       | Anti-CTLA-4 mAb delivered to the lymph node by way of IV injection into the blood                                                                                                                                                             |
| Lymph_Node           | mAPC_Int_P2_PDL1  | mole  | PD-L1 receptors expressed by mAPCs that are involved in the second priming phase interactions                                                                                                                                                 |
| Lymph_Node           | mAPC_Int_P2_PDL2  | mole  | PD-L2 receptors expressed by mAPCs that are involved in the second priming phase interactions                                                                                                                                                 |
| Lymph_Node           | mAPC_Int_P2_PD1   | mole  | PD-1 receptors expressed by mAPCs that are involved in the second priming phase interactions                                                                                                                                                  |
| Lymph_Node           | PNT_Int_CD80      | mole  | CD80 expressed by interacting Primed Naive T cells engaged in the second priming phase                                                                                                                                                        |
| Lymph_Node           | PNT_Int_PD1       | mole  | PD-1 expressed by interacting Primed Naive T cells engaged in the second priming phase                                                                                                                                                        |
| Lymph_Node           | PNT_Int_PDL1      | mole  | PD-L1 expressed by interacting Primed Naive T cells engaged in the second priming phase                                                                                                                                                       |
| Lymph_Node           | PNT_CD80-PDL1     | mole  | Receptor-receptor interactions at the immunological synapse between CD80 expressed on Primed Naive T cells and PD-L1 expressed on mAPCs during the second phase of priming                                                                    |
| Lymph_Node           | PNT_PD1-PDL2      | mole  | Receptor-receptor interactions at the immunological synapse between PD-1 expressed on Primed Naive T cells and PD-L2 expressed on mAPCs during the second phase of priming                                                                    |
| Lymph_Node           | PNT_PD1-PDL1      | mole  | Receptor-receptor interactions at the immunological synapse between PD-1 expressed on Primed Naive T cells and PD-L1 expressed on mAPCs during the second phase of priming                                                                    |
| Lymph_Node           | PNT_PDL1-CD80     | mole  | Receptor-receptor interactions at the immunological synapse between PD-L1 expressed on Primed Naive T cells and CD80 expressed on mAPCs during the second phase of priming                                                                    |
| Lymph_Node           | PNT_PDL1-PD1      | mole  | Receptor-receptor interactions at the immunological synapse between PD-L1 expressed on Primed Naive T cells and PD-1 expressed on mAPCs during the second phase of priming                                                                    |
| Lymph_Node           | PDL1mAb-PNT_PDL1  | mole  | Heterogenous receptor-antibody interactions at the immunological synapse between PD-L1 expressed on Primed Naive T cells during the second priming phase and Anti-PD-L1 mAb delivered to the lymph node by way of IV injection into the blood |
| Lymph_Node           | PDL1mAb-mAPC_PDL1 | mole  | Heterogeneous receptor-antibody interactions at the immunological synapse between PD-L1 expressed on mAPCs during the second priming phase and Anti-PD-L1 mAb delivered to the lymph node by way of IV injection into the blood               |
| Lymph_Node           | PD1mAb_mAPC_PD1   | mole  | Heterogeneous receptor-antibody interactions at the immunological synapse between PD-1 expressed on mAPCs during the second priming phase and Anti-PD-1 mAb delivered to the lymph node by way of IV injection into the blood                 |
| Lymph_Node           | PD1mAb_PNT_PD1    | mole  | Heterogeneous receptor-antibody interactions at the immunological synapse between PD-1 expressed on Primed Naive T cells during the second priming phase and Anti-PD-1 mAb delivered to the lymph node by way of IV injection into the blood  |
| Lymph_Node           | mAPC_PD1          | mole  | Total PD-1 expression by all mAPCs in the lymph node                                                                                                                                                                                          |
| Lymph_Node           | mAPC_PDL2         | mole  | Total PD-L2 expression by all mAPCs in the lymph node                                                                                                                                                                                         |
| Lymph_Node           | mAPC_PDL1         | mole  | Total PD-L1 expression by all mAPCs in the lymph node                                                                                                                                                                                         |
| Lymph_Node           | mAPC_CD86         | mole  | Total CD86 expression by all mAPCs in the lymph node                                                                                                                                                                                          |
| Lymph_Node           | mAPC_CD80         | mole  | Total CD80 expression by all mAPCs in the lymph node                                                                                                                                                                                          |
| Lymph_Node           | TregLN-NT         | cell  | T Regulatory cells in the lymph node that have engaged in interacting with Naïve T cells                                                                                                                                                      |
| Lymph_Node           | TregLN-PNT        | cell  | T Regulatory cells in the lymph node that have engaged in interacting with Primed Naïve T cells                                                                                                                                               |
| Lymph_Node           | TregLN_mAPC       | cell  | T Regulatory cells in the lymph node that have engaged in interacting with mAPCs                                                                                                                                                              |

| Compartment Location | Variable Name    | Units | Variable Definition                                                                                                                                                                                            |
|----------------------|------------------|-------|----------------------------------------------------------------------------------------------------------------------------------------------------------------------------------------------------------------|
| Lymph_Node           | TregLN           | cell  | Total number of T Regulatory cells that able to engage with other cell types in the lymph node                                                                                                                 |
| Lymph_Node           | Tr-mAPC_CTLA4    | mole  | CTLA-4 receptors expressed by T Regulatory cells in the lymph node                                                                                                                                             |
| Lymph_Node           | Tr-PNT_PD1       | mole  | PD-1 receptors expressed by T Regulatory cells in the lymph node                                                                                                                                               |
| Lymph_Node           | Tr-PNT_PDL1      | mole  | PD-L1 receptors expressed by T Regulatory cells in the lymph node                                                                                                                                              |
| Lymph_Node           | PNT-Tr_PDL1      | mole  | PD-L1 receptors expressed by Primed Naïve T cells in the lymph node during engagement with T Regulatory cells                                                                                                  |
| Lymph_Node           | PNT-Tr_PD1       | mole  | PD-1 receptors expressed by Primed Naïve T cells in the lymph node during engagement with T Regulatory cells                                                                                                   |
| Lymph_Node           | PNT-Tr_CD80      | mole  | CD80 receptors expressed by Primed Naïve T cells in the lymph node during engagement with T Regulatory cells                                                                                                   |
| Lymph_Node           | TrALN_CT_CD80    | mole  | Receptor-receptor interactions at the immunological synapse between CTLA-4 expressed on T Regulatory cells and CD80 expressed on mAPCs in the lymph node                                                       |
| Lymph_Node           | TrALN_CT_CD86    | mole  | Receptor-receptor interactions at the immunological synapse between CTLA-4 expressed on T Regulatory cells and CD86 expressed on mAPCs in the lymph node                                                       |
| Lymph_Node           | TrPNT_PD1-L1     | mole  | Receptor-receptor interactions at the immunological synapse between PD-1 expressed on T Regulatory cells and PD-L1 expressed on Primed Naïve T cells in the lymph node                                         |
| Lymph_Node           | TrPNT_PDL1-PD1   | mole  | Receptor-receptor interactions at the immunological synapse between PD-L1 expressed on T Regulatory cells and PD-1 expressed on Primed Naïve T cells in the lymph node                                         |
| Lymph_Node           | TrPNT_PDL1-CD80  | mole  | Receptor-receptor interactions at the immunological synapse between PD-L1 expressed on T Regulatory cells and CD80 expressed on Primed Naïve T cells in the lymph node                                         |
| Lymph_Node           | TrALN_CT_aCT     | mole  | Heterogeneous receptor-antibody interactions at the immunological synapse between CTLA-4 expressed on T Regulatory cells and Anti-CTLA-4 mAb delivered to the lymph node by way of IV injection into the blood |
| Lymph_Node           | TrPNT_PD1_aPD1   | mole  | Heterogeneous receptor-antibody interactions at the immunological synapse between PD-1 expressed on T Regulatory cells and Anti-PD-1 mAb delivered to the lymph node by way of IV injection into the blood     |
| Lymph_Node           | PNTTr_PDL1_aPDL1 | mole  | Heterogeneous receptor-antibody interactions at the immunological synapse between PD-L1 expressed on Primed Naïve T cells and Anti-PD-L1 mAb delivered to the lymph node by way of IV injection into the blood |
| Lymph_Node           | TrPNT_PDL1_aPDL1 | mole  | Heterogeneous receptor-antibody interactions at the immunological synapse between PD-L1 expressed on T Regulatory cells and Anti-PD-L1 mAb delivered to the lymph node by way of IV injection into the blood   |
| Lymph_Node           | PNTTr_PD1_aPD1   | mole  | Heterogeneous receptor-antibody interactions at the immunological synapse between PD-1 expressed on Primed Naïve T cells and Anti-PD-1 mAb delivered to the lymph node by way of IV injection into the blood   |
| Lymph_Node           | Tr-mAPC_CD80     | mole  | CD80 receptors expressed by mAPCs that are interacting with T Regulatory cells in the lymph node                                                                                                               |
| Lymph_Node           | Tr-mAPC_CD86     | mole  | CD86 receptors expressed by mAPCs that are interacting with T Regulatory cells in the lymph node                                                                                                               |
| Lymph_Node           | TregLN_mAPC1     | cell  | T Regulatory cells in the lymph node that have engaged in interacting with mAPCs in the lymph node that are accounting for the expression of immune checkpoints                                                |
| Lymph_Node           | TregLN-PNT1      | cell  | T Regulatory cells in the lymph node that have engaged in interacting with Primed Naïve T cells in the lymph node that are accounting for the expression of immune checkpoints                                 |
| Lymph_Node           | C_DebrisLN       | cell  | Cancer debris that has been transported to the lymph node                                                                                                                                                      |
| Lymph_Node           | APCLN            | cell  | Resident antigen presenting cells in the lymph node that have not yet phagocytosed tumor debris                                                                                                                |

| Compartment Location | Variable Name      | Units | Variable Definition                                                                                                                                                 |
|----------------------|--------------------|-------|---------------------------------------------------------------------------------------------------------------------------------------------------------------------|
| Lymph_Node           | TrLN_CTLA4         | mole  | CTLA-4 expressed on the surface of non-interacting T Regulatory cells                                                                                               |
| Lymph_Node           | TrLN_CT_aCT        | mole  | Receptor-antibody interactions between CTLA-4 expressed on T Regulatory cells and Anti-CTLA-4 mAb delivered to the lymph node by way of IV injection into the blood |
| Lymph_Node           | PNT1_Int1          | cell  | Naive T cells undergoing the first priming phase in the lymph node that are accounting for the expression of immune checkpoints                                     |
| Lymph_Node           | NT1_Int1           | cell  | Naive T cells undergoing the first priming phase in the lymph node that are accounting for the expression of CD28                                                   |
| Lymph_Node           | NT_Int_CD28        | mole  | CD28 expressed to the immunological synapse of Naive T cells that are undergoing the first phase of priming                                                         |
| Lymph_Node           | mAPC_Int_P1_CD86   | mole  | CD86 receptors expressed by mAPCs that are involved in the first priming phase interactions with Naive T cells                                                      |
| Lymph_Node           | mAPC_Int_P1_CD80   | mole  | CD80 receptors expressed by mAPCs that are involved in the first priming phase interactions with Naive T cells                                                      |
| Lymph_Node           | POS_Sig_NT_CD86    | mole  | Receptor-receptor interactions at the immunological synapse between CD28 expressed on Naive T cells and CD86 expressed on mAPCs during the first phase of priming   |
| Lymph_Node           | POS_Sig_NT_CD80    | mole  | Receptor-receptor interactions at the immunological synapse between CD28 expressed on Naive T cells and CD86 expressed on mAPCs during the first phase of priming   |
| Peripheral           | CTLA4_leaky_ugml   | µg/ml | Concentration of anti-CTLA-4 in leaky tissue                                                                                                                        |
| Peripheral           | CTLA4_mabP_leaky   | mole  | Amount of anti-CTLA-4 in leaky tissue                                                                                                                               |
| Peripheral           | CTLA4_mabP_tight   | mole  | Amount of anti-CTLA-4 in tight tissue                                                                                                                               |
| Peripheral           | CTLA4_tight_ugml   | µg/ml | Concentration of anti-CTLA-4 in tight tissue                                                                                                                        |
| Peripheral           | EffT_P_f_Vasc      | cell  | Free effector T cells in the peripheral vasculature                                                                                                                 |
| Peripheral           | PD1_leaky_ugml     | µg/ml | Concentration of anti-PD-1 in leaky tissue                                                                                                                          |
| Peripheral           | PD1_mabP_leaky     | mole  | Amount of anti-PD-1 in leaky tissue                                                                                                                                 |
| Peripheral           | PD1_mabP_tight     | mole  | Amount of anti-PD-1 in tight tissue                                                                                                                                 |
| Peripheral           | PD1_tight_ugml     | µg/ml | Concentration of anti-PD-1 in tight tissue                                                                                                                          |
| Peripheral           | PDL1_leaky_ugml    | µg/ml | Concentration of anti-PD-L1 in leaky tissue                                                                                                                         |
| Peripheral           | PDL1_mabP_leaky    | mole  | Amount of anti-PD-L1 in leaky tissue                                                                                                                                |
| Peripheral           | PDL1_mabP_tight    | mole  | Amount of anti-PD-L1 in tight tissue                                                                                                                                |
| Peripheral           | PDL1_tight_ugml    | µg/ml | Concentration of anti-PD-L1 in tight tissue                                                                                                                         |
| Tumor                | PD1_mabt           | mole  | Anti-PD-1 antibody in the tumor compartment                                                                                                                         |
| Tumor                | PDL1_mabt          | mole  | Anti-PD-L1 antibody in the tumor compartment                                                                                                                        |
| Tumor                | CTLA4_mabt         | mole  | Anti-CTLA-4 antibody in the tumor compartment                                                                                                                       |
| Tumor                | Effector_TT        | cell  | Effector T cells in the tumor microenvironment                                                                                                                      |
| Tumor                | Cancer             | cell  | Cancer cells in the tumor                                                                                                                                           |
| Tumor                | Effector_TT_C_Eng  | cell  | Effector T cells that can engage with cancer cells in the tumor microenvironment                                                                                    |
| Tumor                | TC1                | cell  | Cancer cells that are engaged with Effector T cells in the tumor microenvironment                                                                                   |
| Tumor                | T_Recover_Can_Dead | cell  | Effector T cells that have disengaged from the cancer cells in the tumor and are in delay state prior to being able to bind other cancer cells                      |
| Tumor                | C_DebrisT          | cell  | Cancer debris in the tumor that has resulted from cancer death                                                                                                      |
| Tumor                | TC2                | cell  | Effector T cells that are engaged with cancer cells in the tumor microenvironment                                                                                   |
| Tumor                | Monocytes          | cell  | Monocytes that migrate into the tumor and differentiate into APCs                                                                                                   |
| Tumor                | APC_T              | cell  | Antigen Presenting Cells (APCs) in the tumor that can phagocytose tumor debris (tumor antigens) and become mature APCs                                              |
| Tumor                | mAPC_T             | cell  | Mature Antigen Presenting Cells (mAPCs) in the tumor that resulted from APCs that have phagocytosed tumor debris                                                    |
| Tumor                | PD1_mabt           | mole  | Moles of anti-PD-1 antibody in the tumor interstitium                                                                                                               |
| Tumor                | PD1_mabT_ugml      | µg/ml | Concentration of anti-PD-1 antibody in the tumor interstitium                                                                                                       |



| Compartment Location | Variable Name                     | Units | Variable Definition                                                                                                                                      |
|----------------------|-----------------------------------|-------|----------------------------------------------------------------------------------------------------------------------------------------------------------|
| <b>Tumor</b>         | CTLA4_mabt_ugml                   | μg/ml | Concentration of anti-CTLA-4 antibody in the tumor interstitium                                                                                          |
| <b>Tumor</b>         | PDL1_mabT_ugml                    | μg/ml | Concentration of anti-PD-L1 antibody in the tumor interstitium                                                                                           |
| <b>Tumor</b>         | EffT_f_Vasc                       | cell  | Free effector T cells in the tumor vasculature                                                                                                           |
| <b>Tumor</b>         | Tmr_Free_Sites                    | cell  | Available binding sites for cells in the tumor vasculature                                                                                               |
| <b>Tumor</b>         | EffT_b_Vasc                       | cell  | Bound effector T cells in the tumor vasculature                                                                                                          |
| <b>Tumor</b>         | EffT_AR_Vasc                      | cell  | Arrested effector T cells in the tumor vasculature                                                                                                       |
| <b>Tumor</b>         | Cancer1                           | cell  | Cancer cells that can engage with Effector T cells in the tumor                                                                                          |
| <b>Tumor</b>         | T{PD1}{CD80}-{PDL1}C              | cell  | Effector T cells in the tumor that interact with the T3 subgroup of cancer cells expressing PD-L1 only, and other unknown factors                        |
| <b>Tumor</b>         | T{PD1}-{PDL2}C                    | cell  | Effector T cells in the tumor that interact with the T4 subgroup of cancer cells expressing PD-L2 only, and other unknown factors                        |
| <b>Tumor</b>         | T{PDL1}-{PD1}C                    | cell  | Effector T cells in the tumor that interact with the T2 subgroup of cancer cells expressing PD-1 only, and other unknown factors                         |
| <b>Tumor</b>         | T{PDL1}-{CD80}C                   | cell  | Effector T cells in the tumor that interact with the T5 subgroup of cancer cells expressing CD80 only, and other unknown factors                         |
| <b>Tumor</b>         | T{PD1}{L1}{80}-{PD1}{L1}C         | cell  | Effector T cells in the tumor that interact with the T6 subgroup of cancer cells expressing PD-1 and PD-L1 only, and other unknown factors               |
| <b>Tumor</b>         | T{PD1}{80}-{PDL1}{PDL2}C          | cell  | Effector T cells in the tumor that interact with the T8 subgroup of cancer cells expressing PD-L1 and PD-L2 only, and other unknown factors              |
| <b>Tumor</b>         | T{PD1}{L1}-{PD1}{L2}C             | cell  | Effector T cells in the tumor that interact with the T7 subgroup of cancer cells expressing PD-1 and PD-L2 only, and other unknown factors               |
| <b>Tumor</b>         | T{PD1}{L1}{80}-{PD1}{L1}{L2}C     | cell  | Effector T cells in the tumor that interact with the T10 subgroup of cancer cells expressing PD-1, PD-L1 and PD-L2 only, and other unknown factors       |
| <b>Tumor</b>         | T{PDL1}-{CD80}{PD1}C              | cell  | Effector T cells in the tumor that interact with the T9 subgroup of cancer cells expressing CD80 and PD-1 only, and other unknown factors                |
| <b>Tumor</b>         | T{PD1}{L1}-{PDL1}{80}C            | cell  | Effector T cells in the tumor that interact with the T11 subgroup of cancer cells expressing PD-L1 and CD80 only, and other unknown factors              |
| <b>Tumor</b>         | T{PD1}{L1}-{PDL2}{80}C            | cell  | Effector T cells in the tumor that interact with the T12 subgroup of cancer cells expressing PD-L2 and CD80 only, and other unknown factors              |
| <b>Tumor</b>         | T{PD1}{L1}-{PDL1}{80}{L2}C        | cell  | Effector T cells in the tumor that interact with the T13 subgroup of cancer cells expressing PD-L1, CD80 and PD-L2 only, and other unknown factors       |
| <b>Tumor</b>         | T{PD1}{L1}{80}-{PD1}{80}{L1}C     | cell  | Effector T cells in the tumor that interact with the T14 subgroup of cancer cells expressing PD-1, CD80 and PD-L1 only, and other unknown factors        |
| <b>Tumor</b>         | T{PD1}{L1}-{PD1}{80}{PDL2}C       | cell  | Effector T cells in the tumor that interact with the T15 subgroup of cancer cells expressing PD-1, CD80 and PD-L2 only, and other unknown factors        |
| <b>Tumor</b>         | T{PD1}{L1}{80}-{PD1}{80}{L1}{L2}C | cell  | Effector T cells in the tumor that interact with the T16 subgroup of cancer cells expressing PD-1, CD80, PD-L1 and PD-L2 only, and other unknown factors |
| <b>Tumor</b>         | T2=PDL1                           | mole  | PD-L1 expressed by Effector T cells that interact with T2 subgroup of cancer cells                                                                       |
| <b>Tumor</b>         | T3a=PD1                           | mole  | PD-1 expressed by Effector T cells that interact with T3 subgroup of cancer cells                                                                        |
| <b>Tumor</b>         | T4=PD1                            | mole  | PD-1 expressed by Effector T cells that interact with T4 subgroup of cancer cells                                                                        |
| <b>Tumor</b>         | T5=PDL1                           | mole  | PD-L1 expressed by Effector T cells that interact with T5 subgroup of cancer cells                                                                       |
| <b>Tumor</b>         | T3b=CD80                          | mole  | CD80 expressed by Effector T cells that interact with T3 subgroup of cancer cells                                                                        |

| Compartment Location | Variable Name | Units | Variable Definition                                                                                 |
|----------------------|---------------|-------|-----------------------------------------------------------------------------------------------------|
| Tumor                | T7a=PDL1      | mole  | PD-L1 expressed by Effector T cells that interact with T7 subgroup of cancer cells                  |
| Tumor                | T10b=PD1      | mole  | PD-1 expressed by Effector T cells that interact with T10 subgroup of cancer cells                  |
| Tumor                | T7b=PD1       | mole  | PD-1 expressed by Effector T cells that interact with T7 subgroup of cancer cells                   |
| Tumor                | T6a=PDL1      | mole  | PD-L1 expressed by Effector T cells that interact with T6 subgroup of cancer cells                  |
| Tumor                | T6c=CD80      | mole  | CD80 expressed by Effector T cells that interact with T6 subgroup of cancer cells                   |
| Tumor                | T6b=PD1       | mole  | PD-1 expressed by Effector T cells that interact with T6 subgroup of cancer cells                   |
| Tumor                | T11a=PDL1     | mole  | PD-L1 expressed by Effector T cells that interact with T11 subgroup of cancer cells                 |
| Tumor                | T11b=PD1      | mole  | PD-1 expressed by Effector T cells that interact with T11 subgroup of cancer cells                  |
| Tumor                | T10c=CD80     | mole  | CD80 expressed by Effector T cells that interact with T10 subgroup of cancer cells                  |
| Tumor                | T12b=PD1      | mole  | PD-1 expressed by Effector T cells that interact with T12 subgroup of cancer cells                  |
| Tumor                | T13a=PDL1     | mole  | PD-L1 expressed by Effector T cells that interact with T13 subgroup of cancer cells                 |
| Tumor                | T12a=PDL1     | mole  | PD-L1 expressed by Effector T cells that interact with T12 subgroup of cancer cells                 |
| Tumor                | T14c=CD80     | mole  | CD80 expressed by Effector T cells that interact with T14 subgroup of cancer cells                  |
| Tumor                | T15b=PD1      | mole  | PD-1 expressed by Effector T cells that interact with T15 subgroup of cancer cells                  |
| Tumor                | T15a=PDL1     | mole  | PD-L1 expressed by Effector T cells that interact with T15 subgroup of cancer cells                 |
| Tumor                | T13b=PD1      | mole  | PD-1 expressed by Effector T cells that interact with T13 subgroup of cancer cells                  |
| Tumor                | T14b=PD1      | mole  | PD-1 expressed by Effector T cells that interact with T14 subgroup of cancer cells                  |
| Tumor                | T14a=PDL1     | mole  | PD-L1 expressed by Effector T cells that interact with T14 subgroup of cancer cells                 |
| Tumor                | T16b=PD1      | mole  | PD-1 expressed by Effector T cells that interact with T16 subgroup of cancer cells                  |
| Tumor                | T16c=CD80     | mole  | CD80 expressed by Effector T cells that interact with T16 subgroup of cancer cells                  |
| Tumor                | T16a=PDL1     | mole  | PD-L1 expressed by Effector T cells that interact with T16 subgroup of cancer cells                 |
| Tumor                | T8a=PD1       | mole  | PD-1 expressed by Effector T cells that interact with T8 subgroup of cancer cells                   |
| Tumor                | T8b=CD80      | mole  | CD80 expressed by Effector T cells that interact with T8 subgroup of cancer cells                   |
| Tumor                | T9=PDL1       | mole  | PD-L1 expressed by Effector T cells that interact with T9 subgroup of cancer cells                  |
| Tumor                | T10a=PDL1     | mole  | PD-L1 expressed by Effector T cells that interact with T10 subgroup of cancer cells                 |
| Tumor                | C10a=PD1      | mole  | PD-1 expressed by the T10 subtype of cancer cells that interact with Effector T cells in the tumor  |
| Tumor                | C9b=CD80      | mole  | CD80 expressed by the T9 subtype of cancer cells that interact with Effector T cells in the tumor   |
| Tumor                | C9a=PD1       | mole  | PD-1 expressed by the T9 subtype of cancer cells that interact with Effector T cells in the tumor   |
| Tumor                | C8b=PDL2      | mole  | PD-L2 expressed by the T8 subtype of cancer cells that interact with Effector T cells in the tumor  |
| Tumor                | C16a=PD1      | mole  | PD-1 expressed by the T16 subtype of cancer cells that interact with Effector T cells in the tumor  |
| Tumor                | C16c=PDL2     | mole  | PD-L2 expressed by the T16 subtype of cancer cells that interact with Effector T cells in the tumor |
| Tumor                | C16b=PDL1     | mole  | PD-L1 expressed by the T16 subtype of cancer cells that interact with Effector T cells in the tumor |

| Compartment Location | Variable Name      | Units | Variable Definition                                                                                 |
|----------------------|--------------------|-------|-----------------------------------------------------------------------------------------------------|
| Tumor                | C14a=PD1           | mole  | PD-1 expressed by the T14 subtype of cancer cells that interact with Effector T cells in the tumor  |
| Tumor                | C14b=PDL1          | mole  | PD-L1 expressed by the T14 subtype of cancer cells that interact with Effector T cells in the tumor |
| Tumor                | C13b=PDL2          | mole  | PD-L2 expressed by the T13 subtype of cancer cells that interact with Effector T cells in the tumor |
| Tumor                | C15a=PD1           | mole  | PD-1 expressed by the T15 subtype of cancer cells that interact with Effector T cells in the tumor  |
| Tumor                | C15b=PDL2          | mole  | PD-L2 expressed by the T15 subtype of cancer cells that interact with Effector T cells in the tumor |
| Tumor                | C14c=CD80          | mole  | CD80 expressed by the T14 subtype of cancer cells that interact with Effector T cells in the tumor  |
| Tumor                | C12a=PDL2          | mole  | PD-L2 expressed by the T12 subtype of cancer cells that interact with Effector T cells in the tumor |
| Tumor                | C13a=PDL1          | mole  | PD-L1 expressed by the T13 subtype of cancer cells that interact with Effector T cells in the tumor |
| Tumor                | C12b=CD80          | mole  | CD80 expressed by the T12 subtype of cancer cells that interact with Effector T cells in the tumor  |
| Tumor                | C10c=PDL2          | mole  | PD-L2 expressed by the T10 subtype of cancer cells that interact with Effector T cells in the tumor |
| Tumor                | C11b=CD80          | mole  | CD80 expressed by the T11 subtype of cancer cells that interact with Effector T cells in the tumor  |
| Tumor                | C11a=PDL1          | mole  | PD-L1 expressed by the T11 subtype of cancer cells that interact with Effector T cells in the tumor |
| Tumor                | C6b=PDL1           | mole  | PD-L1 expressed by the T6 subtype of cancer cells that interact with Effector T cells in the tumor  |
| Tumor                | C7a=PD1            | mole  | PD-1 expressed by the T7 subtype of cancer cells that interact with Effector T cells in the tumor   |
| Tumor                | C6a=PD1            | mole  | PD-1 expressed by the T6 subtype of cancer cells that interact with Effector T cells in the tumor   |
| Tumor                | C8a=PDL1           | mole  | PD-L1 expressed by the T8 subtype of cancer cells that interact with Effector T cells in the tumor  |
| Tumor                | C10b=PDL1          | mole  | PD-L1 expressed by the T10 subtype of cancer cells that interact with Effector T cells in the tumor |
| Tumor                | C7b=PDL2           | mole  | PD-L2 expressed by the T7 subtype of cancer cells that interact with Effector T cells in the tumor  |
| Tumor                | C5=CD80            | mole  | CD80 expressed by the T5 subtype of cancer cells that interact with Effector T cells in the tumor   |
| Tumor                | C4=PDL2            | mole  | PD-L2 expressed by the T4 subtype of cancer cells that interact with Effector T cells in the tumor  |
| Tumor                | C3=PDL1            | mole  | PD-L1 expressed by the T3 subtype of cancer cells that interact with Effector T cells in the tumor  |
| Tumor                | C2=PD1             | mole  | PD-1 expressed by the T2 subtype of cancer cells that interact with Effector T cells in the tumor   |
| Tumor                | C{PD1}             | cell  | T2 subgroup of cancer cells expressing PD-1 only, and other unknown factors                         |
| Tumor                | C{PDL1}            | cell  | T3 subgroup of cancer cells expressing PD-L1 only, and other unknown factors                        |
| Tumor                | C{PDL2}            | cell  | T4 subgroup of cancer cells expressing PD-L2 only, and other unknown factors                        |
| Tumor                | C{CD80}            | cell  | T5 subgroup of cancer cells expressing CD80 only, and other unknown factors                         |
| Tumor                | C{PD1}{PDL1}       | cell  | T6 subgroup of cancer cells expressing PD-1 and PD-L1 only, and other unknown factors               |
| Tumor                | C{PD1}{PDL2}       | cell  | T7 subgroup of cancer cells expressing PD-1 and PD-L2 only, and other unknown factors               |
| Tumor                | C{PDL1}{PDL2}      | cell  | T8 subgroup of cancer cells expressing PD-L1 and PD-L2 only, and other unknown factors              |
| Tumor                | C{PD1}{CD80}       | cell  | T9 subgroup of cancer cells expressing PD-1 and CD80 only, and other unknown factors                |
| Tumor                | C{PD1}{PDL1}{PDL2} | cell  | T10 subgroup of cancer cells expressing PD-1, PD-L1 and PD-L2 only, and other unknown factors       |
| Tumor                | C{PDL1}{CD80}      | cell  | T11 subgroup of cancer cells expressing PD-L1 and CD80 only, and other unknown factors              |

| Compartment Location | Variable Name                      | Units | Variable Definition                                                                                                                                           |
|----------------------|------------------------------------|-------|---------------------------------------------------------------------------------------------------------------------------------------------------------------|
| Tumor                | $C\{PDL2\}\{CD80\}$                | cell  | T12 subgroup of cancer cells expressing PD-L2 and CD80 only, and other unknown factors                                                                        |
| Tumor                | $C\{PDL1\}\{PDL2\}\{CD80\}$        | cell  | T13 subgroup of cancer cells expressing PD-L1, PDL-L2 and CD80 only, and other unknown factors                                                                |
| Tumor                | $C\{PD1\}\{PDL1\}\{CD80\}$         | cell  | T14 subgroup of cancer cells expressing PD-1, PD-L1 and CD80 only, and other unknown factors                                                                  |
| Tumor                | $C\{PD1\}\{PDL2\}\{CD80\}$         | cell  | T15 subgroup of cancer cells expressing PD-1, PD-L2 and CD80 only, and other unknown factors                                                                  |
| Tumor                | $C\{PD1\}\{PDL1\}\{PDL2\}\{CD80\}$ | cell  | T16 subgroup of cancer cells expressing PD-1, PD-L1, PD-L2 and CD80 only, and other unknown factors                                                           |
| Tumor                | $C13c=CD80$                        | mole  | CD80 expressed by the T13 subtype of cancer cells that interact with Effector T cells in the tumor                                                            |
| Tumor                | $C15c=CD80$                        | mole  | CD80 expressed by the T15 subtype of cancer cells that interact with Effector T cells in the tumor                                                            |
| Tumor                | $C16d=CD80$                        | mole  | CD80 expressed by the T16 subtype of cancer cells that interact with Effector T cells in the tumor                                                            |
| Tumor                | $T2=PDL1:PD1=C2$                   | mole  | Receptor-receptor interactions at the immunological synapse between PD-1 expressed by the T2 subtype of cancer cells and PD-L1 expressed on Effector T cells  |
| Tumor                | $T3a=PD1:PDL1=C3$                  | mole  | Receptor-receptor interactions at the immunological synapse between PD-L1 expressed by the T3 subtype of cancer cells and PD-1 expressed on Effector T cells  |
| Tumor                | $T3b=CD80:PDL1=C3$                 | mole  | Receptor-receptor interactions at the immunological synapse between PD-L1 expressed by the T3 subtype of cancer cells and CD80 expressed on Effector T cells  |
| Tumor                | $T4=PD1:PDL2=C4$                   | mole  | Receptor-receptor interactions at the immunological synapse between PD-L2 expressed by the T4 subtype of cancer cells and PD-1 expressed on Effector T cells  |
| Tumor                | $T5=PDL1:CD80=C5$                  | mole  | Receptor-receptor interactions at the immunological synapse between CD80 expressed by the T5 subtype of cancer cells and PD-L1 expressed on Effector T cells  |
| Tumor                | $T6a=PDL1:PD1=C6a$                 | mole  | Receptor-receptor interactions at the immunological synapse between PD-1 expressed by the T6 subtype of cancer cells and PD-L1 expressed on Effector T cells  |
| Tumor                | $T6c=CD80:PDL1=C6b$                | mole  | Receptor-receptor interactions at the immunological synapse between PD-L1 expressed by the T6 subtype of cancer cells and CD80 expressed on Effector T cells  |
| Tumor                | $T6b=PD1:PDL1=C6b$                 | mole  | Receptor-receptor interactions at the immunological synapse between PD-L1 expressed by the T6 subtype of cancer cells and PD-1 expressed on Effector T cells  |
| Tumor                | $T7a=PDL1:PD1=C7a$                 | mole  | Receptor-receptor interactions at the immunological synapse between PD-1 expressed by the T7 subtype of cancer cells and PD-L1 expressed on Effector T cells  |
| Tumor                | $T7b=PD1:PDL2=C7b$                 | mole  | Receptor-receptor interactions at the immunological synapse between PD-L2 expressed by the T7 subtype of cancer cells and PD-1 expressed on Effector T cells  |
| Tumor                | $T8a=PD1:PDL2=C8b$                 | mole  | Receptor-receptor interactions at the immunological synapse between PD-L2 expressed by the T8 subtype of cancer cells and PD-1 expressed on Effector T cells  |
| Tumor                | $T8a=PD1:PDL1=C8a$                 | mole  | Receptor-receptor interactions at the immunological synapse between PD-L1 expressed by the T8 subtype of cancer cells and PD-1 expressed on Effector T cells  |
| Tumor                | $T8b=CD80:PDL1=C8a$                | mole  | Receptor-receptor interactions at the immunological synapse between PD-L1 expressed by the T8 subtype of cancer cells and CD80 expressed on Effector T cells  |
| Tumor                | $T9=PDL1-PD1=C9a$                  | mole  | Receptor-receptor interactions at the immunological synapse between PD-1 expressed by the T9 subtype of cancer cells and PD-L1 expressed on Effector T cells  |
| Tumor                | $T9=PDL1-CD80=C9b$                 | mole  | Receptor-receptor interactions at the immunological synapse between CD80 expressed by the T9 subtype of cancer cells and PD-L1 expressed on Effector T cells  |
| Tumor                | $T10a=PDL1:PD1=C10a$               | mole  | Receptor-receptor interactions at the immunological synapse between PD-1 expressed by the T10 subtype of cancer cells and PD-L1 expressed on Effector T cells |

| Compartment Location | Variable Name       | Units | Variable Definition                                                                                                                                           |
|----------------------|---------------------|-------|---------------------------------------------------------------------------------------------------------------------------------------------------------------|
| Tumor                | T10b=PD1:PDL1=C10b  | mole  | Receptor-receptor interactions at the immunological synapse between PD-L1 expressed by the T10 subtype of cancer cells and PD-1 expressed on Effector T cells |
| Tumor                | T10b=PD1:PDL2=C10c  | mole  | Receptor-receptor interactions at the immunological synapse between PD-L2 expressed by the T10 subtype of cancer cells and PD-1 expressed on Effector T cells |
| Tumor                | T10c=CD80:PDL1=C10b | mole  | Receptor-receptor interactions at the immunological synapse between PD-L1 expressed by the T10 subtype of cancer cells and CD80 expressed on Effector T cells |
| Tumor                | T11b=PD1:PDL1=C11a  | mole  | Receptor-receptor interactions at the immunological synapse between PD-L1 expressed by the T11 subtype of cancer cells and PD-1 expressed on Effector T cells |
| Tumor                | T11a=PDL1:CD80=C11b | mole  | Receptor-receptor interactions at the immunological synapse between CD80 expressed by the T11 subtype of cancer cells and PD-L1 expressed on Effector T cells |
| Tumor                | T12b=PD1:PDL2=C12a  | mole  | Receptor-receptor interactions at the immunological synapse between PD-L2 expressed by the T12 subtype of cancer cells and PD-1 expressed on Effector T cells |
| Tumor                | T12a=PDL1:CD80=C12b | mole  | Receptor-receptor interactions at the immunological synapse between CD80 expressed by the T12 subtype of cancer cells and PD-L1 expressed on Effector T cells |
| Tumor                | T13b=PD1:PDL1=C13a  | mole  | Receptor-receptor interactions at the immunological synapse between PD-L1 expressed by the T13 subtype of cancer cells and PD-1 expressed on Effector T cells |
| Tumor                | T13a=PDL1:CD80=C13c | mole  | Receptor-receptor interactions at the immunological synapse between CD80 expressed by the T13 subtype of cancer cells and PD-L1 expressed on Effector T cells |
| Tumor                | T13b=PD1:PDL2=C13b  | mole  | Receptor-receptor interactions at the immunological synapse between PD-L2 expressed by the T13 subtype of cancer cells and PD-1 expressed on Effector T cells |
| Tumor                | T14a=PDL1:PD1=C14a  | mole  | Receptor-receptor interactions at the immunological synapse between PD-1 expressed by the T14 subtype of cancer cells and PD-L1 expressed on Effector T cells |
| Tumor                | T14a=PDL1:CD80=C14c | mole  | Receptor-receptor interactions at the immunological synapse between CD80 expressed by the T14 subtype of cancer cells and PD-L1 expressed on Effector T cells |
| Tumor                | T14b=PD1:PDL1=C14b  | mole  | Receptor-receptor interactions at the immunological synapse between PD-L1 expressed by the T14 subtype of cancer cells and PD-1 expressed on Effector T cells |
| Tumor                | T14c=CD80:PDL1=C14b | mole  | Receptor-receptor interactions at the immunological synapse between CD80 expressed by the T14 subtype of cancer cells and PD-L1 expressed on Effector T cells |
| Tumor                | T15a=PDL1:CD80=C15c | mole  | Receptor-receptor interactions at the immunological synapse between CD80 expressed by the T15 subtype of cancer cells and PD-L1 expressed on Effector T cells |
| Tumor                | T15a=PDL1:PD1=C15a  | mole  | Receptor-receptor interactions at the immunological synapse between PD-1 expressed by the T15 subtype of cancer cells and PD-L1 expressed on Effector T cells |
| Tumor                | T15b=PD1:PDL2=C15b  | mole  | Receptor-receptor interactions at the immunological synapse between PD-L2 expressed by the T15 subtype of cancer cells and PD-1 expressed on Effector T cells |
| Tumor                | T16b=PD1:PDL2=C16c  | mole  | Receptor-receptor interactions at the immunological synapse between PD-L2 expressed by the T15 subtype of cancer cells and PD-1 expressed on Effector T cells |
| Tumor                | T16b=PD1:PDL1=C16b  | mole  | Receptor-receptor interactions at the immunological synapse between PD-L1 expressed by the T15 subtype of cancer cells and PD-1 expressed on Effector T cells |
| Tumor                | T16c=CD80:PDL1=C16b | mole  | Receptor-receptor interactions at the immunological synapse between PD-L1 expressed by the T15 subtype of cancer cells and CD80 expressed on Effector T cells |
| Tumor                | T16a=PDL1:PD1=C16a  | mole  | Receptor-receptor interactions at the immunological synapse between PD-1 expressed by the T15 subtype of cancer cells and PD-L1 expressed on Effector T cells |
| Tumor                | T16a=PDL1:CD80=C16d | mole  | Receptor-receptor interactions at the immunological synapse between CD80 expressed by the T15 subtype of cancer cells and PD-L1 expressed on Effector T cells |

| Compartment Location | Variable Name   | Units | Variable Definition                                                                                                                                                                                                                                      |
|----------------------|-----------------|-------|----------------------------------------------------------------------------------------------------------------------------------------------------------------------------------------------------------------------------------------------------------|
| Tumor                | T2=PDL1:aPDL1   | mole  | Heterogeneous receptor-antibody interactions at the immunological synapse between PD-L1 expressed by Effector T cells that interact with the T2 subtype of cancer cells and Anti-PD-L1 mAb delivered to the tumor by way of IV injection into the blood  |
| Tumor                | T3a=PD1:aPD1    | mole  | Heterogeneous receptor-antibody interactions at the immunological synapse between PD-1 expressed by Effector T cells that interact with the T3 subtype of cancer cells and Anti-PD-L1 mAb delivered to the tumor by way of IV injection into the blood   |
| Tumor                | C3=PDL1:aPDL1   | mole  | Heterogeneous receptor-antibody interactions at the immunological synapse between PD-L1 expressed by the T3 subtype of cancer cells and Anti-PD-L1 mAb delivered to the tumor by way of IV injection into the blood                                      |
| Tumor                | T5=PDL1:aPDL1   | mole  | Heterogeneous receptor-antibody interactions at the immunological synapse between PD-L1 expressed by Effector T cells that interact with the T5 subtype of cancer cells and Anti-PD-L1 mAb delivered to the tumor by way of IV injection into the blood  |
| Tumor                | T6a=PDL1:aPDL1  | mole  | Heterogeneous receptor-antibody interactions at the immunological synapse between PD-L1 expressed by Effector T cells that interact with the T6 subtype of cancer cells and Anti-PD-L1 mAb delivered to the tumor by way of IV injection into the blood  |
| Tumor                | C6b=PDL1:aPDL1  | mole  | Heterogeneous receptor-antibody interactions at the immunological synapse between PD-L1 expressed by the T6 subtype of cancer cells and Anti-PD-L1 mAb delivered to the tumor by way of IV injection into the blood                                      |
| Tumor                | T10a=PDL1:aPDL1 | mole  | Heterogeneous receptor-antibody interactions at the immunological synapse between PD-L1 expressed by Effector T cells that interact with the T10 subtype of cancer cells and Anti-PD-L1 mAb delivered to the tumor by way of IV injection into the blood |
| Tumor                | C10b=PDL1:aPDL1 | mole  | Heterogeneous receptor-antibody interactions at the immunological synapse between PD-L1 expressed by the T10 subtype of cancer cells and Anti-PD-L1 mAb delivered to the tumor by way of IV injection into the blood                                     |
| Tumor                | C11a=PDL1:aPDL1 | mole  | Heterogeneous receptor-antibody interactions at the immunological synapse between PD-L1 expressed by the T11 subtype of cancer cells and Anti-PD-L1 mAb delivered to the tumor by way of IV injection into the blood                                     |
| Tumor                | T11a=PDL1:aPDL1 | mole  | Heterogeneous receptor-antibody interactions at the immunological synapse between PD-L1 expressed by Effector T cells that interact with the T11 subtype of cancer cells and Anti-PD-L1 mAb delivered to the tumor by way of IV injection into the blood |
| Tumor                | T12a=PDL1:aPDL1 | mole  | Heterogeneous receptor-antibody interactions at the immunological synapse between PD-L1 expressed by Effector T cells that interact with the T12 subtype of cancer cells and Anti-PD-L1 mAb delivered to the tumor by way of IV injection into the blood |
| Tumor                | T7a=PD1:aPDL1   | mole  | Heterogeneous receptor-antibody interactions at the immunological synapse between PD-L1 expressed by Effector T cells that interact with the T7 subtype of cancer cells and Anti-PD-L1 mAb delivered to the tumor by way of IV injection into the blood  |
| Tumor                | C8a=PDL1:aPDL1  | mole  | Heterogeneous receptor-antibody interactions at the immunological synapse between PD-L1 expressed by the T8 subtype of cancer cells and Anti-PD-L1 mAb delivered to the tumor by way of IV injection into the blood                                      |
| Tumor                | T9=PDL1:aPDL1   | mole  | Heterogeneous receptor-antibody interactions at the immunological synapse between PD-L1 expressed by Effector T cells that interact with the T9 subtype of cancer cells and Anti-PD-L1 mAb delivered to the tumor by way of IV injection into the blood  |

| Compartment Location | Variable Name    | Units | Variable Definition                                                                                                                                                                                                                                      |
|----------------------|------------------|-------|----------------------------------------------------------------------------------------------------------------------------------------------------------------------------------------------------------------------------------------------------------|
| Tumor                | C13a=PD-L1:aPDL1 | mole  | Heterogeneous receptor-antibody interactions at the immunological synapse between PD-L1 expressed by the T13 subtype of cancer cells and Anti-PD-L1 mAb delivered to the tumor by way of IV injection into the blood                                     |
| Tumor                | T13a=PD-L1:aPDL1 | mole  | Heterogeneous receptor-antibody interactions at the immunological synapse between PD-L1 expressed by Effector T cells that interact with the T13 subtype of cancer cells and Anti-PD-L1 mAb delivered to the tumor by way of IV injection into the blood |
| Tumor                | T14a=PD-L1:aPDL1 | mole  | Heterogeneous receptor-antibody interactions at the immunological synapse between PD-L1 expressed by Effector T cells that interact with the T14 subtype of cancer cells and Anti-PD-L1 mAb delivered to the tumor by way of IV injection into the blood |
| Tumor                | C14b=PD-L1:aPDL1 | mole  | Heterogeneous receptor-antibody interactions at the immunological synapse between PD-L1 expressed by the T14 subtype of cancer cells and Anti-PD-L1 mAb delivered to the tumor by way of IV injection into the blood                                     |
| Tumor                | T15a=PD-L1:aPDL1 | mole  | Heterogeneous receptor-antibody interactions at the immunological synapse between PD-L1 expressed by Effector T cells that interact with the T15 subtype of cancer cells and Anti-PD-L1 mAb delivered to the tumor by way of IV injection into the blood |
| Tumor                | T16a=PD-L1:aPDL1 | mole  | Heterogeneous receptor-antibody interactions at the immunological synapse between PD-L1 expressed by Effector T cells that interact with the T16 subtype of cancer cells and Anti-PD-L1 mAb delivered to the tumor by way of IV injection into the blood |
| Tumor                | C16b=PD-L1:aPDL1 | mole  | Heterogeneous receptor-antibody interactions at the immunological synapse between PD-L1 expressed by the T16 subtype of cancer cells and Anti-PD-L1 mAb delivered to the tumor by way of IV injection into the blood                                     |
| Tumor                | C2=PD-1:aPD1     | mole  | Heterogeneous receptor-antibody interactions at the immunological synapse between PD-1 expressed by the T2 subtype of cancer cells and Anti-PD-1 mAb delivered to the tumor by way of IV injection into the blood                                        |
| Tumor                | T4=PD-1:aPD1     | mole  | Heterogeneous receptor-antibody interactions at the immunological synapse between PD-1 expressed by Effector T cells that interact with the T4 subtype of cancer cells and Anti-PD-L1 mAb delivered to the tumor by way of IV injection into the blood   |
| Tumor                | C6a=PD-1:aPD1    | mole  | Heterogeneous receptor-antibody interactions at the immunological synapse between PD-1 expressed by the T6 subtype of cancer cells and Anti-PD-1 mAb delivered to the tumor by way of IV injection into the blood                                        |
| Tumor                | T6b=PD-1:aPD1    | mole  | Heterogeneous receptor-antibody interactions at the immunological synapse between PD-1 expressed by Effector T cells that interact with the T6 subtype of cancer cells and Anti-PD-L1 mAb delivered to the tumor by way of IV injection into the blood   |
| Tumor                | C7a=PD-1:aPD1    | mole  | Heterogeneous receptor-antibody interactions at the immunological synapse between PD-1 expressed by the T7 subtype of cancer cells and Anti-PD-1 mAb delivered to the tumor by way of IV injection into the blood                                        |
| Tumor                | T7b=PD-1:aPD1    | mole  | Heterogeneous receptor-antibody interactions at the immunological synapse between PD-1 expressed by Effector T cells that interact with the T7 subtype of cancer cells and Anti-PD-L1 mAb delivered to the tumor by way of IV injection into the blood   |
| Tumor                | T8a=PD-1:aPD1    | mole  | Heterogeneous receptor-antibody interactions at the immunological synapse between PD-1 expressed by Effector T cells that interact with the T8 subtype of cancer cells and Anti-PD-L1 mAb delivered to the tumor by way of IV injection into the blood   |

| Compartment Location | Variable Name  | Units | Variable Definition                                                                                                                                                                                                                                     |
|----------------------|----------------|-------|---------------------------------------------------------------------------------------------------------------------------------------------------------------------------------------------------------------------------------------------------------|
| Tumor                | C9a=PD1:aPD1   | mole  | Heterogeneous receptor-antibody interactions at the immunological synapse between PD-1 expressed by the T9 subtype of cancer cells and Anti-PD-1 mAb delivered to the tumor by way of IV injection into the blood                                       |
| Tumor                | C10a=PD1:aPD1  | mole  | Heterogeneous receptor-antibody interactions at the immunological synapse between PD-1 expressed by the T10 subtype of cancer cells and Anti-PD-1 mAb delivered to the tumor by way of IV injection into the blood                                      |
| Tumor                | T10b=PD1:aPD1  | mole  | Heterogeneous receptor-antibody interactions at the immunological synapse between PD-1 expressed by Effector T cells that interact with the T10 subtype of cancer cells and Anti-PD-L1 mAb delivered to the tumor by way of IV injection into the blood |
| Tumor                | T11b=PD1:aPD1  | mole  | Heterogeneous receptor-antibody interactions at the immunological synapse between PD-1 expressed by Effector T cells that interact with the T11 subtype of cancer cells and Anti-PD-L1 mAb delivered to the tumor by way of IV injection into the blood |
| Tumor                | T13b=PD1:aPD1  | mole  | Heterogeneous receptor-antibody interactions at the immunological synapse between PD-1 expressed by Effector T cells that interact with the T13 subtype of cancer cells and Anti-PD-L1 mAb delivered to the tumor by way of IV injection into the blood |
| Tumor                | C14a=PD1:aPD1  | mole  | Heterogeneous receptor-antibody interactions at the immunological synapse between PD-1 expressed by the T14 subtype of cancer cells and Anti-PD-1 mAb delivered to the tumor by way of IV injection into the blood                                      |
| Tumor                | T14b=PD1:aPD1  | mole  | Heterogeneous receptor-antibody interactions at the immunological synapse between PD-1 expressed by Effector T cells that interact with the T14 subtype of cancer cells and Anti-PD-L1 mAb delivered to the tumor by way of IV injection into the blood |
| Tumor                | C15a=PD1:aPD1  | mole  | Heterogeneous receptor-antibody interactions at the immunological synapse between PD-1 expressed by the T15 subtype of cancer cells and Anti-PD-1 mAb delivered to the tumor by way of IV injection into the blood                                      |
| Tumor                | T15b=PD1:aPD1  | mole  | Heterogeneous receptor-antibody interactions at the immunological synapse between PD-1 expressed by Effector T cells that interact with the T15 subtype of cancer cells and Anti-PD-L1 mAb delivered to the tumor by way of IV injection into the blood |
| Tumor                | C16a=PD1:aPD1  | mole  | Heterogeneous receptor-antibody interactions at the immunological synapse between PD-1 expressed by the T16 subtype of cancer cells and Anti-PD-1 mAb delivered to the tumor by way of IV injection into the blood                                      |
| Tumor                | T16b=PD1:aPD1  | mole  | Heterogeneous receptor-antibody interactions at the immunological synapse between PD-1 expressed by Effector T cells that interact with the T16 subtype of cancer cells and Anti-PD-L1 mAb delivered to the tumor by way of IV injection into the blood |
| Tumor                | T12b=PD1:aPD1  | mole  | Heterogeneous receptor-antibody interactions at the immunological synapse between PD-1 expressed by Effector T cells that interact with the T12 subtype of cancer cells and Anti-PD-L1 mAb delivered to the tumor by way of IV injection into the blood |
| Tumor                | TregT          | cell  | Total number of T Regulatory cells that able to engage with Effector T cells and mAPCs in the tumor                                                                                                                                                     |
| Tumor                | TregT_Teff     | cell  | T Regulatory cells in the tumor that have engaged in interacting with Effector T cells                                                                                                                                                                  |
| Tumor                | MDSC_T         | cell  | Total number of MDSCs that able to engage with Effector T cells in the tumor                                                                                                                                                                            |
| Tumor                | MDSCsT_Teff    | cell  | MDSCs in the tumor that have engaged in interacting with Effector T cells                                                                                                                                                                               |
| Tumor                | MDSCsT_EngTeff | cell  | MDSCs in the tumor that have engaged in interacting with Effector T cells that are accounting for the expression of PD-1 and PD-L1                                                                                                                      |



| Compartment Location | Variable Name    | Units | Variable Definition                                                                                                                                                                                                                           |
|----------------------|------------------|-------|-----------------------------------------------------------------------------------------------------------------------------------------------------------------------------------------------------------------------------------------------|
| Tumor                | TregT_EngAPC     | cell  | T Regulatory cells in the tumor that have engaged in interacting with mAPCs that are accounting for the expression of CTLA-4                                                                                                                  |
| Tumor                | mAPCT_EngTregT   | cell  | mAPCs in the tumor that have engaged in interacting with T Regulatory cells that are accounting for the expression of CD80 and CD86                                                                                                           |
| Tumor                | Teff_EngTregT    | cell  | Effector T cells in the tumor that have engaged in interacting with T Regulatory cells that are accounting for the expression of CD80, PD-1 and PD-L1                                                                                         |
| Tumor                | PD1_TeffT        | mole  | PD-1 expressed by Effector T cells that interact with T Regulatory cells in the tumor                                                                                                                                                         |
| Tumor                | PDL1_TeffT       | mole  | PD-L1 expressed by Effector T cells that interact with T Regulatory cells in the tumor                                                                                                                                                        |
| Tumor                | CD80_TeffT       | mole  | CD80 expressed by Effector T cells that interact with T Regulatory cells in the tumor                                                                                                                                                         |
| Tumor                | CD80_mAPCT       | mole  | CD80 expressed by mAPCs that interact with T Regulatory cells in the tumor                                                                                                                                                                    |
| Tumor                | PDL1_MDSCsT      | mole  | PD-L1 expressed by MDSCs that interact with Effector T cells in the tumor                                                                                                                                                                     |
| Tumor                | PD1_MDSCsT       | mole  | PD-1 expressed by MDSCs that interact with Effector T cells in the tumor                                                                                                                                                                      |
| Tumor                | CD86_mAPCT       | mole  | CD86 expressed by mAPCs that interact with T Regulatory cells in the tumor                                                                                                                                                                    |
| Tumor                | PD1_TregT        | mole  | PD-1 expressed by T Regulatory cells that interact with Effector T cells in the tumor                                                                                                                                                         |
| Tumor                | PDL1_TregT       | mole  | PD-L1 expressed by T Regulatory cells that interact with Effector T cells in the tumor                                                                                                                                                        |
| Tumor                | CTLA4_TregT      | mole  | CTLA-4 expressed by T Regulatory cells that interact with mAPCs in the tumor                                                                                                                                                                  |
| Tumor                | CTLA4:CD80_TrAT  | mole  | Receptor-receptor interactions at the immunological synapse between CD80 expressed by mAPCs and CTLA-4 expressed on T Regulatory cells in the tumor                                                                                           |
| Tumor                | CTLA4:CD86_TrAT  | mole  | Receptor-receptor interactions at the immunological synapse between CD86 expressed by mAPCs and CTLA-4 expressed on T Regulatory cells in the tumor                                                                                           |
| Tumor                | CTLA4_CTLA4-Trt  | mole  | Heterogeneous receptor-antibody interactions at the immunological synapse between CTLA-4 expressed by T Regulatory cells that interact with the mAPCs and Anti-PD-L1 mAb delivered to the tumor by way of IV injection into the blood         |
| Tumor                | PDL1:PD1_TrTeff  | mole  | Receptor-receptor interactions at the immunological synapse between PD-1 expressed by the Effector T cells and PD-L1 expressed on T Regulatory cells in the tumor                                                                             |
| Tumor                | PDL1:CD80_TrTeff | mole  | Receptor-receptor interactions at the immunological synapse between CD80 expressed by the Effector T cells and PD-L1 expressed on T Regulatory cells in the tumor                                                                             |
| Tumor                | PD1:PDL1_TrTeff  | mole  | Receptor-receptor interactions at the immunological synapse between PD-L1 expressed by the Effector T cells and PD-1 expressed on T Regulatory cells in the tumor                                                                             |
| Tumor                | PDL1:CD80_MDSCT  | mole  | Receptor-receptor interactions at the immunological synapse between CD80 expressed by the Effector T cells and PD-L1 expressed on MDSCs in the tumor                                                                                          |
| Tumor                | PDL1:PD1_MDSCT   | mole  | Receptor-receptor interactions at the immunological synapse between PD-1 expressed by the Effector T cells and PD-L1 expressed on MDSCs cells in the tumor                                                                                    |
| Tumor                | PD1:PDL1_MDSCT   | mole  | Receptor-receptor interactions at the immunological synapse between PD-L1 expressed by the Effector T cells and PD-1 expressed on MDSCs in the tumor                                                                                          |
| Tumor                | PD1:aPD1_Teff    | mole  | Heterogeneous receptor-antibody interactions at the immunological synapse between PD-1 expressed by Effector T cells that interact with the T Regulatory cells and Anti-PD-1 mAb delivered to the tumor by way of IV injection into the blood |
| Tumor                | PDL1:aPDL1_Teff  | mole  | Heterogeneous receptor-antibody interactions at the immunological synapse between PD-L1 expressed by Effector T cells that interact with the T Regulatory cells                                                                               |

| Compartment Location | Variable Name        | Units                    | Variable Definition                                                                                                                                                                                                                         |
|----------------------|----------------------|--------------------------|---------------------------------------------------------------------------------------------------------------------------------------------------------------------------------------------------------------------------------------------|
|                      |                      |                          | and Anti-PD-L1 mAb delivered to the tumor by way of IV injection into the blood                                                                                                                                                             |
| Tumor                | PDL1:aPDL1_Treg      | mole                     | Heterogeneous receptor-antibody interactions at the immunological synapse between PD-L1 expressed by T Regulatory cells that interact with Effector T cells and Anti-PD-L1 mAb delivered to the tumor by way of IV injection into the blood |
| Tumor                | PD1:aPD1_Treg        | mole                     | Heterogeneous receptor-antibody interactions at the immunological synapse between PD-1 expressed by T Regulatory cells that interact with Effector T cells and Anti-PD-1 mAb delivered to the tumor by way of IV injection into the blood   |
| Tumor                | PD1:aPD1_MDSCs       | mole                     | Heterogeneous receptor-antibody interactions at the immunological synapse between PD-1 expressed by MDSCs that interact with Effector T cells and Anti-PD-1 mAb delivered to the tumor by way of IV injection into the blood                |
| Tumor                | PDL1:aPDL1_MDSCs     | mole                     | Heterogeneous receptor-antibody interactions at the immunological synapse between PD-L1 expressed by MDSCs that interact with Effector T cells and Anti-PD-L1 mAb delivered to the tumor by way of IV injection into the blood              |
| Tumor                | TregT_EngTeff        | cell                     | T Regulatory cells in the tumor that have engaged in interacting with Effector T cells that are accounting for the expression of PD-1 and PD-L1                                                                                             |
| Tumor                | Teff_EngMDSC         | cell                     | Effector T cells in the tumor that have engaged in interacting with MDSCs that are accounting for the expression of CD80, PD-1 and PD-L1                                                                                                    |
| Tumor                | CD80_TeffT1          | mole                     | CD80 expressed by Effector T cells that interact with MDSCs in the tumor                                                                                                                                                                    |
| Tumor                | PDL1_TeffT1          | mole                     | PD-L1 expressed by Effector T cells that interact with MDSCs in the tumor                                                                                                                                                                   |
| Tumor                | PD1_TeffT1           | mole                     | PD-1 expressed by Effector T cells that interact with MDSCs in the tumor                                                                                                                                                                    |
| Tumor                | PD1:aPD1_Teff1       | mole                     | Heterogeneous receptor-antibody interactions at the immunological synapse between PD-1 expressed by Effector T cells that interact with the MDSCs and Anti-PD-1 mAb delivered to the tumor by way of IV injection into the blood            |
| Tumor                | PDL1:aPDL1_Teff1     | mole                     | Heterogeneous receptor-antibody interactions at the immunological synapse between PD-L1 expressed by Effector T cells that interact with the MDSCs and Anti-PD-L1 mAb delivered to the tumor by way of IV injection into the blood          |
| Tumor                | Effector_TT_TregT    | cell                     | Total number of Effector T cells that able to engage with T Regulatory cells in the tumor                                                                                                                                                   |
| Tumor                | Effector_TT_MDSCs    | cell                     | Total number of Effector T cells that able to engage with MDSCs in the tumor                                                                                                                                                                |
| Tumor                | Effector_TT_Res      | cell                     | Effector T cells that have become Resident Effector Memory cells after the tumor has died                                                                                                                                                   |
| Tumor                | Effector_TT_Count    | cell                     | The total number of Effector and Resident Effector Memory cells                                                                                                                                                                             |
| Tumor                | Effector_TT_per_Treg | cell/<br>cell            | The number of Effector T cells per T Regulatory cells in the tumor                                                                                                                                                                          |
| Tumor                | Effector_TT_per_mL   | cell/<br>mm <sup>3</sup> | The volumetric density of Effector T cells per milliliter in the tumor                                                                                                                                                                      |

Table S4 – Definition of species in the model (End)

Table S5 – Model Parameters (Start)

| Variable | Value | Units         | Source | Description                                                                         |
|----------|-------|---------------|--------|-------------------------------------------------------------------------------------|
| %_NT_LN  | 55    | dimensionless | [1, 2] | Percent Naïve T cells of total T cells in each lymph node (taken as all CD3+ cells) |

| Variable                 | Value      | Units         | Source                                    | Description                                                                                                                            |
|--------------------------|------------|---------------|-------------------------------------------|----------------------------------------------------------------------------------------------------------------------------------------|
| %_Tr_LN                  | 5-35       | dimensionless | [1, 3-5]                                  | Percent Regulatory T cells of total T cells in each lymph node                                                                         |
| %{CD80}{PD1}C            | Calculated | dimensionless | Calculated; see algebraic equations below | Fraction of cancer cells expressing CD80 and PD-1 checkpoint receptors only                                                            |
| %{CD80}C                 | Calculated | dimensionless | Calculated; see algebraic equations below | Fraction of cancer cells expressing the CD80 checkpoint receptor only                                                                  |
| %{Other}C                | Calculated | dimensionless | Calculated; see algebraic equations below | Fraction of cancer cells expressing only unknown factors, other than CD80, PD-1, PD-L1 and PD-L2                                       |
| %{PD1}{80}{L1}{L2}C      | Calculated | dimensionless | Calculated; see algebraic equations below | Fraction of cancer cells expressing CD80, PD-1, PD-L1 and PD-L2 checkpoint receptors only                                              |
| %{PD1}{80}{L1}C          | Calculated | dimensionless | Calculated; see algebraic equations below | Fraction of cancer cells expressing CD80, PD-1, and PD-L1 checkpoint receptors only                                                    |
| %{PD1}{80}{PDL2}C        | Calculated | dimensionless | Calculated; see algebraic equations below | Fraction of cancer cells expressing CD80, PD-1, and PD-L2 checkpoint receptors only                                                    |
| %{PD1}{L1}{L2}C          | Calculated | dimensionless | Calculated; see algebraic equations below | Fraction of cancer cells expressing PD-1, PD-L1 and PD-L2 checkpoint receptors only                                                    |
| %{PD1}{L1}C              | Calculated | dimensionless | Calculated; see algebraic equations below | Fraction of cancer cells expressing PD-1, and PD-L1 checkpoint receptors only                                                          |
| %{PD1}{L2}C              | Calculated | dimensionless | Calculated; see algebraic equations below | Fraction of cancer cells expressing PD-1, and PD-L2 checkpoint receptors only                                                          |
| %{PD1}C                  | Calculated | dimensionless | Calculated; see algebraic equations below | Fraction of cancer cells expressing the PD-1 checkpoint receptor only                                                                  |
| %{PDL1}{80}{L2}C         | Calculated | dimensionless | Calculated; see algebraic equations below | Fraction of cancer cells expressing CD80, PD-L1, and PD-L1 checkpoint receptors only                                                   |
| %{PDL1}{80}C             | Calculated | dimensionless | Calculated; see algebraic equations below | Fraction of cancer cells expressing CD80 and PD-L1 checkpoint receptors only                                                           |
| %{PDL1}{PDL2}C           | Calculated | dimensionless | Calculated; see algebraic equations below | Fraction of cancer cells expressing PD-L1, and PD-L2 checkpoint receptors only                                                         |
| %{PDL1}C                 | Calculated | dimensionless | Calculated; see algebraic equations below | Fraction of cancer cells expressing the PD-L1 checkpoint receptor only                                                                 |
| %{PDL2}{80}C             | Calculated | dimensionless | Calculated; see algebraic equations below | Fraction of cancer cells expressing CD80 and PD-L2 checkpoint receptors only                                                           |
| %{PDL2}C                 | Calculated | dimensionless | Calculated; see algebraic equations below | Fraction of cancer cells expressing the PD-L2 checkpoint receptor only                                                                 |
| %CD80_Exp_Cancer         | 5 (mean)   | dimensionless | [6-8]                                     | Percent of cancer cells of total cancer cells that are CD80 positive that interact with the Effector T cells in the tumor compartment  |
| %CD80_receptor_level_PNT | 10         | dimensionless | Assumed low                               | Percent of maximum CD80 receptor expression on Primed Naive T cells in the lymph nodes                                                 |
| %PD1_Exp_Cancer          | 10 (mean)  | dimensionless | [9]                                       | Percent of cancer cells of total cancer cells that are PD-1 positive that interact with the Effector T cells in the tumor compartment  |
| %PD1_receptor_level_PNT  | 25         | dimensionless | [10]                                      | Percent of maximum PD-1 receptor expression on Primed Naive T cells in the lymph nodes                                                 |
| %PDL1_Exp_Cancer         | 60         | dimensionless | [11]                                      | Percent of cancer cells of total cancer cells that are PD-L1 positive that interact with the Effector T cells in the tumor compartment |
| %PDL1_receptor_level_PNT | 25         | dimensionless | Assumed low                               | Percent of maximum PD-L1 receptor expression on Primed Naive T cells in the lymph nodes                                                |
| %PDL2_Exp_Cancer         | 20 (mean)  | dimensionless | [12]                                      | Percent of cancer cells of total cancer cells that are PD-L2 positive that interact with the Effector T cells in the tumor compartment |

| Variable                 | Value                                                | Units           | Source                                                             | Description                                                                                                                                                                                                                               |
|--------------------------|------------------------------------------------------|-----------------|--------------------------------------------------------------------|-------------------------------------------------------------------------------------------------------------------------------------------------------------------------------------------------------------------------------------------|
| %Sig_Inhibit_Cancer      | 0.65                                                 | dimensionless   | Set to fit response                                                | The percent effect that total immune checkpoints on the cancer cells have on inactivating the Effector T cells in the tumor                                                                                                               |
| %T_Tregs_per_Cancer      | 0-0.25                                               | dimensionless   | Assumed                                                            | Defines the percentage of Regulatory T cells in the tumor compartment as a percent of total tumor cells                                                                                                                                   |
| Adhesion_D_Lung_Liv_spln | 1E9                                                  | cell/ml         | [13]                                                               | Effector T cell adhesion density in Lung, Liver, or Spleen vasculature                                                                                                                                                                    |
| Adhesion_Density_Tmr     | 5E8                                                  | cell/ml         | [13]                                                               | Effector T cell adhesion density in Tumor vasculature                                                                                                                                                                                     |
| AntSpread                | x = 1 to 5<br>(Where it is used as 10 <sup>x</sup> ) | dimensionless   | Estimated during fitting to anti-PD-1 data and varied across range | Sets the number of TAA/TSA released per cancer cell upon natural death and decay or following cytotoxic killing. The value is used to set a multiple of cancer cells in the formation of debris for APC maturation.                       |
| Antigen_Intensity        | Assigned from 0.8-1.0 for melanoma                   | dimensionless   | Upper range of cancer types [14]                                   | The strength of the tumor antigens that are involved in priming of the T cells in the lymph nodes                                                                                                                                         |
| AR_Liver                 | 1.5                                                  | 1/minute        | [13]                                                               | Effector T cell arrest rate in Liver vasculature                                                                                                                                                                                          |
| AR_Lungs                 | 0.0027                                               | 1/minute        | [13]                                                               | Effector T cell arrest rate in Lungs vasculature                                                                                                                                                                                          |
| AR_Spleen                | 0.0036                                               | 1/minute        | [13]                                                               | Effector T cell arrest rate in Spleen vasculature                                                                                                                                                                                         |
| AR_Tmr                   | 1                                                    | 1/minute        | [13]                                                               | Effector T cell arrest rate in Tumor vasculature                                                                                                                                                                                          |
| Avogadro's_Num           | 6.022E+23                                            | molecules /mole | Exact value                                                        | Avogadro's number – converts receptor numbers to moles                                                                                                                                                                                    |
| BodyWeight (kg)          | 80                                                   | kg              | [15]                                                               | Body weight of an average human being                                                                                                                                                                                                     |
| Cancer_Cell_Diam_um      | 12                                                   | μm              | [16, 17]                                                           | Diameter of each cancer cell when considering each cell's volume to be represented by a sphere                                                                                                                                            |
| Cancer_Cell_Vol_mm3      | 9.0478E-7                                            | mm <sup>3</sup> | Calculated; see algebraic equations below                          | Volume of each cancer cell when the diameter is that of a sphere                                                                                                                                                                          |
| Cancer_Diam_mm           | Calculated                                           | mm              | Calculated; see algebraic equations below                          | Diameter of the entire tumor – considering all cells and a void fraction                                                                                                                                                                  |
| Cancer_mm_Start_Therapy  | Assigned                                             | mm              | Assigned                                                           | Diameter of the tumor when to start the therapeutic regimen                                                                                                                                                                               |
| Cancer_per_T_Cell_Int    | Set to 1                                             | cell/cell       | Variable                                                           | Number of cancer cells that interact with each Effector T cell in the model                                                                                                                                                               |
| Cancer_per_T_Cell_max    | 4                                                    | cell/cell       | [18, 19]                                                           | Maximum number of cancer cells that can interact with each Effector T cell in the model; assuming that each Effector T cell uses 25% of its surface area to interact with each cancer cell (can be up to 50%) [19].                       |
| Cancer_Vol_cm3           | Calculated                                           | cm <sup>3</sup> | Calculated; see algebraic equations below                          | Volume of the entire tumor – considering all cells and a void fraction                                                                                                                                                                    |
| CancerTEng               | 2.079                                                | 1/hour          | [20]                                                               | Rate constant defining the half-life of engagement between cancer cells and Effector T cells in the tumor (at a migration rate of 5-10 μm/min, T cells encounter and engage with a cancer cell approximately every 15 minutes to 1 hour). |
| CancerTInt               | 0.03465                                              | 1/minute        | [20]                                                               | Rate constant defining the half-life of dissociation between Effector T cells and cancer cells (thus, determining total time of interaction)                                                                                              |
| CD28_POS-Sig_NT          | Calculated                                           | dimensionless   | Calculated with RO; see algebraic equations below                  | Fraction of total CD28 receptors on Naïve T cells that are involved in interacting with the CD80 and CD86 receptors on mAPCs during priming in the lymph nodes                                                                            |
| CD28_POS-to-Total        | Calculated                                           | dimensionless   | Calculated with RO; see algebraic equations below                  | Fraction of total CD28 receptors on Primed Naïve T cells that are involved in interacting with the CD80 and CD86 receptors on mAPCs during priming in the lymph nodes                                                                     |
| CD28_receptors-per-Tcell | 15000                                                | molecules/cell  | [21]                                                               | Number of CD28 receptors expressed on each T cell during priming                                                                                                                                                                          |
| CD80_PNT_NEG-to-Max      | Calculated                                           | dimensionless   | Calculated with RO; see algebraic equations below                  | Fraction of total CD80 receptors on Primed Naïve T cells that are involved in interacting with the PD-L1 receptors on mAPCs during priming in the lymph nodes                                                                             |

| Variable                 | Value                                     | Units          | Source                                                                     | Description                                                                                                                                                                |
|--------------------------|-------------------------------------------|----------------|----------------------------------------------------------------------------|----------------------------------------------------------------------------------------------------------------------------------------------------------------------------|
| CD80_receptors_per_C_Cl  | 30000                                     | molecules/cell | Assumed same as T cells                                                    | Number of CD80 receptors expressed on each cancer cell (assumed same as for T cells).                                                                                      |
| CD80_receptors-per-mAPC  | 130000                                    | molecules/cell | [22]                                                                       | Maximum number of CD80 receptors expressed on each mAPC                                                                                                                    |
| CD80_receptors-per-Tcell | 30000                                     | molecules/cell | [23, 24]                                                                   | Number of CD80 receptors expressed on each T cell (by acquisition of CD80 from mAPCs over two rounds of priming) [24].                                                     |
| CD80Sig_Tr-PNT           | Calculated                                | dimensionless  | Calculated with RO; see algebraic equations below                          | Fraction of total CD80 receptors on Primed Naive T cells that are involved in interacting with the PD-L1 receptors on Regulatory T cells during priming in the lymph nodes |
| CD86_receptors-per-mAPC  | 208000                                    | molecules/cell | [22]                                                                       | Maximum number of CD86 receptors expressed on each mAPC                                                                                                                    |
| Chemokine                | 100                                       | dimensionless  | Estimated during anti-PD-1 therapy fitting; varied in sensitivity analysis | The chemokine factor to promote extravasation of effector T cells into the tumor                                                                                           |
| Cl_CTLA4                 | 0.00373614                                | 1/hour         | [15]                                                                       | Clearance rate of Anti-CTLA-4 mAb from the central compartment                                                                                                             |
| Cl_PD1                   | 0.01457072                                | liter/hour     | [25]                                                                       | Clearance rate of Anti-PD-1 mAb from the central compartment                                                                                                               |
| Cl_PDL1                  | 0.01653012                                | liter/hour     | [26, 27]                                                                   | Clearance rate of Anti-PD-L1 mAb from the central compartment                                                                                                              |
| Copies-per-T_Cell_Clone  | 10-130                                    | dimensionless  | [28-30]                                                                    | Number of copies of each Naïve T cell clone in the lymph nodes.                                                                                                            |
| CTLA4_change_schedule    | Based on regimen                          | day            | [15] Based on regimen                                                      | Time in simulation to switch schedule in regimen for Anti-CTLA-4 therapy                                                                                                   |
| CTLA4_counter_off        | Based on regimen                          | day            | [15] Based on regimen                                                      | Time in simulation to stop Anti-CTLA-4 dose                                                                                                                                |
| CTLA4_counter_on         | Based on regimen                          | day            | [15] Based on regimen                                                      | Time in simulation to start Anti-CTLA-4 dose                                                                                                                               |
| CTLA4_DoseSet            | Based on regimen                          | mg/kg          | Set dose                                                                   | Dose of anti-CTLA-4 therapy                                                                                                                                                |
| CTLA4_NEG-to-Total       | Calculated; see algebraic equations below | dimensionless  | Calculated with RO; see algebraic equations below                          | Fraction of total CTLA-4 receptors on Primed Naive T cells that are involved in interacting with the CD80 and CD86 receptors on mAPCs during priming in the lymph nodes    |
| CTLA4_receptors-Int-PNT  | Calculated; see algebraic equations below | molecules/cell | [31]                                                                       | Maximum number of CTLA-4 receptors that can be recruited to the immunological synapse by Primed Naive T cells when interacting with mAPCs                                  |
| CTLA4_receptors-nInt-PNT | Calculated; see algebraic equations below | molecules/cell | [32]                                                                       | Number of CTLA-4 receptors that are expressed on the surface of non-interacting Primed Naive T cells                                                                       |
| CTLA4_receptors-Tr       | Calculated; see algebraic equations below | molecules/cell | Assumed dependent on CD28/CTLA4 ratio                                      | Maximum number of CTLA-4 receptors on T-regulatory cells                                                                                                                   |
| CTLA4mAb                 | Based on regimen                          | mg/kg          | [15] Based on regimen                                                      | Dose of Anti-CTLA-4 being delivered                                                                                                                                        |
| CTLA4mAb_Dose            | Based on regimen                          | mg/kg          | [15] Based on regimen                                                      | Dose of Anti-CTLA-4 to deliver based on the current schedule                                                                                                               |
| CTLA4mAb_New_Dose        | Based on regimen                          | mg/kg          | [15] Based on regimen                                                      | Dose of Anti-CTLA-4 to be delivered when schedule is changed                                                                                                               |
| CTLA4Sig_TrLN            | Calculated                                | dimensionless  | Calculated with RO; see algebraic equations below                          | Fraction of CTLA-4 receptors expressed on T Regulatory cells that are occupied by Anti-CTLA-4 mAb in the lymph nodes                                                       |
| CTLA4Sig_TrLN-mAPC       | Calculated                                | dimensionless  | Calculated with RO; see algebraic equations below                          | Fraction of CTLA-4 receptors expressed on T Regulatory cells that are interacting with CD80 and CD86 on the mAPCs in the lymph nodes                                       |
| CTLA4-to-CD28_Ratio_Int  | Calculated                                | dimensionless  | [31]                                                                       | Ratio of CTLA-4 to CD28 expression on interacting Primed Naive T cells                                                                                                     |
| CTLA4-to-CD28_Ratio_nInt | 0.035                                     | dimensionless  | [32]                                                                       | Ratio of CTLA-4 to CD28 expression on non-interacting Primed Naive T cells                                                                                                 |

| Variable                 | Value            | Units         | Source                                 | Description                                                                                                                                                                                       |
|--------------------------|------------------|---------------|----------------------------------------|---------------------------------------------------------------------------------------------------------------------------------------------------------------------------------------------------|
| CTLA4-to-CD28_Ratio_Tr   | 0.5              | dimensionless | [33]                                   | CTLA-4 expression levels on T Regulatory cells relative to CD28 expression on Primed Naive T cells                                                                                                |
| day                      | 1                | day           | Unit assignment                        | Assigns value of 1 day to the term day in the model                                                                                                                                               |
| Debris_Decay             | 2                | 1/day         | [34, 35]                               | Half-life of tumor debris and non-phagocytosed tumor antigens                                                                                                                                     |
| Debris_Transport         | 3                | 1/day         | [34]                                   | Transport rate of tumor debris by the lymphatics to the lymph nodes (based on "permeation of tumor debris and the blood")                                                                         |
| Delta_Liver              | 1                | dimensionless | [13]                                   | Fraction of Effector T cells in extravascular space of Liver that can recirculate                                                                                                                 |
| Delta_LN                 | 0.018            | dimensionless | [13]                                   | Fraction of Effector T cells in extravascular space of Lymph Nodes that can recirculate                                                                                                           |
| Delta_Lungs              | 1                | dimensionless | [13]                                   | Fraction of Effector T cells in extravascular space of Lungs that can recirculate                                                                                                                 |
| Delta_Spleen             | 1                | dimensionless | [13]                                   | Fraction of Effector T cells in extravascular space of Spleen that can recirculate                                                                                                                |
| Dose_sched_CTLA4         | Based on regimen | day           | [15]<br>Based on regimen               | Time between sequential doses of Anti-CTLA-4 in a regimen                                                                                                                                         |
| Dose_sched_PD1           | Based on regimen | day           | [25]<br>Based on regimen               | Time between sequential doses of Anti-PD-1 in a regimen                                                                                                                                           |
| Dose_sched_PDL1          | Based on regimen | day           | [26, 27]<br>Based on regimen           | Time between sequential doses of Anti-PD-L1 in a regimen                                                                                                                                          |
| Durvalumab_MW            | 146300000        | mg/mole       | [36-39]                                | Molecular weight of Anti-PD-L1 antibody, Durvalumab                                                                                                                                               |
| E_Lungs                  | 0.0019           | 1/minute      | [13]                                   | Effector T cell depletion rate                                                                                                                                                                    |
| EffT_InOutLN             | 0.0693           | 1/hour        | [40]                                   | Rate constant defining the half-life of Naïve T cell migration into and out of the lymph nodes                                                                                                    |
| EffT_Migrate             | 0.9              | 1/day         | [34, 41]                               | Rate constant defining the half-life of Effector T cell migration from the lymph nodes to the blood                                                                                               |
| EffT_Res_Conversion      | 0.1155           | 1/minute      | [42, 43]                               | Rate constant defining the half-life by which Effector T cells in the tumor compartment undergo apoptosis (90%) and become resident Effector T cells (10%) following the death of the tumor [42]. |
| EffT_Turnover            | 0.02             | 1/day         | [34, 35, 44, 45]                       | Rate constant defining the half-life of Effector T cells                                                                                                                                          |
| Endo_CTLA4               | 0.3465           | 1/minute      | [46, 47]                               | Rate constant defining the half-life of (trans)endocytosis of CTLA-4 on T cells                                                                                                                   |
| EndTherapy               | 1                | dimensionless | Assigned when to stop therapy          | Parameter used to define when to stop therapy after tumor becomes smaller than a certain size                                                                                                     |
| Exp_All_mAPCLN           | 69.3             | 1/second      | Assumed to be very fast                | Rate constant defining the half-life of expression of receptors on mAPCs that are part of the mAPC count                                                                                          |
| Exp_CD28/80/86/PD1/L1/L2 | 2.772            | 1/minute      | [31, 48]                               | Rate constant defining the half-life of expression of CD28, CD80, CD86, PD-1, PD-L1 and PD-L2 to the immunological synapse by all interacting T cells, mAPCs and cancer cells                     |
| Exp_CTLA4                | 0.0462           | 1/minute      | [49]                                   | Rate constant defining the half-life of expression of CTLA-4 to the immunological synapse by all interacting T cells                                                                              |
| f_LN_CTLA4               | 0.2              | dimensionless | [50]                                   | Assume that due to high cell numbers and packing, that the LN only allows for 3% interstitial space for antibody transport.                                                                       |
| f_LN_PD1                 | 0.1              | dimensionless | [50]                                   | Assume that due to high cell numbers and packing, that the LN only allows for 3% interstitial space for antibody transport.                                                                       |
| Frac_CD80_Exp_Cancer     | Set value        | dimensionless | Varied parameter                       | Fraction form of %CD80_Exp_Cancer                                                                                                                                                                 |
| Frac_PD1_Exp_Cancer      | Set value        | dimensionless | Varied parameter                       | Fraction form of %PD1_Exp_Cancer                                                                                                                                                                  |
| Frac_PDL1_Exp_Cancer     | Set value        | dimensionless | Varied parameter                       | Fraction form of %PDL1_Exp_Cancer                                                                                                                                                                 |
| Frac_PDL2_Exp_Cancer     | Set value        | dimensionless | Varied parameter                       | Fraction form of %PDL2_Exp_Cancer                                                                                                                                                                 |
| Frac_Vv_Tmr              | 0.07             | dimensionless | [13]                                   | Fraction of vascular of total Tumor                                                                                                                                                               |
| gamma_Sig                | 3                | dimensionless | Set for RO-based dose response potency | Gamma for total CTLA4 signaling in Tumor                                                                                                                                                          |
| gamma_Sig1               | 7                | dimensionless | Set for RO-based dose response potency | Gamma for total CD80/PD1/PDL1 total signaling in Tumor                                                                                                                                            |

| Variable              | Value     | Units          | Source                                                                               | Description                                                                                                                                                                                                                                                                                                                                                |
|-----------------------|-----------|----------------|--------------------------------------------------------------------------------------|------------------------------------------------------------------------------------------------------------------------------------------------------------------------------------------------------------------------------------------------------------------------------------------------------------------------------------------------------------|
| gamma_SigTr           | 3         | dimensionless  | Set for RO-based dose response potency                                               | Gamma for total CD80/PD1/PDL1 total signaling in Lymph Node                                                                                                                                                                                                                                                                                                |
| gamma_TC_Assoc        | 0.9       | dimensionless  | [51]                                                                                 | Potency of Effector engagement/killing between Effector and target cells                                                                                                                                                                                                                                                                                   |
| Ipilimumab_MW         | 148634914 | mg/mole        | [52, 53]                                                                             | Molecular weight of Anti-CTLA-4 antibody, Ipilimumab                                                                                                                                                                                                                                                                                                       |
| IS_Scaling            | 2         | dimensionless  | [54, 55]                                                                             | Sets the immunological synapse diameter to 30nm, from 15nm.                                                                                                                                                                                                                                                                                                |
| ISF                   | 15.9      | liter          | [56]                                                                                 | Volume of interstitial fluid (ISF) in tissues                                                                                                                                                                                                                                                                                                              |
| J_Liver               | 0.0029    | 1/minute       | [13]                                                                                 | Effector T cell transmigration rate in Liver                                                                                                                                                                                                                                                                                                               |
| J_Lungs               | 0.0029    | 1/minute       | [13]                                                                                 | Effector T cell transmigration rate in Lungs                                                                                                                                                                                                                                                                                                               |
| J_Spleen              | 0.0029    | 1/minute       | [13]                                                                                 | Effector T cell transmigration rate in Spleen                                                                                                                                                                                                                                                                                                              |
| J_Tmr                 | 0.0029    | 1/minute       | [13]                                                                                 | Effector T cell transmigration rate in Tumor                                                                                                                                                                                                                                                                                                               |
| k_DoseAdmin_AntiCTLA4 | 0.6666666 | 1/hour         | [15]                                                                                 | Zero-order rate constant for the delivery of Anti-CTLA-4 into the central compartment for a designated dose                                                                                                                                                                                                                                                |
| k_DoseAdmin_AntiPDL1  | 1         | 1/hour         | [26, 27]                                                                             | Zero-order rate constant for the delivery of Anti-PD-L1 into the central compartment for a designated dose                                                                                                                                                                                                                                                 |
| k_DoseAdmin_AntiPD1   | 1         | 1/hour         | [25]                                                                                 | Zero-order rate constant for the delivery of Anti-PD-1 into the central compartment for a designated dose                                                                                                                                                                                                                                                  |
| kf_APC_turnover       | 0.462     | 1/day          | [57]                                                                                 | Half-life of mAPC turnover in the lymph nodes                                                                                                                                                                                                                                                                                                              |
| kf_CanDecay           | 0.001     | 1/day          | [34, 35]                                                                             | Rate constant defining the half-life decay of cancer cells by natural death                                                                                                                                                                                                                                                                                |
| kf_Liver              | 7.6E-9    | ml/cell/minute | [13]                                                                                 | Attachment rate for free Effector T cells in Liver vasculature                                                                                                                                                                                                                                                                                             |
| kf_Lungs              | 0.0000031 | ml/cell/minute | [13]                                                                                 | Attachment rate for free Effector T cells in Lung vasculature                                                                                                                                                                                                                                                                                              |
| kf_Monocytes_intoT    | 0.0231    | 1/minute       | [58]                                                                                 | Rate constant defining the half-life of the appearance of monocytes in the tumor following the appearance of tumor antigens                                                                                                                                                                                                                                |
| kf_no_prolif          | 99.72     | 1/day          | Estimated in proportion to cells dividing 3 times a day for about 1 week as baseline | Rate constant defining the half-life for the fraction of Primed Naive T cells that will not successfully undergo the second phase of priming, and will therefore be considered anergic                                                                                                                                                                     |
| kf_Phase2P            | 0.1155    | 1/hour         | [59-61]                                                                              | Rate constant defining the approximate half-life of the entire second phase of priming in the lymph nodes, considering that the Primed Naive T cells are in the deep T-cell areas in the lymph node. This, along with the second priming phase, accounts for T cells starting to proliferate 1.5-2 days following the encounter of antigens on mAPCs [61]. |
| kf_Prolif_end         | 15000     | 1/day          | [19, 60, 62]                                                                         | Rate constant defining the half-life for conversion of proliferating Naive T cells into Effector T cells in the lymph nodes. The T cells were optimized to account for 3 divisions per day over 5 days.                                                                                                                                                    |
| kf_RestingMacrophage  | 0.01      | 1/day          | [34, 41]                                                                             | Rate constant defining the half-life for turnover of resting macrophages                                                                                                                                                                                                                                                                                   |
| kf_Spleen             | 0.0000081 | ml/cell/minute | [13]                                                                                 | Attachment rate for free Effector T cells in Spleen vasculature                                                                                                                                                                                                                                                                                            |
| kf_Tmr                | 6.9E-9    | ml/cell/minute | [13]                                                                                 | Attachment rate for free Effector T cells in Tumor vasculature                                                                                                                                                                                                                                                                                             |
| kf_TRecover           | 0.1386    | 1/minute       | Estimated                                                                            | Rate constant defining the half-life of Effector T cell recovery following their interaction with cancer cells in the tumor                                                                                                                                                                                                                                |
| kg                    | 1         | kilogram       | Unit assignment                                                                      | Assigns value of 1 kilogram to the term kg in the model                                                                                                                                                                                                                                                                                                    |
| Km                    | 0.344     | µg/ml          | [63]                                                                                 | EC50 Durvalumab saturation for ADA                                                                                                                                                                                                                                                                                                                         |
| koff_CD28_CD80        | 1.6       | 1/second       | [64]                                                                                 | Dissociation rate constant for the interaction of CD28 with CD80                                                                                                                                                                                                                                                                                           |
| koff_CD28_CD86        | 28        | 1/second       | [64]                                                                                 | Dissociation rate constant for the interaction of CD28 with CD86                                                                                                                                                                                                                                                                                           |
| koff_CTLA4_CD80       | 0.43      | 1/second       | [64]                                                                                 | Dissociation rate constant for the interaction of CTLA-4 with CD80                                                                                                                                                                                                                                                                                         |

| Variable              | Value             | Units               | Source                                                                     | Description                                                                                                                                                                                        |
|-----------------------|-------------------|---------------------|----------------------------------------------------------------------------|----------------------------------------------------------------------------------------------------------------------------------------------------------------------------------------------------|
| koff_CTLA4_CD86       | 5.1               | 1/second            | [64]                                                                       | Dissociation rate constant for the interaction of CTLA-4 with CD86                                                                                                                                 |
| koff_CTLA4mAb_CTLA4   | 0.3               | 1/second            | [65]                                                                       | Dissociation rate constant for the interaction of CTLA-4 with Anti-CTLA-4 (considering a Kd of 5.25+/-3.62 nM)                                                                                     |
| koff_PD1_PDL1         | 1.44              | 1/second            | [66]                                                                       | Dissociation rate constant for the interaction of PD-1 with PD-L1                                                                                                                                  |
| koff_PD1_PDL2         | 0.55              | 1/second            | [66]                                                                       | Dissociation rate constant for the interaction of PD-1 with PD-L2                                                                                                                                  |
| koff_PD1-PD1mAb       | 0.000768          | 1/second            | [67]                                                                       | Dissociation rate constant for the interaction of PD-1 with Anti-PD-1                                                                                                                              |
| koff_PDL1_CD80        | 5.94              | 1/second            | [66]                                                                       | Dissociation rate constant for the interaction of PD-L1 with CD80                                                                                                                                  |
| koff_PDL1-PDL1mAb     | 0.000025          | 1/second            | [26]                                                                       | Dissociation rate constant for the interaction of PD-L1 with Anti-PD-L1 (considering a Kd of 100 pM)                                                                                               |
| kon_CD28_CD80         | 660000            | 1/(molarity*second) | [64]                                                                       | Association rate constant for the interaction of CD28 with CD80                                                                                                                                    |
| kon_CD28_CD86         | 1400000           | 1/(molarity*second) | [64]                                                                       | Association rate constant for the interaction of CD28 with CD86                                                                                                                                    |
| kon_CTLA4_CD80        | 2150000           | 1/(molarity*second) | [64]                                                                       | Association rate constant for the interaction of CTLA-4 with CD80                                                                                                                                  |
| kon_CTLA4_CD86        | 1960000           | 1/(molarity*second) | [64]                                                                       | Association rate constant for the interaction of CTLA-4 with CD86                                                                                                                                  |
| kon_CTLA4mAb_CTLA4    | 40900000          | 1/(molarity*second) | [65]                                                                       | Association rate constant for the interaction of CTLA-4 with Anti-CTLA-4 (considering a Kd of 5.25+/-3.62 nM)                                                                                      |
| kon_PD1_PDL1          | 184000            | 1/(molarity*second) | [66]                                                                       | Association rate constant for the interaction of PD-1 with PD-L1                                                                                                                                   |
| kon_PD1_PDL2          | 250000            | 1/(molarity*second) | [66]                                                                       | Association rate constant for the interaction of PD-1 with PD-L2                                                                                                                                   |
| kon_PD1-PD1mAb        | 250000            | 1/(molarity*second) | [67]                                                                       | Association rate constant for the interaction of PD-1 with Anti-PD-1                                                                                                                               |
| kon_PDL1_CD80         | 316000            | 1/(molarity*second) | [66]                                                                       | Association rate constant for the interaction of PD-L1 with CD80                                                                                                                                   |
| kon_PDL1-PDL1mAb      | 250000            | 1/(molarity*second) | [26]                                                                       | Association rate constant for the interaction of PD-L1 with Anti-PD-L1 (considering a Kd of 100 pM)                                                                                                |
| KP_CTLA4              | 0.8               | dimensionless       | [56]                                                                       | Available fraction of ISF for antibody distribution                                                                                                                                                |
| KP_PD1                | 0.4               | dimensionless       | [56]                                                                       | Available fraction of ISF for antibody distribution                                                                                                                                                |
| KP_PDL1               | 0.4               | dimensionless       | [56]                                                                       | Available fraction of ISF for antibody distribution                                                                                                                                                |
| Kpa_LNB               | 9.87E-8           | cm/second           | [68]                                                                       | Transport of antibody between Serum and Lymph Node                                                                                                                                                 |
| Kpa_TB                | 9.86E-8           | cm/second           | [68]                                                                       | Transport of antibody between Serum and Tumor                                                                                                                                                      |
| kr_Lungs              | 2.3               | 1/second            | [13]                                                                       | Detachment rate of Effector T cells in the Lung vasculature                                                                                                                                        |
| kr_Periph             | 3.3               | 1/second            | [13]                                                                       | Detachment rate of Effector T cells in the Peripheral vasculature                                                                                                                                  |
| kr_Tmr                | 3.3               | 1/second            | [13]                                                                       | Detachment rate of Effector T cells in the Tumor vasculature                                                                                                                                       |
| L                     | 1                 | liter               | Unit assignment                                                            | Assigns value of 1 liter to the term L in the model                                                                                                                                                |
| LC_GI                 | 0.3               | ml/minute           | [13]                                                                       | Lymph flow rate of GI                                                                                                                                                                              |
| LC_Liver              | 0.087             | ml/minute           | [13]                                                                       | Lymph flow rate of Liver                                                                                                                                                                           |
| LC_LN                 | 0.77              | ml/minute           | [13]                                                                       | Lymph flow rate of Lymph Node                                                                                                                                                                      |
| LC_Lungs              | 0.043             | ml/minute           | [13]                                                                       | Lymph flow rate of Lungs                                                                                                                                                                           |
| LC_Periph             | 0.369             | ml/minute           | [13]                                                                       | Lymph flow rate of Peripheral tissues                                                                                                                                                              |
| LC_Spleen             | 0.00087           | ml/minute           | [13]                                                                       | Lymph flow rate of Spleen                                                                                                                                                                          |
| LC_Tmr                | 0.03              | ml/minute           | [13]                                                                       | Lymph flow rate of Tumor                                                                                                                                                                           |
| mAPC_activation_level | 1 (unless varied) | dimensionless       | [13]                                                                       | The fraction of CD80 and CD86 expression on the mAPCs from 0-1.                                                                                                                                    |
| mAPC_Debis_T_Inact    | 0.05-0.95         | dimensionless       | Varied across range (5-95%) and estimated during fitting to anti-PD-1 data | The fraction of tumor debris that is considered to not be transported to the lymph nodes, and is removed from the system                                                                           |
| mAPC_Migrate          | 0.2               | 1/day               | [34, 41, 69]                                                               | Maximum migration rate of mAPCs                                                                                                                                                                    |
| mAPC_per_T_cell       | 10                | cell/cell           | [19, 70-72]                                                                | Maximum number of mAPCs that can interact with each Naive and Primed Naive T cell. Note: all T cells were estimated to be the same size, and a surface area analysis was used for this estimation. |



| Variable                | Value            | Units              | Source                                            | Description                                                                                                                                                                            |
|-------------------------|------------------|--------------------|---------------------------------------------------|----------------------------------------------------------------------------------------------------------------------------------------------------------------------------------------|
| mAPC_per_Tr_cell        | 10               | cell/cell          | [19, 70-72]                                       | Maximum number of mAPCs that can interact with each Effector T cell. Note: all T cells were estimated to be the same size, and a surface area analysis was used for this estimation.   |
| mAPC50_per_T_cell       | 3                | cell/cell          | [40]                                              | Number of mAPCs that should interact with each Naive and Primed Naive T cell to achieve a 50% priming rate                                                                             |
| MDSCs_per_Treg          | 3                | cell/cell          | [73]                                              | The ratio of MDSCs per T Regulatory cells in the tumor                                                                                                                                 |
| mg                      | 1                | milligram          | Unit assignment                                   | Assigns value of 1 milligram to the term mg in the model                                                                                                                               |
| mole                    | 1                | mole               | Unit assignment                                   | Assigns value of 1 mole to the term mole in the model                                                                                                                                  |
| New_sched_CTLA4         | Based on regimen | day                | [15]<br>Based on regimen                          | New time between sequential doses of Anti-CTLA-4 in a regimen                                                                                                                          |
| New_sched_PD1           | Based on regimen | day                | [25]<br>Based on regimen                          | New time between sequential doses of Anti-PD-1 in a regimen                                                                                                                            |
| New_sched_PDL1          | Based on regimen | day                | [26, 27]<br>Based on regimen                      | New time between sequential doses of Anti-PD-L1 in a regimen                                                                                                                           |
| Nivolumab_MW            | 143600000        | mg/mole            | [36-38, 74]                                       | Molecular weight of Anti-PD-1 antibody, Nivolumab                                                                                                                                      |
| Num_TDLN_Considered     | 35               | dimensionless      | [75-78]<br>Estimated                              | The number of total different lymph nodes (or lobules receiving a variety of antigens) in a region near the tumor (can be >9cm) that can produce an immune response against the tumor. |
| PD1_change_schedule     | Based on regimen | day                | [25]<br>Based on regimen                          | Time in simulation to switch schedule in regimen for Anti-PD-1 therapy                                                                                                                 |
| PD1_counter_off         | Based on regimen | day                | [25]<br>Based on regimen                          | Time in simulation to stop Anti-PD-1 dose                                                                                                                                              |
| PD1_counter_on          | Based on regimen | day                | [25]<br>Based on regimen                          | Time in simulation to start Anti-PD-1 dose                                                                                                                                             |
| PD1_DoseSet             | 0-10             | mg/kg              | Based on regimen                                  | Dose administered of anti-PD-1 therapy                                                                                                                                                 |
| PD1_PNT_NEG-to-Max      | Calculated       | dimensionless      | Calculated with RO; see algebraic equations below | Fraction of total PD-1 receptors on Primed Naïve T cells that are involved in interacting with the PD-L1 and PD-L2 receptors on mAPCs during priming in the lymph nodes                |
| PD1_receptors_per_C_Cl  | 9288             | molecules/cell     | Assumed same as on T cells                        | Number of PD-1 receptors expressed on each cancer cell                                                                                                                                 |
| PD1_receptors-per-mAPC  | 9288             | molecules/cell     | Assumed same as on T cells                        | Maximum number of PD-1 receptors expressed on each mAPC (maximum taken as max from mAPC levels)                                                                                        |
| PD1_receptors-per-Tcell | 3096             | molecules/cell     | [66]                                              | Maximum number of PD-1 receptors expressed on each T cell                                                                                                                              |
| PD1mAb                  | Based on regimen | milligram/kilogram | [25]<br>Based on regimen                          | Dose of Anti-PD-1 being delivered                                                                                                                                                      |
| PD1mAb_Dose             | Based on regimen | milligram/kilogram | [25]<br>Based on regimen                          | Dose of Anti-PD-1 to deliver based on the current schedule                                                                                                                             |
| PD1mAb_New_Dose         | Based on regimen | milligram/kilogram | [25]<br>Based on regimen                          | Dose of Anti-PD-1 to be delivered when schedule is changed                                                                                                                             |
| PD1Sig_Tr-PNT           | Calculated       | dimensionless      | Calculated with RO; see algebraic equations below | Fraction of total PD-1 receptors on Primed Naïve T cells that are involved in interacting with the PD-L1 receptors on Regulatory T cells during priming in the lymph nodes             |
| PDL1_change_schedule    | Based on regimen | day                | [26, 27]<br>Based on regimen                      | Time in simulation to switch schedule in regimen for Anti-PD-L1 therapy                                                                                                                |
| PDL1_counter_off        | Based on regimen | day                | [26, 27]<br>Based on regimen                      | Time in simulation to stop Anti-PD-L1 dose                                                                                                                                             |
| PDL1_counter_on         | Based on regimen | day                | [26, 27]<br>Based on regimen                      | Time in simulation to start Anti-PD-L1 dose                                                                                                                                            |
| PDL1_DoseSet            | 0-20             | mg/kg              | Based on regimen                                  | Dose administered of anti-PD-L1 therapy                                                                                                                                                |
| PDL1_PNT_NEG-to-Max     | Calculated       | dimensionless      | Calculated with RO; see algebraic equations below | Fraction of total PD-L1 receptors on Primed Naïve T cells that are involved in interacting with the PD-1 and CD80 receptors on mAPCs during priming in the lymph nodes                 |
| PDL1_receptors_per_C_Cl | 80372            | molecules/cell     | [66]                                              | Number of PD-L1 receptors expressed on each cancer cell (maximum taken as max from mAPC levels)                                                                                        |
| PDL1_receptors-per-mAPC | 80372            | molecules/cell     | [66]                                              | Maximum number of PD-L1 receptors expressed on each mAPC                                                                                                                               |

| Variable                        | Value                               | Units              | Source                                    | Description                                                                                                                                                                                                                                                                                                                                                                         |
|---------------------------------|-------------------------------------|--------------------|-------------------------------------------|-------------------------------------------------------------------------------------------------------------------------------------------------------------------------------------------------------------------------------------------------------------------------------------------------------------------------------------------------------------------------------------|
| <b>PDL1_receptors-per-Tcell</b> | 9282                                | molecules/cell     | [66]                                      | Maximum number of PD-L1 receptors expressed on each T cell                                                                                                                                                                                                                                                                                                                          |
| <b>PDL1mAb</b>                  | Based on regimen                    | milligram/kilogram | [26, 27]<br>Based on regimen              | Dose of Anti-PD-L1 being delivered                                                                                                                                                                                                                                                                                                                                                  |
| <b>PDL1mAb_Dose</b>             | Based on regimen                    | milligram/kilogram | [26, 27]<br>Based on regimen              | Dose of Anti-PD-L1 to deliver based on the current schedule                                                                                                                                                                                                                                                                                                                         |
| <b>PDL1mAb_New_Dose</b>         | Based on regimen                    | milligram/kilogram | [26, 27]<br>Based on regimen              | Dose of Anti-PD-L1 to be delivered when schedule is changed                                                                                                                                                                                                                                                                                                                         |
| <b>PDL1Sig_Tr-PNT</b>           | Calculated                          | dimensionless      | Calculated; see algebraic equations below | Fraction of total PD-L1 receptors on Primed Naïve T cells that are involved in interacting with the PD-1 receptors on Regulatory T cells during priming in the lymph nodes                                                                                                                                                                                                          |
| <b>PDL2_receptors_per_C_CI</b>  | 5243                                | molecules/cell     | [66]                                      | Number of PD-L2 receptors expressed on each cancer cell (maximum taken as max from mAPC levels)                                                                                                                                                                                                                                                                                     |
| <b>PDL2_receptors-per-mAPC</b>  | 5243                                | molecules/cell     | [66]                                      | Maximum number of PD-L2 receptors expressed on each mAPC                                                                                                                                                                                                                                                                                                                            |
| <b>Phago_Debris</b>             | 1E-7                                | 1/(mole*day)       | [34, 41]                                  | Tumor antigen uptake rate by APCs                                                                                                                                                                                                                                                                                                                                                   |
| <b>Precursor_Frequen_NT</b>     | Calculated                          | dimensionless      | [72, 79]                                  | Calculates the ratio of available Naive T cells for priming phase 1 to total T cells in the lymph nodes                                                                                                                                                                                                                                                                             |
| <b>Precursor_Frequen_PNT</b>    | Calculated                          | dimensionless      | [72, 79]                                  | Calculates the ratio of available Primed Naive T cells for priming phase 2 to total T cells in the lymph nodes                                                                                                                                                                                                                                                                      |
| <b>PrimeNT_rate</b>             | 0.05775                             | 1/hour             | [59-61]                                   | Rate constant defining the approximate half-life of the entire first phase of priming in the lymph nodes, including the priming of all of the superficial Naïve T cells and those in the deep T-cell areas in the lymph node. This, along with the second priming phase, accounts for T cells starting to proliferate 1.5-2 days following the encounter of antigens on mAPCs [61]. |
| <b>PrimeNT1_rate</b>            | 2.772                               | 1/hour             | [59, 60, 80]                              | Rate constant defining the approximate half-life of each interaction between Naive T cells and mAPCs during the first phase of priming in the lymph nodes, including the formation time of mature synapses between the Naive T cells and the mAPCs.                                                                                                                                 |
| <b>PrimeTLN2_rate</b>           | 1.386                               | 1/hour             | [59, 60]                                  | Rate constant defining the approximate half-life of each interaction between Primed Naive T cells and mAPCs during the second phase of priming in the lymph nodes, which was dominated by stable T-cell-mAPC interactions.                                                                                                                                                          |
| <b>Prob_NT-mAPC_Interact</b>    | Calculated                          | dimensionless      | [72]                                      | Calculates the probability in a deterministic manner that at least one successful priming interaction will occur between Naive T cells and mAPCs during the first phase of priming                                                                                                                                                                                                  |
| <b>Prob_PNT-mAPC_Interact</b>   | Calculated                          | dimensionless      | [72]                                      | Calculates the probability in a deterministic manner that at least one successful priming interaction will occur between Primed Naive T cells and mAPCs during the second phase of priming                                                                                                                                                                                          |
| <b>Prolif_Fract</b>             | 718.303810<br>81261                 | 1/hour             | [19, 60, 62]                              | Proliferation threshold for fully primed and activated T cells in the lymph nodes that are undergoing proliferation. The T cells were optimized to account for 3 divisions per day over 5 days.                                                                                                                                                                                     |
| <b>Prolif_Thresh</b>            | 93.3228814<br>9744991<br>8.00049841 | 1/hour             | [19, 60, 62]                              | Proliferation level for fully primed and activated T cells in the lymph nodes that are undergoing proliferation. The T cells were optimized to account for 3 divisions per day over 5 days.                                                                                                                                                                                         |
| <b>Q_L</b>                      | 9                                   | L/day              | [56]                                      | Lymph flow rate for antibody transport                                                                                                                                                                                                                                                                                                                                              |
| <b>QC_GI</b>                    | 468                                 | ml/minute          | [13]                                      | Blood flow rate in GI                                                                                                                                                                                                                                                                                                                                                               |
| <b>QC_Liver</b>                 | 800                                 | ml/minute          | [13]                                      | Blood flow rate in Liver                                                                                                                                                                                                                                                                                                                                                            |
| <b>QC_LN</b>                    | 138                                 | ml/minute          | [13]                                      | Blood flow rate in Lymph Node                                                                                                                                                                                                                                                                                                                                                       |
| <b>QC_Lungs</b>                 | 3000                                | ml/minute          | [13]                                      | Blood flow rate in Lungs                                                                                                                                                                                                                                                                                                                                                            |
| <b>QC_Periph</b>                | 1521                                | ml/minute          | [13]                                      | Blood flow rate in Periphery                                                                                                                                                                                                                                                                                                                                                        |
| <b>QC_Spleen</b>                | 138                                 | ml/minute          | [13]                                      | Blood flow rate in Spleen                                                                                                                                                                                                                                                                                                                                                           |
| <b>QC_Tmr</b>                   | 0.564                               | ml/minute          | [13]                                      | Blood flow rate in Tumor                                                                                                                                                                                                                                                                                                                                                            |

| Variable                               | Value                                   | Units                            | Source                                            | Description                                                                                                                                     |
|----------------------------------------|-----------------------------------------|----------------------------------|---------------------------------------------------|-------------------------------------------------------------------------------------------------------------------------------------------------|
| <b>Rate_Tumor_Growth</b>               | 64/144 day doubling:<br>see description | 1/day                            | [81]                                              | Proliferation rate of cancer cells that defines the volumetric doubling time of the tumor.                                                      |
| <b>s_Assoc</b>                         | 5.27                                    | Dimensionless                    | [51]                                              | 64 day metastatic doubling: 0.010955675075414<br>144 day non-metastatic doubling: 0.004913635262592                                             |
| <b>S_LNB</b>                           | 166                                     | cm <sup>2</sup> /cm <sup>3</sup> | [68]                                              | Effector:Target cell association/killing EC50<br>Surface are of vasculature per volume Lymph Node for antibody transport                        |
| <b>S_TB</b>                            | 108                                     | cm <sup>2</sup> /cm <sup>3</sup> | [68]                                              | Surface are of vasculature per volume Tumor for antibody transport                                                                              |
| <b>Sig_MDSC<sup>Teff</sup> = Other</b> | 0.15                                    | dimensionless                    | Assumed                                           | Fraction of inhibitory effect that other factors expressed by MDSCs have on the Effector T cells in the tumor                                   |
| <b>Sig_MDSC<sup>Teff</sup>=CD80</b>    | Calculated                              | dimensionless                    | Calculated with RO; see algebraic equations below | Fraction of CD80 receptors expressed on Effector T cells that are interacting with PD-L1 on the MDSCs in the lymph nodes                        |
| <b>Sig_MDSC<sup>Teff</sup>=PD1</b>     | Calculated                              | dimensionless                    | Calculated with RO; see algebraic equations below | Fraction of PD-1 receptors expressed on Effector T cells that are interacting with PD-L1 on the MDSCs in the lymph nodes                        |
| <b>Sig_MDSC<sup>Teff</sup>=PDL1</b>    | Calculated                              | dimensionless                    | Calculated with RO; see algebraic equations below | Fraction of PD-L1 receptors expressed on Effector T cells that are interacting with PD-1 on the MDSCs in the lymph nodes                        |
| <b>Sig_MDSC<sup>Teff</sup>=Total</b>   | Calculated                              | dimensionless                    | Calculated with RO; see algebraic equations below | Total inhibitory fraction that MDSCs have on the Effector T cells in the tumor following their interaction                                      |
| <b>Sig_NT=CD28</b>                     | Calculated                              | dimensionless                    | Calculated with RO; see algebraic equations below | Positive CD28 co-receptor fraction signaling on Naive T cells by CD80 and CD86 on mAPC in the lymph nodes following their interaction           |
| <b>Sig_PNT=CTLA4/PD1/L1/CD80</b>       | Calculated                              | dimensionless                    | Calculated with RO; see algebraic equations below | Total inhibitory fraction that mAPCs have on the Effector T cells during priming following their interaction                                    |
| <b>Sig_T=Other</b>                     | 0.15                                    | dimensionless                    | Calculated with RO; see algebraic equations below | Fraction of inhibitory effect that other factors expressed by all cancer cells have on the Effector T cells in the tumor                        |
| <b>Sig_T1=Total</b>                    | Calculated                              | dimensionless                    | Calculated with RO; see algebraic equations below | Total fraction of inhibitory effect that cancer cells expressing only other factors have on the Effector T cells in the tumor                   |
| <b>Sig_T10=Total</b>                   | Calculated                              | dimensionless                    | Calculated with RO; see algebraic equations below | Total fraction of inhibitory effect that cancer cells expressing PD-1, PD-L1, PD-L2 and other factors have on the Effector T cells in the tumor |
| <b>Sig_T10a=PDL1</b>                   | Calculated                              | dimensionless                    | Calculated with RO; see algebraic equations below | Fraction of PD-L1 receptors on Effector T cells that are occupied by PD-1 expressed on the T10 subset of cancer cells in the tumor              |
| <b>Sig_T10b=PD1</b>                    | Calculated                              | dimensionless                    | Calculated with RO; see algebraic equations below | Fraction of PD-1 receptors on Effector T cells that are occupied by PD-L1 and PD-L2 expressed on the T10 subset of cancer cells in the tumor    |
| <b>Sig_T10c=CD80</b>                   | Calculated                              | dimensionless                    | Calculated with RO; see algebraic equations below | Fraction of CD80 receptors on Effector T cells that are occupied by PD-L1 expressed on the T10 subset of cancer cells in the tumor              |
| <b>Sig_T11=Total</b>                   | Calculated                              | dimensionless                    | Calculated with RO; see algebraic equations below | Total fraction of inhibitory effect that cancer cells expressing PD-L1, CD80 and other factors have on the Effector T cells in the tumor        |
| <b>Sig_T11a=PDL1</b>                   | Calculated                              | dimensionless                    | Calculated with RO; see algebraic equations below | Fraction of PD-L1 receptors on Effector T cells that are occupied by CD80 expressed on the T11 subset of cancer cells in the tumor              |
| <b>Sig_T11b=PD1</b>                    | Calculated                              | dimensionless                    | Calculated with RO; see algebraic equations below | Fraction of PD-1 receptors on Effector T cells that are occupied by PD-L1 expressed on the T11 subset of cancer cells in the tumor              |
| <b>Sig_T12=Total</b>                   | Calculated                              | dimensionless                    | Calculated with RO; see algebraic equations below | Total fraction of inhibitory effect that cancer cells expressing PD-L2, CD80 and other factors have on the Effector T cells in the tumor        |
| <b>Sig_T12a=PDL1</b>                   | Calculated                              | dimensionless                    | Calculated with RO; see algebraic equations below | Fraction of PD-L1 receptors on Effector T cells that are occupied by CD80 expressed on the T12 subset of cancer cells in the tumor              |
| <b>Sig_T12b=PD1</b>                    | Calculated                              | dimensionless                    | Calculated with RO; see algebraic equations below | Fraction of PD-1 receptors on Effector T cells that are occupied by PD-L2 expressed on the T12 subset of cancer cells in the tumor              |



| Variable                     | Value       | Units         | Source                                            | Description                                                                                                                                 |
|------------------------------|-------------|---------------|---------------------------------------------------|---------------------------------------------------------------------------------------------------------------------------------------------|
| <b>Sig_T6=Total</b>          | Calculated  | dimensionless | Calculated with RO; see algebraic equations below | Total fraction of inhibitory effect that cancer cells expressing PD-1, PD-L1 and other factors have on the Effector T cells in the tumor    |
| <b>Sig_T6a=PDL1</b>          | Calculated  | dimensionless | Calculated with RO; see algebraic equations below | Fraction of PD-L1 receptors on Effector T cells that are occupied by PD-1 expressed on the T6 subset of cancer cells in the tumor           |
| <b>Sig_T6b=PD1</b>           | Calculated  | dimensionless | Calculated with RO; see algebraic equations below | Fraction of PD-1 receptors on Effector T cells that are occupied by PD-L1 expressed on the T6 subset of cancer cells in the tumor           |
| <b>Sig_T6c=CD80</b>          | Calculated  | dimensionless | Calculated with RO; see algebraic equations below | Fraction of CD80 receptors on Effector T cells that are occupied by PD-L1 expressed on the T6 subset of cancer cells in the tumor           |
| <b>Sig_T7=Total</b>          | Calculated  | dimensionless | Calculated with RO; see algebraic equations below | Total fraction of inhibitory effect that cancer cells expressing PD-1, PD-L2 and other factors have on the Effector T cells in the tumor    |
| <b>Sig_T7a=PDL1</b>          | Calculated  | dimensionless | Calculated with RO; see algebraic equations below | Fraction of PD-L1 receptors on Effector T cells that are occupied by PD-1 expressed on the T7 subset of cancer cells in the tumor           |
| <b>Sig_T7b=PD1</b>           | Calculated  | dimensionless | Calculated with RO; see algebraic equations below | Fraction of PD-1 receptors on Effector T cells that are occupied by PD-L2 expressed on the T7 subset of cancer cells in the tumor           |
| <b>Sig_T8=Total</b>          | Calculated  | dimensionless | Calculated with RO; see algebraic equations below | Total fraction of inhibitory effect that cancer cells expressing PD-L1, PD-L2 and other factors have on the Effector T cells in the tumor   |
| <b>Sig_T8a=PD1</b>           | Calculated  | dimensionless | Calculated with RO; see algebraic equations below | Fraction of PD-1 receptors on Effector T cells that are occupied by PD-L1 and PD-L2 expressed on the T8 subset of cancer cells in the tumor |
| <b>Sig_T8b=CD80</b>          | Calculated  | dimensionless | Calculated with RO; see algebraic equations below | Fraction of CD80 receptors on Effector T cells that are occupied by PD-L1 expressed on the T8 subset of cancer cells in the tumor           |
| <b>Sig_T9=PDL1</b>           | Calculated  | dimensionless | Calculated with RO; see algebraic equations below | Fraction of PD-L1 receptors on Effector T cells that are occupied by PD-1 and CD80 expressed on the T9 subset of cancer cells in the tumor  |
| <b>Sig_T9=Total</b>          | Calculated  | dimensionless | Calculated with RO; see algebraic equations below | Total fraction of inhibitory effect that cancer cells expressing PD-1, CD80 and other factors have on the Effector T cells in the tumor     |
| <b>Sig_TrAPC = Other</b>     | 0           | dimensionless | Calculated with RO; see algebraic equations below | Fraction of inhibitory effect that other factors expressed by T Regulatory cells have on the mAPCs in the tumor                             |
| <b>Sig_TrAPCT=CTLA4</b>      | Calculated  | dimensionless | Calculated with RO; see algebraic equations below | Fraction of CD80 and CD86 receptors on mAPCs that are occupied by CTLA-4 expressed on T Regulatory cells in the tumor                       |
| <b>Sig_TrAPCT=Total</b>      | Calculated  | dimensionless | Calculated with RO; see algebraic equations below | Total inhibitory fraction that T Regulatory cells have on the mAPCs in the tumor following their interaction                                |
| <b>Sig_TrPNT=PD1/L1/CD80</b> | Calculated  | dimensionless | Calculated with RO; see algebraic equations below | Total inhibitory fraction that T Regulatory cells have on the Primed Naive T cells in the lymph nodes following their interaction           |
| <b>Sig_TrTeff = Other</b>    | 0.15        | dimensionless | Calculated with RO; see algebraic equations below | Fraction of inhibitory effect that other factors expressed by T Regulatory cells have on the Effector T cells in the tumor                  |
| <b>Sig_TrTeff=CD80</b>       | Calculated  | dimensionless | Calculated with RO; see algebraic equations below | Fraction of CD80 receptors expressed on Effector T cells that are interacting with PD-L1 on the T Regulatory cells in the lymph nodes       |
| <b>Sig_TrTeff=PD1</b>        | Calculated  | dimensionless | Calculated with RO; see algebraic equations below | Fraction of PD-1 receptors expressed on Effector T cells that are interacting with PD-L1 on the T Regulatory cells in the lymph nodes       |
| <b>Sig_TrTeff=PDL1</b>       | Calculated  | dimensionless | Calculated with RO; see algebraic equations below | Fraction of PD-L1 receptors expressed on Effector T cells that are interacting with PD-1 on the T Regulatory cells in the lymph nodes       |
| <b>Sig_TrTeff=Total</b>      | Calculated  | dimensionless | Calculated with RO; see algebraic equations below | Total inhibitory fraction that T Regulatory cells have on the Effector T cells in the tumor following their interaction                     |
| <b>Sigma1_CTLA4</b>          | 0.996839823 | dimensionless | [56]                                              | Estimated leaky tissue reflection coefficient for anti-CTLA-4 therapy                                                                       |
| <b>Sigma1_PD1</b>            | 0.912199893 | dimensionless | [56]                                              | Estimated leaky tissue reflection coefficient for anti-PD-1 therapy                                                                         |
| <b>Sigma1_PDL1</b>           | 0.990145236 | dimensionless | [56]                                              | Estimated leaky tissue reflection coefficient for anti-PD-L1 therapy                                                                        |

| Variable                    | Value       | Units         | Source                                            | Description                                                                                                                                                      |
|-----------------------------|-------------|---------------|---------------------------------------------------|------------------------------------------------------------------------------------------------------------------------------------------------------------------|
| <b>Sigma2_CTLA4</b>         | 0.97448852  | dimensionless | [56]                                              | Estimated tight tissue reflection coefficient for anti-CTLA-4 therapy                                                                                            |
| <b>Sigma2_PD1</b>           | 0.89230685  | dimensionless | [56]                                              | Estimated tight tissue reflection coefficient for anti-PD-1 therapy                                                                                              |
| <b>Sigma2_PDL1</b>          | 0.988702857 | dimensionless | [56]                                              | Estimated tight tissue reflection coefficient for anti-PD-L1 therapy                                                                                             |
| <b>SigmaL</b>               | 0.2         | dimensionless | [56]                                              | Lymphatic tissue reflection coefficient                                                                                                                          |
| <b>Sigmax_MDSCTeff=CD80</b> | 0.033934378 | dimensionless | Calculated with RO; see algebraic equations below | Maximum fraction of CD80 receptors expressed on Effector T cells that are interacting with PD-L1 on the MDSCs in the lymph nodes                                 |
| <b>Sigmax_MDSCTeff=PD1</b>  | 0.073903164 | dimensionless | Calculated with RO; see algebraic equations below | Maximum fraction of PD-1 receptors expressed on Effector T cells that are interacting with PD-L1 on the MDSCs in the lymph nodes                                 |
| <b>Sigmax_MDSCTeff=PDL1</b> | 0.028530339 | dimensionless | Calculated with RO; see algebraic equations below | Maximum fraction of PD-L1 receptors expressed on Effector T cells that are interacting with PD-1 on the MDSCs in the lymph nodes                                 |
| <b>Sigmax_NT=CD28</b>       | 0.839539945 | dimensionless | Calculated with RO; see algebraic equations below | Maximum fraction of CD28 co-receptor interaction on Naive T cells by CD80 and CD86 on mAPC in the lymph nodes                                                    |
| <b>Sigmax_PNT=CD80</b>      | 0.013125    | dimensionless | Calculated with RO; see algebraic equations below | Maximum fraction of total CD80 receptors on Primed Naïve T cells that can interact with the PD-L1 receptors on mAPCs during priming in the lymph nodes           |
| <b>Sigmax_PNT=CTLA4</b>     | 0.564375    | dimensionless | Calculated with RO; see algebraic equations below | Maximum fraction of total CTLA-4 receptors on Primed Naïve T cells that can interact with the CD80 and CD86 receptors on mAPCs during priming in the lymph nodes |
| <b>Sigmax_PNT=PD1</b>       | 0.02625     | dimensionless | Calculated with RO; see algebraic equations below | Maximum fraction of total PD-1 receptors on Primed Naïve T cells that can interact with the PD-L1 and PD-L2 receptors on mAPCs during priming in the lymph nodes |
| <b>Sigmax_PNT=PDL1</b>      | 0.02625     | dimensionless | Calculated with RO; see algebraic equations below | Maximum fraction of total PD-L1 receptors on Primed Naïve T cells that can interact with the PD-1 and CD80 receptors on mAPCs during priming in the lymph nodes  |
| <b>Sigmax_T10a=PDL1</b>     | 0.033991727 | dimensionless | Calculated with RO; see algebraic equations below | Maximum fraction of PD-L1 receptors on Effector T cells that are occupied by PD-1 expressed on the T10 subset of cancer cells in the tumor                       |
| <b>Sigmax_T10b=PD1</b>      | 0.24079052  | dimensionless | Calculated with RO; see algebraic equations below | Maximum fraction of PD-1 receptors on Effector T cells that are occupied by PD-L1 and PD-L2 expressed on the T10 subset of cancer cells in the tumor             |
| <b>Sigmax_T10c=CD80</b>     | 0.106540763 | dimensionless | Calculated with RO; see algebraic equations below | Maximum fraction of CD80 receptors on Effector T cells that are occupied by PD-L1 expressed on the T10 subset of cancer cells in the tumor                       |
| <b>Sigmax_T11a=PDL1</b>     | 0.048200501 | dimensionless | Calculated with RO; see algebraic equations below | Maximum fraction of PD-L1 receptors on Effector T cells that are occupied by CD80 expressed on the T11 subset of cancer cells in the tumor                       |
| <b>Sigmax_T11b=PD1</b>      | 0.229183607 | dimensionless | Calculated with RO; see algebraic equations below | Maximum fraction of PD-1 receptors on Effector T cells that are occupied by PD-L1 expressed on the T11 subset of cancer cells in the tumor                       |
| <b>Sigmax_T12a=PDL1</b>     | 0.048200501 | dimensionless | Calculated with RO; see algebraic equations below | Maximum fraction of PD-L1 receptors on Effector T cells that are occupied by CD80 expressed on the T12 subset of cancer cells in the tumor                       |
| <b>Sigmax_T12b=PD1</b>      | 0.064134991 | dimensionless | Calculated with RO; see algebraic equations below | Maximum fraction of PD-1 receptors on Effector T cells that are occupied by PD-L2 expressed on the T12 subset of cancer cells in the tumor                       |
| <b>Sigmax_T13a=PDL1</b>     | 0.048200501 | dimensionless | Calculated with RO; see algebraic equations below | Maximum fraction of PD-L1 receptors on Effector T cells that are occupied by CD80 expressed on the T13 subset of cancer cells in the tumor                       |
| <b>Sigmax_T13b=PD1</b>      | 0.26059594  | dimensionless | Calculated with RO; see algebraic equations below | Maximum fraction of PD-1 receptors on Effector T cells that are occupied by PD-L1 and PD-L2 expressed on the T13 subset of cancer cells in the tumor             |
| <b>Sigmax_T14a=PDL1</b>     | 0.078099729 | dimensionless | Calculated with RO; see algebraic equations below | Maximum fraction of PD-L1 receptors on Effector T cells that are occupied by CD80 and PD-1 expressed on the T14 subset of cancer cells in the tumor              |

| Variable                   | Value       | Units         | Source                                            | Description                                                                                                                                          |
|----------------------------|-------------|---------------|---------------------------------------------------|------------------------------------------------------------------------------------------------------------------------------------------------------|
| <b>Sigmax_T14b=PD1</b>     | 0.206595509 | dimensionless | Calculated with RO; see algebraic equations below | Maximum fraction of PD-1 receptors on Effector T cells that are occupied by PD-L1 expressed on the T14 subset of cancer cells in the tumor           |
| <b>Sigmax_T14c=CD80</b>    | 0.106540762 | dimensionless | Calculated with RO; see algebraic equations below | Maximum fraction of CD80 receptors on Effector T cells that are occupied by PD-L1 expressed on the T14 subset of cancer cells in the tumor           |
| <b>Sigmax_T15a=PDL1</b>    | 0.078099729 | dimensionless | Calculated with RO; see algebraic equations below | Maximum fraction of PD-L1 receptors on Effector T cells that are occupied by CD80 and PD-1 expressed on the T15 subset of cancer cells in the tumor  |
| <b>Sigmax_T15b=PD1</b>     | 0.064134991 | dimensionless | Calculated with RO; see algebraic equations below | Maximum fraction of PD-1 receptors on Effector T cells that are occupied by PD-L2 expressed on the T15 subset of cancer cells in the tumor           |
| <b>Sigmax_T16a=PDL1</b>    | 0.078099729 | dimensionless | Calculated with RO; see algebraic equations below | Maximum fraction of PD-L1 receptors on Effector T cells that are occupied by CD80 and PD-1 expressed on the T16 subset of cancer cells in the tumor  |
| <b>Sigmax_T16b=PD1</b>     | 0.24079052  | dimensionless | Calculated with RO; see algebraic equations below | Maximum fraction of PD-1 receptors on Effector T cells that are occupied by PD-L1 and PD-L2 expressed on the T16 subset of cancer cells in the tumor |
| <b>Sigmax_T16c=CD80</b>    | 0.106540763 | dimensionless | Calculated with RO; see algebraic equations below | Maximum fraction of CD80 receptors on Effector T cells that are occupied by PD-L1 expressed on the T16 subset of cancer cells in the tumor           |
| <b>Sigmax_T2=PDL1</b>      | 0.033991727 | dimensionless | Calculated with RO; see algebraic equations below | Maximum fraction of PD-L1 receptors on Effector T cells that are occupied by PD-1 expressed on the T2 subset of cancer cells in the tumor            |
| <b>Sigmax_T3a=PD1</b>      | 0.206595509 | dimensionless | Calculated with RO; see algebraic equations below | Maximum fraction of PD-1 receptors on Effector T cells that are occupied by PD-L1 expressed on the T3 subset of cancer cells in the tumor            |
| <b>Sigmax_T3b=CD80</b>     | 0.106540753 | dimensionless | Calculated with RO; see algebraic equations below | Maximum fraction of CD80 receptors on Effector T cells that are occupied by PD-L1 expressed on the T3 subset of cancer cells in the tumor            |
| <b>Sigmax_T4=PD1</b>       | 0.064134991 | dimensionless | Calculated with RO; see algebraic equations below | Maximum fraction of PD-1 receptors on Effector T cells that are occupied by PD-L2 expressed on the T4 subset of cancer cells in the tumor            |
| <b>Sigmax_T5=PDL1</b>      | 0.048200501 | dimensionless | Calculated with RO; see algebraic equations below | Maximum fraction of PD-L1 receptors on Effector T cells that are occupied by CD80 expressed on the T5 subset of cancer cells in the tumor            |
| <b>Sigmax_T6a=PDL1</b>     | 0.033991727 | dimensionless | Calculated with RO; see algebraic equations below | Maximum fraction of PD-L1 receptors on Effector T cells that are occupied by PD-1 expressed on the T6 subset of cancer cells in the tumor            |
| <b>Sigmax_T6b=PD1</b>      | 0.206595509 | dimensionless | Calculated with RO; see algebraic equations below | Maximum fraction of PD-1 receptors on Effector T cells that are occupied by PD-L1 expressed on the T6 subset of cancer cells in the tumor            |
| <b>Sigmax_T6c=CD80</b>     | 0.106540761 | dimensionless | Calculated with RO; see algebraic equations below | Maximum fraction of CD80 receptors on Effector T cells that are occupied by PD-L1 expressed on the T6 subset of cancer cells in the tumor            |
| <b>Sigmax_T7a=PDL1</b>     | 0.033991727 | dimensionless | Calculated with RO; see algebraic equations below | Maximum fraction of PD-L1 receptors on Effector T cells that are occupied by PD-1 expressed on the T7 subset of cancer cells in the tumor            |
| <b>Sigmax_T7b=PD1</b>      | 0.064134991 | dimensionless | Calculated with RO; see algebraic equations below | Maximum fraction of PD-1 receptors on Effector T cells that are occupied by PD-L2 expressed on the T7 subset of cancer cells in the tumor            |
| <b>Sigmax_T8a=PD1</b>      | 0.24079052  | dimensionless | Calculated with RO; see algebraic equations below | Maximum fraction of PD-1 receptors on Effector T cells that are occupied by PD-L1 and PD-L2 expressed on the T8 subset of cancer cells in the tumor  |
| <b>Sigmax_T8b=CD80</b>     | 0.104091855 | dimensionless | Calculated with RO; see algebraic equations below | Maximum fraction of CD80 receptors on Effector T cells that are occupied by PD-L1 expressed on the T8 subset of cancer cells in the tumor            |
| <b>Sigmax_T9=PDL1</b>      | 0.078099729 | dimensionless | Calculated with RO; see algebraic equations below | Maximum fraction of PD-L1 receptors on Effector T cells that are occupied by PD-1 and CD80 expressed on the T9 subset of cancer cells in the tumor   |
| <b>Sigmax_TrAPCT=CTLA4</b> | 0.0008355   | dimensionless | Calculated with RO; see algebraic equations below | Maximum fraction of CD80 and CD86 receptors on mAPCs that are occupied by CTLA-4 expressed on T Regulatory cells in the tumor                        |

| Variable                       | Value       | Units         | Source                                                                   | Description                                                                                                                                                                                          |
|--------------------------------|-------------|---------------|--------------------------------------------------------------------------|------------------------------------------------------------------------------------------------------------------------------------------------------------------------------------------------------|
| <b>Sigmax_TrPNT=CD80</b>       | 0.020305139 | dimensionless | Calculated with RO; see algebraic equations below                        | Maximum fraction of total CD80 receptors on Primed Naïve T cells that are involved in interacting with the PD-L1 receptors on Regulatory T cells during priming in the lymph nodes                   |
| <b>Sigmax_TrPNT=Other</b>      | 1           | dimensionless | Calculated with RO; see algebraic equations below                        | Maximum level of inhibitory effects against Primed Naive T cells by other factors expressed by T Regulatory cells                                                                                    |
| <b>Sigmax_TrPNT=PD1</b>        | 0.034241129 | dimensionless | Calculated with RO; see algebraic equations below                        | Maximum fraction of total PD-1 receptors on Primed Naïve T cells that are involved in interacting with the PD-L1 receptors on Regulatory T cells during priming in the lymph nodes                   |
| <b>Sigmax_TrPNT=PDL1</b>       | 0.010435276 | dimensionless | Calculated with RO; see algebraic equations below                        | Maximum fraction of total PD-L1 receptors on Primed Naïve T cells that are involved in interacting with the PD-1 receptors on Regulatory T cells during priming in the lymph nodes                   |
| <b>Sigmax_TrTeff=CD80</b>      | 0.033934413 | dimensionless | Calculated with RO; see algebraic equations below                        | Maximum fraction of CD80 receptors expressed on Effector T cells that are interacting with PD-L1 on the T Regulatory cells in the tumor                                                              |
| <b>Sigmax_TrTeff=PD1</b>       | 0.073903236 | dimensionless | Calculated with RO; see algebraic equations below                        | Maximum fraction of PD-1 receptors expressed on Effector T cells that are interacting with PD-L1 on the T Regulatory cells in the tumor                                                              |
| <b>Sigmax_TrTeff=PDL1</b>      | 0.028530371 | dimensionless | Calculated with RO; see algebraic equations below                        | Maximum fraction of PD-L1 receptors expressed on Effector T cells that are interacting with PD-1 on the T Regulatory cells in the tumor                                                              |
| <b>Sigweight_MDSCTeff=CD80</b> | 0.248844361 | dimensionless | Calculated as fraction of RO per total RO; see algebraic equations below | Weight of Effector T cell inhibition by signaling through CD80 receptors expressed on Effector T cells that are interacting with PD-L1 on the MDSCs in the tumor                                     |
| <b>Sigweight_MDSCTeff=PD1</b>  | 0.541939663 | dimensionless | Calculated as fraction of RO per total RO; see algebraic equations below | Weight of Effector T cell inhibition by signaling through PD-1 receptors expressed on Effector T cells that are interacting with PD-L1 on the MDSCs in the tumor                                     |
| <b>Sigweight_MDSCTeff=PDL1</b> | 0.209215976 | dimensionless | Calculated as fraction of RO per total RO; see algebraic equations below | Weight of Effector T cell inhibition by signaling through PD-L1 receptors expressed on Effector T cells that are interacting with PD-1 on the MDSCs in the tumor                                     |
| <b>SigWeight_PNT=CD80</b>      | 0.020833333 | dimensionless | Calculated as fraction of RO per total RO; see algebraic equations below | Weight of Primed Naive T cell inhibition by signaling through CD80 receptors on Primed Naïve T cells that can interact with the PD-L1 receptors on mAPCs during priming in the lymph nodes           |
| <b>SigWeight_PNT=CTLA4</b>     | 0.895833333 | dimensionless | Calculated as fraction of RO per total RO; see algebraic equations below | Weight of Primed Naive T cell inhibition by signaling through CTLA-4 receptors on Primed Naïve T cells that can interact with the CD80 and CD86 receptors on mAPCs during priming in the lymph nodes |
| <b>SigWeight_PNT=PD1</b>       | 0.041666667 | dimensionless | Calculated as fraction of RO per total RO; see algebraic equations below | Weight of Primed Naive T cell inhibition by signaling through PD-1 receptors on Primed Naïve T cells that can interact with the PD-L1 and PD-L2 receptors on mAPCs during priming in the lymph nodes |
| <b>SigWeight_PNT=PDL1</b>      | 0.041666667 | dimensionless | Calculated as fraction of RO per total RO; see algebraic equations below | Weight of Primed Naive T cell inhibition by signaling through PD-L1 receptors on Primed Naïve T cells that can interact with the PD-1 and CD80 receptors on mAPCs during priming in the lymph nodes  |
| <b>Sigweight_T10a=PD1</b>      | 0.089141557 | dimensionless | Calculated as fraction of RO per total RO; see algebraic equations below | Weight of Effector T cell inhibition by signaling through PD-L1 receptors on Effector T cells that are occupied by PD-1 expressed on the T10 subset of cancer cells in the tumor                     |
| <b>Sigweight_T10b=PD1</b>      | 0.631460767 | dimensionless | Calculated as fraction of RO per total RO; see algebraic equations below | Weight of Effector T cell inhibition by signaling through PD-1 receptors on Effector T cells that are occupied by PD-L1 and PD-L2 expressed on the T10 subset of cancer cells in the tumor           |



| Variable                   | Value       | Units         | Source                                                                   | Description                                                                                                                                                                                |
|----------------------------|-------------|---------------|--------------------------------------------------------------------------|--------------------------------------------------------------------------------------------------------------------------------------------------------------------------------------------|
| <b>Sigweight_T10c=CD80</b> | 0.279397677 | dimensionless | Calculated as fraction of RO per total RO; see algebraic equations below | Weight of Effector T cell inhibition by signaling through CD80 receptors on Effector T cells that are occupied by PD-L1 expressed on the T10 subset of cancer cells in the tumor           |
| <b>Sigweight_T11a=PDL1</b> | 0.173768069 | dimensionless | Calculated as fraction of RO per total RO; see algebraic equations below | Weight of Effector T cell inhibition by signaling through PD-L1 receptors on Effector T cells that are occupied by CD80 expressed on the T11 subset of cancer cells in the tumor           |
| <b>Sigweight_T11b=PD1</b>  | 0.826231931 | dimensionless | Calculated as fraction of RO per total RO; see algebraic equations below | Weight of Effector T cell inhibition by signaling through PD-1 receptors on Effector T cells that are occupied by PD-L1 expressed on the T11 subset of cancer cells in the tumor           |
| <b>Sigweight_T12a=PDL1</b> | 0.429076332 | dimensionless | Calculated as fraction of RO per total RO; see algebraic equations below | Weight of Effector T cell inhibition by signaling through PD-L1 receptors on Effector T cells that are occupied by CD80 expressed on the T12 subset of cancer cells in the tumor           |
| <b>Sigweight_T12b=PD1</b>  | 0.570923668 | dimensionless | Calculated as fraction of RO per total RO; see algebraic equations below | Weight of Effector T cell inhibition by signaling through PD-1 receptors on Effector T cells that are occupied by PD-L2 expressed on the T12 subset of cancer cells in the tumor           |
| <b>Sigweight_T13a=PDL1</b> | 0.156091504 | dimensionless | Calculated as fraction of RO per total RO; see algebraic equations below | Weight of Effector T cell inhibition by signaling through PD-L1 receptors on Effector T cells that are occupied by CD80 expressed on the T13 subset of cancer cells in the tumor           |
| <b>Sigweight_T13b=PD1</b>  | 0.843908496 | dimensionless | Calculated as fraction of RO per total RO; see algebraic equations below | Weight of Effector T cell inhibition by signaling through PD-1 receptors on Effector T cells that are occupied by PD-L1 and PD-L2 expressed on the T13 subset of cancer cells in the tumor |
| <b>Sigweight_T14a=PDL1</b> | 0.199623063 | dimensionless | Calculated as fraction of RO per total RO; see algebraic equations below | Weight of Effector T cell inhibition by signaling through PD-L1 receptors on Effector T cells that are occupied by CD80 and PD-1 expressed on the T14 subset of cancer cells in the tumor  |
| <b>Sigweight_T14b=PD1</b>  | 0.528058536 | dimensionless | Calculated as fraction of RO per total RO; see algebraic equations below | Weight of Effector T cell inhibition by signaling through PD-1 receptors on Effector T cells that are occupied by PD-L1 expressed on the T14 subset of cancer cells in the tumor           |
| <b>Sigweight_T14c=CD80</b> | 0.272318401 | dimensionless | Calculated as fraction of RO per total RO; see algebraic equations below | Weight of Effector T cell inhibition by signaling through CD80 receptors on Effector T cells that are occupied by PD-L1 expressed on the T14 subset of cancer cells in the tumor           |
| <b>Sigweight_T15a=PDL1</b> | 0.549090467 | dimensionless | Calculated as fraction of RO per total RO; see algebraic equations below | Weight of Effector T cell inhibition by signaling through PD-L1 receptors on Effector T cells that are occupied by CD80 and PD-1 expressed on the T15 subset of cancer cells in the tumor  |
| <b>Sigweight_T15b=PD1</b>  | 0.450909533 | dimensionless | Calculated as fraction of RO per total RO; see algebraic equations below | Weight of Effector T cell inhibition by signaling through PD-1 receptors on Effector T cells that are occupied by PD-L2 expressed on the T15 subset of cancer cells in the tumor           |
| <b>Sigweight_T16a=PDL1</b> | 0.183577893 | dimensionless | Calculated as fraction of RO per total RO; see algebraic equations below | Weight of Effector T cell inhibition by signaling through PD-L1 receptors on Effector T cells that are occupied by CD80 and PD-1 expressed on the T16 subset of cancer cells in the tumor  |
| <b>Sigweight_T16b=PD1</b>  | 0.565991931 | dimensionless | Calculated as fraction of RO per total RO; see                           | Weight of Effector T cell inhibition by signaling through PD-1 receptors on Effector T cells that are occupied by PD-L1 and PD-L2 expressed on the T16 subset of cancer cells in the tumor |

| Variable                   | Value       | Units         | Source                                                                   | Description                                                                                                                                                                               |
|----------------------------|-------------|---------------|--------------------------------------------------------------------------|-------------------------------------------------------------------------------------------------------------------------------------------------------------------------------------------|
|                            |             |               | algebraic equations below                                                |                                                                                                                                                                                           |
| <b>Sigweight_T16c=CD80</b> | 0.250430176 | dimensionless | Calculated as fraction of RO per total RO; see algebraic equations below | Weight of Effector T cell inhibition by signaling through CD80 receptors on Effector T cells that are occupied by PD-L1 expressed on the T16 subset of cancer cells in the tumor          |
| <b>Sigweight_T2=PDL1</b>   | 1           | dimensionless | Calculated as fraction of RO per total RO; see algebraic equations below | Weight of Effector T cell inhibition by signaling through PD-L1 receptors on Effector T cells that are occupied by PD-1 expressed on the T2 subset of cancer cells in the tumor           |
| <b>Sigweight_T3a=PD1</b>   | 0.659762327 | dimensionless | Calculated as fraction of RO per total RO; see algebraic equations below | Weight of Effector T cell inhibition by signaling through PD-1 receptors on Effector T cells that are occupied by PD-L1 expressed on the T3 subset of cancer cells in the tumor           |
| <b>Sigweight_T3b=CD80</b>  | 0.340237673 | dimensionless | Calculated as fraction of RO per total RO; see algebraic equations below | Weight of Effector T cell inhibition by signaling through CD80 receptors on Effector T cells that are occupied by PD-L1 expressed on the T3 subset of cancer cells in the tumor           |
| <b>Sigweight_T4=PD1</b>    | 1           | dimensionless | Calculated as fraction of RO per total RO; see algebraic equations below | Weight of Effector T cell inhibition by signaling through PD-1 receptors on Effector T cells that are occupied by PD-L2 expressed on the T4 subset of cancer cells in the tumor           |
| <b>Sigweight_T5=PDL1</b>   | 1           | dimensionless | Calculated as fraction of RO per total RO; see algebraic equations below | Weight of Effector T cell inhibition by signaling through PD-L1 receptors on Effector T cells that are occupied by CD80 expressed on the T5 subset of cancer cells in the tumor           |
| <b>Sigweight_T6a=PDL1</b>  | 0.097922746 | dimensionless | Calculated as fraction of RO per total RO; see algebraic equations below | Weight of Effector T cell inhibition by signaling through PD-L1 receptors on Effector T cells that are occupied by PD-1 expressed on the T6 subset of cancer cells in the tumor           |
| <b>Sigweight_T6b=PD1</b>   | 0.595156574 | dimensionless | Calculated as fraction of RO per total RO; see algebraic equations below | Weight of Effector T cell inhibition by signaling through PD-1 receptors on Effector T cells that are occupied by PD-L1 expressed on the T6 subset of cancer cells in the tumor           |
| <b>Sigweight_T6c=CD80</b>  | 0.30692068  | dimensionless | Calculated as fraction of RO per total RO; see algebraic equations below | Weight of Effector T cell inhibition by signaling through CD80 receptors on Effector T cells that are occupied by PD-L1 expressed on the T6 subset of cancer cells in the tumor           |
| <b>Sigweight_T7a=PDL1</b>  | 0.346406438 | dimensionless | Calculated as fraction of RO per total RO; see algebraic equations below | Weight of Effector T cell inhibition by signaling through PD-L1 receptors on Effector T cells that are occupied by PD-1 expressed on the T7 subset of cancer cells in the tumor           |
| <b>Sigweight_T7b=PD1</b>   | 0.653593562 | dimensionless | Calculated as fraction of RO of total ROs in signaling equation          | Weight of Effector T cell inhibition by signaling through PD-1 receptors on Effector T cells that are occupied by PD-L2 expressed on the T7 subset of cancer cells in the tumor           |
| <b>Sigweight_T8a=PD1</b>   | 0.698181576 | dimensionless | Calculated as fraction of RO per total RO; see algebraic equations below | Weight of Effector T cell inhibition by signaling through PD-1 receptors on Effector T cells that are occupied by PD-L1 and PD-L2 expressed on the T8 subset of cancer cells in the tumor |
| <b>Sigweight_T8b=CD80</b>  | 0.301818424 | dimensionless | Calculated as fraction of RO per total RO; see algebraic equations below | Weight of Effector T cell inhibition by signaling through CD80 receptors on Effector T cells that are occupied by PD-L1 expressed on the T8 subset of cancer cells in the tumor           |
| <b>Sigweight_T9=PDL1</b>   | 1           | dimensionless | Calculated as fraction of RO per                                         | Weight of Effector T cell inhibition by signaling through PD-L1 receptors on Effector T cells that                                                                                        |

| Variable                       | Value       | Units                      | Source                                                                   | Description                                                                                                                                                                                                                                                                                                                                                                                                                                                                                                                                                    |
|--------------------------------|-------------|----------------------------|--------------------------------------------------------------------------|----------------------------------------------------------------------------------------------------------------------------------------------------------------------------------------------------------------------------------------------------------------------------------------------------------------------------------------------------------------------------------------------------------------------------------------------------------------------------------------------------------------------------------------------------------------|
|                                |             |                            | total RO; see algebraic equations below                                  | are occupied by PD-1 and CD80 expressed on the T9 subset of cancer cells in the tumor                                                                                                                                                                                                                                                                                                                                                                                                                                                                          |
| <b>SigWeight_TrPNT=CD80</b>    | 0.266666667 | dimensionless              | Calculated as fraction of RO per total RO; see algebraic equations below | Weight of Primed Naive T cell inhibition by signaling through CD80 receptors on Primed Naive T cells that are involved in interacting with the PD-L1 receptors on Regulatory T cells during priming in the lymph nodes                                                                                                                                                                                                                                                                                                                                         |
| <b>SigWeight_TrPNT=Other</b>   | 0.2         | dimensionless              | Calculated as fraction of RO per total RO; see algebraic equations below | Weight of of inhibitory effects against Primed Naive T cells by other factors expressed by T Regulatory cells                                                                                                                                                                                                                                                                                                                                                                                                                                                  |
| <b>SigWeight_TrPNT=PD1</b>     | 0.266666667 | dimensionless              | Calculated as fraction of RO per total RO; see algebraic equations below | Weight of Primed Naive T cell inhibition by signaling through PD-1 receptors on Primed Naive T cells that are involved in interacting with the PD-L1 receptors on Regulatory T cells during priming in the lymph nodes                                                                                                                                                                                                                                                                                                                                         |
| <b>SigWeight_TrPNT=PDL1</b>    | 0.266666667 | dimensionless              | Calculated as fraction of RO per total RO; see algebraic equations below | Weight of Primed Naive T cell inhibition by signaling through PD-L1 receptors on Primed Naive T cells that are involved in interacting with the PD-1 receptors on Regulatory T cells during priming in the lymph nodes                                                                                                                                                                                                                                                                                                                                         |
| <b>Sigweight_TrTeff=CD80</b>   | 0.248844363 | dimensionless              | Calculated as fraction of RO per total RO; see algebraic equations below | Weight of Effector T cell inhibition by signaling through CD80 receptors expressed on Effector T cells that are interacting with PD-L1 on the T Regulatory cells in the tumor                                                                                                                                                                                                                                                                                                                                                                                  |
| <b>Sigweight_TrTeff=PD1</b>    | 0.54193964  | dimensionless              | Calculated as fraction of RO per total RO; see algebraic equations below | Weight of Effector T cell inhibition by signaling through PD-1 receptors expressed on Effector T cells that are interacting with PD-L1 on the T Regulatory cells in the tumor                                                                                                                                                                                                                                                                                                                                                                                  |
| <b>Sigweight_TrTeff=PDL1</b>   | 0.209215997 | dimensionless              | Calculated as fraction of RO per total RO; see algebraic equations below | Weight of Effector T cell inhibition by signaling through PD-L1 receptors expressed on Effector T cells that are interacting with PD-1 on the T Regulatory cells in the tumor                                                                                                                                                                                                                                                                                                                                                                                  |
| <b>Starting_Cancer_Diam_mm</b> | 15-80       | mm                         | Set value; varied                                                        | The diameter of the tumor at which to start its growth in the simulation                                                                                                                                                                                                                                                                                                                                                                                                                                                                                       |
| <b>Success_NT-mAPC</b>         | 500         | dimensionless              | [60, 62, 72, 79, 82, 83]                                                 | The number of Naive T:mAPC interactions that would occur prior to a successful priming interaction                                                                                                                                                                                                                                                                                                                                                                                                                                                             |
| <b>Success_PNT-mAPC</b>        | 50          | dimensionless              | [60, 62, 72, 79, 82, 84]                                                 | The number of Primed Naive T:mAPC interactions that would occur prior to a successful priming interaction. The difference between the number of successful interactions prior to priming between the first and second stage is estimated by enhanced immunity through chemokines that attract the CD8+ T cells where the APCs and T cells have gathered in a more localized area during priming [84].                                                                                                                                                          |
| <b>T_Cell_Clinality</b>        | 10-130      | cell                       | [28, 30, 85]                                                             | Number of Naive T cells populations specific for different tumor antigens; in other words; the number of anti-tumor T cell clones in each lymph node.                                                                                                                                                                                                                                                                                                                                                                                                          |
| <b>T_Cell_Diffusion</b>        | 10          | $\mu\text{m}^2/\text{min}$ | [62, 72, 79, 86]                                                         | The diffusion coefficient of Naive and Primed Naive T cells in the lymph nodes during priming                                                                                                                                                                                                                                                                                                                                                                                                                                                                  |
| <b>T_cells_per_mAPC</b>        | 75          | cell/cell                  | [19, 40, 71, 72, 87, 88]                                                 | The maximum number of Naive and Primed Naive T cells that can interact with an mAPC at once (surface area of APCs is $\sim 900\mu\text{m}^2$ as a sphere – from $\sim 2500\mu\text{m}^3$ [88] per APC – and APC:T contact area is $\sim 50\mu\text{m}^2$ [40], but have been shown to range from $1\mu\text{m}^2$ to $>70\mu\text{m}^2$ and even as much as 50% of a cell's surface area [19]). Note: all T cells were estimated to be the same size, and a surface area analysis was used for this estimation. Furthermore, the available surface area on the |

| Variable                     | Value       | Units                 | Source                                                             | Description                                                                                                                                                                                                                                                                                                                                                                                                         |
|------------------------------|-------------|-----------------------|--------------------------------------------------------------------|---------------------------------------------------------------------------------------------------------------------------------------------------------------------------------------------------------------------------------------------------------------------------------------------------------------------------------------------------------------------------------------------------------------------|
|                              |             |                       |                                                                    | mAPCs was multiplied by a factor of 3-4-fold [19] to consider dendritic projections, which would increase the surface area relative to the volume.                                                                                                                                                                                                                                                                  |
| <b>T_Density</b>             | Calculated  | cell/ $\mu\text{m}^3$ | [72]                                                               | The density of total T cells in the lymph nodes                                                                                                                                                                                                                                                                                                                                                                     |
| <b>T_IVinject</b>            | 1           | hour                  | Can be varied                                                      | Injection time of antibody                                                                                                                                                                                                                                                                                                                                                                                          |
| <b>T_per_Cancer_Cell_Int</b> | 1           | cell/cell             | Can be varied                                                      | The number of Effector T cells that interact with each cancer cell at once                                                                                                                                                                                                                                                                                                                                          |
| <b>T_per_Cancer_Cell_max</b> | 10          | cell/cell             | [71, 72]                                                           | The maximum number of Effector T cells that can interact with a cancer at once. Note: all T cells were estimated to be the same size, and a surface area analysis was used for this estimation.                                                                                                                                                                                                                     |
| <b>T_per_Tr_cell</b>         | 10          | cell/cell             | [71, 72, 89]                                                       | The maximum number of T (Naive, Primed Naive and Effector) cells that can interact with a T regulatory cell at once. Note: all T cells were estimated to be the same size, and a surface area analysis was used for this estimation.                                                                                                                                                                                |
| <b>TCytokineHoming</b>       | 100         | dimensionless         | [90, 91]; estimated with fitting to PD1 monotherapy tumor response | The factor specifying homing of Effector T cells to extravasate into the tumor more so than into the peripheral tissues, or to remain in the blood                                                                                                                                                                                                                                                                  |
| <b>TDLN_Radius</b>           | 6203.504909 | $\mu\text{m}$         | [72]                                                               | The radius of the lymph node region where T cell priming and interactions occur                                                                                                                                                                                                                                                                                                                                     |
| <b>TheEnd</b>                | 1           | dimensionless         | Assigned                                                           | Factor that is 0 or 1, which stops the immune response when the tumor has died, former, or allows the immune response to be active, latter                                                                                                                                                                                                                                                                          |
| <b>Time_Start_Therapy</b>    | Calculated  | day                   | Function of tumor diameter                                         | Recorded time when therapy began                                                                                                                                                                                                                                                                                                                                                                                    |
| <b>Time_Tumor_Death</b>      | Calculated  | day                   | Function of tumor diameter                                         | Recorded time when tumor was sufficiently killed by the immune response                                                                                                                                                                                                                                                                                                                                             |
| <b>T-mAPC_Cell_Size</b>      | 12          | $\mu\text{m}$         | [72]                                                               | The diameter of a T cell undergoing priming                                                                                                                                                                                                                                                                                                                                                                         |
| <b>T-mAPC_Inter_tmax_min</b> | 1440        | min                   | [72]                                                               | The maximum time (24 hours) over which interaction during each priming stage are considered.                                                                                                                                                                                                                                                                                                                        |
| <b>Total_T_per_TDLN</b>      | 5000000     | cell                  | [3]                                                                | The total number of T cells in each lymph node                                                                                                                                                                                                                                                                                                                                                                      |
| <b>Total_TC_Sig</b>          | Calculated  | dimensionless         | Sum of all cancer checkpoint signaling modules                     | The total immune checkpoint inhibiting effect on the Effector T cells by the tumor                                                                                                                                                                                                                                                                                                                                  |
| <b>Tr_cells_per_mAPC</b>     | 75          | cell/cell             | [19, 71, 72, 87, 88]                                               | The maximum number of T Regulatory cells that can interact with a mAPC cell at once. Note: all T cells were estimated to be the same size, and an approximate surface area analysis was used for this estimation. Furthermore, the available surface area on the mAPCs was multiplied by a factor of 3-4-fold [19] to consider dendritic projections, which would increase the surface area relative to the volume. |
| <b>Tr_per_T_cell</b>         | 10          | cell/cell             | [71, 72, 89]                                                       | The maximum number of T Regulatory cells that can interact with a T (Naive, Primed Naive and Effector) cell at once. Note: all T cells were estimated to be the same size, and a surface area analysis was used for this estimation.                                                                                                                                                                                |
| <b>Treg:mAPC_IntTime</b>     | 0.0924      | 1/minute              | [89]                                                               | Rate constant defining the half-life of interaction between T Regulatory cells or MDSCs and mAPCs                                                                                                                                                                                                                                                                                                                   |
| <b>Treg:T_IntTime</b>        | 0.1386      | 1/minute              | [89]                                                               | Rate constant defining the half-life of interaction between T Regulatory cells or MDSCs and T (Naive, Primed Naive and Effector) cells                                                                                                                                                                                                                                                                              |
| <b>TregLN_Engage</b>         | 0.05775     | 1/(mole*hour)         | [59-61]; assumed the same                                          | Rate constant defining the half-life of engagement between T Regulatory cells and mAPCs or T (Naive, Primed Naive and Effector) cells                                                                                                                                                                                                                                                                               |
| <b>TregTMDSCEng</b>          | 0.2079      | 1/hour                | Assumed 0.1 of Effect:Target engagement time                       | Rate constant defining the half-life of engagement between mAPCs or Effector T cells, and T Regulatory cells or MDSCs in the tumor                                                                                                                                                                                                                                                                                  |
| <b>TrLN-mAPC_Cell_Size</b>   | 12          | $\mu\text{m}$         | [72, 89]                                                           | The diameter of a T Regulatory cell interacting with mAPCs                                                                                                                                                                                                                                                                                                                                                          |
| <b>TrLN-PNT_Cell_Size</b>    | 12          | $\mu\text{m}$         | [72, 89]                                                           | The diameter of a T Regulatory cell interacting with Primed Naive T cells                                                                                                                                                                                                                                                                                                                                           |
| <b>Total_Tumor_Void_Frac</b> | 0.57        | dimensionless         | [13, 16]                                                           | The fraction of tumor volume that is not occupied by cancer cells, consider vasculature                                                                                                                                                                                                                                                                                                                             |

| Variable                         | Value       | Units         | Source                                                           | Description                                                                                                                |
|----------------------------------|-------------|---------------|------------------------------------------------------------------|----------------------------------------------------------------------------------------------------------------------------|
| <b>Tumor_Void_Fraction</b>       | 0.5         | dimensionless | [16]                                                             | The fraction of tumor volume that is not occupied by cancer cells, not consider vasculature                                |
| <b>Tumor_Vol_Ellipse_c_ratio</b> | 0.5         | dimensionless | [92]                                                             | The approximate shortest radius of the ellipsoid tumor                                                                     |
| <b>V_T:C_10</b>                  | Calculated  | liter         | Calculated (cell SA times synapse diameter); see equations below | Volume of receptor interactions between Effector T cells and cancer cells in the T10 subgroup at the immunological synapse |
| <b>V_T:C_11</b>                  | Calculated  | liter         | Calculated (cell SA times synapse diameter); see equations below | Volume of receptor interactions between Effector T cells and cancer cells in the T11 subgroup at the immunological synapse |
| <b>V_T:C_12</b>                  | Calculated  | liter         | Calculated (cell SA times synapse diameter); see equations below | Volume of receptor interactions between Effector T cells and cancer cells in the T12 subgroup at the immunological synapse |
| <b>V_T:C_13</b>                  | Calculated  | liter         | Calculated (cell SA times synapse diameter); see equations below | Volume of receptor interactions between Effector T cells and cancer cells in the T13 subgroup at the immunological synapse |
| <b>V_T:C_14</b>                  | Calculated  | liter         | Calculated (cell SA times synapse diameter); see equations below | Volume of receptor interactions between Effector T cells and cancer cells in the T14 subgroup at the immunological synapse |
| <b>V_T:C_15</b>                  | Calculated  | liter         | Calculated (cell SA times synapse diameter); see equations below | Volume of receptor interactions between Effector T cells and cancer cells in the T15 subgroup at the immunological synapse |
| <b>V_T:C_16</b>                  | Calculated  | liter         | Calculated (cell SA times synapse diameter); see equations below | Volume of receptor interactions between Effector T cells and cancer cells in the T16 subgroup at the immunological synapse |
| <b>V_T:C_2</b>                   | Calculated  | liter         | Calculated (cell SA times synapse diameter); see equations below | Volume of receptor interactions between Effector T cells and cancer cells in the T2 subgroup at the immunological synapse  |
| <b>V_T:C_3</b>                   | Calculated  | liter         | Calculated (cell SA times synapse diameter); see equations below | Volume of receptor interactions between Effector T cells and cancer cells in the T3 subgroup at the immunological synapse  |
| <b>V_T:C_4</b>                   | Calculated  | liter         | Calculated (cell SA times synapse diameter); see equations below | Volume of receptor interactions between Effector T cells and cancer cells in the T4 subgroup at the immunological synapse  |
| <b>V_T:C_5</b>                   | Calculated  | liter         | Calculated (cell SA times synapse diameter); see equations below | Volume of receptor interactions between Effector T cells and cancer cells in the T5 subgroup at the immunological synapse  |
| <b>V_T:C_6</b>                   | Calculated  | liter         | Calculated (cell SA times synapse diameter); see equations below | Volume of receptor interactions between Effector T cells and cancer cells in the T6 subgroup at the immunological synapse  |
| <b>V_T:C_7</b>                   | Calculated  | liter         | Calculated (cell SA times synapse diameter); see equations below | Volume of receptor interactions between Effector T cells and cancer cells in the T7 subgroup at the immunological synapse  |
| <b>V_T:C_8</b>                   | Calculated  | liter         | Calculated (cell SA times synapse diameter); see equations below | Volume of receptor interactions between Effector T cells and cancer cells in the T8 subgroup at the immunological synapse  |
| <b>V_T:C_9</b>                   | Calculated  | liter         | Calculated (cell SA times synapse diameter); see equations below | Volume of receptor interactions between Effector T cells and cancer cells in the T9 subgroup at the immunological synapse  |
| <b>Vc_CTLA4</b>                  | 2.727814034 | liter         | [15]                                                             | Volume of the central compartment for Anti-CTLA-4                                                                          |
| <b>Vc_PD1</b>                    | 2.716739643 | liter         | [25]                                                             | Volume of the central compartment for Anti-PD-1                                                                            |

| Variable                | Value                                   | Units  | Source                                                           | Description                                                                                                                             |
|-------------------------|-----------------------------------------|--------|------------------------------------------------------------------|-----------------------------------------------------------------------------------------------------------------------------------------|
| Vc_PDL1                 | 4.051599814                             | liter  | [26, 27]                                                         | Volume of the central compartment for Anti-PD-L1                                                                                        |
| Vc_Teff                 | 2.7                                     | liter  | [13, 93]                                                         | Volume of blood through which Effector T cells circulate throughout the body                                                            |
| Vex_Tmr                 | ~50% (void space) of total tumor volume | ml     | [13] Calculated dynamically                                      | Volume of Tumor interstitium                                                                                                            |
| Vext_Liver              | 361.8                                   | ml     | [13]                                                             | Volume of Liver interstitium                                                                                                            |
| Vext_LN                 | 34.7                                    | ml     | [13]                                                             | Volume of Lymph Node interstitium                                                                                                       |
| Vext_Lungs              | 299.7                                   | ml     | [13]                                                             | Volume of Lungs interstitium                                                                                                            |
| Vext_Spleen             | 34.7                                    | ml     | [13]                                                             | Volume of Spleen interstitium                                                                                                           |
| VL                      | 5.2                                     | liter  | [56]                                                             | Volume of Lymph                                                                                                                         |
| Vm                      | 0.824                                   | mg/day | [63]                                                             | Vmax for ADA saturation for Durvalumab                                                                                                  |
| Vol_Cell-Rec_MDSC-TeffT | Calculated                              | liter  | Calculated (cell SA times synapse diameter); see equations below | Volume of receptor interactions between Effector T cells and MDSCs at the immunological synapse in the tumor                            |
| Vol_Cell-Rec_Tr-APCT    | Calculated                              | liter  | Calculated (cell SA times synapse diameter); see equations below | Volume of receptor interactions between mAPCs and T Regulatory cells at the immunological synapse in the tumor                          |
| Vol_Cell-Rec_Tr-mAPC    | Calculated                              | liter  | Calculated (cell SA times synapse diameter); see equations below | Volume of receptor interactions between mAPCs and T Regulatory cells at the immunological synapse in the lymph nodes                    |
| Vol_Cell-Rec_Tr-PNT     | Calculated                              | liter  | Calculated (cell SA times synapse diameter); see equations below | Volume of receptor interactions between Primed Naive T cells and T Regulatory cells at the immunological synapse in the lymph nodes     |
| Vol_Cell-Rec_Tr-TeffT   | Calculated                              | liter  | Calculated (cell SA times synapse diameter); see equations below | Volume of receptor interactions between Effector T cells and T Regulatory cells at the immunological synapse in the tumor               |
| Vol_per_TDLN            | 1                                       | ml     | [94]                                                             | Volume of a single human lymph node (represented as a sphere) where the T cells reside and undergo priming for probability calculations |
| Volume_NT-Receptor_Int  | Calculated                              | liter  | Calculated (cell SA times synapse diameter); see equations below | Volume of receptor interactions between Naive T cells and mAPCs at the immunological synapse in the lymph nodes during priming          |
| Volume_PNT-Receptor_Int | Calculated                              | liter  | Calculated (cell SA times synapse diameter); see equations below | Volume of receptor interactions between Primed Naive T cells and mAPCs at the immunological synapse in the lymph nodes during priming   |
| Vt                      | 0.01                                    | liter  | Estimated                                                        | Volume of the tumor compartment for PK calculations                                                                                     |
| Vt_avg_const            | 33.5                                    | cm^3   | [68]                                                             | Average tumor volume considered diffusive transport                                                                                     |
| Vtdln                   | 5.2                                     | liter  | [56, 94]                                                         | Volume of total lymph                                                                                                                   |
| Vt_Teff                 | Based on Cancer_Vol_cm3                 | liter  | Calculated dynamically                                           | Total tumor volume based on cancer cell number, void space and tumor vasculature                                                        |
| Vv_GI                   | 43                                      | ml     | [13]                                                             | Vasculature volume of GI                                                                                                                |
| Vv_Liver                | 180.9                                   | ml     | [13]                                                             | Vasculature volume of Liver                                                                                                             |
| Vv_LN                   | 17                                      | ml     | [13]                                                             | Vasculature volume of Lymph Node                                                                                                        |
| Vv_Lungs                | 99.9                                    | ml     | [13]                                                             | Vasculature volume of Lungs                                                                                                             |
| Vv_Periph               | 1355.4                                  | ml     | [13]                                                             | Vasculature volume of Peripheral for Effector T cell trafficking                                                                        |
| Vv_Spleen               | 17                                      | ml     | [13]                                                             | Vasculature volume of Spleen                                                                                                            |
| Vv_Tmr                  | ~7% of total tumor volume               | ml     | [13] Calculated dynamically                                      | Vasculature volume of Tumor based on fraction of total tumor volume                                                                     |

Table S5 – Model Parameters (End)

Table S6 – Model Algebraic Equations (Start)

| Parameter and Species Assignment Equation                                                                                                                                                                                           | Assignment Type |
|-------------------------------------------------------------------------------------------------------------------------------------------------------------------------------------------------------------------------------------|-----------------|
| $[\% \{CD80\} \{PD1\} C] = \text{Frac\_PD1\_Exp\_Cancer} * \text{Frac\_CD80\_Exp\_Cancer} * (1 - \text{Frac\_PDL2\_Exp\_Cancer}) * (1 - \text{Frac\_PDL1\_Exp\_Cancer})$                                                            | Repeated        |
| $[\% \{CD80\} C] = \text{Frac\_CD80\_Exp\_Cancer} * (1 - \text{Frac\_PDL1\_Exp\_Cancer}) * (1 - \text{Frac\_PDL2\_Exp\_Cancer}) * (1 - \text{Frac\_PD1\_Exp\_Cancer})$                                                              | Repeated        |
| $[\% \{Other\} C] = (1 - \text{Frac\_PDL1\_Exp\_Cancer}) * (1 - \text{Frac\_CD80\_Exp\_Cancer}) * (1 - \text{Frac\_PDL2\_Exp\_Cancer}) * (1 - \text{Frac\_PD1\_Exp\_Cancer})$                                                       | Repeated        |
| $[\% \{PD1\} \{80\} \{L1\} \{L2\} C] = \text{Frac\_PDL1\_Exp\_Cancer} * \text{Frac\_CD80\_Exp\_Cancer} * \text{Frac\_PDL2\_Exp\_Cancer} * \text{Frac\_PD1\_Exp\_Cancer}$                                                            | Repeated        |
| $[\% \{PD1\} \{80\} \{L1\} C] = \text{Frac\_PD1\_Exp\_Cancer} * \text{Frac\_CD80\_Exp\_Cancer} * \text{Frac\_PDL1\_Exp\_Cancer} * (1 - \text{Frac\_PDL2\_Exp\_Cancer})$                                                             | Repeated        |
| $[\% \{PD1\} \{80\} \{PDL2\} C] = \text{Frac\_PD1\_Exp\_Cancer} * \text{Frac\_CD80\_Exp\_Cancer} * \text{Frac\_PDL2\_Exp\_Cancer} * (1 - \text{Frac\_PDL1\_Exp\_Cancer})$                                                           | Repeated        |
| $[\% \{PD1\} \{L1\} \{L2\} C] = \text{Frac\_PD1\_Exp\_Cancer} * \text{Frac\_PDL1\_Exp\_Cancer} * \text{Frac\_PDL2\_Exp\_Cancer} * (1 - \text{Frac\_CD80\_Exp\_Cancer})$                                                             | Repeated        |
| $[\% \{PD1\} \{L1\} C] = \text{Frac\_PD1\_Exp\_Cancer} * \text{Frac\_PDL1\_Exp\_Cancer} * (1 - \text{Frac\_PDL2\_Exp\_Cancer}) * (1 - \text{Frac\_CD80\_Exp\_Cancer})$                                                              | Repeated        |
| $[\% \{PD1\} \{L2\} C] = \text{Frac\_PD1\_Exp\_Cancer} * \text{Frac\_PDL2\_Exp\_Cancer} * (1 - \text{Frac\_PDL1\_Exp\_Cancer}) * (1 - \text{Frac\_CD80\_Exp\_Cancer})$                                                              | Repeated        |
| $[\% \{PD1\} C] = \text{Frac\_PD1\_Exp\_Cancer} * (1 - \text{Frac\_PDL1\_Exp\_Cancer}) * (1 - \text{Frac\_PDL2\_Exp\_Cancer}) * (1 - \text{Frac\_CD80\_Exp\_Cancer})$                                                               | Repeated        |
| $[\% \{PDL1\} \{80\} \{L2\} C] = \text{Frac\_PDL1\_Exp\_Cancer} * \text{Frac\_CD80\_Exp\_Cancer} * \text{Frac\_PDL2\_Exp\_Cancer} * (1 - \text{Frac\_PD1\_Exp\_Cancer})$                                                            | Repeated        |
| $[\% \{PDL1\} \{80\} C] = \text{Frac\_CD80\_Exp\_Cancer} * \text{Frac\_PDL1\_Exp\_Cancer} * (1 - \text{Frac\_PDL2\_Exp\_Cancer}) * (1 - \text{Frac\_PD1\_Exp\_Cancer})$                                                             | Repeated        |
| $[\% \{PDL1\} \{PDL2\} C] = \text{Frac\_PDL1\_Exp\_Cancer} * \text{Frac\_PDL2\_Exp\_Cancer} * (1 - \text{Frac\_PD1\_Exp\_Cancer}) * (1 - \text{Frac\_CD80\_Exp\_Cancer})$                                                           | Repeated        |
| $[\% \{PDL1\} C] = \text{Frac\_PDL1\_Exp\_Cancer} * (1 - \text{Frac\_PD1\_Exp\_Cancer}) * (1 - \text{Frac\_PDL2\_Exp\_Cancer}) * (1 - \text{Frac\_CD80\_Exp\_Cancer})$                                                              | Repeated        |
| $[\% \{PDL2\} \{80\} C] = \text{Frac\_CD80\_Exp\_Cancer} * \text{Frac\_PDL2\_Exp\_Cancer} * (1 - \text{Frac\_PDL1\_Exp\_Cancer}) * (1 - \text{Frac\_PD1\_Exp\_Cancer})$                                                             | Repeated        |
| $[\% \{PDL2\} C] = \text{Frac\_PDL2\_Exp\_Cancer} * (1 - \text{Frac\_PDL1\_Exp\_Cancer}) * (1 - \text{Frac\_PD1\_Exp\_Cancer}) * (1 - \text{Frac\_CD80\_Exp\_Cancer})$                                                              | Repeated        |
| $[\text{Blood-Lymph}].\text{CTLA4\_mabB\_ugml} = ([\text{Blood-Lymph}].\text{CTLA4\_mabB} * [\text{Ipilimumab\_MW}]) / (\text{Vc\_CTLA4})$                                                                                          | Repeated        |
| $[\text{Blood-Lymph}].\text{Effector\_T\_Blood\_Con} = \text{Effector\_TB} / (\text{Vc\_Teff} * 5/2/7)$                                                                                                                             | Repeated        |
| $[\text{Blood-Lymph}].\text{Effector\_T\_TB} = \text{Effector\_T} * [\text{Num\_TDLN\_Considered}]$                                                                                                                                 | Repeated        |
| $[\text{Blood-Lymph}].\text{Effector\_T\_TOTAL} = \text{EffT\_P\_f\_Vasc} + \text{Effector\_TT\_Count} + \text{Effector\_TB}$                                                                                                       | Repeated        |
| $[\text{Blood-Lymph}].\text{PD1\_mabB\_ugml} = ([\text{Blood-Lymph}].\text{PD1\_mabB} * [\text{Nivolumab\_MW}]) / \text{Vc\_PD1}$                                                                                                   | Repeated        |
| $[\text{Blood-Lymph}].\text{PDL1\_mabB\_ugml} = ([\text{Blood-Lymph}].\text{PDL1\_mabB} * [\text{Durvalumab\_MW}]) / \text{Vc\_PDL1}$                                                                                               | Repeated        |
| $[\text{CD28\_POS-Sig\_NT}] = (\text{POS\_Sig\_NT\_CD80} + \text{POS\_Sig\_NT\_CD86}) / (\text{POS\_Sig\_NT\_CD80} + \text{POS\_Sig\_NT\_CD86} + \text{NT\_Int\_CD28} + 1\text{E-}100 * \text{mole})$                               | Repeated        |
| $[\text{CD28\_POS-to-Total}] = (\text{POS\_Sig\_PNT\_CD80} + \text{POS\_Sig\_PNT\_CD86}) / (\text{POS\_Sig\_PNT\_CD80} + \text{POS\_Sig\_PNT\_CD86} + \text{PNT\_Int\_CD28} + 1\text{E-}100 * \text{mole})$                         | Repeated        |
| $[\text{CD80\_PNT\_NEG-to-Max}] = [\text{PNT\_CD80-PDL1}] / ([\text{PNT\_Int\_CD80}] + [\text{PNT\_CD80-PDL1}] + 1\text{E-}100 * \text{mole})$                                                                                      | Repeated        |
| $[\text{CD80\_receptors-per-mAPC}] = 130000 * \text{mAPC\_activation\_level}$                                                                                                                                                       | Repeated        |
| $[\text{CD80Sig\_Tr-PNT}] = [\text{TrPNT\_PDL1-CD80}] / ([\text{TrPNT\_PDL1-CD80}] + [\text{PNT-Tr\_CD80}] + 1\text{E-}100 * \text{mole})$                                                                                          | Repeated        |
| $[\text{CD86\_receptors-per-mAPC}] = 208000 * \text{mAPC\_activation\_level}$                                                                                                                                                       | Repeated        |
| $[\text{CTLA4\_NEG-to-Total}] = (\text{NEG\_Sig\_PNT\_CD80} + \text{NEG\_Sig\_PNT\_CD86}) / (\text{NEG\_Sig\_PNT\_CD80} + \text{NEG\_Sig\_PNT\_CD86} + \text{PNT\_CTLA4} + \text{CTLA4\_mAb\_CTLA4} + 1\text{E-}100 * \text{mole})$ | Repeated        |
| $[\text{CTLA4\_receptors-Int-PNT}] = [\text{CD28\_receptors-per-Tcell}] * [\text{CTLA4-to-CD28\_Ratio\_Int}]$                                                                                                                       | Repeated        |
| $[\text{CTLA4\_receptors-nInt-PNT}] = [\text{CD28\_receptors-per-Tcell}] * [\text{CTLA4-to-CD28\_Ratio\_nInt}]$                                                                                                                     | Repeated        |
| $[\text{CTLA4\_receptors-Tr}] = [\text{CD28\_receptors-per-Tcell}] * [\text{CTLA4-to-CD28\_Ratio\_Tr}]$                                                                                                                             | Repeated        |
| $[\text{CTLA4Sig\_TrLN-mAPC}] = ([\text{TrALN\_CT\_aCT}] / ([\text{TrALN\_CT\_CD80}] + [\text{TrALN\_CT\_CD86}] + [\text{Tr-mAPC\_CTLA4}] + [\text{TrALN\_CT\_aCT}] + 1\text{E-}100 * \text{mole}))$                                | Repeated        |
| $[\text{CTLA4-to-CD28\_Ratio\_Int}] = 0.035 * (1 + \text{Antigen\_Intensity} * 2)$                                                                                                                                                  | Repeated        |
| $[\text{CTLA4-to-CD28\_Ratio\_nInt}] = 0.035$                                                                                                                                                                                       | Repeated        |
| $[\text{Max\_\#Cells\_per\_mm}^3] = 1 / [\text{Cancer\_Cell\_Vol\_mm}^3]$                                                                                                                                                           | Initial         |
| $[\text{PD1\_PNT\_NEG-to-Max}] = ([\text{PNT\_PD1-PDL2}] + [\text{PNT\_PD1-PDL1}]) / ([\text{PNT\_Int\_PD1}] + [\text{PNT\_PD1-PDL2}] + [\text{PNT\_PD1-PDL1}] + [\text{PD1mAb\_PNT\_PD1}] + 1\text{E-}100 * \text{mole})$          | Repeated        |
| $[\text{PD1Sig\_Tr-PNT}] = ([\text{TrPNT\_PDL1-PD1}]) / ([\text{TrPNT\_PDL1-PD1}] + [\text{PNT-Tr\_PD1}] + [\text{PNTTr\_PD1\_aPD1}] + 1\text{E-}100 * \text{mole})$                                                                | Repeated        |
| $[\text{PDL1\_PNT\_NEG-to-Max}] = ([\text{PNT\_PDL1-CD80}] + [\text{PNT\_PDL1-PD1}]) / ([\text{PNT\_Int\_PDL1}] + [\text{PNT\_PDL1-CD80}] + [\text{PNT\_PDL1-PD1}] + [\text{PDL1mAb-PNT\_PDL1}] + 1\text{E-}100 * \text{mole})$     | Repeated        |
| $[\text{PDL1Sig\_Tr-PNT}] = ([\text{TrPNT\_PDL1-L1}]) / ([\text{TrPNT\_PDL1-L1}] + [\text{PNT-Tr\_PDL1}] + [\text{PNTTr\_PDL1\_aPDL1}] + 1\text{E-}100 * \text{mole})$                                                              | Repeated        |

| Parameter and Species Assignment Equation                                                                                                                                                                                                                                                                                                                                                                                                                                                                                                                                                                                                                | Assignment Type |
|----------------------------------------------------------------------------------------------------------------------------------------------------------------------------------------------------------------------------------------------------------------------------------------------------------------------------------------------------------------------------------------------------------------------------------------------------------------------------------------------------------------------------------------------------------------------------------------------------------------------------------------------------------|-----------------|
| $[Prob\_NT-mAPC\_Interact] = (1 - \exp(-4 * \pi * [T-mAPC\_Cell\_Size] * T\_Cell\_Diffusion * mAPC\_Total\_Calc\_Pr * Precursor\_Frequen\_NT * T\_Density * [T-mAPC\_Inter\_tmax\_min] * Antigen\_Intensity) / (T\_Cell\_Clonality * [Success\_NT-mAPC]))$                                                                                                                                                                                                                                                                                                                                                                                               | Repeated        |
| $[Prob\_PNT-mAPC\_Interact] = (1 - \exp(-4 * \pi * [T-mAPC\_Cell\_Size] * T\_Cell\_Diffusion * mAPC\_Total\_Calc\_Pr * Precursor\_Frequen\_PNT * T\_Density * [T-mAPC\_Inter\_tmax\_min] * Antigen\_Intensity) / (T\_Cell\_Clonality * [Success\_PNT-mAPC]))$                                                                                                                                                                                                                                                                                                                                                                                            | Repeated        |
| $[Sig\_MDSCTeff=CD80] = ([PDL1:CD80\_MDSCT]) / ([PDL1:CD80\_MDSCT] + [CD80\_TeffT1] + 1E-100 * mole)$                                                                                                                                                                                                                                                                                                                                                                                                                                                                                                                                                    | Repeated        |
| $[Sig\_MDSCTeff=PD1] = ([PDL1:PD1\_MDSCT]) / ([PDL1:PD1\_MDSCT] + [PD1\_TeffT1] + [PD1:aPD1\_Teff1] + 1E-100 * mole)$                                                                                                                                                                                                                                                                                                                                                                                                                                                                                                                                    | Repeated        |
| $[Sig\_MDSCTeff=PDL1] = ([PDL1:PDL1\_MDSCT]) / ([PDL1:PDL1\_MDSCT] + [PDL1\_TeffT1] + [PDL1:aPDL1\_Teff1] + 1E-100 * mole)$                                                                                                                                                                                                                                                                                                                                                                                                                                                                                                                              | Repeated        |
| $[Sig\_MDSCTeff=Total] = (([Sigweight\_MDSCTeff=CD80] * ([Sig\_MDSCTeff=CD80] / [Sigmax\_MDSCTeff=CD80]) + [Sigweight\_MDSCTeff=PD1] * ([Sig\_MDSCTeff=PD1] / [Sigmax\_MDSCTeff=PD1]) + [Sigweight\_MDSCTeff=PDL1] * ([Sig\_MDSCTeff=PDL1] / [Sigmax\_MDSCTeff=PDL1])) ^ \gamma_{Sig1} / (1 + ([Sigweight\_MDSCTeff=CD80] * ([Sig\_MDSCTeff=CD80] / [Sigmax\_MDSCTeff=CD80]) + [Sigweight\_MDSCTeff=PD1] * ([Sig\_MDSCTeff=PD1] / [Sigmax\_MDSCTeff=PD1]) + [Sigweight\_MDSCTeff=PDL1] * ([Sig\_MDSCTeff=PDL1] / [Sigmax\_MDSCTeff=PDL1])) ^ \gamma_{Sig1}) * (1 - [Sig\_MDSCTeff = Other]) + [Sig\_MDSCTeff = Other]$                                   | Repeated        |
| $[Sig\_NT=CD28] = ([CD28\_POS-Sig\_NT] / [Sigmax\_NT=CD28])$                                                                                                                                                                                                                                                                                                                                                                                                                                                                                                                                                                                             | Repeated        |
| $[Sig\_PNT=CTLA4/PD1/L1/CD80] = ([SigWeight\_PNT=CTLA4] * [CTLA4\_NEG-to-Total] / [Sigmax\_PNT=CTLA4] + [SigWeight\_PNT=PD1] * [PD1\_PNT\_NEG-to-Max] / [Sigmax\_PNT=PD1] + [SigWeight\_PNT=PDL1] * [PDL1\_PNT\_NEG-to-Max] / [Sigmax\_PNT=PDL1] + [SigWeight\_PNT=CD80] * [CD80\_PNT\_NEG-to-Max] / [Sigmax\_PNT=CD80]) ^ \gamma_{Sig} / (1 + ([SigWeight\_PNT=CTLA4] * [CTLA4\_NEG-to-Total] / [Sigmax\_PNT=CTLA4] + [SigWeight\_PNT=PD1] * [PD1\_PNT\_NEG-to-Max] / [Sigmax\_PNT=PD1] + [SigWeight\_PNT=PDL1] * [PDL1\_PNT\_NEG-to-Max] / [Sigmax\_PNT=PDL1] + [SigWeight\_PNT=CD80] * [CD80\_PNT\_NEG-to-Max] / [Sigmax\_PNT=CD80]) ^ \gamma_{Sig})$ | Repeated        |
| $[Sig\_T1=Total] = 1$                                                                                                                                                                                                                                                                                                                                                                                                                                                                                                                                                                                                                                    | Repeated        |
| $[Sig\_T10=Total] = (([Sigweight\_T10a=PDL1] * [Sig\_T10a=PDL1] / [Sigmax\_T10a=PDL1] + [Sigweight\_T10b=PD1] * [Sig\_T10b=PD1] / [Sigmax\_T10b=PD1] + [Sigweight\_T10c=CD80] * [Sig\_T10c=CD80] / [Sigmax\_T10c=CD80]) ^ \gamma_{Sig1} / (1 + ([Sigweight\_T10a=PDL1] * [Sig\_T10a=PDL1] / [Sigmax\_T10a=PDL1] + [Sigweight\_T10b=PD1] * [Sig\_T10b=PD1] / [Sigmax\_T10b=PD1] + [Sigweight\_T10c=CD80] * [Sig\_T10c=CD80] / [Sigmax\_T10c=CD80]) ^ \gamma_{Sig1}) * (1 - [Sig\_T=Other]) + [Sig\_T=Other]$                                                                                                                                              | Repeated        |
| $[Sig\_T10a=PDL1] = ([T10a=PDL1:PD1=C10a]) / ([T10a=PDL1:PD1=C10a] + [T10a=PDL1] + [T10a=PDL1:aPDL1] + 1E-100 * mole)$                                                                                                                                                                                                                                                                                                                                                                                                                                                                                                                                   | Repeated        |
| $[Sig\_T10b=PD1] = ([T10b=PD1:PDL1=C10b] + [T10b=PD1:PDL2=C10c]) / ([T10b=PD1:PDL1=C10b] + [T10b=PD1:PDL2=C10c] + [T10b=PD1] + [T10b=PD1:aPD1] + 1E-100 * mole)$                                                                                                                                                                                                                                                                                                                                                                                                                                                                                         | Repeated        |
| $[Sig\_T10c=CD80] = ([T10c=CD80:PDL1=C10b]) / ([T10c=CD80:PDL1=C10b] + [T10c=CD80] + 1E-100 * mole)$                                                                                                                                                                                                                                                                                                                                                                                                                                                                                                                                                     | Repeated        |
| $[Sig\_T11=Total] = (([Sigweight\_T11a=PDL1] * [Sig\_T11a=PDL1] / [Sigmax\_T11a=PDL1] + [Sigweight\_T11b=PD1] * [Sig\_T11b=PD1] / [Sigmax\_T11b=PD1]) ^ \gamma_{Sig1} / (1 + ([Sigweight\_T11a=PDL1] * [Sig\_T11a=PDL1] / [Sigmax\_T11a=PDL1] + [Sigweight\_T11b=PD1] * [Sig\_T11b=PD1] / [Sigmax\_T11b=PD1]) ^ \gamma_{Sig1}) * (1 - [Sig\_T=Other]) + [Sig\_T=Other]$                                                                                                                                                                                                                                                                                  | Repeated        |
| $[Sig\_T11a=PDL1] = ([T11a=PDL1:CD80=C11b]) / ([T11a=PDL1:CD80=C11b] + [T11a=PDL1] + [T11a=PDL1:aPDL1] + 1E-100 * mole)$                                                                                                                                                                                                                                                                                                                                                                                                                                                                                                                                 | Repeated        |
| $[Sig\_T11b=PD1] = ([T11b=PD1:PDL1=C11a]) / ([T11b=PD1:PDL1=C11a] + [T11b=PD1] + [T11b=PD1:aPD1] + 1E-100 * mole)$                                                                                                                                                                                                                                                                                                                                                                                                                                                                                                                                       | Repeated        |
| $[Sig\_T12=Total] = (([Sigweight\_T12a=PDL1] * [Sig\_T12a=PDL1] / [Sigmax\_T12a=PDL1] + [Sigweight\_T12b=PD1] * [Sig\_T12b=PD1] / [Sigmax\_T12b=PD1]) ^ \gamma_{Sig1} / (1 + ([Sigweight\_T12a=PDL1] * [Sig\_T12a=PDL1] / [Sigmax\_T12a=PDL1] + [Sigweight\_T12b=PD1] * [Sig\_T12b=PD1] / [Sigmax\_T12b=PD1]) ^ \gamma_{Sig1}) * (1 - [Sig\_T=Other]) + [Sig\_T=Other]$                                                                                                                                                                                                                                                                                  | Repeated        |
| $[Sig\_T12a=PDL1] = ([T12a=PDL1:CD80=C12b]) / ([T12a=PDL1:CD80=C12b] + [T12a=PDL1] + [T12a=PDL1:aPDL1] + 1E-100 * mole)$                                                                                                                                                                                                                                                                                                                                                                                                                                                                                                                                 | Repeated        |
| $[Sig\_T12b=PD1] = ([T12b=PD1:PDL2=C12a]) / ([T12b=PD1:PDL2=C12a] + [T12b=PD1] + [T12b=PD1:aPD1] + 1E-100 * mole)$                                                                                                                                                                                                                                                                                                                                                                                                                                                                                                                                       | Repeated        |
| $[Sig\_T13=Total] = (([Sigweight\_T13a=PDL1] * [Sig\_T13a=PDL1] / [Sigmax\_T13a=PDL1] + [Sigweight\_T13b=PD1] * [Sig\_T13b=PD1] / [Sigmax\_T13b=PD1]) ^ \gamma_{Sig1} / (1 + ([Sigweight\_T13a=PDL1] * [Sig\_T13a=PDL1] / [Sigmax\_T13a=PDL1] + [Sigweight\_T13b=PD1] * [Sig\_T13b=PD1] / [Sigmax\_T13b=PD1]) ^ \gamma_{Sig1}) * (1 - [Sig\_T=Other]) + [Sig\_T=Other]$                                                                                                                                                                                                                                                                                  | Repeated        |
| $[Sig\_T13a=PDL1] = ([T13a=PDL1:CD80=C13c]) / ([T13a=PDL1:CD80=C13c] + [T13a=PDL1] + [T13a=PDL1:aPDL1] + 1E-100 * mole)$                                                                                                                                                                                                                                                                                                                                                                                                                                                                                                                                 | Repeated        |
| $[Sig\_T13b=PD1] = ([T13b=PD1:PDL2=C13b] + [T13b=PD1:PDL1=C13a]) / ([T13b=PD1:PDL2=C13b] + [T13b=PD1:PDL1=C13a] + [T13b=PD1] + [T13b=PD1:aPD1] + 1E-100 * mole)$                                                                                                                                                                                                                                                                                                                                                                                                                                                                                         | Repeated        |
| $[Sig\_T14=Total] = (([Sigweight\_T14a=PDL1] * [Sig\_T14a=PDL1] / [Sigmax\_T14a=PDL1] + [Sigweight\_T14b=PD1] * [Sig\_T14b=PD1] / [Sigmax\_T14b=PD1] + [Sigweight\_T14c=CD80] * [Sig\_T14c=CD80] / [Sigmax\_T14c=CD80]) ^ \gamma_{Sig1} / (1 + ([Sigweight\_T14a=PDL1] * [Sig\_T14a=PDL1] / [Sigmax\_T14a=PDL1] + [Sigweight\_T14b=PD1] * [Sig\_T14b=PD1] / [Sigmax\_T14b=PD1] + [Sigweight\_T14c=CD80] * [Sig\_T14c=CD80] / [Sigmax\_T14c=CD80]) ^ \gamma_{Sig1}) * (1 - [Sig\_T=Other]) + [Sig\_T=Other]$                                                                                                                                              | Repeated        |



| Parameter and Species Assignment Equation                                                                                                                                                                                                                                                                                                                                                                                                                                                                                                                                | Assignment Type |
|--------------------------------------------------------------------------------------------------------------------------------------------------------------------------------------------------------------------------------------------------------------------------------------------------------------------------------------------------------------------------------------------------------------------------------------------------------------------------------------------------------------------------------------------------------------------------|-----------------|
| $\frac{[\text{Sigweight\_T14a=PDL1}] * [\text{Sig\_T14a=PDL1}]}{[\text{Sigmax\_T14a=PDL1}] + [\text{Sigweight\_T14b=PD1}] * [\text{Sig\_T14b=PD1}]} + \frac{[\text{Sigweight\_T14c=CD80}] * [\text{Sig\_T14c=CD80}]}{[\text{Sigmax\_T14c=CD80}]^{\text{gamma\_Sig1}}} * (1 - [\text{Sig\_T=Other}]) + [\text{Sig\_T=Other}]$ $[\text{Sig\_T14a=PDL1}] = \frac{([\text{T14a=PDL1:PD1=C14a}] + [\text{T14a=PDL1:CD80=C14c}])}{([\text{T14a=PDL1:PD1=C14a}] + [\text{T14a=PDL1:CD80=C14c}] + [\text{T14a=PDL1}] + [\text{T14a=PDL1:aPDL1}] + 1\text{E-}100 * \text{mole})}$ | Repeated        |
| $[\text{Sig\_T14b=PD1}] = \frac{([\text{T14b=PD1:PDL1=C14b}])}{([\text{T14b=PD1:PDL1=C14b}] + [\text{T14b=PD1}] + [\text{T14b=PD1:aPD1}] + 1\text{E-}100 * \text{mole})}$                                                                                                                                                                                                                                                                                                                                                                                                | Repeated        |
| $[\text{Sig\_T14c=CD80}] = \frac{([\text{T14c=CD80:PDL1=C14b}])}{([\text{T14c=CD80:PDL1=C14b}] + [\text{T14c=CD80}] + 1\text{E-}100 * \text{mole})}$                                                                                                                                                                                                                                                                                                                                                                                                                     | Repeated        |
| $[\text{Sig\_T15=Total}] = \frac{([\text{Sigweight\_T15a=PDL1}] * [\text{Sig\_T15a=PDL1}]}{[\text{Sigmax\_T15a=PDL1}] + [\text{Sigweight\_T15b=PD1}] * [\text{Sig\_T15b=PD1}]} + \frac{([\text{Sigweight\_T15a=PDL1}] * [\text{Sig\_T15a=PDL1}]}{[\text{Sigmax\_T15a=PDL1}] + [\text{Sigweight\_T15b=PD1}] * [\text{Sig\_T15b=PD1}]} * [\text{gamma\_Sig1}] * (1 - [\text{Sig\_T=Other}]) + [\text{Sig\_T=Other}]$                                                                                                                                                       | Repeated        |
| $[\text{Sig\_T15a=PDL1}] = \frac{([\text{T15a=PDL1:CD80=C15c}] + [\text{T15a=PDL1:PD1=C15a}])}{([\text{T15a=PDL1:CD80=C15c}] + [\text{T15a=PDL1:PD1=C15a}] + [\text{T15a=PDL1}] + [\text{T15a=PDL1:aPDL1}] + 1\text{E-}100 * \text{mole})}$                                                                                                                                                                                                                                                                                                                              | Repeated        |
| $[\text{Sig\_T15b=PD1}] = \frac{([\text{T15b=PD1:PDL2=C15b}])}{([\text{T15b=PD1:PDL2=C15b}] + [\text{T15b=PD1}] + [\text{T15b=PD1:aPD1}] + 1\text{E-}100 * \text{mole})}$                                                                                                                                                                                                                                                                                                                                                                                                | Repeated        |
| $[\text{Sig\_T16=Total}] = \frac{([\text{Sigweight\_T16a=PDL1}] * [\text{Sig\_T16a=PDL1}]}{[\text{Sigmax\_T16a=PDL1}] + [\text{Sigweight\_T16c=CD80}] * [\text{Sig\_T16c=CD80}]} + \frac{([\text{Sigweight\_T16a=PDL1}] * [\text{Sig\_T16a=PDL1}]}{[\text{Sigmax\_T16a=PDL1}] + [\text{Sigweight\_T16b=PD1}] * [\text{Sig\_T16b=PD1}]} + \frac{([\text{Sigweight\_T16c=CD80}] * [\text{Sig\_T16c=CD80}]}{[\text{Sigmax\_T16c=CD80}]^{\text{gamma\_Sig1}}} * (1 - [\text{Sig\_T=Other}]) + [\text{Sig\_T=Other}]$                                                         | Repeated        |
| $[\text{Sig\_T16a=PDL1}] = \frac{([\text{T16a=PDL1:PD1=C16a}] + [\text{T16a=PDL1:CD80=C16d}])}{([\text{T16a=PDL1:PD1=C16a}] + [\text{T16a=PDL1:CD80=C16d}] + [\text{T16a=PDL1}] + [\text{T16a=PDL1:aPDL1}] + 1\text{E-}100 * \text{mole})}$                                                                                                                                                                                                                                                                                                                              | Repeated        |
| $[\text{Sig\_T16b=PD1}] = \frac{([\text{T16b=PD1:PDL2=C16c}] + [\text{T16b=PD1:PDL1=C16b}])}{([\text{T16b=PD1:PDL2=C16c}] + [\text{T16b=PD1:PDL1=C16b}] + [\text{T16b=PD1}] + [\text{T16b=PD1:aPD1}] + 1\text{E-}100 * \text{mole})}$                                                                                                                                                                                                                                                                                                                                    | Repeated        |
| $[\text{Sig\_T16c=CD80}] = \frac{([\text{T16c=CD80:PDL1=C16b}])}{([\text{T16c=CD80:PDL1=C16b}] + [\text{T16c=CD80}] + 1\text{E-}100 * \text{mole})}$                                                                                                                                                                                                                                                                                                                                                                                                                     | Repeated        |
| $[\text{Sig\_T2=PDL1}] = \frac{([\text{T2=PDL1:PD1=C2}])}{([\text{T2=PDL1:PD1=C2}] + [\text{T2=PDL1}] + [\text{T2=PDL1:aPDL1}] + 1\text{E-}100 * \text{mole})}$                                                                                                                                                                                                                                                                                                                                                                                                          | Repeated        |
| $[\text{Sig\_T2=Total}] = \frac{([\text{Sigweight\_T2=PDL1}] * [\text{Sig\_T2=PDL1}]}{[\text{Sigmax\_T2=PDL1}] + [\text{Sigweight\_T2=PDL1}] * [\text{Sig\_T2=PDL1}]} * [\text{gamma\_Sig1}] * (1 - [\text{Sig\_T=Other}]) + [\text{Sig\_T=Other}]$                                                                                                                                                                                                                                                                                                                      | Repeated        |
| $[\text{Sig\_T3=Total}] = \frac{([\text{Sigweight\_T3a=PD1}] * [\text{Sig\_T3a=PD1}]}{[\text{Sigmax\_T3a=PD1}] + [\text{Sigweight\_T3b=CD80}] * [\text{Sig\_T3b=CD80}]} + \frac{([\text{Sigweight\_T3a=PD1}] * [\text{Sig\_T3a=PD1}]}{[\text{Sigmax\_T3a=PD1}] + [\text{Sigweight\_T3b=CD80}] * [\text{Sig\_T3b=CD80}]} * [\text{gamma\_Sig1}] * (1 - [\text{Sig\_T=Other}]) + [\text{Sig\_T=Other}]$                                                                                                                                                                    | Repeated        |
| $[\text{Sig\_T3a=PD1}] = \frac{([\text{T3a=PD1:PDL1=C3}])}{([\text{T3a=PD1:PDL1=C3}] + [\text{T3a=PD1}] + [\text{T3a=PD1:aPD1}] + 1\text{E-}100 * \text{mole})}$                                                                                                                                                                                                                                                                                                                                                                                                         | Repeated        |
| $[\text{Sig\_T3b=CD80}] = \frac{([\text{T3b=CD80:PDL1=C3}])}{([\text{T3b=CD80:PDL1=C3}] + [\text{T3b=CD80}] + 1\text{E-}100 * \text{mole})}$                                                                                                                                                                                                                                                                                                                                                                                                                             | Repeated        |
| $[\text{Sig\_T4=PD1}] = \frac{([\text{T4=PD1:PDL2=C4}])}{([\text{T4=PD1:PDL2=C4}] + [\text{T4=PD1}] + [\text{T4=PD1:aPD1}] + 1\text{E-}100 * \text{mole})}$                                                                                                                                                                                                                                                                                                                                                                                                              | Repeated        |
| $[\text{Sig\_T4=Total}] = \frac{([\text{Sigweight\_T4=PD1}] * [\text{Sig\_T4=PD1}]}{[\text{Sigmax\_T4=PD1}] + [\text{Sigweight\_T4=PD1}] * [\text{Sig\_T4=PD1}]} * [\text{gamma\_Sig1}] * (1 - [\text{Sig\_T=Other}]) + [\text{Sig\_T=Other}]$                                                                                                                                                                                                                                                                                                                           | Repeated        |
| $[\text{Sig\_T5=PDL1}] = \frac{([\text{T5=PDL1:CD80=C5}])}{([\text{T5=PDL1:CD80=C5}] + [\text{T5=PDL1}] + [\text{T5=PDL1:aPDL1}] + 1\text{E-}100 * \text{mole})}$                                                                                                                                                                                                                                                                                                                                                                                                        | Repeated        |
| $[\text{Sig\_T5=Total}] = \frac{([\text{Sigweight\_T5=PDL1}] * [\text{Sig\_T5=PDL1}]}{[\text{Sigmax\_T5=PDL1}] + [\text{Sigweight\_T5=PDL1}] * [\text{Sig\_T5=PDL1}]} * [\text{gamma\_Sig1}] * (1 - [\text{Sig\_T=Other}]) + [\text{Sig\_T=Other}]$                                                                                                                                                                                                                                                                                                                      | Repeated        |
| $[\text{Sig\_T6=Total}] = \frac{([\text{Sigweight\_T6a=PDL1}] * [\text{Sig\_T6a=PDL1}]}{[\text{Sigmax\_T6a=PDL1}] + [\text{Sigweight\_T6b=PD1}] * [\text{Sig\_T6b=PD1}]} + \frac{([\text{Sigweight\_T6c=CD80}] * [\text{Sig\_T6c=CD80}]}{[\text{Sigmax\_T6c=CD80}]^{\text{gamma\_Sig1}}} + \frac{([\text{Sigweight\_T6a=PDL1}] * [\text{Sig\_T6a=PDL1}]}{[\text{Sigmax\_T6a=PDL1}] + [\text{Sigweight\_T6b=PD1}] * [\text{Sig\_T6b=PD1}]} * [\text{gamma\_Sig1}] * (1 - [\text{Sig\_T=Other}]) + [\text{Sig\_T=Other}]$                                                  | Repeated        |
| $[\text{Sig\_T6a=PDL1}] = \frac{([\text{T6a=PDL1:PD1=C6a}])}{([\text{T6a=PDL1:PD1=C6a}] + [\text{T6a=PDL1}] + [\text{T6a=PDL1:aPDL1}] + 1\text{E-}100 * \text{mole})}$                                                                                                                                                                                                                                                                                                                                                                                                   | Repeated        |
| $[\text{Sig\_T6b=PD1}] = \frac{([\text{T6b=PD1:PDL1=C6b}])}{([\text{T6b=PD1:PDL1=C6b}] + [\text{T6b=PD1}] + [\text{T6b=PD1:aPD1}] + 1\text{E-}100 * \text{mole})}$                                                                                                                                                                                                                                                                                                                                                                                                       | Repeated        |
| $[\text{Sig\_T6c=CD80}] = \frac{([\text{T6c=CD80:PDL1=C6b}])}{([\text{T6c=CD80:PDL1=C6b}] + [\text{T6c=CD80}] + 1\text{E-}100 * \text{mole})}$                                                                                                                                                                                                                                                                                                                                                                                                                           | Repeated        |
| $[\text{Sig\_T7=Total}] = \frac{([\text{Sigweight\_T7a=PDL1}] * [\text{Sig\_T7a=PDL1}]}{[\text{Sigmax\_T7a=PDL1}] + [\text{Sigweight\_T7b=PD1}] * [\text{Sig\_T7b=PD1}]} + \frac{([\text{Sigweight\_T7a=PDL1}] * [\text{Sig\_T7a=PDL1}]}{[\text{Sigmax\_T7a=PDL1}] + [\text{Sigweight\_T7b=PD1}] * [\text{Sig\_T7b=PD1}]} * [\text{gamma\_Sig1}] * (1 - [\text{Sig\_T=Other}]) + [\text{Sig\_T=Other}]$                                                                                                                                                                  | Repeated        |
| $[\text{Sig\_T7a=PDL1}] = \frac{([\text{T7a=PDL1:PD1=C7a}])}{([\text{T7a=PDL1:PD1=C7a}] + [\text{T7a=PDL1}] + [\text{T7a=PDL1:aPDL1}] + 1\text{E-}100 * \text{mole})}$                                                                                                                                                                                                                                                                                                                                                                                                   | Repeated        |
| $[\text{Sig\_T7b=PD1}] = \frac{([\text{T7b=PD1:PDL2=C7b}])}{([\text{T7b=PD1:PDL2=C7b}] + [\text{T7b=PD1}] + [\text{T7b=PD1:aPD1}] + 1\text{E-}100 * \text{mole})}$                                                                                                                                                                                                                                                                                                                                                                                                       | Repeated        |
| $[\text{Sig\_T8=Total}] = \frac{([\text{Sigweight\_T8a=PD1}] * [\text{Sig\_T8a=PD1}]}{[\text{Sigmax\_T8a=PD1}] + [\text{Sigweight\_T8b=CD80}] * [\text{Sig\_T8b=CD80}]} + \frac{([\text{Sigweight\_T8a=PD1}] * [\text{Sig\_T8a=PD1}]}{[\text{Sigmax\_T8a=PD1}] + [\text{Sigweight\_T8b=CD80}] * [\text{Sig\_T8b=CD80}]} * [\text{gamma\_Sig1}] * (1 - [\text{Sig\_T=Other}]) + [\text{Sig\_T=Other}]$                                                                                                                                                                    | Repeated        |
| $[\text{Sig\_T8a=PD1}] = \frac{([\text{T8a=PD1:PDL1=C8a}] + [\text{T8a=PD1:PDL2=C8b}])}{([\text{T8a=PD1:PDL1=C8a}] + [\text{T8a=PD1:PDL2=C8b}] + [\text{T8a=PD1}] + [\text{T8a=PD1:aPD1}] + 1\text{E-}100 * \text{mole})}$                                                                                                                                                                                                                                                                                                                                               | Repeated        |

| Parameter and Species Assignment Equation                                                                                                                                                                                                                                                                                                                                                                                                                                                                                          | Assignment Type |
|------------------------------------------------------------------------------------------------------------------------------------------------------------------------------------------------------------------------------------------------------------------------------------------------------------------------------------------------------------------------------------------------------------------------------------------------------------------------------------------------------------------------------------|-----------------|
| $[Sig\_T8b=CD80] = ([T8b=CD80:PDL1=C8a])/([T8b=CD80:PDL1=C8a] + [T8b=CD80] + 1E-100*mole)$                                                                                                                                                                                                                                                                                                                                                                                                                                         | Repeated        |
| $[Sig\_T9=PDL1] = ([T9=PDL1-PD1=C9a] + [T9=PDL1-CD80=C9b])/([T9=PDL1-PD1=C9a] + [T9=PDL1-CD80=C9b] + [T9=PDL1] + [T9=PDL1:aPDL1] + 1E-100*mole)$                                                                                                                                                                                                                                                                                                                                                                                   | Repeated        |
| $[Sig\_T9=Total] = (([Sigweight\_T9=PDL1]*[Sig\_T9=PDL1]/[Sigmax\_T9=PDL1])^{\gamma_{Sig}}/(1 + ([Sigweight\_T9=PDL1]*[Sig\_T9=PDL1]/[Sigmax\_T9=PDL1])^{\gamma_{Sig}}*(1-[Sig\_T=Other]) + [Sig\_T=Other])$                                                                                                                                                                                                                                                                                                                       | Repeated        |
| $[Sig\_TrAPCT=CTLA4] = ([CTLA4:CD80\_TrAT] + [CTLA4:CD86\_TrAT])/([CTLA4:CD80\_TrAT] + [CTLA4:CD86\_TrAT] + [CD80\_mAPCT] + [CD86\_mAPCT] + [CTLA4\_CTLA4-Trt] + 1E-100*mole)$                                                                                                                                                                                                                                                                                                                                                     | Repeated        |
| $[Sig\_TrAPCT=Total] = (([Sig\_TrAPCT=CTLA4]/[Sigmax\_TrAPCT=CTLA4])^{\gamma_{Sig}} / (1 + ([Sig\_TrAPCT=CTLA4]/[Sigmax\_TrAPCT=CTLA4])^{\gamma_{Sig}}*(1-[Sig\_TrAPC = Other]) + [Sig\_TrAPC = Other])$                                                                                                                                                                                                                                                                                                                           | Repeated        |
| $[Sig\_TrPNT=PD1/L1/CD80] = (([SigWeight\_TrPNT=CD80]*[CD80Sig\_Tr-PNT]/[Sigmax\_TrPNT=CD80] + [SigWeight\_TrPNT=PD1]*[PD1Sig\_Tr-PNT]/[Sigmax\_TrPNT=PD1] + [SigWeight\_TrPNT=PDL1]*[PDL1Sig\_Tr-PNT]/[Sigmax\_TrPNT=PDL1])^{\gamma_{SigTr}} / (1 + ([SigWeight\_TrPNT=CD80]*[CD80Sig\_Tr-PNT]/[Sigmax\_TrPNT=CD80] + [SigWeight\_TrPNT=PD1]*[PD1Sig\_Tr-PNT]/[Sigmax\_TrPNT=PD1] + [SigWeight\_TrPNT=PDL1]*[PDL1Sig\_Tr-PNT]/[Sigmax\_TrPNT=PDL1]))^{\gamma_{SigTr}}*(1 - [SigWeight\_TrPNT=Other]) + [SigWeight\_TrPNT=Other])$ | Repeated        |
| $[Sig\_TrTeff=CD80] = ([PDL1:CD80\_TrTeff])/([PDL1:CD80\_TrTeff] + [CD80\_TeffT] + 1E-100*mole)$                                                                                                                                                                                                                                                                                                                                                                                                                                   | Repeated        |
| $[Sig\_TrTeff=PD1] = ([PDL1:PD1\_TrTeff])/([PDL1:PD1\_TrTeff] + [PD1\_TeffT] + [PD1:aPD1\_Teff] + 1E-100*mole)$                                                                                                                                                                                                                                                                                                                                                                                                                    | Repeated        |
| $[Sig\_TrTeff=PDL1] = ([PDL1:PDL1\_TrTeff])/([PDL1:PDL1\_TrTeff] + [PDL1\_TeffT] + [PDL1:aPDL1\_Teff] + 1E-100*mole)$                                                                                                                                                                                                                                                                                                                                                                                                              | Repeated        |
| $[Sig\_TrTeff=Total] = (([Sigweight\_TrTeff=PD1]*[Sig\_TrTeff=PD1]/[Sigmax\_TrTeff=PD1] + [Sigweight\_TrTeff=PDL1]*[Sig\_TrTeff=PDL1]/[Sigmax\_TrTeff=PDL1] + [Sigweight\_TrTeff=CD80]*[Sig\_TrTeff=CD80]/[Sigmax\_TrTeff=CD80])^{\gamma_{Sig}}/(1 + ([Sigweight\_TrTeff=PD1]*[Sig\_TrTeff=PD1]/[Sigmax\_TrTeff=PD1] + [Sigweight\_TrTeff=PDL1]*[Sig\_TrTeff=PDL1]/[Sigmax\_TrTeff=PDL1] + [Sigweight\_TrTeff=CD80]*[Sig\_TrTeff=CD80]/[Sigmax\_TrTeff=CD80])^{\gamma_{Sig}}*(1 - [Sig\_TrTeff = Other]) + [Sig\_TrTeff = Other])$ | Repeated        |
| $[Success\_NT-mAPC] = 500$                                                                                                                                                                                                                                                                                                                                                                                                                                                                                                         | Repeated        |
| $[Success\_PNT-mAPC] = 50$                                                                                                                                                                                                                                                                                                                                                                                                                                                                                                         | Repeated        |
| $[V\_T:C\_10] = ((4*\pi*(([T-mAPC\_Cell\_Size]/2)^2)*([T\{PD1\}\{L1\}\{80\} - \{PD1\}\{L1\}\{L2\}C])*(Cancer\_per\_T\_Cell\_Int/Cancer\_per\_T\_Cell\_max)*15E-3*(L/mole))*(1E-15)*(IS\_Scaling)$                                                                                                                                                                                                                                                                                                                                  | Repeated        |
| $[V\_T:C\_11] = ((4*\pi*(([T-mAPC\_Cell\_Size]/2)^2)*([T\{PD1\}\{L1\} - \{PDL1\}\{80\}C])*(Cancer\_per\_T\_Cell\_Int/Cancer\_per\_T\_Cell\_max)*15E-3*(L/mole))*(1E-15)*(IS\_Scaling)$                                                                                                                                                                                                                                                                                                                                             | Repeated        |
| $[V\_T:C\_12] = ((4*\pi*(([T-mAPC\_Cell\_Size]/2)^2)*([T\{PD1\}\{L1\} - \{PDL2\}\{80\}C])*(Cancer\_per\_T\_Cell\_Int/Cancer\_per\_T\_Cell\_max)*15E-3*(L/mole))*(1E-15)*(IS\_Scaling)$                                                                                                                                                                                                                                                                                                                                             | Repeated        |
| $[V\_T:C\_13] = ((4*\pi*(([T-mAPC\_Cell\_Size]/2)^2)*([T\{PD1\}\{L1\} - \{PDL1\}\{80\}\{L2\}C])*(Cancer\_per\_T\_Cell\_Int/Cancer\_per\_T\_Cell\_max)*15E-3*(L/mole))*(1E-15)*(IS\_Scaling)$                                                                                                                                                                                                                                                                                                                                       | Repeated        |
| $[V\_T:C\_14] = ((4*\pi*(([T-mAPC\_Cell\_Size]/2)^2)*([T\{PD1\}\{L1\}\{80\} - \{PD1\}\{80\}\{L1\}C])*(Cancer\_per\_T\_Cell\_Int/Cancer\_per\_T\_Cell\_max)*15E-3*(L/mole))*(1E-15)*(IS\_Scaling)$                                                                                                                                                                                                                                                                                                                                  | Repeated        |
| $[V\_T:C\_15] = ((4*\pi*(([T-mAPC\_Cell\_Size]/2)^2)*([T\{PD1\}\{L1\} - \{PD1\}\{80\}\{PDL2\}C])*(Cancer\_per\_T\_Cell\_Int/Cancer\_per\_T\_Cell\_max)*15E-3*(L/mole))*(1E-15)*(IS\_Scaling)$                                                                                                                                                                                                                                                                                                                                      | Repeated        |
| $[V\_T:C\_16] = ((4*\pi*(([T-mAPC\_Cell\_Size]/2)^2)*([T\{PD1\}\{L1\}\{80\} - \{PD1\}\{80\}\{L1\}\{L2\}C])*(Cancer\_per\_T\_Cell\_Int/Cancer\_per\_T\_Cell\_max)*15E-3*(L/mole))*(1E-15)*(IS\_Scaling)$                                                                                                                                                                                                                                                                                                                            | Repeated        |
| $[V\_T:C\_2] = ((4*\pi*(([T-mAPC\_Cell\_Size]/2)^2)*([T\{PDL1\} - \{PD1\}C])*(Cancer\_per\_T\_Cell\_Int/Cancer\_per\_T\_Cell\_max)*15E-3*(L/mole))*(1E-15)*(IS\_Scaling)$                                                                                                                                                                                                                                                                                                                                                          | Repeated        |
| $[V\_T:C\_3] = ((4*\pi*(([T-mAPC\_Cell\_Size]/2)^2)*([T\{PD1\}\{CD80\} - \{PDL1\}C])*(Cancer\_per\_T\_Cell\_Int/Cancer\_per\_T\_Cell\_max)*15E-3*(L/mole))*(1E-15)*(IS\_Scaling)$                                                                                                                                                                                                                                                                                                                                                  | Repeated        |
| $[V\_T:C\_4] = ((4*\pi*(([T-mAPC\_Cell\_Size]/2)^2)*([T\{PD1\} - \{PDL2\}C])*(Cancer\_per\_T\_Cell\_Int/Cancer\_per\_T\_Cell\_max)*15E-3*(L/mole))*(1E-15)*(IS\_Scaling)$                                                                                                                                                                                                                                                                                                                                                          | Repeated        |
| $[V\_T:C\_5] = ((4*\pi*(([T-mAPC\_Cell\_Size]/2)^2)*([T\{PDL1\} - \{CD80\}C])*(Cancer\_per\_T\_Cell\_Int/Cancer\_per\_T\_Cell\_max)*15E-3*(L/mole))*(1E-15)*(IS\_Scaling)$                                                                                                                                                                                                                                                                                                                                                         | Repeated        |
| $[V\_T:C\_6] = ((4*\pi*(([T-mAPC\_Cell\_Size]/2)^2)*([T\{PD1\}\{L1\}\{80\} - \{PD1\}\{L1\}C])*(Cancer\_per\_T\_Cell\_Int/Cancer\_per\_T\_Cell\_max)*15E-3*(L/mole))*(1E-15)*(IS\_Scaling)$                                                                                                                                                                                                                                                                                                                                         | Repeated        |
| $[V\_T:C\_7] = ((4*\pi*(([T-mAPC\_Cell\_Size]/2)^2)*([T\{PD1\}\{L1\} - \{PD1\}\{L2\}C])*(Cancer\_per\_T\_Cell\_Int/Cancer\_per\_T\_Cell\_max)*15E-3*(L/mole))*(1E-15)*(IS\_Scaling)$                                                                                                                                                                                                                                                                                                                                               | Repeated        |
| $[V\_T:C\_8] = ((4*\pi*(([T-mAPC\_Cell\_Size]/2)^2)*([T\{PD1\}\{80\} - \{PDL1\}\{PDL2\}C])*(Cancer\_per\_T\_Cell\_Int/Cancer\_per\_T\_Cell\_max)*15E-3*(L/mole))*(1E-15)*(IS\_Scaling)$                                                                                                                                                                                                                                                                                                                                            | Repeated        |
| $[V\_T:C\_9] = ((4*\pi*(([T-mAPC\_Cell\_Size]/2)^2)*([T\{PDL1\} - \{CD80\}\{PD1\}C])*(Cancer\_per\_T\_Cell\_Int/Cancer\_per\_T\_Cell\_max)*15E-3*(L/mole))*(1E-15)*(IS\_Scaling)$                                                                                                                                                                                                                                                                                                                                                  | Repeated        |
| $[Vol\_Cell-Rec\_MDSC-TeffT] = ((4*\pi*(([TrLN-PNT\_Cell\_Size]/2)^2)*(MDSCsT\_EngTeff/T\_per\_Tr\_cell)*15E-3)*(1E-15)*(IS\_Scaling)*(L/mole)$                                                                                                                                                                                                                                                                                                                                                                                    | Repeated        |
| $[Vol\_Cell-Rec\_Tr-APCT] = ((4*\pi*(([TrLN-mAPC\_Cell\_Size]/2)^2)*(TregT\_EngAPC/mAPC\_per\_Tr\_cell)*15E-3)*(1E-15)*(IS\_Scaling)*(L/mole)$                                                                                                                                                                                                                                                                                                                                                                                     | Repeated        |
| $[Vol\_Cell-Rec\_Tr-mAPC] = ((4*\pi*(([TrLN-mAPC\_Cell\_Size]/2)^2)*(TregLN\_mAPC1/mAPC\_per\_Tr\_cell)*15E-3)*(1E-15)*(IS\_Scaling)*(L/mole)$                                                                                                                                                                                                                                                                                                                                                                                     | Repeated        |
| $[Vol\_Cell-Rec\_Tr-PNT] = ((4*\pi*(([TrLN-PNT\_Cell\_Size]/2)^2)*(TregLN-PNT1/T\_per\_Tr\_cell)*15E-3)*(1E-15)*(IS\_Scaling)*(L/mole)$                                                                                                                                                                                                                                                                                                                                                                                            | Repeated        |
| $[Vol\_Cell-Rec\_Tr-TeffT] = ((4*\pi*(([TrLN-PNT\_Cell\_Size]/2)^2)*(TregT\_EngTeff/T\_per\_Tr\_cell)*15E-3)*(1E-15)*(IS\_Scaling)*(L/mole)$                                                                                                                                                                                                                                                                                                                                                                                       | Repeated        |

| Parameter and Species Assignment Equation                                                                                                                                                                                                                                                                                                                                                                                                                                                                                                                                                                                                                                                                     | Assignment Type |
|---------------------------------------------------------------------------------------------------------------------------------------------------------------------------------------------------------------------------------------------------------------------------------------------------------------------------------------------------------------------------------------------------------------------------------------------------------------------------------------------------------------------------------------------------------------------------------------------------------------------------------------------------------------------------------------------------------------|-----------------|
| $[Volume\_NT-Receptor\_Int] = ((4 * \pi * (([T-mAPC\_Cell\_Size]/2)^2) * (mAPC\_Int\_P1/mAPC\_per\_T\_cell) * 15E-3) * (L/mole)) * (1E-15) * (IS\_Scaling)$                                                                                                                                                                                                                                                                                                                                                                                                                                                                                                                                                   | Repeated        |
| $[Volume\_PNT-Receptor\_Int] = ((4 * \pi * (([T-mAPC\_Cell\_Size]/2)^2) * (mAPC\_Int\_P2/mAPC\_per\_T\_cell) * 15E-3) * (L/mole)) * (1E-15) * (IS\_Scaling)$                                                                                                                                                                                                                                                                                                                                                                                                                                                                                                                                                  | Repeated        |
| $Cancer\_Cell\_Vol\_mm3 = (4/3) * \pi * (([Cancer\_Cell\_Diam\_um]/2000)^3)$                                                                                                                                                                                                                                                                                                                                                                                                                                                                                                                                                                                                                                  | Initial         |
| $Cancer\_Diam\_mm = ((6 * Cancer)/( \pi * Tumor\_Vol\_Ellipse\_c\_ratio * (1/((4/3) * \pi * ((Cancer\_Cell\_Diam\_um/2000)^3)))) * (1 - Total\_Tumor\_Void\_Frac) * mole)^{1/3}$                                                                                                                                                                                                                                                                                                                                                                                                                                                                                                                              | Repeated        |
| $Cancer\_Vol\_cm3 = (4/3) * \pi * (([Cancer\_Diam\_mm]/2)^2) * (([Cancer\_Diam\_mm] * [Tumor\_Vol\_Ellipse\_c\_ratio])/2000)$                                                                                                                                                                                                                                                                                                                                                                                                                                                                                                                                                                                 | Repeated        |
| $CTLA4Sig\_TrLN = [TrLN\_CT\_aCT]/([TrLN\_CT\_aCT] + [TrLN\_CTLA4] + 1E-100 * mole)$                                                                                                                                                                                                                                                                                                                                                                                                                                                                                                                                                                                                                          | Repeated        |
| $Frac\_CD80\_Exp\_Cancer = \%CD80\_Exp\_Cancer/100$                                                                                                                                                                                                                                                                                                                                                                                                                                                                                                                                                                                                                                                           | Repeated        |
| $Frac\_PD1\_Exp\_Cancer = \%PD1\_Exp\_Cancer/100$                                                                                                                                                                                                                                                                                                                                                                                                                                                                                                                                                                                                                                                             | Repeated        |
| $Frac\_PDL1\_Exp\_Cancer = \%PDL1\_Exp\_Cancer/100$                                                                                                                                                                                                                                                                                                                                                                                                                                                                                                                                                                                                                                                           | Repeated        |
| $Frac\_PDL2\_Exp\_Cancer = \%PDL2\_Exp\_Cancer/100$                                                                                                                                                                                                                                                                                                                                                                                                                                                                                                                                                                                                                                                           | Repeated        |
| $Liv\_Spln\_GLiver\_Free\_Sites = Adhesion\_D\_Lung\_Liv\_spln * Vv\_Liver - EffT\_Liver\_b\_Vasc - EffT\_Liver\_AR\_Vasc$                                                                                                                                                                                                                                                                                                                                                                                                                                                                                                                                                                                    | Repeated        |
| $Liv\_Spln\_GLSpleen\_Free\_Sites = Adhesion\_D\_Lung\_Liv\_spln * Vv\_Spleen - EffT\_Spleen\_b\_Vasc - EffT\_Spleen\_AR\_Vasc$                                                                                                                                                                                                                                                                                                                                                                                                                                                                                                                                                                               | Repeated        |
| $Lungs\_Lung\_Free\_Sites = Adhesion\_D\_Lung\_Liv\_spln * Vv\_Lungs - EffT\_r\_LungsVasc - EffT\_AR\_LungsVasc$                                                                                                                                                                                                                                                                                                                                                                                                                                                                                                                                                                                              | Repeated        |
| $Lymph\_Node.[Total\_T\_CD8-CD4] = Total\_T\_per\_TDLN$                                                                                                                                                                                                                                                                                                                                                                                                                                                                                                                                                                                                                                                       | Repeated        |
| $Lymph\_Node.[TregLN-PNT1] = Lymph\_Node.[TregLN-PNT] + 0.001 * mole$                                                                                                                                                                                                                                                                                                                                                                                                                                                                                                                                                                                                                                         | Repeated        |
| $Lymph\_Node.CTLA4\_mab\_ugml = (Lymph\_Node.CTLA4\_mab * Ipilimumab\_MW)/VL$                                                                                                                                                                                                                                                                                                                                                                                                                                                                                                                                                                                                                                 | Repeated        |
| $Lymph\_Node.mAPC\_cells\_per\_ml = mAPC/Vext\_LN$                                                                                                                                                                                                                                                                                                                                                                                                                                                                                                                                                                                                                                                            | Repeated        |
| $Lymph\_Node.mAPC\_Int\_P1 = 0.001 * mole + gt(Naive\_T1,0) * gt(Primed\_Naive\_T1 + Naive\_T1,0) * (Naive\_T1 * [mAPC\_per\_T\_cell] * gt(((Naive\_T1 * mAPC)/(Primed\_Naive\_T1 + Naive\_T1 + 1E-100 * mole)) / (Naive\_T1 * [mAPC\_per\_T\_cell] + 1E-100 * mole), 1) + (Naive\_T1 / (Primed\_Naive\_T1 + Naive\_T1 + 1E-100 * mole)) * mAPC * le(((Naive\_T1 * mAPC)/(Primed\_Naive\_T1 + Naive\_T1 + 1E-100 * mole)) / (Naive\_T1 * [mAPC\_per\_T\_cell] + 1E-100 * mole), 1))$                                                                                                                                                                                                                          | Repeated        |
| $Lymph\_Node.mAPC\_Int\_P2 = 0.001 * mole + gt(Primed\_Naive\_T1,0) * gt(Primed\_Naive\_T1 + Naive\_T1,0) * (Primed\_Naive\_T1 * [mAPC\_per\_T\_cell] * gt(((Primed\_Naive\_T1 * mAPC)/(Primed\_Naive\_T1 + Naive\_T1 + 1E-100 * mole)) / (Primed\_Naive\_T1 * [mAPC\_per\_T\_cell] + 1E-100 * mole), 1) + (Primed\_Naive\_T1 / (Primed\_Naive\_T1 + Naive\_T1 + 1E-100 * mole)) * mAPC * le(((Primed\_Naive\_T1 * mAPC)/(Primed\_Naive\_T1 + Naive\_T1 + 1E-100 * mole)) / (Primed\_Naive\_T1 * [mAPC\_per\_T\_cell] + 1E-100 * mole), 1))$                                                                                                                                                                  | Repeated        |
| $Lymph\_Node.mAPC\_nInt = (mAPC - mAPC\_Int\_P1 - mAPC\_Int\_P2) * ge(mAPC - mAPC\_Int\_P1 - mAPC\_Int\_P2, 0)$                                                                                                                                                                                                                                                                                                                                                                                                                                                                                                                                                                                               | Repeated        |
| $Lymph\_Node.mAPC\_Total\_Calc\_Pr = (mAPC - mAPC\_Int\_P1 - mAPC\_Int\_P2) * ge(mAPC - mAPC\_Int\_P1 - mAPC\_Int\_P2, 0)$                                                                                                                                                                                                                                                                                                                                                                                                                                                                                                                                                                                    | Repeated        |
| $Lymph\_Node.mAPC1 = mAPC - [TregLN\_mAPC]$                                                                                                                                                                                                                                                                                                                                                                                                                                                                                                                                                                                                                                                                   | Repeated        |
| $Lymph\_Node.Naive\_T = Lymph\_Node.Naive\_T0$                                                                                                                                                                                                                                                                                                                                                                                                                                                                                                                                                                                                                                                                | Initial         |
| $Lymph\_Node.Naive\_T0 = T\_Cell\_Clonality * [Copies-per-T\_Cell\_Clone]$                                                                                                                                                                                                                                                                                                                                                                                                                                                                                                                                                                                                                                    | Repeated        |
| $Lymph\_Node.Naive\_T2 = Naive\_T - [TregLN-NT]$                                                                                                                                                                                                                                                                                                                                                                                                                                                                                                                                                                                                                                                              | Repeated        |
| $Lymph\_Node.NT1\_Int1 = Naive\_T + 0.001 * mole$                                                                                                                                                                                                                                                                                                                                                                                                                                                                                                                                                                                                                                                             | Repeated        |
| $Lymph\_Node.PD1\_mabLN\_ugml = (Lymph\_Node.PD1\_mab * Nivolumab\_MW)/VL$                                                                                                                                                                                                                                                                                                                                                                                                                                                                                                                                                                                                                                    | Repeated        |
| $Lymph\_Node.PDL1\_mabLN\_ugml = (Lymph\_Node.PDL1\_mab * Durvalumab\_MW)/VL$                                                                                                                                                                                                                                                                                                                                                                                                                                                                                                                                                                                                                                 | Repeated        |
| $Lymph\_Node.PNT1\_Int = Lymph\_Node.Primed\_Naive\_T1 + 0.001 * mole$                                                                                                                                                                                                                                                                                                                                                                                                                                                                                                                                                                                                                                        | Repeated        |
| $Lymph\_Node.Primed\_Naive\_T2 = Primed\_Naive\_T - [TregLN-PNT]$                                                                                                                                                                                                                                                                                                                                                                                                                                                                                                                                                                                                                                             | Repeated        |
| $Lymph\_Node.TregLN = ((Naive\_T0) * (([Tr\_LN]/[NT\_LN]) - TregLN\_mAPC - [TregLN-NT] - [TregLN-PNT])) * gt(mAPC, 0) * (1 - [CTLA4Sig\_TrLN])$                                                                                                                                                                                                                                                                                                                                                                                                                                                                                                                                                               | Repeated        |
| $Lymph\_Node.TregLN\_mAPC1 = Lymph\_Node.TregLN\_mAPC + 0.001 * mole$                                                                                                                                                                                                                                                                                                                                                                                                                                                                                                                                                                                                                                         | Repeated        |
| $Peripheral.CTLA4\_leaky\_ugml = (Peripheral.CTLA4\_mabP\_leaky * Ipilimumab\_MW)/(0.35 * ISF)$                                                                                                                                                                                                                                                                                                                                                                                                                                                                                                                                                                                                               | Repeated        |
| $Peripheral.CTLA4\_tight\_ugml = (Peripheral.CTLA4\_mabP\_tight * Ipilimumab\_MW)/(0.65 * ISF)$                                                                                                                                                                                                                                                                                                                                                                                                                                                                                                                                                                                                               | Repeated        |
| $Peripheral.PD1\_leaky\_ugml = (Peripheral.PD1\_mabP\_leaky * Nivolumab\_MW)/(0.35 * ISF)$                                                                                                                                                                                                                                                                                                                                                                                                                                                                                                                                                                                                                    | Repeated        |
| $Peripheral.PD1\_tight\_ugml = (Peripheral.PD1\_mabP\_tight * Nivolumab\_MW)/(0.65 * ISF)$                                                                                                                                                                                                                                                                                                                                                                                                                                                                                                                                                                                                                    | Repeated        |
| $Peripheral.PDL1\_leaky\_ugml = (Peripheral.PDL1\_mabP\_leaky * Durvalumab\_MW)/(0.35 * ISF)$                                                                                                                                                                                                                                                                                                                                                                                                                                                                                                                                                                                                                 | Repeated        |
| $Peripheral.PDL1\_tight\_ugml = (Peripheral.PDL1\_mabP\_tight * Durvalumab\_MW)/(0.65 * ISF)$                                                                                                                                                                                                                                                                                                                                                                                                                                                                                                                                                                                                                 | Repeated        |
| $Precursor\_Frequen\_NT = Naive\_T / [Total\_T\_CD8-CD4]$                                                                                                                                                                                                                                                                                                                                                                                                                                                                                                                                                                                                                                                     | Repeated        |
| $Precursor\_Frequen\_PNT = Primed\_Naive\_T / [Total\_T\_CD8-CD4]$                                                                                                                                                                                                                                                                                                                                                                                                                                                                                                                                                                                                                                            | Repeated        |
| $Starting\_Cancer\_Diam\_mm = Cancer\_mm\_Start\_Therapy * 0.95$                                                                                                                                                                                                                                                                                                                                                                                                                                                                                                                                                                                                                                              | Repeated        |
| $T\_Density = [Total\_T\_CD8-CD4] / ((4/3) * \pi * TDLN\_Radius^3)$                                                                                                                                                                                                                                                                                                                                                                                                                                                                                                                                                                                                                                           | Repeated        |
| $TDLN\_Radius = 10000 * (([Vol\_per\_TDLN] * (3/(4 * \pi)))^{1/3})$                                                                                                                                                                                                                                                                                                                                                                                                                                                                                                                                                                                                                                           | Repeated        |
| $Total\_TC\_Sig = [Sig\_T1=Total] * \% \{Other\} C + [Sig\_T2=Total] * \% \{PD1\} C + [Sig\_T3=Total] * \% \{PDL1\} C + [Sig\_T4=Total] * \% \{PDL2\} C + [Sig\_T5=Total] * \% \{CD80\} C + [Sig\_T6=Total] * \% \{PD1\} \{L1\} C + [Sig\_T7=Total] * \% \{PD1\} \{L2\} C + [Sig\_T8=Total] * \% \{PDL1\} \{PDL2\} C + [Sig\_T9=Total] * \% \{CD80\} \{PD1\} C + [Sig\_T10=Total] * \% \{PD1\} \{L1\} \{L2\} C + [Sig\_T11=Total] * \% \{PDL1\} \{80\} C + [Sig\_T12=Total] * \% \{PDL2\} \{80\} C + [Sig\_T13=Total] * \% \{PDL1\} \{80\} \{L2\} C + [Sig\_T14=Total] * \% \{PD1\} \{80\} \{L1\} C + [Sig\_T15=Total] * \% \{PD1\} \{80\} \{PDL2\} C + [Sig\_T16=Total] * \% \{PD1\} \{80\} \{L1\} \{L2\} C$ | Repeated        |
| $Total\_Tumor\_Void\_Frac = Tumor\_Void\_Fraction + Frac\_Vv\_Tmr$                                                                                                                                                                                                                                                                                                                                                                                                                                                                                                                                                                                                                                            | Repeated        |
| $Tumor.[C\{CD80\}] = 0.001 * mole + TC1 * \% \{CD80\} C$                                                                                                                                                                                                                                                                                                                                                                                                                                                                                                                                                                                                                                                      | Repeated        |
| $Tumor.[C\{PD1\}] = 0.001 * mole + TC1 * \% \{PD1\} C$                                                                                                                                                                                                                                                                                                                                                                                                                                                                                                                                                                                                                                                        | Repeated        |
| $Tumor.[C\{PD1\}\{CD80\}] = 0.001 * mole + TC1 * \% \{CD80\} \{PD1\} C$                                                                                                                                                                                                                                                                                                                                                                                                                                                                                                                                                                                                                                       | Repeated        |

| Parameter and Species Assignment Equation                                                                                                                                                      | Assignment Type |
|------------------------------------------------------------------------------------------------------------------------------------------------------------------------------------------------|-----------------|
| Tumor.[C{PD1}{PDL1}] = 0.001*mole+TC1*[%{PD1}{L1}C]                                                                                                                                            | Repeated        |
| Tumor.[C{PD1}{PDL1}{CD80}] = 0.001*mole+TC1*[%{PD1}{80}{L1}C]                                                                                                                                  | Repeated        |
| Tumor.[C{PD1}{PDL1}{PDL2}] = 0.001*mole+TC1*[%{PD1}{L1}{L2}C]                                                                                                                                  | Repeated        |
| Tumor.[C{PD1}{PDL1}{PDL2}{CD80}] = 0.001*mole+TC1*[%{PD1}{80}{L1}{L2}C]                                                                                                                        | Repeated        |
| Tumor.[C{PD1}{PDL2}] = 0.001*mole+TC1*[%{PD1}{L2}C]                                                                                                                                            | Repeated        |
| Tumor.[C{PD1}{PDL2}{CD80}] = 0.001*mole+TC1*[%{PD1}{80}{PDL2}C]                                                                                                                                | Repeated        |
| Tumor.[C{PDL1}] = 0.001*mole+TC1*[%{PDL1}C]                                                                                                                                                    | Repeated        |
| Tumor.[C{PDL1}{CD80}] = 0.001*mole+TC1*[%{PDL1}{80}C]                                                                                                                                          | Repeated        |
| Tumor.[C{PDL1}{PDL2}] = 0.001*mole+TC1*[%{PDL1}{PDL2}C]                                                                                                                                        | Repeated        |
| Tumor.[C{PDL1}{PDL2}{CD80}] = 0.001*mole+TC1*[%{PDL1}{80}{L2}C]                                                                                                                                | Repeated        |
| Tumor.[C{PDL2}] = 0.001*mole+TC1*[%{PDL2}C]                                                                                                                                                    | Repeated        |
| Tumor.[C{PDL2}{CD80}] = 0.001*mole+TC1*[%{PDL2}{80}C]                                                                                                                                          | Repeated        |
| Tumor.[T{PD1}{80}-{PDL1}{PDL2}C] = 0.001*mole+TC2*[%{PDL1}{PDL2}C]                                                                                                                             | Repeated        |
| Tumor.[T{PD1}{CD80}-{PDL1}C] = 0.001*mole+TC2*[%{PDL1}C]                                                                                                                                       | Repeated        |
| Tumor.[T{PD1}{L1}{80}-{PDL1}{80}{L1}{L2}C] = 0.001*mole+TC2*[%{PD1}{80}{L1}{L2}C]                                                                                                              | Repeated        |
| Tumor.[T{PD1}{L1}{80}{80}-{PDL1}{80}{L1}C] = 0.001*mole+TC2*[%{PD1}{80}{L1}C]                                                                                                                  | Repeated        |
| Tumor.[T{PD1}{L1}{80}{80}-{PDL1}{L1}{L2}C] = 0.001*mole+TC2*[%{PD1}{L1}{L2}C]                                                                                                                  | Repeated        |
| Tumor.[T{PD1}{L1}{80}{80}-{PDL1}{L1}C] = 0.001*mole+TC2*[%{PD1}{L1}C]                                                                                                                          | Repeated        |
| Tumor.[T{PD1}{L1}-{PDL1}{80}{PDL2}C] = 0.001*mole+TC2*[%{PD1}{80}{PDL2}C]                                                                                                                      | Repeated        |
| Tumor.[T{PD1}{L1}-{PDL1}{L2}C] = 0.001*mole+TC2*[%{PD1}{L2}C]                                                                                                                                  | Repeated        |
| Tumor.[T{PD1}{L1}-{PDL1}{80}{L2}C] = 0.001*mole+TC2*[%{PDL1}{80}{L2}C]                                                                                                                         | Repeated        |
| Tumor.[T{PD1}{L1}-{PDL1}{80}C] = 0.001*mole+TC2*[%{PDL1}{80}C]                                                                                                                                 | Repeated        |
| Tumor.[T{PD1}{L1}-{PDL2}{80}C] = 0.001*mole+TC2*[%{PDL2}{80}C]                                                                                                                                 | Repeated        |
| Tumor.[T{PD1}{L1}-{PDL2}C] = 0.001*mole+TC2*[%{PDL2}C]                                                                                                                                         | Repeated        |
| Tumor.[T{PDL1}-{CD80}{PD1}C] = 0.001*mole+TC2*[%{CD80}{PD1}C]                                                                                                                                  | Repeated        |
| Tumor.[T{PDL1}-{CD80}C] = 0.001*mole+TC2*[%{CD80}C]                                                                                                                                            | Repeated        |
| Tumor.[T{PDL1}-{PD1}C] = 0.001*mole+TC2*[%{PD1}C]                                                                                                                                              | Repeated        |
| Tumor.Cancer =<br>(4/3)*pi*((Starting_Cancer_Diam_mm/2)^2)*((Starting_Cancer_Diam_mm*Tumor_Vol_Ellipse_c_ratio)/2)*1/((4/3)*pi*((Cancer_Cell_Diam_um/2000)^3))*((1-Total_Tumor_Void_Frac)*mole | Initial         |
| Tumor.Cancer1 = (Cancer-TC1)*ge(Cancer-TC1,0)                                                                                                                                                  | Repeated        |
| Tumor.CTLA4_mabt_ugml = (Tumor.CTLA4_mabt*Ipilimumab_MW)/Vex_Tmr                                                                                                                               | Repeated        |
| Tumor.Effector_TT_C_Eng = (Effector_TT-TregT_Teff - MDSCsT_Teff - TC2-T_Recover_Can_Dead)*ge(Effector_TT-TC2-T_Recover_Can_Dead,0)                                                             | Repeated        |
| Tumor.Effector_TT_Count = Effector_TT + Effector_TT_Res                                                                                                                                        | Repeated        |
| Tumor.Effector_TT_MDSCs = Effector_TT-TregT_Teff - MDSCsT_Teff - TC1                                                                                                                           | Repeated        |
| Tumor.Effector_TT_per_mL = Effector_TT_Count/Vex_Tmr                                                                                                                                           | Repeated        |
| Tumor.Effector_TT_per_Treg = (Effector_TT_Count/(Cancer*[%T_Tregs_per_Cancer]/100))*ge(Cancer,10*mole)                                                                                         | Repeated        |
| Tumor.Effector_TT_TregT = Effector_TT-TregT_Teff - MDSCsT_Teff - TC1                                                                                                                           | Repeated        |
| Tumor.mAPCT_EngTregT = mAPC_T+0.001*mole                                                                                                                                                       | Repeated        |
| Tumor.MDSC_T = (Cancer*[%T_Tregs_per_Cancer]/100)*[MDSCs_per_Treg] -MDSCsT_Teff                                                                                                                | Repeated        |
| Tumor.MDSCsT_EngTeff = MDSCsT_Teff+0.001*mole                                                                                                                                                  | Repeated        |
| Tumor.PD1_mabt_ugml = (Tumor.PD1_mabt*Nivolumab_MW)/Vex_Tmr                                                                                                                                    | Repeated        |
| Tumor.PDL1_mabt_ugml = (Tumor.PDL1_mabt*Durvalumab_MW)/Vex_Tmr                                                                                                                                 | Repeated        |
| Tumor.TC2 = TC1*T_per_Cancer_Cell_Int                                                                                                                                                          | Repeated        |
| Tumor.Teff_EngMDSC = MDSCsT_Teff+0.001*mole                                                                                                                                                    | Repeated        |
| Tumor.Teff_EngTregT = TregT_Teff+0.001*mole                                                                                                                                                    | Repeated        |
| Tumor.Tmr_Free_Sites = Vv_Tmr*Adhesion_Density_Tmr-EffT_b_Vasc-EffT_AR_Vasc                                                                                                                    | Repeated        |
| Tumor.TregT = (((Cancer*[%T_Tregs_per_Cancer]/100)) - TregT_Teff)*(1-[Sig_TrAPCT=Total])                                                                                                       | Repeated        |
| Tumor.TregT_EngAPC = mAPC_T+0.001*mole                                                                                                                                                         | Repeated        |
| Tumor.TregT_EngTeff = TregT_Teff+0.001*mole                                                                                                                                                    | Repeated        |
| Vex_Tmr = (Total_Tumor_Void_Frac - Frac_Vv_Tmr)*Vt_Teff                                                                                                                                        | Repeated        |
| Vt = Vex_Tmr + ml_correct                                                                                                                                                                      | Repeated        |
| Vt_Teff = ([Cancer_Vol_cm3]*0.001+1E-20)*L                                                                                                                                                     | Repeated        |
| Vv_Tmr = Vt_Teff*Frac_Vv_Tmr                                                                                                                                                                   | Repeated        |

Table S6 – Model Algebraic Equations (End)

Table S7 – Model Discontinuous Equation Sets (Start)

| Trigger                | Event Functions                                                         | Description              |
|------------------------|-------------------------------------------------------------------------|--------------------------|
| CTLA4_counter_on<=time | CTLA4_counter_off = time+0.0625*day;CTLA4mAb = CTLA4mAb_Dose*EndTherapy | CTLA4 counter for dosing |

| Trigger                                                                       | Event Functions                                                                                                                                                                                                                                                                                                                                                                                                                                    | Description                                     |
|-------------------------------------------------------------------------------|----------------------------------------------------------------------------------------------------------------------------------------------------------------------------------------------------------------------------------------------------------------------------------------------------------------------------------------------------------------------------------------------------------------------------------------------------|-------------------------------------------------|
| <b>CTLA4_counter_off&lt;=time</b>                                             | CTLA4_counter_on = time+Dose_sched_CTLA4 - 0.0625*day;CTLA4mAb = 0*(mg/kg)                                                                                                                                                                                                                                                                                                                                                                         | CTLA4 counter for dosing                        |
| <b>time&gt;=CTLA4_change_schedule</b>                                         | CTLA4mAb = 0*(mg/kg);CTLA4mAb_Dose = CTLA4mAb_New_Dose;New_sched_CTLA4 = 365*day + time;Dose_sched_CTLA4 = New_sched_CTLA4                                                                                                                                                                                                                                                                                                                         | CTLA4 change schedule for dosing                |
| <b>PD1_counter_on&lt;=time</b>                                                | PD1_counter_off = time+0.0416666*day;PD1mAb = PD1mAb_Dose*EndTherapy                                                                                                                                                                                                                                                                                                                                                                               | PD1 counter for dosing                          |
| <b>PD1_counter_off&lt;=time</b>                                               | PD1_counter_on = time+Dose_sched_PD1 - 0.0416666*day;PD1mAb = 0*(mg/kg)                                                                                                                                                                                                                                                                                                                                                                            | PD1 counter for dosing                          |
| <b>time&gt;=PD1_change_schedule</b>                                           | PD1mAb = 0*(mg/kg);PD1mAb_Dose = PD1mAb_New_Dose;Dose_sched_PD1 = New_sched_PD1;PD1_change_schedule = 1500*day                                                                                                                                                                                                                                                                                                                                     | PD1 change schedule for dosing                  |
| <b>PDL1_counter_off&lt;=time</b>                                              | PDL1_counter_on = time+Dose_sched_PDL1 - 0.0416666*day;PDL1mAb = 0*(mg/kg)                                                                                                                                                                                                                                                                                                                                                                         | PDL1 counter for dosing                         |
| <b>time&gt;=PDL1_change_schedule</b>                                          | PDL1mAb = 0*(mg/kg);PDL1mAb_Dose = PDL1mAb_New_Dose;Dose_sched_PDL1 = New_sched_PDL1;PDL1_change_schedule = 1500*day                                                                                                                                                                                                                                                                                                                               | PDL1 change schedule for dosing                 |
| <b>PDL1_counter_on&lt;=time</b>                                               | PDL1_counter_off = time+0.0416666*day;PDL1mAb = PDL1mAb_Dose*EndTherapy                                                                                                                                                                                                                                                                                                                                                                            | PDL1 counter for dosing                         |
| <b>Cancer&lt;=1*mole</b>                                                      | TheEnd = 0                                                                                                                                                                                                                                                                                                                                                                                                                                         | End extravasation at tumor death                |
| <b>Cancer&lt;=1.446759259259259e+05*mole</b>                                  | EndTherapy = 0;Time_Tumor_Death = time                                                                                                                                                                                                                                                                                                                                                                                                             | Stop therapy at tumor death                     |
| <b>Cancer_Diam_mm&gt;=Cancer_mm_Start_Therapy</b>                             | CTLA4mAb_Dose = CTLA4_DoseSet*(mg/kg);CTLA4_counter_on = time+0.0001*day;CTLA4_counter_off = CTLA4_counter_on + 0.0625*day;CTLA4_change_schedule = time + 64*day;Cancer_mm_Start_Therapy = Cancer_mm_Start_Therapy*100;Time_Start_Therapy = time;TCytokineHoming = 100                                                                                                                                                                             | CTLA4 dosing                                    |
| <b>Cancer_Diam_mm&gt;=Cancer_mm_Start_Therapy</b>                             | CTLA4mAb_Dose = CTLA4_DoseSet*(mg/kg);CTLA4_counter_on = time+0.0001*day;CTLA4_counter_off = CTLA4_counter_on + 0.0625*day;CTLA4_change_schedule = time + 64*day;PD1_counter_on = time+0.0001*day;PD1_counter_off = PD1_counter_on + 0.0416666*day;PD1mAb_Dose = PD1_DoseSet*(mg/kg);PD1_change_schedule = time + 64*day;Cancer_mm_Start_Therapy = Cancer_mm_Start_Therapy*100;Time_Start_Therapy = time;TCytokineHoming = 100                     | CTLA4 and PD1 dosing                            |
| <b>Cancer_Diam_mm&gt;=Cancer_mm_Start_Therapy</b>                             | CTLA4mAb_Dose = CTLA4_DoseSet*(mg/kg);CTLA4_counter_on = time+0.0001*day;CTLA4_counter_off = CTLA4_counter_on + 0.0625*day;CTLA4_change_schedule = time + 64*day;PD1_counter_on = time+85.0001*day;PD1_counter_off = PD1_counter_on + 0.0416666*day;PD1mAb_Dose = PD1_DoseSet*(mg/kg);Cancer_mm_Start_Therapy = Cancer_mm_Start_Therapy*100;Time_Start_Therapy = time;TCytokineHoming = 100                                                        | CTLA4 then PD1 dosing                           |
| <b>Cancer_Diam_mm&gt;=Cancer_mm_Start_Therapy &amp;&amp; time&lt;=150*day</b> | PD1mAb_Dose = PD1_DoseSet*(mg/kg);PD1_counter_on = time+0.0001*day;PD1_counter_off = PD1_counter_on + 0.0416666*day;PD1_change_schedule = time + 71.0001*day;CTLA4_counter_on = time+85.0001*day;CTLA4_counter_off = CTLA4_counter_on + 0.0625*day;CTLA4_change_schedule = time + 64*day + 85.0001*day;CTLA4mAb_Dose = CTLA4_DoseSet*(mg/kg);Cancer_mm_Start_Therapy = Cancer_mm_Start_Therapy*100;Time_Start_Therapy = time;TCytokineHoming = 100 | PD1 then CTLA4 dosing; set CTLA4 and PD1 dosing |

| Trigger                                           | Event Functions                                                                                                                                                                                                                                                                                                                                                                                                                                                                                                                                                                              | Description                                                           |
|---------------------------------------------------|----------------------------------------------------------------------------------------------------------------------------------------------------------------------------------------------------------------------------------------------------------------------------------------------------------------------------------------------------------------------------------------------------------------------------------------------------------------------------------------------------------------------------------------------------------------------------------------------|-----------------------------------------------------------------------|
| <b>Cancer_Diam_mm&gt;=Cancer_mm_Start_Therapy</b> | PD1_counter_on = time+0.0001*day;PD1_counter_off = PD1_counter_on + 0.0416666*day;PD1mAb_Dose = PD1_DoseSet*(mg/kg);Cancer_mm_Start_Therapy = Cancer_mm_Start_Therapy*100;Time_Start_Therapy = time;TCytokineHoming = 100                                                                                                                                                                                                                                                                                                                                                                    | PD1 dosing                                                            |
| <b>Cancer_Diam_mm&gt;=Cancer_mm_Start_Therapy</b> | PDL1mAb_Dose = PDL1_DoseSet*(mg/kg);PD1mAb_Dose = PD1_DoseSet*(mg/kg);PDL1_counter_on = time+0.0001*day;PD1_counter_on = time+0.0001*day;PDL1_counter_off = PDL1_counter_on + 0.0416666*day;PD1_counter_off = PD1_counter_on + 0.0416666*day;Cancer_mm_Start_Therapy = Cancer_mm_Start_Therapy*100;Time_Start_Therapy = time;TCytokineHoming = 100                                                                                                                                                                                                                                           | PD1 and PDL1 dosing                                                   |
| <b>Cancer_Diam_mm&gt;=Cancer_mm_Start_Therapy</b> | PDL1_counter_on = time+0.0001*day;PDL1_counter_off = PDL1_counter_on + 0.0416666*day;PDL1mAb_Dose = PDL1_DoseSet*(mg/kg);Cancer_mm_Start_Therapy = Cancer_mm_Start_Therapy*100;Time_Start_Therapy = time;TCytokineHoming = 100                                                                                                                                                                                                                                                                                                                                                               | PDL1 dosing                                                           |
| <b>Cancer_Diam_mm&gt;=Cancer_mm_Start_Therapy</b> | CTLA4mAb_Dose = CTLA4_DoseSet*(mg/kg);CTLA4_counter_on = time+0.0001*day;CTLA4_counter_off = CTLA4_counter_on + 0.0625*day;CTLA4_change_schedule = time + 64*day;PDL1_counter_on = time+0.0001*day;PDL1_counter_off = PDL1_counter_on + 0.0416666*day;PDL1mAb_Dose = PDL1_DoseSet*(mg/kg);PDL1_change_schedule = time + 64*day;Cancer_mm_Start_Therapy = Cancer_mm_Start_Therapy*100;Time_Start_Therapy = time;TCytokineHoming = 100                                                                                                                                                         | CTLA4 and PDL1 dosing                                                 |
| <b>Cancer_Diam_mm&gt;=Cancer_mm_Start_Therapy</b> | CTLA4mAb_Dose = CTLA4_DoseSet*(mg/kg);CTLA4_counter_on = time+0.0001*day;CTLA4_counter_off = CTLA4_counter_on + 0.0625*day;CTLA4_change_schedule = time + 64*day;PDL1_counter_on = time+0.0001*day;PDL1_counter_off = PDL1_counter_on + 0.0416666*day;PDL1mAb_Dose = PDL1_DoseSet*(mg/kg);PDL1_change_schedule = time + 64*day;PD1_counter_on = time+0.0001*day;PD1_counter_off = PD1_counter_on + 0.0416666*day;PD1mAb_Dose = PD1_DoseSet*(mg/kg);PD1_change_schedule = time + 64*day;Cancer_mm_Start_Therapy = Cancer_mm_Start_Therapy*100;Time_Start_Therapy = time;TCytokineHoming = 100 | CTLA4, PD1 and PDL1 dosing                                            |
| <b>time&gt;=Time_Start_Therapy + 163*day</b>      | PD1mAb_New_Dose = PD1_DoseSet*(mg/kg);PD1_change_schedule = 2000*day;PD1mAb_Dose = PD1_DoseSet*(mg/kg);TCytokineHoming = 100                                                                                                                                                                                                                                                                                                                                                                                                                                                                 | PD1 then CTLA4 therapy: set delayed PD1 dosing                        |
| <b>Cancer_Diam_mm&gt;=Cancer_mm_Start_Therapy</b> | Time_Start_Therapy = time                                                                                                                                                                                                                                                                                                                                                                                                                                                                                                                                                                    | Time to start therapy once tumor diameter reaches a certain threshold |

Table S7 – Model Discontinuous Equation Sets (End)

Table S8 – Model Compartment Volumes (Start)

| Compartment | Variable | Volume      | Units | Reference | Description                                       |
|-------------|----------|-------------|-------|-----------|---------------------------------------------------|
| Blood-Lymph | Vc_CTLA4 | 2.727814034 | liter | [15]      | Volume of the central compartment for Anti-CTLA-4 |
| Blood-Lymph | Vc_PD1   | 2.716739643 | liter | [25]      | Volume of the central compartment for Anti-PD-1   |
| Blood-Lymph | Vc_PDL1  | 4.051599814 | liter | [26, 27]  | Volume of the central compartment for Anti-PD-L1  |

| Compartment        | Variable    | Volume                                  | Units | Reference                      | Description                                                                                       |
|--------------------|-------------|-----------------------------------------|-------|--------------------------------|---------------------------------------------------------------------------------------------------|
| <b>Blood-Lymph</b> | Vc_Teff     | 2.7                                     | liter | [13, 93]                       | Volume of blood through which Effector T cells circulate throughout the body                      |
| <b>Liv_Spln_GI</b> | Vv_GI       | 43                                      | ml    | [13]                           | Vasculature volume of GI for Effector T cell trafficking                                          |
| <b>Liv_Spln_GI</b> | Vext_Liver  | 361.8                                   | ml    | [13]                           | Volume of Liver interstitium for Effector T cell trafficking                                      |
| <b>Liv_Spln_GI</b> | Vv_Liver    | 180.9                                   | ml    | [13]                           | Vasculature volume of Liver for Effector T cell trafficking                                       |
| <b>Liv_Spln_GI</b> | Vext_Spleen | 34.7                                    | ml    | [13]                           | Volume of Spleen interstitium for Effector T cell trafficking                                     |
| <b>Liv_Spln_GI</b> | Vv_Spleen   | 17                                      | ml    | [13]                           | Vasculature volume of Spleen for Effector T cell trafficking                                      |
| <b>Lungs</b>       | Vext_Lungs  | 299.7                                   | ml    | [13]                           | Volume of Lungs interstitium for Effector T cell trafficking                                      |
| <b>Lungs</b>       | Vv_Lungs    | 99.9                                    | ml    | [13]                           | Vasculature volume of Lungs for Effector T cell trafficking                                       |
| <b>Lymph_Node</b>  | Vext_LN     | 34.7                                    | ml    | [13]                           | Volume of Lymph Node interstitium for Effector T cell trafficking                                 |
| <b>Lymph_Node</b>  | VL          | 5.2                                     | liter | [56, 94]                       | Volume of total Lymph for antibody PK                                                             |
| <b>Lymph_Node</b>  | Vtdln       | 5.2                                     | liter | [56, 94]                       | Volume of total Lymph for antibody PK                                                             |
| <b>Lymph_Node</b>  | Vv_LN       | 17                                      | ml    | [13]                           | Vasculature volume of Lymph Node for Effector T cell trafficking                                  |
| <b>Peripheral</b>  | ISF         | 15.9                                    | liter | [56]                           | Volume of interstitial fluid (ISF) is tissues for antibody PK                                     |
| <b>Peripheral</b>  | Vv_Periph   | 1355.4                                  | ml    | [13]                           | Vasculature volume of Peripheral (other tissue not accounted for) for Effector T cell trafficking |
| <b>Tumor</b>       | Vex_Tmr     | ~50% (void space) of total tumor volume | ml    | [13]<br>Calculated dynamically | Volume of Tumor interstitium                                                                      |
| <b>Tumor</b>       | Vt_Teff     | Based on Cancer_Vol_cm3                 | liter | Calculated dynamically         | Total tumor volume calculated from cancer cell number, void space and tumor vasculature           |
| <b>Tumor</b>       | Vv_Tmr      | ~7% of total tumor volume               | ml    | [13]<br>Calculated dynamically | Vasculature volume of Tumor based on fraction of total tumor volume                               |

Table S8 – Model Compartment Volumes (End)

Table S9 – Parameters Varied in Virtual Clinical Trials (Start)

| Parameter Name in Model        | Value Range                                                                | Units         | Source                                          | Description                                                                                                                                                                                                         |
|--------------------------------|----------------------------------------------------------------------------|---------------|-------------------------------------------------|---------------------------------------------------------------------------------------------------------------------------------------------------------------------------------------------------------------------|
| <b>%PDL1_Exp_Cancer</b>        | 40-90;<br>Median: 75                                                       | dimensionless | [11]                                            | Percent of cancer cells of total cancer cells that are PD-L1 positive that interact with the Effector T cells in the tumor compartment.                                                                             |
| <b>%T_Tregs_per_Cancer</b>     | 0-0.25;<br>Median: 0.13                                                    | dimensionless | Assumed as recruited by tumor                   | Defines the percentage of Regulatory T cells in the tumor compartment as a percent of total tumor cells.                                                                                                            |
| <b>%_Tr_LN</b>                 | 5-35;<br>Median: 20                                                        | dimensionless | [1, 3-5]                                        | Percent Regulatory T cells of total T cells in each lymph node.                                                                                                                                                     |
| <b>Antigen_Intensity</b>       | Assigned from 0.8-1.0 for melanoma (on a scale of 0.1-1.0);<br>Median: 0.9 | dimensionless | Upper range of cancer types<br>[14]             | Defines the strength of the TAA/TSA that are involved in priming of the T cells in the lymph nodes. Also known as antigen strength.                                                                                 |
| <b>AntSpread</b>               | x = 2 (Where it is used as 10 <sup>x</sup> )                               | dimensionless | Estimated during fitting to anti-PD-1 data      | Sets the number of TAA/TSA released per cancer cell upon natural death and decay or following cytotoxic killing. The value is used to set a multiple of cancer cells in the formation of debris for APC maturation. |
| <b>Cancer_mm_Start_Therapy</b> | 15-80;<br>Median: 40                                                       | mm            | Approximated based on reported literature range | Diameter of the tumor when to start the therapeutic regimen.                                                                                                                                                        |
| <b>Chemokine</b>               | 100                                                                        | dimensionless | Estimated during fitting to anti-PD-1 data      | The chemokine factor to promote extravasation of effector T cells into the tumor.                                                                                                                                   |

| Parameter Name in Model  | Value Range           | Units | Source       | Description                                                                                                                                           |
|--------------------------|-----------------------|-------|--------------|-------------------------------------------------------------------------------------------------------------------------------------------------------|
| <b>T_Cell_Cloneality</b> | 10-130;<br>Median: 70 | cell  | [28, 30, 85] | Number of Naïve T cells populations specific for different tumor antigens; in other words; the number of anti-tumor T cell clones in each lymph node. |

**Table S9 – Parameters Varied in Virtual Clinical Trials (End)**

**Table S10 – Parameters Varied in Sensitivity Analysis (Start)**

| Parameter Name in Model        | Value Range                                                | Units         | Source                                                                     | Description                                                                                                                                                                                                         |
|--------------------------------|------------------------------------------------------------|---------------|----------------------------------------------------------------------------|---------------------------------------------------------------------------------------------------------------------------------------------------------------------------------------------------------------------|
| <b>%CD80_Exp_Cancer</b>        | 1-100                                                      | dimensionless | [6-8]                                                                      | Percent of cancer cells of total cancer cells that are CD80 positive that interact with the Effector T cells in the tumor compartment.                                                                              |
| <b>%PD1_Exp_Cancer</b>         | 1-100                                                      | dimensionless | [9]                                                                        | Percent of cancer cells of total cancer cells that are PD-1 positive that interact with the Effector T cells in the tumor compartment.                                                                              |
| <b>%PDL1_Exp_Cancer</b>        | 1-100                                                      | dimensionless | [11]                                                                       | Percent of cancer cells of total cancer cells that are PD-L1 positive that interact with the Effector T cells in the tumor compartment.                                                                             |
| <b>%PDL2_Exp_Cancer</b>        | 1-100                                                      | dimensionless | [12]                                                                       | Percent of cancer cells of total cancer cells that are PD-L2 positive that interact with the Effector T cells in the tumor compartment.                                                                             |
| <b>%T_Tregs_per_Cancer</b>     | 0-0.25                                                     | dimensionless | Assumed as recruited by tumor                                              | Defines the percentage of Regulatory T cells in the tumor compartment as a percent of total tumor cells.                                                                                                            |
| <b>%_Tr_LN</b>                 | 5-35                                                       | dimensionless | [1, 3-5]                                                                   | Percent Regulatory T cells of total T cells in each lymph node.                                                                                                                                                     |
| <b>Antigen_Intensity</b>       | Assigned from 0.8-1.0 for melanoma (on a scale of 0.1-1.0) | dimensionless | Upper range of cancer types [14]                                           | Defines the strength of the TAA/TSA that are involved in priming of the T cells in the lymph nodes. Also known as antigen strength.                                                                                 |
| <b>AntSpread</b>               | x = 1-5 (Where it is used as 10 <sup>x</sup> )             | dimensionless | Estimated during fitting to anti-PD-1 data and varied across range         | Sets the number of TAA/TSA released per cancer cell upon natural death and decay or following cytotoxic killing. The value is used to set a multiple of cancer cells in the formation of debris for APC maturation. |
| <b>Cancer_mm_Start_Therapy</b> | 5-80                                                       | mm            | Assigned based on reported literature range                                | Longest diameter of the tumor when to start the therapeutic regimen.                                                                                                                                                |
| <b>Chemokine</b>               | 50-500                                                     | dimensionless | Estimated during anti-PD-1 therapy fitting; varied in sensitivity analysis | The chemokine factor to promote extravasation of effector T cells into the tumor.                                                                                                                                   |
| <b>CTLA4_DoseSet</b>           | 0.3-10                                                     | mg/kg         | Based on regimen                                                           | Dose of anti-CTLA-4 therapy                                                                                                                                                                                         |
| <b>mAPC_activation_level</b>   | 0.1-1.0                                                    | dimensionless | [13]                                                                       | The fraction of CD80 and CD86 expression on the mAPCs from 0.1-1.                                                                                                                                                   |
| <b>mAPC_Debis_T_Inact</b>      | 0.05-0.95                                                  | dimensionless | Varied across range (5-95%) and estimated during fitting to anti-PD-1 data | The fraction of tumor debris that is considered to not be transported to the lymph nodes and is removed from the system.                                                                                            |
| <b>PD1_DoseSet</b>             | 0.03-2                                                     | mg/kg         | Based on regimen                                                           | Dose administered of anti-PD-1 therapy.                                                                                                                                                                             |
| <b>PDL1_DoseSet</b>            | 0.003-0.1                                                  | mg/kg         | Based on regimen                                                           | Dose administered of anti-PD-L1 therapy.                                                                                                                                                                            |
| <b>Rate_Tumor_Growth</b>       | 64-144 day doubling time                                   | 1/day         | [81]                                                                       | Proliferation rate of cancer cells that defines the volumetric doubling time of the tumor.<br>64 day metastatic doubling: 0.010955675075414<br>144 day non-metastatic doubling: 0.004913635262592.                  |



| Parameter Name in Model | Value Range | Units | Source       | Description                                                                                                                                           |
|-------------------------|-------------|-------|--------------|-------------------------------------------------------------------------------------------------------------------------------------------------------|
| T_Cell_Clontology       | 5-130       | cell  | [28, 30, 85] | Number of Naïve T cells populations specific for different tumor antigens; in other words; the number of anti-tumor T cell clones in each lymph node. |

Table S10 Parameters Varied in Sensitivity Analysis (End)

Table S11 – Conditions Specific to Each Clinical Scenario Simulated (Start)

| Fig . | Tiral                                        | Dose/Regimen                                                                                                                                                  | Patients Simulated | Parameter ranges and medians                                                                                                                       |
|-------|----------------------------------------------|---------------------------------------------------------------------------------------------------------------------------------------------------------------|--------------------|----------------------------------------------------------------------------------------------------------------------------------------------------|
| 2     | Anti-PD-1                                    | 3 mg/kg, Q2W                                                                                                                                                  | 200                | Same for all simulations: Table S9 for references and ranges. Latin Hypercube Sampling (LHS) with equal distribution was utilized for simulations. |
| 3     | Anti-PD-1 with Anti-CTLA-4                   | 3 mg/kg anti-CTLA-4 and 1 mg/kg anti-PD-1 Q3W, 4 doses combo; while anti-PD-1, 8 doses; then, combo Q12W                                                      | 47                 |                                                                                                                                                    |
| 4     | Anti-PD-L1                                   | 20 mg/kg, Q2W                                                                                                                                                 | 200                |                                                                                                                                                    |
| 5     | Anti-PD-1 and Anti-CTLA-4 Sequential Therapy | 3 mg/kg anti-CTLA-4 and 3 mg/kg anti-PD-1<br>a) Q3W anti-CTLA-4, 4 doses; Q2W anti-PD-1<br>b) Q2W anti-PD-1, 6 doses; Q3W anti-CTLA-4, 4 doses; Q2W anti-PD-1 | 200                |                                                                                                                                                    |
| S1    | Anti-CTLA-4                                  | 3 and 10 mg/kg, Q3W, 4 doses; then, Q12W                                                                                                                      | 200                |                                                                                                                                                    |
| S2    | Anti-PD-L1 with Anti-CTLA-4                  | 1 mg/kg anti-CTLA-4 and 20 mg/kg anti-PD-L1 Q3W, 4 doses combo; anti-PD-L1 Q2W                                                                                | 200                |                                                                                                                                                    |
| S3    | Anti-PD-1 with Anti-PD-L1                    | 3 mg/kg anti-PD-1 and 20 mg/kg anti-PD-L1, Q2W                                                                                                                | 200                |                                                                                                                                                    |

Table S11 – Conditions Specific to Each Clinical Scenario Simulated (End)

## References:

1. Battaglia, A., et al., *Lymphocyte populations in human lymph nodes. Alterations in CD4+ CD25+ T regulatory cell phenotype and T-cell receptor Vβ repertoire*. Immunology, 2003. **110**(3): p. 304-12.
2. Backteman, K., et al., *Lymphocyte subpopulations in lymph nodes and peripheral blood: a comparison between patients with stable angina and acute coronary syndrome*. PLoS One, 2012. **7**(3): p. e32691.
3. Höfer, T., O. Krichevsky, and G. Altan-Bonnet, *Competition for IL-2 between Regulatory and Effector T Cells to Chisel Immune Responses*. Front Immunol., 2012. **3**: p. 1-9.
4. Viguer, M., et al., *Foxp3 Expressing CD4+CD25high Regulatory T Cells Are Overrepresented in Human Metastatic Melanoma Lymph Nodes and Inhibit the Function of Infiltrating T Cells*. J Immunol., 2004. **173**(2): p. 1444-53.
5. Jandus, C., et al., *Selective accumulation of differentiated FOXP3+ CD4+ T cells in metastatic tumor lesions from melanoma patients compared to peripheral blood*. Cancer Immunol Immunother., 2008. **57**(12): p. 1795-805.
6. Tirapu, I., et al., *Low surface expression of B7-1 (CD80) is an immunoescape mechanism of colon carcinoma*. Cancer Res., 2006. **66**(4): p. 2442-50.
7. *CD80 in Melanoma*. 2015; Available from: <http://www.proteinatlas.org/ENSG00000121594-CD80/cancer/tissue/melanoma>.
8. Uhlén, M., et al., *Proteomics. Tissue-based map of the human proteome*. Science, 2015. **347**(6220): p. 1260419.

9. Kleffel, S., et al., *Melanoma cell-intrinsic PD-1 receptor functions promote tumor growth*. Cell, 2015. **162**(6): p. 1242-56.
10. Chemnitz, J.M., et al., *SHP-1 and SHP-2 associate with immunoreceptor tyrosine-based switch motif of programmed death 1 upon primary human T cell stimulation, but only receptor ligation prevents T cell activation*. J Immunol., 2004. **173**(2): p. 945-54.
11. Madore, J., et al., *PD-L1 expression in melanoma shows marked heterogeneity within and between patients: implications for anti-PD-1/PD-L1 clinical trials*. Pigment Cell Melanoma Res., 2015. **28**(3): p. 245-53.
12. Obeid, J.M., et al., *PD-L1, PD-L2 and PD-1 expression in metastatic melanoma: Correlation with tumor-infiltrating immune cells and clinical outcome*. Oncoimmunology, 2016. **5**(11): p. e1235107.
13. Zhu, H., et al., *Physiologically based kinetic model of effector cell biodistribution in mammals: implications for adoptive immunotherapy*. Cancer Res., 1996. **56**(16): p. 3771-81.
14. Yarchoan, M., A. Hopkins, and E.M. Jaffee, *Tumor Mutational Burden and Response Rate to PD-1 Inhibition*. N Engl J Med., 2017. **377**(25): p. 2500-2501.
15. Feng, Y., et al., *Model-based clinical pharmacology profiling of ipilimumab in patients with advanced melanoma*. Br J Clin Pharmacol., 2014. **78**(1): p. 106-17.
16. Lyng, H., O. Haraldseth, and E.K. Rofstad, *Measurement of Cell Density and Necrotic Fraction in Human Melanoma Xenografts by Diffusion Weighted Magnetic Resonance Imaging*. Magn Reson Med., 2000. **43**(6): p. 828-36.
17. Thurber, G.M., M.M. Schmidt, and K.D. Wittrup, *Antibody tumor penetration: transport opposed by systemic and antigen-mediated clearance*. Adv Drug Deliv Rev., 2008. **60**(12): p. 1421-34.
18. Ritter, A.T., et al., *Actin Depletion Initiates Events Leading to Granule Secretion at the Immunological Synapse*. Immunity, 2015. **42**(5): p. 864-76.
19. Miller, M.J., et al., *T cell repertoire scanning is promoted by dynamic dendritic cell behavior and random T cell motility in the lymph node*. Proc Natl Acad Sci U S A., 2004. **101**(4): p. 998-1003.
20. Mrass, P., et al., *Random migration precedes stable target cell interactions of tumor-infiltrating T cells*. J Exp Med., 2006. **203**(12): p. 2749-61.
21. Ewa Bryl, et al., *Modulation of CD28 expression with anti-tumor necrosis factor alpha therapy in rheumatoid arthritis*. Arthritis Rheum., 2005. **52**(10): p. 2996-3003.
22. Unternaehrer, J.J., et al., *The tetraspanin CD9 mediates lateral association of MHC class II molecules on the dendritic cell surface*. Proc Natl Acad Sci U S A., 2007. **104**(1): p. 234-9.
23. Haile, S.T., et al., *Tumor Cell Programmed Death Ligand 1-Mediated T Cell Suppression Is Overcome by Coexpression of CD80*. J Immunol., 2011. **186**(12): p. 6822-9.
24. Tatari-Calderone, Z., et al., *Acquisition of CD80 by human T cells at early stages of activation: functional involvement of CD80 acquisition in T cell to T cell interaction*. J Immunol., 2002. **169**(11): p. 6162-9.
25. BMS, *Clinical Pharmacology BLA Review - Opdivo (nivolumab)*. 2014, CENTER FOR DRUG EVALUATION AND RESEARCH (CDER): CLINICAL PHARMACOLOGY AND BIOPHARMACEUTICS REVIEW(S). p. 1-28.
26. Cogswell, J.P., et al., *Cancer immunotherapy by disrupting pd-1/pd-l1 signaling*. 2013, Google Patents.
27. Deng, R., et al., *Preclinical pharmacokinetics, pharmacodynamics, tissue distribution, and tumor penetration of anti-PD-L1 monoclonal antibody, an immune checkpoint inhibitor*. MAbs, 2016. **8**(3): p. 593-603.
28. Qia, Q., et al., *Diversity and clonal selection in the human T-cell repertoire*. Proc Natl Acad Sci U S A., 2014. **111**(36): p. 13139-44.

29. Jenkins, M.K. and J.J. Moon, *The Role of Naive T Cell Precursor Frequency and Recruitment in Dictating Immune Response Magnitude*. J Immunol., 2012. **188**(9): p. 4135-40.
30. Zarnitsyna, V.I., et al., *Estimating the diversity, completeness, and cross-reactivity of the T cell repertoire*. Front Immunol., 2013. **4**.
31. Egen, J.G. and J.P. Allison, *Cytotoxic T Lymphocyte Antigen-4 Accumulation in the Immunological Synapse Is Regulated by TCR Signal Strength*. Immunity, 2002. **16**(1): p. 23-35.
32. Linsley, P.S., et al., *Coexpression and functional cooperation of CTLA-4 and CD28 on activated T lymphocytes*. J Exp Med., 1992. **176**(6): p. 1595-604.
33. Read S, G.R., Izcue A, Robinson N, Mandelbrot D, Francisco L, Sharpe AH, Powrie F, *Blockade of CTLA-4 on CD4+CD25+ regulatory T cells abrogates their function in vivo*. J Immunol., 2006. **177**(7): p. 4376-83.
34. Palssson, S., et al., *The development of a fully-integrated immune response model (FIRM) simulator of the immune response through integration of multiple subset models*. BMC Syst Biol., 2013. **7**.
35. De Boer RJ, H.P., Dullens HF, De Weger RA, Den Otter W., *Macrophage T lymphocyte interactions in the anti-tumor immune response: a mathematical model*. J Immunol., 1985. **134**(4): p. 2748-58.
36. Kanehisa, M., et al., *KEGG: new perspectives on genomes, pathways, diseases and drugs*. Nucleic Acids Res., 2017. **45**(D1): p. D353-D361.
37. Kanehisa, M., et al., *KEGG as a reference resource for gene and protein annotation*. Nucleic Acids Res., 2016. **44**(D1): p. D457-62.
38. Kanehisa, M. and S. Goto, *KEGG: kyoto encyclopedia of genes and genomes*. Nucleic Acids Res., 2000. **28**(1): p. 27-30.
39. Wikipedia contributors. *Durvalumab*. 2016 8 December 2016 18:37 UTC; Available from: <https://en.wikipedia.org/wiki/Durvalumab>.
40. Henrickson, S.E., et al., *T cell sensing of antigen dose governs interactive behavior with dendritic cells and sets a threshold for T cell activation*. Nat Immunol., 2008. **9**(3): p. 282-291.
41. Marino, S. and D.E. Kirschner, *The human immune response to Mycobacterium tuberculosis in lung and lymph node*. J Theor Biol., 2004. **227**(4): p. 463-86.
42. Klebanoff, C.A., L. Gattinoni, and N.P. Restif, *CD8+ T-cell memory in tumor immunology and immunotherapy*. Immunol Rev., 2006. **211**: p. 214-24.
43. Northrop, J.K. and H. Shen, *CD8+ T-cell memory: only the good ones last*. Curr Opin Immunol., 2004. **16**(4): p. 451-5.
44. Macallan, D.C., et al., *Rapid Turnover of Effector–Memory CD4+ T Cells in Healthy Humans*. J Exp Med., 2004. **200**(2): p. 255-60.
45. De Boer RJ, et al., *Turnover rates of B cells, T cells, and NK cells in simian immunodeficiency virus-infected and uninfected rhesus macaques*. J Immunol., 2003. **170**(5): p. 2479-87.
46. Qureshi, O.S., et al., *Constitutive Clathrin-mediated Endocytosis of CTLA-4 Persists during T Cell Activation*. J Biol Chem., 2012. **287**(12): p. 9429-40.
47. Kaur, S., O.S. Qureshi, and D.M. Sansom, *Comparison of the Intracellular Trafficking Itinerary of CTLA-4 Orthologues*. PLoS One, 2013. **8**(4): p. e60903.
48. Pentcheva-Hoang, T., et al., *Programmed death-1 concentration at the immunological synapse is determined by ligand affinity and availability*. Proc Natl Acad Sci U S A., 2007. **104**(45): p. 17765-70.
49. Linsley, P.S., et al., *Intracellular Trafficking of CTLA-4 and Focal Localization Towards Sites of TCR Engagement*. Immunity, 1996. **4**(6): p. 535-43.
50. Jafarnejad, M., et al., *Modeling Lymph Flow and Fluid Exchange with Blood Vessels in Lymph Nodes*. Lymphat Res Biol., 2015. **13**(4): p. 234-247.

51. Pillis, L.G.d., A.E. Radunskaya, and C.L. Wiseman, *A validated mathematical model of cell-mediated immune response to tumor growth*. *Cancer Res.*, 2005. **65**(17): p. 7950-8.
52. Patel, S.P. and S.E. Woodman, *Profile of ipilimumab and its role in the treatment of metastatic melanoma*. *Drug Des Devel Ther.*, 2011. **5**: p. 489-95.
53. Wikipedia contributors. *Ipilimumab*. 2017 26 February 2017 03:23 UTC; Available from: <https://en.wikipedia.org/w/index.php?title=Ipilimumab&oldid=767469815>.
54. Wild, M.K., et al., *Dependence of T Cell Antigen Recognition on the Dimensions of an Accessory Receptor–Ligand Complex*. *J Exp Med.*, 1999. **190**(1): p. 31-41.
55. Burroughs, N.J. and C. Wulfing, *Differential Segregation in a Cell-Cell Contact Interface: The Dynamics of the Immunological Synapse*. *Biophys J.*, 2002. **83**(4): p. 1784-96.
56. Cao, Y., J.P. Balthasar, and W.J. Jusko, *Second-generation minimal physiologically-based pharmacokinetic model for monoclonal antibodies*. *J Pharmacokinetic Pharmacodyn.*, 2013. **40**(5): p. 597-607.
57. Ruedl C, K.P., Bachmann M, Hess M, Karjalainen K., *Anatomical origin of dendritic cells determines their life span in peripheral lymph nodes*. 165, 2000. **9**(4910-6).
58. Domínguez PM, A.C., *Differentiation and function of mouse monocyte-derived dendritic cells in steady state and inflammation*. *Immunol Rev.*, 2010. **234**(1): p. 90-104.
59. Henrickson, S.E., et al., *In vivo imaging of T cell priming*. *Sci Signal*, 2008. **1**(12): p. pt2.
60. Mempel, T.R., S.E. Henrickson, and U.H.v. Andrian, *T-cell priming by dendritic cells in lymph nodes occurs in three distinct phases*. *Nature*, 2004. **427**(6970): p. 154-9.
61. Stoll, S., et al., *Dynamic imaging of T cell-dendritic cell interactions in lymph nodes*. *Science*, 2002. **296**(5574): p. 1873-6.
62. Miller, M.J., et al., *Imaging the Single Cell Dynamics of CD4+ T Cell Activation by Dendritic Cells in Lymph Nodes*. *J Exp Med.*, 2004. **200**(7): p. 847-56.
63. Baverel, P.G., et al., *Population Pharmacokinetics of Durvalumab in Cancer Patients and Association With Longitudinal Biomarkers of Disease Status*. *Clin Pharmacol Ther.*, 2018. **103**(4): p. 631-642.
64. Collins, A.V., et al., *The Interaction Properties of Costimulatory Molecules Revisited*. *Immunity*, 2002. **17**(2): p. 201-10.
65. EMA, *Assessment Report For Yervoy (ipilimumab)* 2011, European Medicines Agency (EMA)/Committee for Medicinal Products for Human Use (CHMP).
66. Cheng, X., et al., *Structure and Interactions of the Human Programmed Cell Death 1 Receptor*. *J Biol Chem.*, 2013. **288**(17): p. 11771-85.
67. EMA, *Nivolumab BMS, INN-nivolumab*. 2015, European Medicines Agency (EMA)/Committee for Medicinal Products for Human Use (CHMP).
68. Finley, S.D., et al., *Pharmacokinetics and pharmacodynamics of VEGF-neutralizing antibodies*. *BMC Syst Biol.*, 2011. **5**.
69. Norbury, C.C., et al., *Visualizing priming of virus-specific CD8+ T cells by infected dendritic cells in vivo*. *Nat Immunol.*, 2002. **3**(3): p. 265-71.
70. Haghghi, H.R., et al., *Identification of a Dual-Specific T Cell Epitope of the Hemagglutinin Antigen of an H5 Avian Influenza Virus in Chickens*. *PLoS ONE*, 2009. **4**(11): p. e7772.
71. Sims, T.N., et al., *Opposing effects of PKCtheta and WASp on symmetry breaking and relocation of the immunological synapse*. *Cell*, 2007. **129**(4): p. 773-85.
72. Celli, S., et al., *How many dendritic cells are required to initiate a T-cell response?* *Blood*, 2012. **120**(19): p. 3945-8.
73. Currana, M.A., et al., *PD-1 and CTLA-4 combination blockade expands infiltrating T cells and reduces regulatory T and myeloid cells within B16 melanoma tumors*. *Proc Natl Acad Sci U S A.*, 2010. **107**(9): p. 4275-80.

74. Wikipedia contributors. *Nivolumab*. 2017 27 February 2017 13:59 UTC; Available from: <https://en.wikipedia.org/wiki/Nivolumab>.
75. Farzad, Z., et al., *Lymphocyte subset alterations in nodes regional to human melanoma*. *Cancer Res.*, 1990. **50**(12): p. 3585-8.
76. Willard-Mack, C.L., *Normal Structure, Function, and Histology of Lymph Nodes*. *Toxicol Pathol.*, 2006. **34**(5): p. 409-24.
77. Native American Cancer Research (NACR). *Introduction to Lymphedema Branch*. 2016; Available from: <http://natamcancer.org/lymphedema-intro.html>.
78. Wikipedia contributors. *List of lymph nodes of the human body*. 2016 11 December 2016 00:14 UTC; Available from: [https://en.wikipedia.org/wiki/List\\_of\\_lymph\\_nodes\\_of\\_the\\_human\\_body](https://en.wikipedia.org/wiki/List_of_lymph_nodes_of_the_human_body).
79. Bousso, P. and E. Robey, *Dynamics of CD8+ T cell priming by dendritic cells in intact lymph nodes*. *Nat Immunol.*, 2003. **4**(6): p. 579-85.
80. Lee, K.-H., et al., *T cell receptor signaling precedes immunological synapse formation*. *Science*, 2002. **295**(5559): p. 1539-42.
81. Carlson, J.A., *Tumor doubling time of cutaneous melanoma and its metastasis*. *Am J Dermatopathol.*, 2003. **25**(4): p. 291-9.
82. Bousso, P., *T-cell activation by dendritic cells in the lymph node: lessons from the movies*. *Nat Rev Immunol.*, 2008. **8**(9): p. 675-84.
83. Obst, R., *The timing of T cell priming and cycling*. *Front Immunol.*, 2015. **6**.
84. Castellino, F., et al., *Chemokines enhance immunity by guiding naive CD81 T cells to sites of CD41 T cell–dendritic cell interaction*. *Nature*, 2006. **440**(7086): p. 890-5.
85. Tumei, P.C., et al., *PD-1 blockade induces responses by inhibiting adaptive immune resistance*. *Nature*, 2014. **515**(7528): p. 568-71.
86. Miller, M.J., et al., *Two-Photon Imaging of Lymphocyte Motility and Antigen Response in Intact Lymph Node*. *Science*, 2002. **296**(5574): p. 1869-73.
87. Baey, A.d. and A. Lanzavecchia, *The role of aquaporins in dendritic cell macropinocytosis*. *J Exp Med.*, 2000. **191**(4): p. 743-8.
88. Sallusto, F., et al., *Dendritic cells use macropinocytosis and the mannose receptor to concentrate macromolecules in the major histocompatibility complex class II compartment: downregulation by cytokines and bacterial products*. *J Exp Med.*, 1995. **182**(2): p. 389-400.
89. Matheu, M.P., et al., *Imaging regulatory T cell dynamics and suppression of T cell priming mediated by CTLA4*. *Nat Commun.*, 2015. **6**: p. 6219.
90. Papatriantafyllou, M., *Trafficking: Effector T cells cross the line*. *Nat Rev Immunol.*, 2011. **12**(2): p. 74.
91. Shulman, Z., et al., *Transendothelial migration of lymphocytes mediated by intraendothelial vesicle stores rather than by extracellular chemokine depots*. *Nat Immunol.*, 2011. **13**(1): p. 67-76.
92. Voss, B., et al., *Tumor Volume as a Prognostic Factor in Resectable Malignant Melanoma*. *Dermatology*, 2014. **228**(1): p. 66-70.
93. Dean, L., *Chapter 1, Blood and the cells it contains*, in *Blood Groups and Red Cell Antigens*. 2005, Bethesda (MD): National Center for Biotechnology Information (US): Internet.
94. Baldazzi, V., et al., *Modeling lymphocyte homing and encounters in lymph nodes*. *BMC Bioinformatics*, 2009. **10**: p. 1-11.

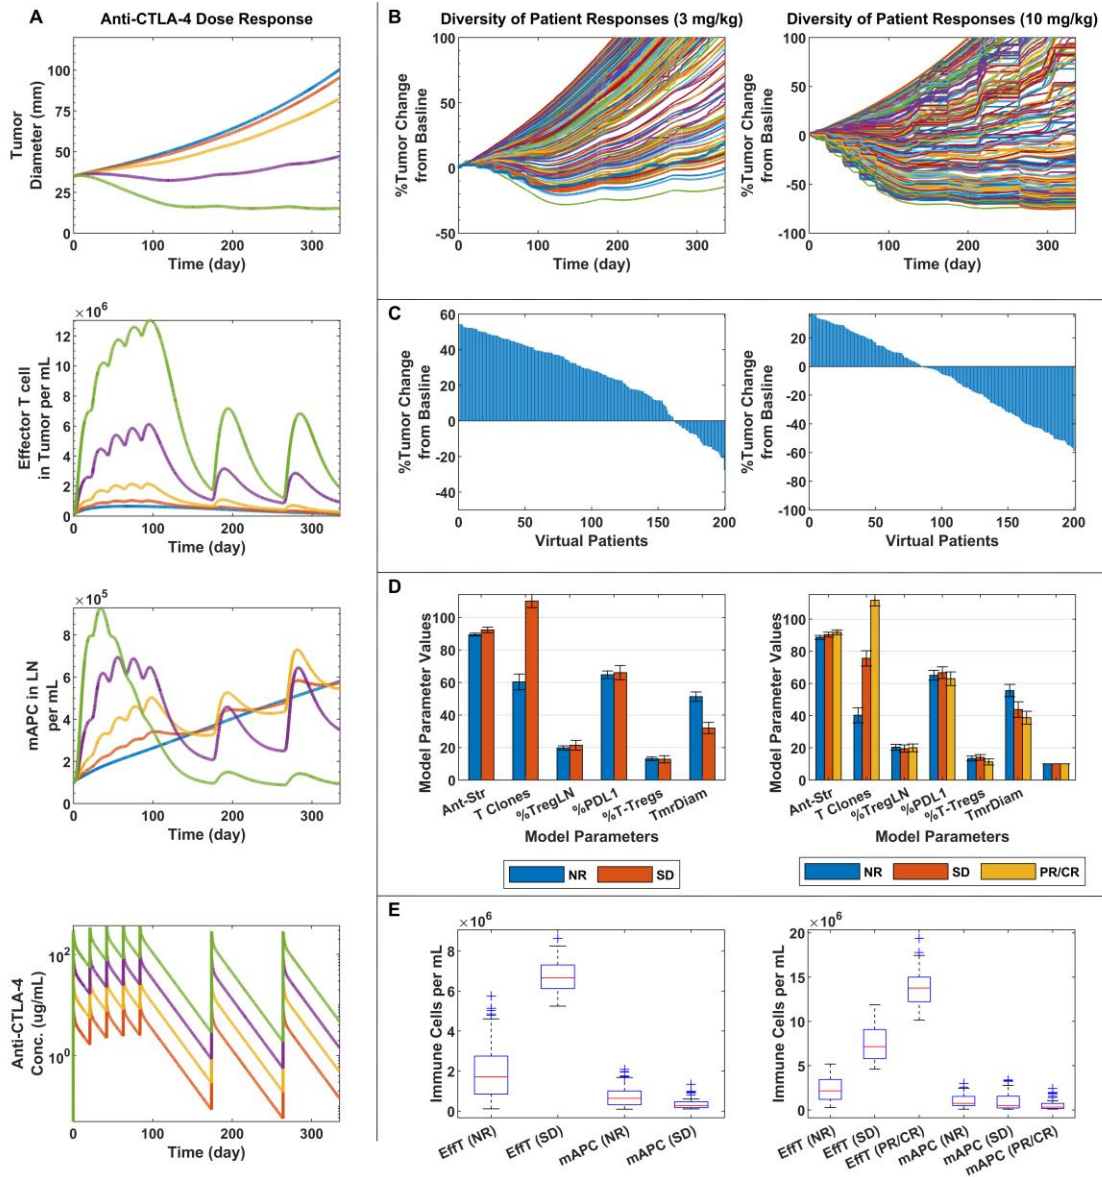

**Figure S1. Dose response anti-CTLA-4 mono-therapy. A)** From top to bottom: Tumor response to anti-CTLA-4 therapy at doses of 0.3, 1, 3 and 10 mg/kg as represented by the colors in the bottom figure in ascending order; the blue line indicates no therapy in the top figure. Then, Effector T cell density in the tumor (second from the top), mAPC density in the lymph nodes (third from the top) and finally, the PK of anti-CTLA-4 at the given doses. **B)** Diversity of tumor response for 3 mg/kg (left) and 10 mg/kg (right). **C)** Waterfall plot of VPs at 3 mg/kg (left) and 10 mg/kg (right). **D)** Bar graph comparison parameters varied in model for each type of responder at 3 mg/kg (left) and 10 mg/kg (right). **E)** Max Effector T cell density in the tumor and average mAPC density in the lymph nodes for each responder category at 3 mg/kg (left) and 10 mg/kg (right).

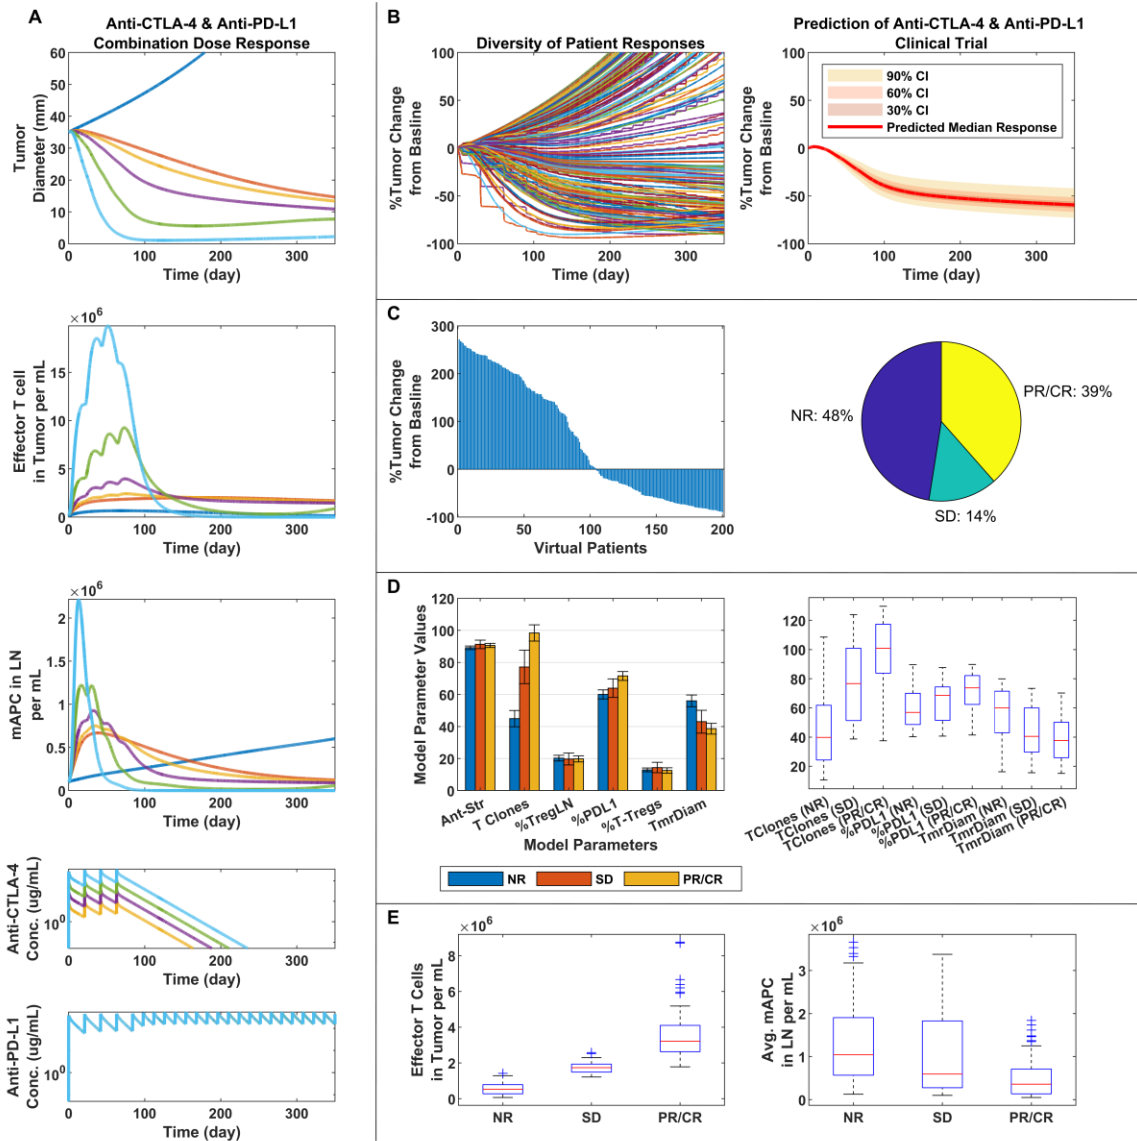

**Figure S2. Dose response and clinical validation of anti-CTLA-4/anti-PD-L1 combo-therapy.** **A)** From top to bottom: Tumor response to combination therapy at doses of 0.3, 1, 3 and 10 mg/kg of anti-CTLA-4, as represented by the colors in the second from the bottom figure in ascending order and 20 mg/kg for anti-PD-L1 was used for all simulations; the blue line indicates no therapy (top figure), and orange indicates only anti-PD-L1. Then, Effector T cell density in the tumor (second from the top), mAPC density in the lymph nodes (third from the top) and finally, the PK of anti-CTLA-4 and lastly, anti-PD-L1 at the given doses. For all following figures, 20 mg/kg anti-PD-L1 and 1 mg/kg anti-CTLA-4 were used, following the same regimen. **B)** Diversity of tumor response (left), prediction of median clinical response data (right). **C)** Waterfall plot of VPs (left) and pie chart (right) with percent of virtual non-responders (NR), stable disease (SD) and partial or complete responders (PR/CR). **D)** Bar graph comparison parameters varied in model for each responder type (left) and box plots of significant differentiators (right). **E)** Max

Effector T cell density in the tumor (left) and average mAPC density in the lymph nodes (right) for each responder category.

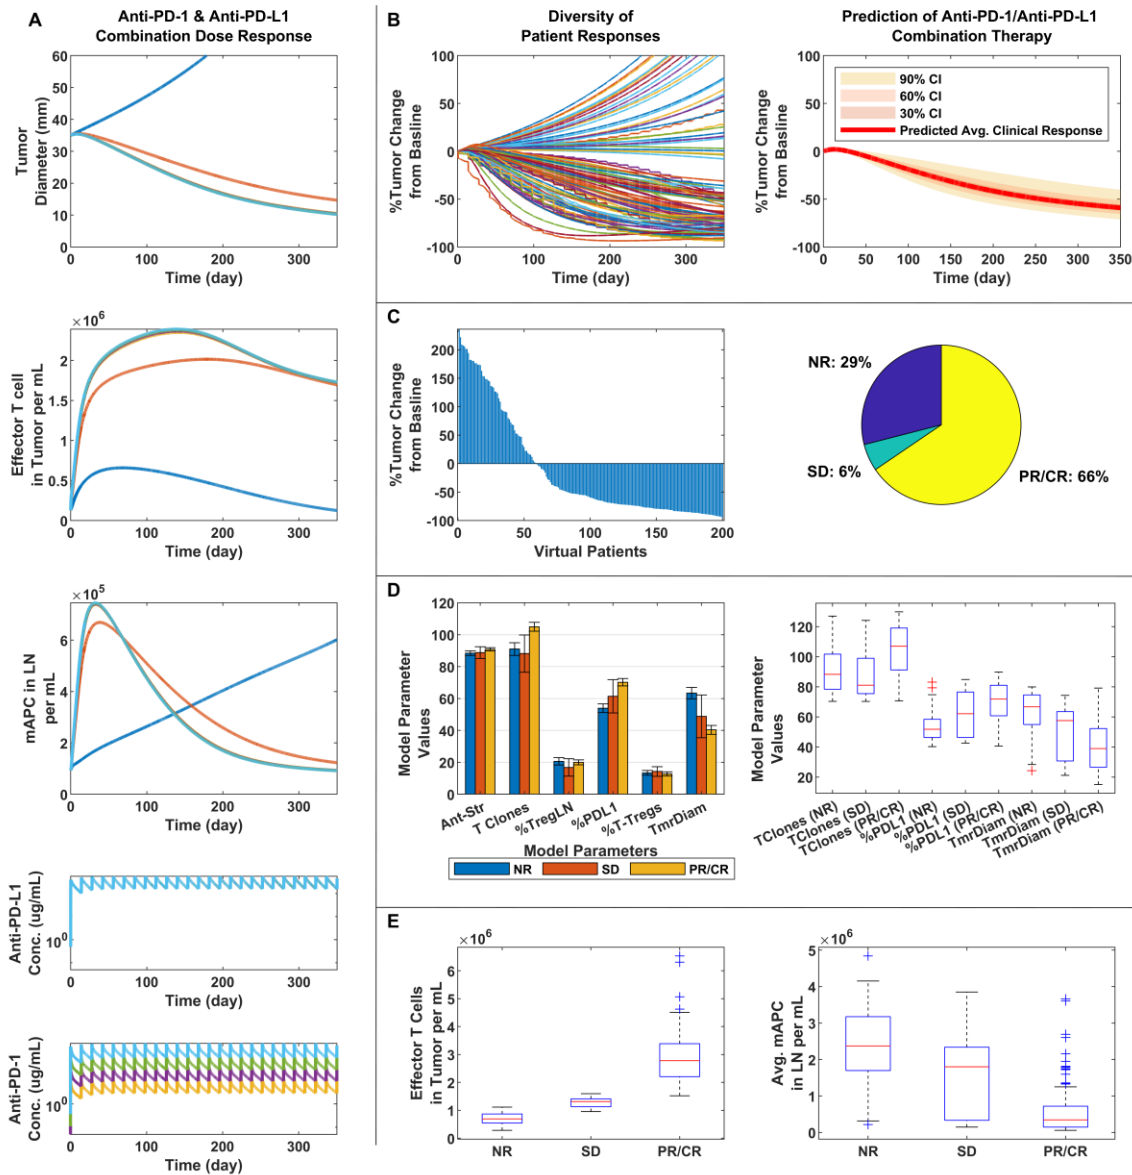

**Figure S3. Dose response and clinical validation of anti-PD-1/anti-PD-L1 combo-therapy.** **A)** From top to bottom: Tumor response to combination therapy at doses of 0.3, 1, 3 and 10 mg/kg of anti-PD-1, as represented by the colors in the bottom figure in ascending order and 20 mg/kg for anti-PD-L1 was used for all simulations; the blue line indicates no therapy (top figure), and orange indicates only anti-PD-L1. Then, Effector T cell density in the tumor (second from the top), mAPC density in the lymph nodes (third from the top) and finally, the PK of anti-PD-L1 and lastly, anti-PD-1 at the given doses. For all following



figures, 20 mg/kg anti-PD-L1 and 3 mg/kg anti-PD-1 was used, following the same regimen. **B)** Diversity of tumor response (left), prediction of median clinical response data (right). **C)** Waterfall plot of VPs (left) and pie chart (right) with percent of virtual non-responders (NR), stable disease (SD) and partial or complete responders (PR/CR). **D)** Bar graph comparison parameters varied in model for each responder type (left) and box plots of significant differentiators (right). **E)** Max Effector T cell density in the tumor (left) and average mAPC density in the lymph nodes (right) for each responder category.

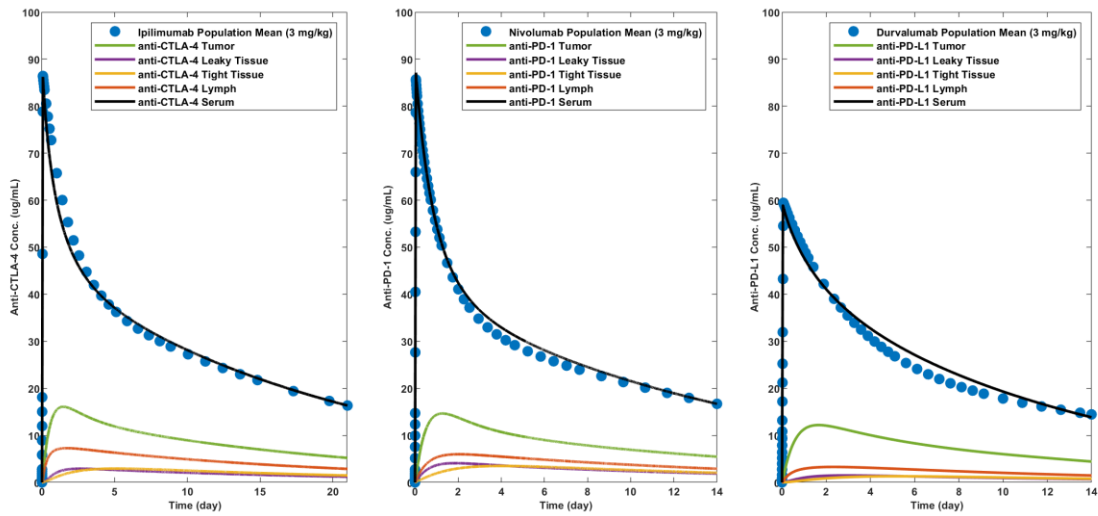

**Figure S4. Pharmacokinetics of A) anti-CTLA-4, B) anti-PD-1 and C) anti-PD-L1 at 3 mg/kg each in the serum, tumor, leaky and tight tissues, lymph and serum. Results are based on a minimal-PBPK model, combined with tumor transport equations with diffusion across the vascular surface area.**

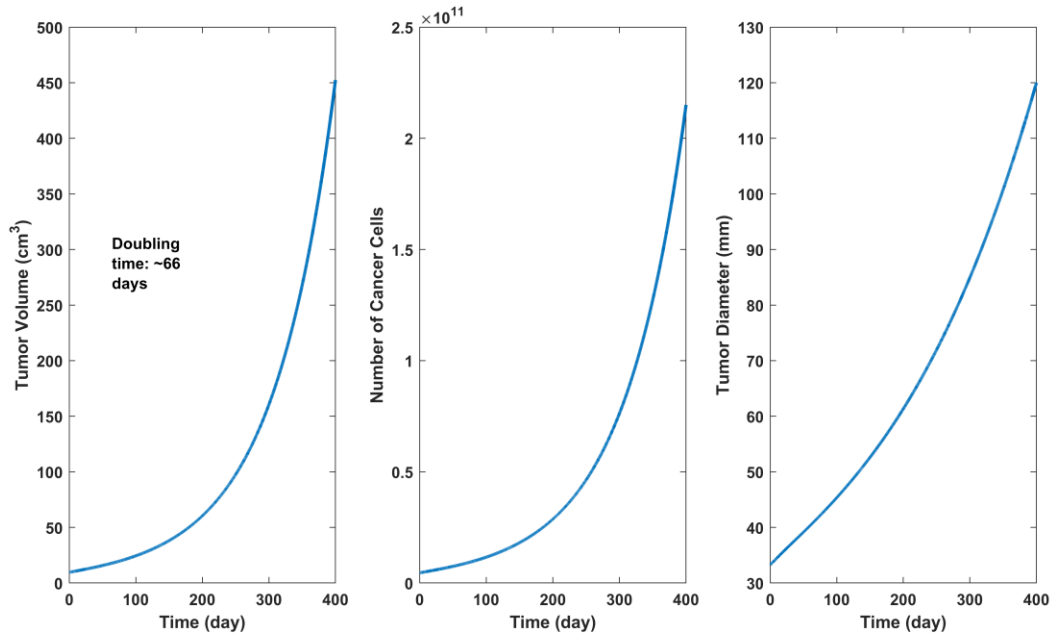

**Figure S5. Simulation of tumor volume doubling time (left) and associated number of cancer cells (middle) and tumor diameter (right).** A tumor doubling time of ~66 days was used for all model simulations. Variability in tumor growth was an emergent outcome for each simulation in the model.

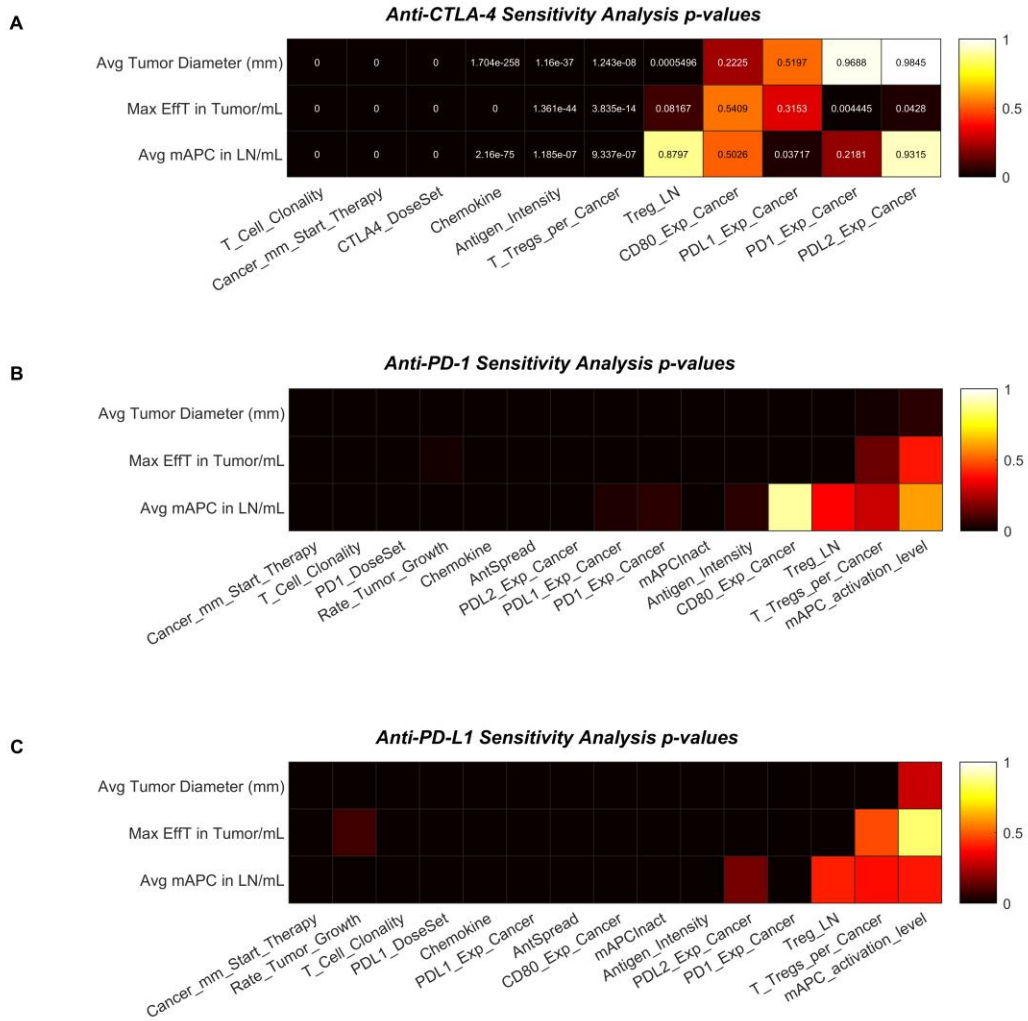

**Figure S6. Sensitivity analysis p-values for A) anti-CTLA-4, B) anti-PD-1 and C) anti-PD-L1.**

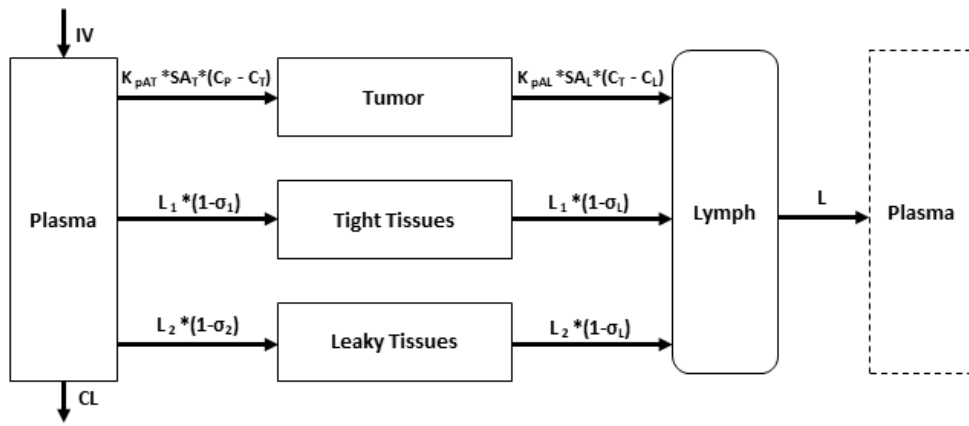

Figure S7. Minimal PBPK model of antibody distribution used in the QSP model.

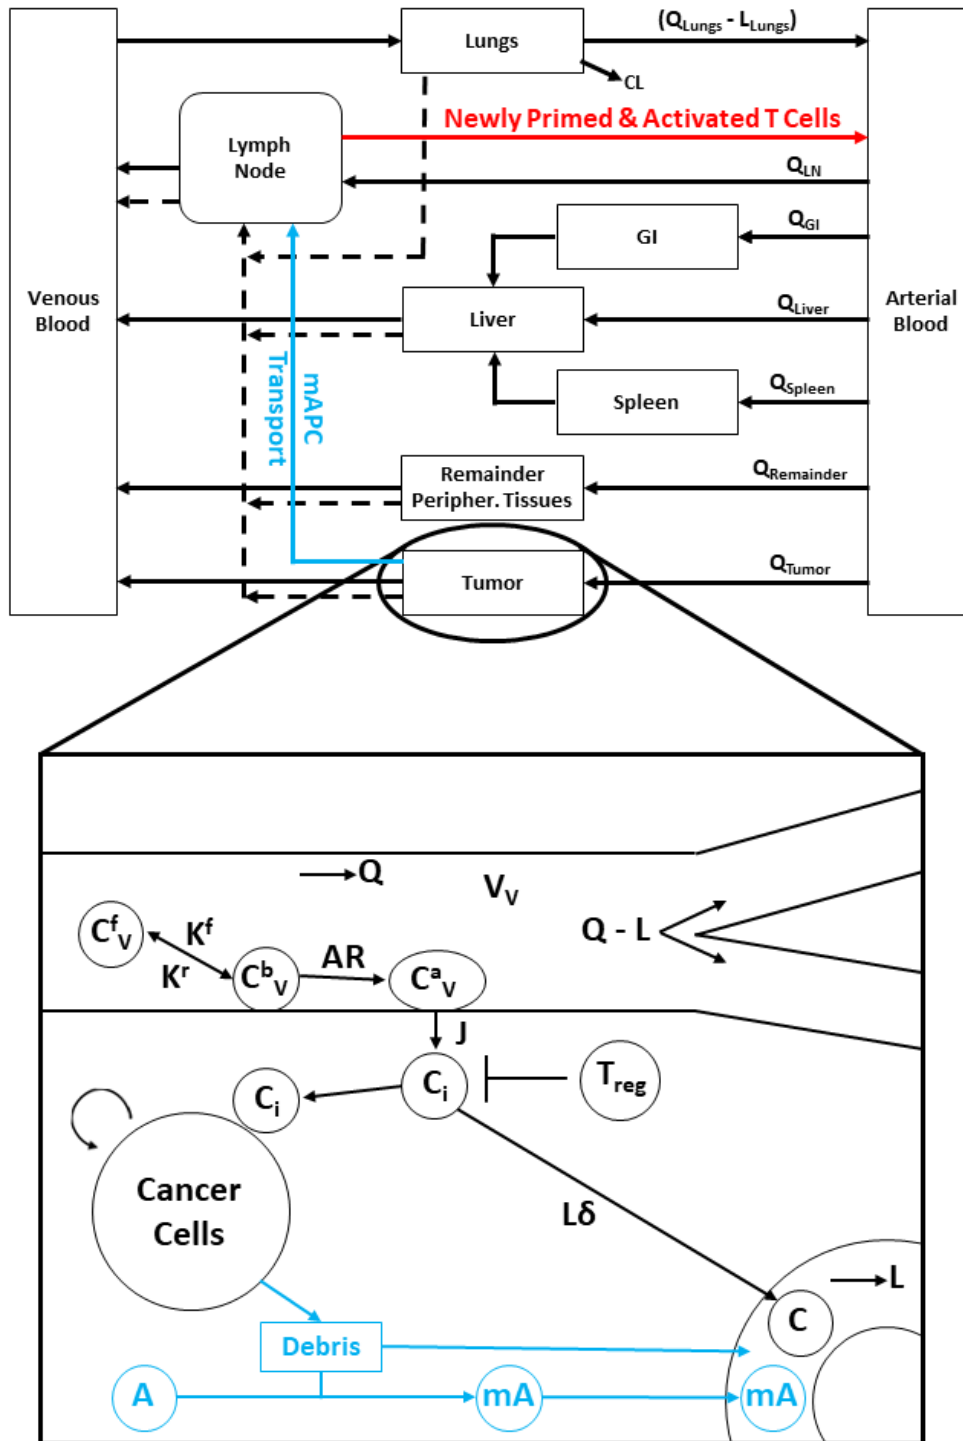

Figure S8. PBPK model cell trafficking used in the QSP model. Model PBPK of Effector T cell (C) trafficking through the tissues in the model via the blood (solid black lines) and lymph (dotted black

lines). Also represented is the trafficking of newly primed and activated Effector T cells from the lymph node to the blood for redistribution (solid red line) the trafficking of mature APCs (solid blue line) to the lymph nodes for priming and activation of naïve T cells to Effector T cells. Cancer Debris also enter the lymph fluid and is brought to the lymph node from the tumor. The bottom panel shows how free Effector cells ( $C_v^f$ ) in the tumor vasculature are bound the vascular wall ( $C_v^b$ ), arrested ( $C_v^a$ ), extravasated (via rate  $J$ ) into the interstitial space ( $C_i$ ) to interact with the cancer cells. Regulatory cells ( $T_{reg}$ ) inhibit the activity of the Effector cells in the tumor and APCs ( $A$ ) pick up debris to become mAPC ( $mA$ ). Effector cells can exit the interstitial space (via rate  $L\delta$ ) and recirculate through the lymphatic system.

**A) Interaction between cancer and Effector T cells in the tumor**

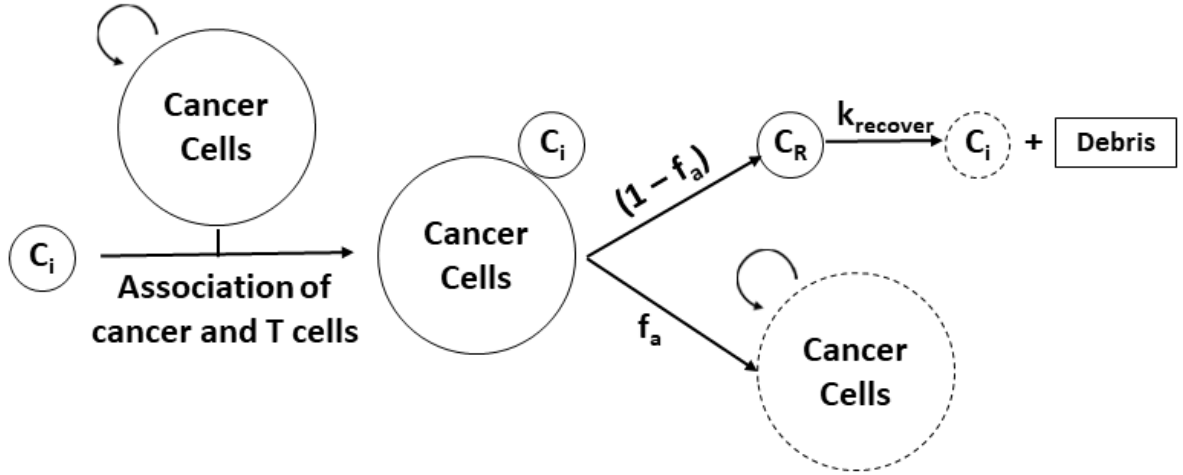

**B) Interaction between regulatory cells and Effector T cells in the tumor**

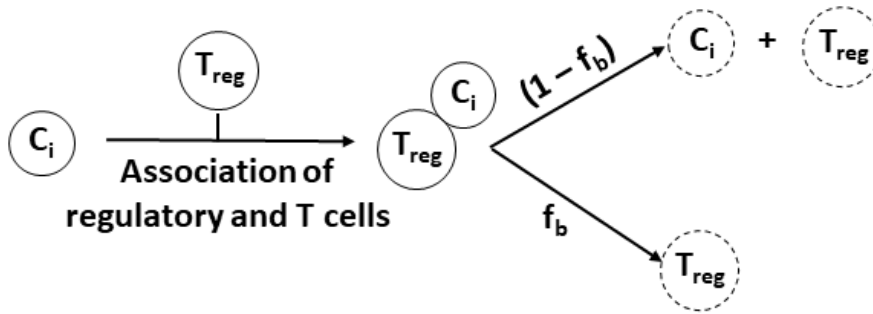

**C) Priming and activation of naïve T cells in the tumor draining lymph node**

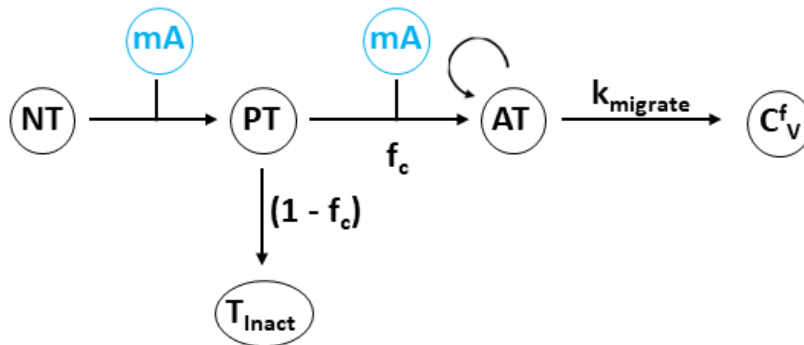

**Figure S9. Abstract representation of cell-cell interactions in the model.** A) Effector T cells in the interstitial space of the tumor ( $C_i$ ) interact with cancer cells to form a bound complex (at a rate defined

by the De Pillis-Radunskaya equation described in the methods, equation 1.3). The complex then dissociates with the regeneration of cancer cells and Effector cells relative to the fraction of active checkpoint signaling ( $f_a$ ). If checkpoint signaling is fully active at inhibiting the Effector cells, for example, then only the cancer cells are regenerated ( $f_a = 1$ ). Alternatively, if antibodies block the signaling to full effect ( $f_a = 0$ ), then only the Effector cells emerge from the bound interaction; along with cancer cell debris that can promote further priming and activation of Effector cells in the lymph nodes. The value of signaling comes out to be between 0 and 1 and is dependent on the checkpoint signaling and interactions with the antibodies that block it. The emerging Effector T cells undergo a recovery delay ( $C_R$ ) before engaging in interactions with other cancer cells. B) Similarly, as described above, Effector T cells in the tumor interstitial space can interact with regulatory cells ( $T_{reg}$ ) to form a state variable representing a bound complex. The dissociation of the bound complex determines to what extent the Effector cells are regenerated, which is directly a function of the checkpoint signaling ( $f_b$ ). C) Mature APCs (mA) interact with naïve and primed T cells (NT and PT, respectively) during two priming stages in the lymph node. Depending on the extent of checkpoint signaling ( $f_c$ ), primed T cells either become anergic ( $T_{inact}$ ) and/or activated T cells (AT); the latter proliferate and become Effector T cells ( $C_V^f$ ) that migrate out into peripheral circulation.
